# Supplementary material for: Iridium‐Catalyzed Asymmetric Hydrogenation of 2,3‐Diarylallyl Amines with a Threonine‐Derived P‐Stereogenic Ligand for the Synthesis of Tetrahydroquinolines and Tetrahydroisoquinolines
Source: PubMed Central journal article supplement (PMC9400882; doi:10.1002/anie.202204300), 2022-05-31
Supplement: ANIE-61-0-s001.pdf [file ANIE-61-0-s001.pdf]

Supporting Information

**Iridium-Catalyzed Asymmetric Hydrogenation of 2,3-Diarylallyl Amines with a Threonine-Derived P-Stereogenic Ligand for the Synthesis of Tetrahydroquinolines and Tetrahydroisoquinolines**

*P. Rojo, M. Molinari, A. Cabré, C. García-Mateos, A. Riera\*, X. Verdaguer\**

## SUPPORTING INFO

### Table of contents

|                                                                                  |     |
|----------------------------------------------------------------------------------|-----|
| 1. General methods .....                                                         | S2  |
| 2. Experimental procedures and characterization.....                             | S3  |
| 2.1 Preparation of substrates .....                                              | S3  |
| 2.1.1 Preparation of 3-aryl propargylic amines <b>1a-c</b> .....                 | S3  |
| 2.1.2 Preparation of alkenyl boronates <b>2a-c</b> .....                         | S5  |
| 2.1.3 Preparation of 2,3-diarylallyl amines <b>3a-p</b> .....                    | S7  |
| 2.2 Preparation of Ir catalysts .....                                            | S15 |
| 2.2.1 Preparation of aminophosphines <b>7</b> .....                              | S15 |
| 2.2.2 Preparation of ligands <b>9a-f</b> .....                                   | S18 |
| 2.2.3 Preparation of catalysts <b>10-15</b> .....                                | S29 |
| 2.2.4 Preparation of dicyclohexylphosphine catalyst <b>17</b> .....              | S39 |
| 2.3 Asymmetric hydrogenation of 2,3-diarylallyl amines <b>3a-p</b> .....         | S41 |
| 2.4 Synthesis of 3-aryl-tetrahydroquinolines <b>21k-m</b> .....                  | S51 |
| 2.5 Synthesis of 4-benzyl-tetrahydroisoquinoline <b>23</b> .....                 | S55 |
| 2.6 References .....                                                             | S56 |
| 3. Crystallographic information .....                                            | S57 |
| 4. Stereochemical course of the asymmetric hydrogenation. ....                   | S61 |
| 5. <sup>1</sup> H-NMR, <sup>13</sup> C-NMR and <sup>31</sup> P-NMR spectra ..... | S62 |

## 1. General methods

### General procedures and materials

Unless otherwise indicated, materials were obtained from commercial suppliers and used without further purification. All reactions that required anhydrous conditions were performed in dried glassware under inert nitrogen atmosphere. Anhydrous and degassed THF, Et<sub>2</sub>O and DCM were taken from a solvent purification system (SPS PS-MD-3). Other anhydrous solvents were purchased from Sigma Aldrich. Benzene-d<sub>6</sub>, toluene and pyrrolidine were degassed via freeze-pump-thaw cycles technique. When handling sensitive compounds, the solvent was removed under reduced pressure using a vacuum line. In other cases, a rotary evaporator was used. Silica gel chromatography was performed by using 35-70 mm silica or an automated chromatography system (PuriFlash® 430, Interchim). Employed methodologies that are described in the literature are duly cited. For already characterized compounds, <sup>1</sup>H-NMR spectrum is reported.

### Instrumentation

**NMR spectroscopy:** NMR spectra were recorded at 23 °C on the NMR spectrometers of the *Centres Científics i Tecnològics de la Universitat de Barcelona*. The employed spectrometers were Varian Mercury 400 MHz, Varian VNMRs 400 MHz, Varian VNMRs 500 MHz and Bruker 400 MHz. <sup>1</sup>H-NMR and <sup>13</sup>C-NMR spectra were referenced to internal solvent resonances and reported relatively to TMS. <sup>31</sup>P-NMR spectra were reported relatively to phosphoric acid. Chemical shifts ( $\delta$ ) are expressed in ppm and the coupling constants ( $J$ ) in Hertz (Hz).

**HPLC analysis:** HPLC analysis was performed on an Agilent Technologies Series 1100 chromatograph with UV detector by Enantia S.L. GC analysis was performed on an Agilent Technologies 6890N with a FID detector by Enantia S.L. The conditions for each analysis are specified in every case.

**High Resolution Mass Spectrometry:** High resolution ESI-MS spectra were recorded either in an LC/MSD-TOF G1969A (Agilent Technologies) of *Centres Científics i Tecnològics de la Universitat de Barcelona* or in a LTQ-FT Ultra (Thermo Scientific) of Institute for Research in Biomedicine (IRB Barcelona).

**IR spectroscopy:** IR spectra were recorded in a Thermo Nicolet 6700 FT-IR spectrometer of the *Department de Química Orgànica i Inorgànica* of *Universitat de Barcelona*, using an ATR system. Absorptions are given in wavenumbers (cm<sup>-1</sup>).

**Optical rotations** were measured at room temperature (25 °C) using a Jasco P-2000 iRM-800 polarimeter. Concentration is expressed in g/100 mL. The cell sized 10 cm long and had 1 mL of capacity, measuring  $\lambda$  was 589 nm, which corresponds to a sodium lamp.

**Melting points** were determined using a Büchi M-540 apparatus without recrystallization of the final solids.

## 2. Experimental procedures and characterization

### 2.1 Preparation of substrates

General synthetic scheme for the synthesis of substrates **3a-p**:

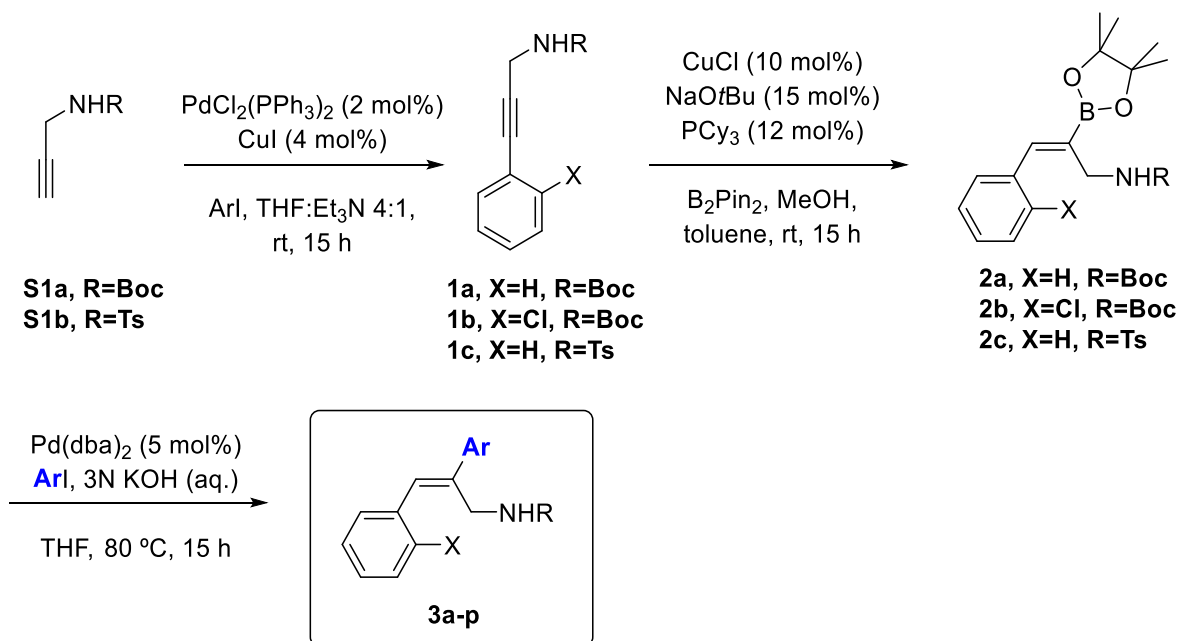

**S1a**<sup>1</sup> and **S1b**<sup>2</sup> were prepared according to literature procedures from commercially available substrates.

#### 2.1.1 Preparation of 3-aryl propargylic amines **1a-c**

##### General procedure for the preparation of **1a-c** (GP1):<sup>3</sup>

A round-bottom flask was charged with CuCl (4 mol%) and PdCl<sub>2</sub>(PPh<sub>3</sub>)<sub>2</sub> (2 mol%), purged with vacuum-nitrogen cycles and dissolved in THF. Then, the corresponding aryl iodide (1.1 eq.) and Et<sub>3</sub>N were sequentially added. The mixture was cooled down to 0 °C and a solution of the prepared propargylic amine (1 eq.) was slowly added. The reaction was stirred at room temperature overnight. Afterwards, saturated NH<sub>4</sub>Cl aqueous solution was added to the reaction mixture, the organic layer was separated and the aqueous phase was extracted thrice with Et<sub>2</sub>O. The combined organic layers

were dried over anhydrous  $\text{MgSO}_4$ , filtered and concentrated under vacuum. The resulting crude was purified by silica column chromatography (hexanes:EtOAc) affording the desired product.

#### Synthesis of *tert*-butyl (3-phenylprop-2-yn-1-yl)carbamate, **1a**

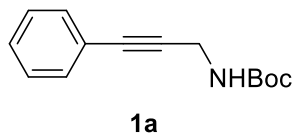

Following GP1, using CuI (76.6 mg, 0.39 mmol, 4 mol%),  $\text{PdCl}_2(\text{PPh}_3)_2$  (141.2 mg, 0.20 mmol, 2 mol%), THF (17 mL), iodobenzene (1.24 mL, 10.84 mmol),  $\text{Et}_3\text{N}$  (4.4 mL) and a solution of **S1a** (1.53 g, 9.86 mmol) in 5 mL of THF. Purification by silica column chromatography (hexanes:EtOAc 9:1) afforded **1a** as white solid (1.88 g, 82% yield).  $^1\text{H-NMR}$  (400 MHz,  $\text{CDCl}_3$ )  $\delta$ : 1.47 (s, 9H), 4.15 (d,  $J = 5.5$  Hz, 2H), 4.75 (br s, 1H), 7.27 – 7.32 (m, 3H), 7.39 – 7.43 (m, 2H). The  $^1\text{H-NMR}$  data agreed with that quoted in the literature.<sup>4</sup>

#### Synthesis of *tert*-butyl (3-(2-chlorophenylphenyl)prop-2-yn-1-yl)carbamate, **1b**

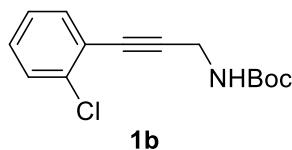

Following GP1, using CuI (121.9 mg, 0.64 mmol, 4 mol%),  $\text{PdCl}_2(\text{PPh}_3)_2$  (229.2 mg, 0.32 mmol, 2 mol%), THF (20.5 mL), 1-chloro-2-iodobenzene (2.15 mL, 17.60 mmol),  $\text{Et}_3\text{N}$  (7.1 mL) and a solution of **S1a** (2.48 g, 16.00 mmol) in 8 mL of THF. Purification by silica column chromatography (hexanes:EtOAc 9:1) afforded **1b** as a white solid (3.42 g, 80% yield).  $^1\text{H NMR}$  (400 MHz,  $\text{CDCl}_3$ )  $\delta$ : 1.47 (s, 9H), 4.21 (d,  $J = 5.6$  Hz, 2H), 4.78 (br s, 1H), 7.19 (td,  $J = 7.5, 1.5$  Hz, 1H), 7.24 (td,  $J = 7.7, 1.9$  Hz, 1H), 7.36 – 7.40 (m, 1H), 7.45 (dd,  $J = 7.3, 2.1$  Hz, 1H) ppm. The  $^1\text{H-NMR}$  data agreed with that quoted in the literature.<sup>5</sup>

#### Synthesis of 4-methyl-*N*-(3-phenylprop-2-yn-1-yl)benzenesulfonamide, **1c**

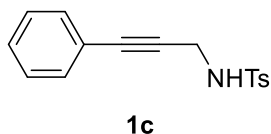

Following GP1, using CuI (56.0 mg, 0.29 mmol, 4 mol%),  $\text{PdCl}_2(\text{PPh}_3)_2$  (102.0 mg, 0.14 mmol, 2 mol%), THF (12 mL), iodobenzene (0.90 mL, 7.88 mmol),  $\text{Et}_3\text{N}$  (4 mL) and a solution of **S1b** (1.50

g, 7.17 mmol) in 4 mL of THF. Purification by silica column chromatography (hexanes:EtOAc 9:1) afforded **1c** as a pale yellow solid (1.31 g, 64% yield). <sup>1</sup>H-NMR (400 MHz, CDCl<sub>3</sub>) δ: 2.36 (s, 3H), 4.08 (d, *J* = 6.1 Hz, 2H), 4.58 (br s, 1H), 7.11 – 7.16 (m, 2H), 7.22 – 7.25 (m, 1H), 7.27 – 7.32 (m, 4H), 7.78 – 7.84 (m, 2H) ppm. The <sup>1</sup>H-NMR data agreed with that quoted in the literature.<sup>6</sup>

### 2.1.2 Preparation of alkenyl boronates **2a-c**

#### General procedure for the preparation of **2a-c** (GP2):<sup>7</sup>

A round-bottom flask was charged with CuCl beads (10 mol%), NaOtBu (15 mol%), tricyclohexylphosphine (12 mol%), B<sub>2</sub>pin<sub>2</sub> (1.1 eq.), propargylamine derivative **2a-c** (1 eq.), purged with vacuum-nitrogen cycles and dissolved in toluene (0.38M). Then, the solution was cooled down to 0 °C and MeOH (2 eq.) was added dropwise. The reaction was stirred at room temperature overnight. Afterwards, the solution was cooled down again to 0 °C and quenched by slow addition of MeOH. After 5 minutes, the mixture was filtered through a pad of Celite®, washed with DCM and concentrated under vacuum. The resulting crude was purified by silica column chromatography (equilibrated with hexanes:Et<sub>3</sub>N 98:2 and eluted with hexanes:EtOAc) affording the desired product.

#### Synthesis of alkenyl boronate **2a**

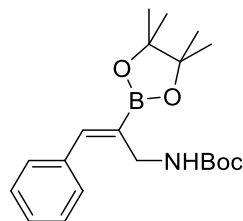

**2a**

Following GP2, using CuCl beads (40.2 mg, 0.41 mmol, 10 mol%), NaOtBu (60.3 mg, 0.61 mmol, 15 mol%), tricyclohexylphosphine (136.8 mg, 0.49 mmol, 12 mol%), B<sub>2</sub>pin<sub>2</sub> (1.13 g, 4.47 mmol), **1a** (938.8 mg, 4.06 mmol), toluene (10.7 mL) and MeOH (0.33 mL, 8.12 mmol). Purification by silica column chromatography (equilibrated with hexanes:Et<sub>3</sub>N 98:2 and eluted with hexanes:EtOAc from 9:1 to 1:1) afforded **2a** as a white solid (1.10 g, 75% yield). **M.p.:** 114 – 117 °C. **IR (ATR-FTIR)**  $\nu_{\text{max}}$ : 3419, 2973, 2938, 1710, 1510, 1364 cm<sup>-1</sup>. <sup>1</sup>H-NMR (400 MHz, CDCl<sub>3</sub>) δ: 1.32 (s, 12H), 1.43 (s, 9H), 4.05 (br s, 1H), 4.14 (s, 2H), 5.20 (br s, 1H), 7.30 – 7.36 (m, 5H) ppm. <sup>13</sup>C-NMR (101 MHz, CDCl<sub>3</sub>) δ: 25.0, 28.6, 29.9, 40.3, 79.2, 84.0, 128.0, 128.4, 128.9, 129.4, 144.4, 155.9 ppm. **HRMS (ESI):** calc for [C<sub>20</sub>H<sub>30</sub>BNO<sub>4</sub>+H]<sup>+</sup>: 360.2340, found 360.2342.

### Synthesis of alkenyl boronate **2b**

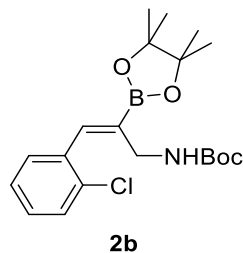

Following GP2, using CuCl beads (48.2 mg, 0.49 mmol, 10 mol%), NaOtBu (72.4 mg, 0.73 mmol, 15 mol%), tricyclohexylphosphine (164.2 mg, 0.58 mmol, 12 mol%), B<sub>2</sub>pin<sub>2</sub> (1.36 g, 5.36 mmol), **1b** (1.29 g, 4.87 mmol), toluene (12.8 mL) and MeOH (0.39 mL, 9.74 mmol). Purification by silica column chromatography (equilibrated with hexanes:Et<sub>3</sub>N 98:2 and eluted with hexanes:EtOAc from 9:1 to 1:1) afforded **2b** as a white solid (1.58 g, 82% yield). **M.p.:** 96 – 97 °C. **IR (ATR-FTIR)**  $\nu_{\text{max}}$ : 3425, 2976, 2930, 2862, 1709, 1615, 1512 cm<sup>-1</sup>. **<sup>1</sup>H-NMR (400 MHz, CDCl<sub>3</sub>)**  $\delta$ : 1.32 (s, 12H), 1.42 (s, 9H), 3.98 (s, 2H), 5.12 (br s, 1H), 7.18 – 7.25 (m, 2H), 7.29 – 7.35 (m, 1H), 7.35 – 7.42 (m, 2H) ppm. **<sup>13</sup>C-NMR (101 MHz, CDCl<sub>3</sub>)**  $\delta$ : 24.9, 28.4, 28.6, 40.27, 78.9, 84.1, 126.6, 129.2, 129.5, 130.7, 133.7, 135.2, 141.2, 155.7 ppm. **HRMS (ESI):** calc for [C<sub>20</sub>H<sub>29</sub>BClNO<sub>4</sub>+H]<sup>+</sup>: 394.1950, found 394.1951.

### Synthesis of alkenyl boronate **2c**

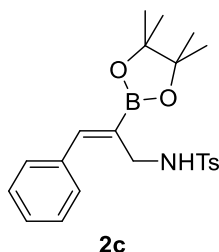

Following GP2, using CuCl beads (53.0 mg, 0.53 mmol, 10 mol%), NaOtBu (76.0 mg, 0.77 mmol, 15 mol%), tricyclohexylphosphine (178.0 mg, 0.63 mmol, 12 mol%), B<sub>2</sub>pin<sub>2</sub> (1.45 g, 5.72 mmol), **1c** (1.48 g, 5.18 mmol), toluene (13.6 mL) and MeOH (0.42 mL, 10.36 mmol). Purification by silica column chromatography (equilibrated with hexanes:Et<sub>3</sub>N 98:2 and eluted with hexanes:EtOAc from 85:15 to 1:1) afforded **2c** as a white solid (1.03 g, 48% yield). **M.p.:** 128 – 132 °C. **IR (ATR-FTIR)**  $\nu_{\text{max}}$ : 3324, 2976, 2923, 1615, 1449, 1373, 1332 cm<sup>-1</sup>. **<sup>1</sup>H-NMR (400 MHz, CDCl<sub>3</sub>)**  $\delta$ : 1.25 (s, 12H), 2.40 (s, 3H), 3.94 (dd, *J* = 5.9, 1.5 Hz, 2H), 5.34 (t, *J* = 6.1 Hz, 1H), 7.14 – 7.23 (m, 5H), 7.25 – 7.34 (m, 3H), 7.60 – 7.64 (m, 2H) ppm. **<sup>13</sup>C-NMR (101 MHz, CDCl<sub>3</sub>)**  $\delta$ : 21.5, 24.5, 24.8, 42.7, 84.1,

127.3, 128.1, 128.3, 129.0, 129.4, 136.0, 137.0, 143.0, 145.7 ppm. **HRMS (ESI):** calc for  $[C_{22}H_{28}BNO_4+H]^+$ : 414.1904, found 414.1914.

### 2.1.3 Preparation of 2,3-diarylallyl amines 3a-p

#### General procedure for the preparation of 3a-p (GP3):<sup>8</sup>

A screw-capped vial was charged with  $Pd(dba)_2$  (5 mol%) and, if solid, the corresponding aryl iodide (1.1 eq.). The vial was evacuated and purged with nitrogen. Anhydrous THF (7 mL/mmol) and, if liquid, the corresponding ArI, were added to the vial and the reaction was stirred at room temperature for 5 minutes. Then, a solution of the corresponding alkenyl boronate **2a-c** (1 eq.) in THF (2.8 mL/mmol) and an aqueous solution of 3N KOH (1 mL/mmol) were sequentially added. The reaction was heated at 80 °C in an oil bath for 15 h. Afterwards, the mixture was cooled, filtered through a short Celite® pad and washed with DCM. The filtrate was concentrated and the crude was purified by silica column chromatography using hexanes:EtOAc as eluent, affording the desired product.

#### *tert*-Butyl (*Z*)-(2-(4-methoxyphenyl)-3-phenylallyl)carbamate, **3a**

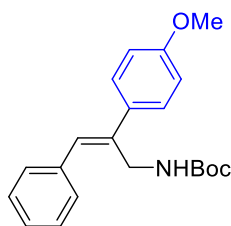

**3a**

Following GP3, using  $Pd(dba)_2$  (48.0 mg, 0.08 mmol), 4-iodoanisole (429.8 mg, 1.83 mmol), THF (16.3 mL), **2a** (600.0 mg, 1.67 mmol) and KOH 3N (1.67 mL). Purification by silica column chromatography (hexanes:EtOAc 9:1) afforded **3a** as a white solid (514.0 mg, 91% yield). **M.p.:** 81 – 83 °C. **IR (ATR-FTIR)**  $\nu_{max}$ : 3346, 2979, 1669, 1513  $cm^{-1}$ . **<sup>1</sup>H-NMR (400 MHz, CDCl<sub>3</sub>)**  $\delta$ : 1.40 (s, 9H), 3.84 (s, 3H), 4.40 (br s, 3H), 6.88 (s, 1H), 6.90 – 6.95 (m, 2H), 7.27 – 7.33 (m, 3H), 7.35 – 7.40 (m, 2H), 7.47 (d,  $J = 8.4$  Hz, 2H) ppm. **<sup>13</sup>C-NMR (101 MHz, CDCl<sub>3</sub>)**  $\delta$ : 28.4, 39.7, 55.3, 79.4, 114.0, 127.1, 127.7, 128.4, 128.9, 129.6, 132.5, 137.0, 137.3, 155.7, 159.4 ppm. **HRMS (ESI):** calc for  $[C_{21}H_{25}NO_3+Na]^+$ : 362.1727, found 362.1727.



***tert*-Butyl (*Z*)-(2-(4-chlorophenyl)-3-phenylallyl)carbamate, 3b**

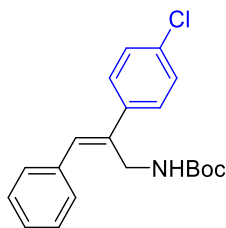

**3b**

Following GP3, using Pd(dba)<sub>2</sub> (20.1 mg, 0.03 mmol), 1-chloro-4-iodobenzene (184.0 mg, 0.77 mmol), THF (7.7 mL), **2a** (251.5 mg, 0.70 mmol) and KOH 3N (0.7 mL). Purification by silica column chromatography (hexanes:EtOAc 9:1) afforded **3b** as a pale yellow solid (191.0 mg, 80% yield). **M.p.:** 94 – 97 °C. **IR (ATR-FTIR)  $\nu_{\text{max}}$ :** 3343, 2973, 2936, 1673, 1519, 1492 cm<sup>-1</sup>. **<sup>1</sup>H-NMR (400 MHz, CDCl<sub>3</sub>)  $\delta$ :** 1.39 (s, 9H), 4.40 (s, 3H), 6.93 (s, 1H), 7.31 (d, *J* = 7.5 Hz, 3H), 7.32 – 7.43 (m, 4H), 7.46 (d, *J* = 8.2 Hz, 2H) ppm. **<sup>13</sup>C-NMR (101 MHz, CDCl<sub>3</sub>)  $\delta$ :** 28.3, 39.6, 79.6, 127.5, 128.4, 128.5, 126.7, 128.79, 129.0, 131.4, 136.5, 137.1, 143.3, 155.5 ppm. **HRMS (ESI):** calc for [C<sub>20</sub>H<sub>22</sub>ClNO<sub>2</sub>+Na]<sup>+</sup>: 366.1231, found 366.1235.

***tert*-Butyl (*Z*)-(2-(4-fluorophenyl)-3-phenylallyl)carbamate, 3c**

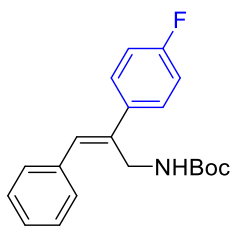

**3c**

Following GP3, using Pd(dba)<sub>2</sub> (20.1 mg, 0.03 mmol), 1-fluoro-4-iodobenzene (171.0 mg, 0.77 mmol), THF (7.7 mL), **2a** (251.5 mg, 0.70 mmol) and KOH 3N (0.7 mL). Purification by silica column chromatography (hexanes:EtOAc 9:1) afforded **3c** as a pale yellow solid (106.0 mg, 47% yield). **M.p.:** 106 – 110 °C. **IR (ATR-FTIR)  $\nu_{\text{max}}$ :** 3352, 2982, 1672, 1518, 1508 cm<sup>-1</sup>. **<sup>1</sup>H-NMR (400 MHz, CDCl<sub>3</sub>)  $\delta$ :** 1.39 (s, 9H), 4.40 (br s, 3H), 6.89 (s, 1H), 7.07 (t, *J* = 8.7 Hz, 2H), 7.28 – 7.33 (m, 3H), 7.36 – 7.42 (m, 2H), 7.45 – 7.54 (m, 2H) ppm. **<sup>13</sup>C-NMR (101 MHz, CDCl<sub>3</sub>)  $\delta$ :** 28.3, 39.7, 79.9, 115.4 (d, *J<sub>F</sub>* = 21.3 Hz), 127.4, 128.3 (d, *J<sub>F</sub>* = 8.1 Hz), 128.5, 128.8, 129.0, 131.0, 136.6, 137.2, 155.7, 162.5 (d, *J<sub>F</sub>* = 247.1 Hz) ppm. **HRMS (ESI):** calc for [C<sub>20</sub>H<sub>22</sub>FNO<sub>2</sub>+Na]<sup>+</sup>: 350.1527, found 350.1527.

***tert*-Butyl (Z)-(2-(4-benzoylphenyl)-3-phenylallyl)carbamate, 3d**

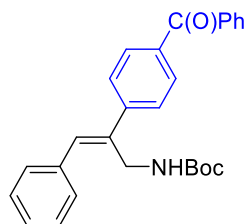

**3d**

Following GP3, using Pd(dba)<sub>2</sub> (20.1 mg, 0.03 mmol), (4-iodophenyl)(phenyl)methanone (237.0 mg, 0.77 mmol), THF (7.7 mL), **2a** (251.5 mg, 0.70 mmol) and KOH 3N (0.7 mL). Purification by silica column chromatography (hexanes:EtOAc 9:1) afforded **3d** as a pale yellow solid (268.0 mg, 93% yield). **M.p.:** 92 – 95 °C. **IR (ATR-FTIR)**  $\nu_{\text{max}}$ : 3333, 2979, 2936, 2368, 1674, 1651, 1598, 1509 cm<sup>-1</sup>. **<sup>1</sup>H-NMR (400 MHz, CDCl<sub>3</sub>)  $\delta$ :** 1.40 (s, 9H), 4.48 (br s, 3H), 7.07 (s, 1H), 7.29 – 7.38 (m, 3H), 7.38 – 7.45 (m, 2H), 7.50 (t, *J* = 7.6 Hz, 2H), 7.60 (d, *J* = 7.3 Hz, 1H), 7.64 (d, *J* = 7.3 Hz, 2H), 7.80 – 7.88 (m, 4H) ppm. **<sup>13</sup>C-NMR (101 MHz, CDCl<sub>3</sub>)  $\delta$ :** 28.3, 39.5, 79.9, 126.5, 127.7, 128.3, 128.4, 128.6, 128.9, 130.0, 130.5, 132.4, 132.8, 136.3, 137.4, 137.6, 144.4, 196.2 ppm. **HRMS (ESI):** calc for [C<sub>27</sub>H<sub>27</sub>NO<sub>3</sub>+Na]<sup>+</sup>: 436.1883, found 436.1886.

**Methyl (Z)-4-(3-((*tert*-butoxycarbonyl)amino)-1-phenylprop-1-en-2-yl)benzoate, 3e**

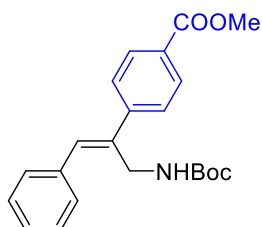

**3e**

Following GP3, using Pd(dba)<sub>2</sub> (20.1 mg, 0.03 mmol), methyl 4-iodobenzoate (202.0 mg, 0.77 mmol), THF (7.7 mL), **2a** (251.5 mg, 0.70 mmol) and KOH 3N (0.7 mL). Purification by silica column chromatography (hexanes:EtOAc 9:1) afforded **3e** as a pale yellow solid (130.0 mg, 51% yield). **M.p.:** 98 – 100 °C. **IR (ATR-FTIR)**  $\nu_{\text{max}}$ : 3349, 2982, 1718, 1671, 1509 cm<sup>-1</sup>. **<sup>1</sup>H-NMR (400 MHz, CDCl<sub>3</sub>)  $\delta$ :** 1.39 (s, 9H), 3.94 (s, 3H), 4.41 (br s, 1H), 4.45 (s, 2H), 7.03 (s, 1H), 7.29 – 7.35 (m, 3H), 7.38 – 7.42 (m, 2H), 7.59 (d, *J* = 8.2 Hz, 2H), 8.02 – 8.07 (m, 2H) ppm. **<sup>13</sup>C-NMR (101 MHz, CDCl<sub>3</sub>)  $\delta$ :** 28.3, 39.5, 52.1, 79.6, 126.6, 127.7, 128.5, 128.8, 129.3, 129.8, 132.7, 136.3, 137.4, 144.8, 155.6, 166.8 ppm. **HRMS (ESI):** calc for [C<sub>22</sub>H<sub>25</sub>NO<sub>4</sub>+Na]<sup>+</sup>: 390.1676, found 390.1675.

***tert*-Butyl (Z)-(2-(2-methoxyphenyl)-3-phenylallyl)carbamate, 3f**

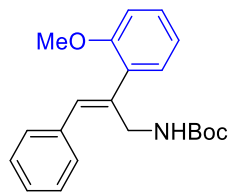

**3f**

Following GP3, using Pd(dba)<sub>2</sub> (20.1 mg, 0.03 mmol), 2-iodoanisole (180.0 mg, 0.77 mmol), THF (7.7 mL), **2a** (251.5 mg, 0.70 mmol) and KOH 3N (0.7 mL). Purification by silica column chromatography (hexanes:EtOAc 9:1) afforded **3f** as a white solid (150.0 mg, 64% yield). **M.p.**: 58 – 61 °C. **IR (ATR-FTIR)**  $\nu_{\text{max}}$ : 3440, 2974, 2243, 1702, 1489 cm<sup>-1</sup>. **<sup>1</sup>H-NMR (400 MHz, CDCl<sub>3</sub>)**  $\delta$ : 1.32 (s, 9H), 3.86 (s, 3H), 4.37 (d, *J* = 5.5 Hz, 2H), 4.61 (br s, 1H), 6.62 (s, 1H), 6.91 (d, *J* = 8.2, 1H), 6.98 (t, *J* = 7.4 Hz, 1H), 7.26 – 7.33 (m, 3H), 7.34 – 7.41 (m, 4H) ppm. **<sup>13</sup>C-NMR (101 MHz, CDCl<sub>3</sub>)**  $\delta$ : 28.3, 41.3, 55.5, 79.2, 110.6, 114.2, 116.3, 120.9, 127.0, 128.3, 128.9, 129.0, 130.7, 131.7, 155.7 ppm. **HRMS (ESI)**: calc for [C<sub>21</sub>H<sub>25</sub>NO<sub>3</sub>+H]<sup>+</sup>: 340.1907, found 340.1900.

***tert*-Butyl (Z)-(2-(2-fluorophenyl)-3-phenylallyl)carbamate, 3g**

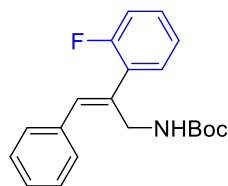

**3g**

Following GP3, using Pd(dba)<sub>2</sub> (20.1 mg, 0.03 mmol), 1-fluoro-2-iodobenzene (171.0 mg, 0.77 mmol), THF (7.7 mL), **2a** (251.5 mg, 0.70 mmol) and KOH 3N (0.7 mL). Purification by silica column chromatography (hexanes:EtOAc 9:1) afforded **3g** as a yellow oil (170.0 mg, 75% yield). **IR (ATR-FTIR)**  $\nu_{\text{max}}$ : 3443, 2976, 2243, 1701, 1494 cm<sup>-1</sup>. **<sup>1</sup>H-NMR (400 MHz, CDCl<sub>3</sub>)**  $\delta$ : 1.32 (s, 9H), 4.38 (d, *J* = 5.9 Hz, 2H), 4.52 (br s, 1H), 6.76 (s, 1H), 7.04 – 7.12 (m, 1H), 7.11 – 7.20 (m, 1H), 7.25 – 7.34 (m, 2H), 7.33 – 7.43 (m, 5H) ppm. **<sup>13</sup>C-NMR (101 MHz, CDCl<sub>3</sub>)**  $\delta$ : 28.2, 40.9, 79.2, 115.6 (d, *J*<sub>F</sub> = 22.7 Hz), 124.2 (d, *J*<sub>F</sub> = 3.5 Hz), 125.4, 127.4, 128.4, 129.0, 129.1 (d, *J*<sub>F</sub> = 8.2 Hz), 130.7 (d, *J*<sub>F</sub> = 4.0 Hz), 133.2, 136.3, 143.3, 155.4, 160.1 (d, *J*<sub>F</sub> = 246.2 Hz) ppm. **HRMS (ESI)**: calc for [C<sub>20</sub>H<sub>22</sub>FNO<sub>2</sub>+Na]<sup>+</sup>: 350.1527, found 350.1532.

***tert*-Butyl (Z)-(3-phenyl-2-(*o*-tolyl)allyl)carbamate, 3h**

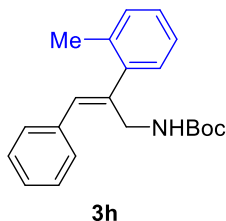

Following GP3, using Pd(dba)<sub>2</sub> (20.1 mg, 0.03 mmol), 1-iodo-2-methylbenzene (168.0 mg, 0.77 mmol), THF (7.7 mL), **2a** (251.5 mg, 0.70 mmol) and KOH 3N (0.7 mL). Purification by silica column chromatography (hexanes:EtOAc 9:1) afforded **3h** as a white solid (181.0 mg, 80% yield). **M.p.:** 117 – 119 °C. **IR (ATR-FTIR)**  $\nu_{\text{max}}$ : 3447, 2979, 2251, 1701, 1495 cm<sup>-1</sup>. **<sup>1</sup>H-NMR (400 MHz, CDCl<sub>3</sub>)**  $\delta$ : 1.33 (s, 9H), 2.38 (s, 3H), 4.33 (s, 3H), 6.51 (s, 1H), 7.17 – 7.24 (m, 4H), 7.27 – 7.31 (m, 1H), 7.34 – 7.40 (m, 3H), 7.41 – 7.44 (m, 1H) ppm. **<sup>13</sup>C-NMR (101 MHz, CDCl<sub>3</sub>)**  $\delta$ : 19.9, 28.3, 41.5, 79.2, 125.6, 127.2, 127.4, 128.4, 128.9, 129.0, 129.1, 130.3, 131.7, 135.8, 136.5, 143.3, 155.5 ppm. **HRMS (ESI):** calc for [C<sub>21</sub>H<sub>25</sub>NO<sub>2</sub>+Na]<sup>+</sup>: 346.1778, found 346.1778.

***tert*-Butyl (Z)-(2-(3,5-dimethylphenyl)-3-phenylallyl)carbamate, 3i**

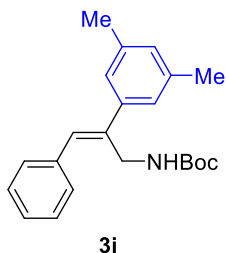

Following GP3, using Pd(dba)<sub>2</sub> (20.1 mg, 0.03 mmol), 1-iodo-3,5-dimethylbenzene (179.0 mg, 0.77 mmol), THF (7.7 mL), **2a** (251.5 mg, 0.70 mmol) and KOH 3N (0.7 mL). Purification by silica column chromatography (hexanes:EtOAc 9:1) afforded **3i** as a white solid (170.0 mg, 72% yield). **M.p.:** 84 – 86 °C. **IR (ATR-FTIR)**  $\nu_{\text{max}}$ : 3343, 2982, 2924, 1668, 1518, 1321 cm<sup>-1</sup>. **<sup>1</sup>H-NMR (400 MHz, CDCl<sub>3</sub>)**  $\delta$ : 1.40 (s, 9H), 2.35 (s, 6H), 4.41 (s, 3H), 6.92 (br s, 1H), 6.97 (s, 1H), 7.13 (s, 2H), 7.26 – 7.34 (m, 3H), 7.35 – 7.40 (m, 2H) ppm. **<sup>13</sup>C-NMR (101 MHz, CDCl<sub>3</sub>)**  $\delta$ : 21.4, 28.3, 39.8, 79.3, 124.5, 127.2, 128.4, 128.8, 129.5, 130.7, 136.9, 138.0, 138.01, 140.1, 155.6 ppm. **HRMS (ESI):** calc for [C<sub>21</sub>H<sub>27</sub>NO<sub>2</sub>+Na]<sup>+</sup>: 360.1934, found 360.1942.

***tert*-Butyl (Z)-(2-(3,4-dimethoxyphenyl)-3-phenylallyl)carbamate, 3j**

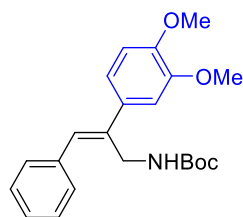

**3j**

Following GP3, using Pd(dba)<sub>2</sub> (72.0 mg, 0.13 mmol), 3,4-dimethoxy-1-iodobenzene (0.44 mL, 2.76 mmol), THF (25 mL), **2a** (900.0 mg, 2.51 mmol) and KOH 3N (2.5 mL). Purification by silica column chromatography (cyclohexane:EtOAc 8:2) afforded **3j** as a pale yellow solid (636.2 mg, 69% yield). **M.p.:** 109 – 110 °C. **IR (ATR-FTIR)  $\nu_{\text{max}}$ :** 3265, 3053, 2971, 2949, 2921, 2832, 1698, 1668, 1548, 1519 cm<sup>-1</sup>. **<sup>1</sup>H-NMR (400 MHz, CDCl<sub>3</sub>)  $\delta$ :** 1.40 (s, 9H), 3.91 (s, 3H), 3.93 (s, 3H), 4.42 (s, 3H), 6.84 – 6.95 (m, 2H), 7.03 – 7.15 (m, 2H), 7.26 – 7.35 (m, 3H), 7.38 (t, *J* = 7.6 Hz, 2H) ppm. **<sup>13</sup>C-NMR (101 MHz, CDCl<sub>3</sub>)  $\delta$ :** 28.3, 39.6, 55.9, 55.9, 79.4, 109.8, 111.1, 118.9, 127.2, 128.5, 128.8, 129.7, 132.8, 136.9, 137.6, 148.9, 148.9, 155.7 ppm. **HRMS (ESI):** calc for [C<sub>22</sub>H<sub>27</sub>NO<sub>4</sub>-tBu]<sup>+</sup>: 314.1387, found 314.1390.

***tert*-Butyl (Z)-(3-(2-chlorophenyl)-2-phenylallyl)carbamate, 3k**

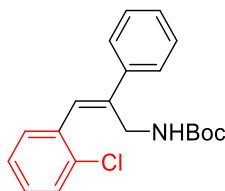

**3k**

Following GP3, using Pd(dba)<sub>2</sub> (99.1 mg, 0.17 mmol), iodobenzene (0.44 mL, 3.79 mmol), THF (34.5 mL), **2b** (1.44 g, 3.45 mmol) and KOH 3N (3.5 mL). Purification by silica column chromatography (hexanes:EtOAc 95:5) afforded **3k** as a pale yellow solid (987.3 mg, 83% yield). **<sup>1</sup>H-NMR (400 MHz, CDCl<sub>3</sub>)  $\delta$ :** 1.37 (s, 9H), 4.32 (d, *J* = 5.2 Hz, 2H), 4.39 (br s, 1H), 6.95 (s, 1H), 7.22 – 7.37 (m, 4H), 7.38 – 7.45 (m, 3H), 7.56 (d, *J* = 7.6 Hz, 2H) ppm. The <sup>1</sup>H-NMR data agreed with that quoted in the literature.<sup>5</sup>

***tert*-Butyl (Z)-(3-(2-chlorophenyl)-2-(4-fluorophenyl)allyl)carbamate, 3l**

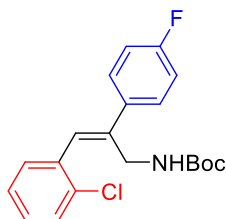

**3l**

Following GP3, using Pd(dba)<sub>2</sub> (103.0 mg, 0.18 mmol), 1-fluoro-2-iodobenzene (0.42 mL, 3.94 mmol), THF (35.5 mL), **2b** (1.50 g, 3.58 mmol) and KOH 3N (3.6 mL). Purification by silica column chromatography (hexanes:EtOAc 95:5) afforded **3l** as a white solid (1.12 g, 87% yield). **M.p.:** 119 – 120 °C. **IR (ATR-FTIR)**  $\nu_{\max}$ : 3322, 2975, 2927, 1672, 1538, 1510 cm<sup>-1</sup>. **<sup>1</sup>H-NMR (400 MHz, CDCl<sub>3</sub>)**  $\delta$ : 1.37 (s, 9H), 4.29 (d, *J* = 5.4 Hz, 2H), 4.37 (br s, 1H), 6.88 (s, 1H), 7.08 (t, *J* = 8.7 Hz, 2H), 7.27 – 7.33 (m, 2H), 7.43 (dd, *J* = 7.1, 1.8 Hz, 1H), 7.49 – 7.61 (m, 2H) ppm. **<sup>13</sup>C-NMR (101 MHz, CDCl<sub>3</sub>)**  $\delta$ : 28.4, 39.8, 79.7, 115.6 (d, *J*<sub>F</sub> = 21.5 Hz), 126.9, 128.0, 128.7 (d, *J*<sub>F</sub> = 8.0 Hz), 129.0, 129.7, 130.6, 134.1, 135.3, 135.6, 139.0, 155.7, 162.8 (d, *J*<sub>F</sub> = 247.4 Hz) ppm. **HRMS (ESI):** calc for [C<sub>20</sub>H<sub>21</sub>ClFNO<sub>2</sub>-*t*Bu]<sup>+</sup>: 306.0692, found 306.0699.

***tert*-Butyl (Z)-(3-(2-chlorophenyl)-2-(2-methoxyphenyl)allyl)carbamate, 3m**

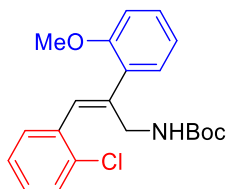

**3m**

Following GP3, using Pd(dba)<sub>2</sub> (68.6 mg, 0.12 mmol), 2-iodoanisole (0.35 mL, 2.63 mmol), THF (23.6 mL), **2b** (1.00 g, 2.39 mmol) and KOH 3N (2.4 mL). Purification by silica column chromatography (hexanes:EtOAc 95:5) afforded **3m** as a white solid (721.0 mg, 81% yield). **M.p.:** 77 – 78 °C. **IR (ATR-FTIR)**  $\nu_{\max}$ : 2987, 2952, 2879, 1716, 1541, 1521, 1507 cm<sup>-1</sup>. **<sup>1</sup>H-NMR (400 MHz, CDCl<sub>3</sub>)**  $\delta$ : 1.30 (s, 9H), 3.87 (s, 3H), 4.17 – 4.30 (m, 2H), 4.54 (br s, 1H), 6.68 (s, 1H), 6.92 (d, *J* = 8.2 Hz, 1H), 6.99 (t, *J* = 6.9 Hz, 1H), 7.18 – 7.25 (m, 1H), 7.26 – 7.30 (m, 1H), 7.29 – 7.37 (m, 2H), 7.43 (dd, *J* = 17.7, 7.6 Hz, 2H) ppm. **<sup>13</sup>C-NMR (101 MHz, CDCl<sub>3</sub>)**  $\delta$ : 28.4, 41.3, 55.7, 79.0, 110.9, 121.1, 126.7, 128.6, 128.9, 129.3, 129.5, 130.4, 130.9, 131.0, 134.0, 135.3, 140.0, 155.7, 157.0 ppm. **HRMS (ESI):** calc for [C<sub>21</sub>H<sub>24</sub>ClNO<sub>3</sub>+H]<sup>+</sup>: 374.1517, found 374.1526.

**(Z)-N-(2-(4-Methoxyphenyl)-3-phenylallyl)-4-methylbenzenesulfonamide, 3n**

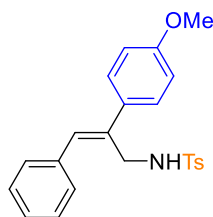

**3n**

Following GP3, using Pd(dba)<sub>2</sub> (20.1 mg, 0.03 mmol), 4-iodoanisole (180.0 mg, 0.77 mmol), THF (7.7 mL), **2c** (251.5 mg, 0.70 mmol) and KOH 3N (0.7 mL). Purification by silica column chromatography (hexanes:EtOAc 85:15) afforded **3n** as a white solid (106.0 mg, 38% yield). **M.p.:** 150 – 152 °C. **IR (ATR-FTIR)**  $\nu_{\text{max}}$ : 3238, 1604, 1515, 1324, 1158 cm<sup>-1</sup>. **<sup>1</sup>H-NMR (400 MHz, CDCl<sub>3</sub>)**  $\delta$ : 2.46 (s, 3H), 3.83 (s, 3H), 4.15 (d, *J* = 5.5 Hz, 2H), 4.41 (t, *J* = 5.5 Hz, 1H), 6.80 (s, 1H), 6.80 – 6.88 (m, 2H), 7.11 – 7.19 (m, 2H), 7.20 – 7.30 (m, 7H), 7.60 – 7.65 (m, 2H) ppm. **<sup>13</sup>C-NMR (101 MHz, CDCl<sub>3</sub>)**  $\delta$ : 21.6, 42.3, 55.3, 114.2, 127.3, 127.3, 127.6, 128.5, 128.4, 129.6, 130.6, 131.6, 134.9, 136.2, 136.4, 143.4, 159.6 ppm. **HRMS (ESI):** calc for [C<sub>23</sub>H<sub>24</sub>NO<sub>3</sub>S+H]<sup>+</sup>: 394.1471, found 394.1471.

**(Z)-N-(2-(4-Chlorophenyl)-3-phenylallyl)-4-methylbenzenesulfonamide, 3o**

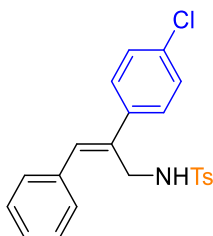

**3o**

Following GP3, using Pd(dba)<sub>2</sub> (20.1 mg, 0.03 mmol), 1-chloro-4-iodobenzene (184.0 mg, 0.77 mmol), THF (7.7 mL), **2c** (251.5 mg, 0.70 mmol) and KOH 3N (0.7 mL). Purification by silica column chromatography (hexanes:EtOAc 85:15) afforded **3o** as a white solid (94.0 mg, 34% yield). **M.p.:** 162 – 165 °C. **IR (ATR-FTIR)**  $\nu_{\text{max}}$ : 3250, 1490, 1417, 1330, 1320, 1156 cm<sup>-1</sup>. **<sup>1</sup>H-NMR (400 MHz, CDCl<sub>3</sub>)**  $\delta$ : 2.39 (s, 3H), 4.07 (d, *J* = 5.5 Hz, 2H), 4.31 (t, *J* = 5.7 Hz, 1H), 6.78 (s, 1H), 7.06 – 7.11 (m, 2H), 7.10 – 7.24 (m, 9H), 7.53 (d, *J* = 8.2 Hz, 2H) ppm. **<sup>13</sup>C-NMR (101 MHz, CDCl<sub>3</sub>)**  $\delta$ : 21.6, 42.3, 127.2, 127.7, 127.7, 128.5, 128.6, 128.8, 129.6, 132.7, 133.9, 134.6, 135.9, 136.1, 137.9, 143.6 ppm. **HRMS (ESI):** calc for [C<sub>22</sub>H<sub>21</sub>ClNO<sub>2</sub>S+H]<sup>+</sup>: 398.0976, found 398.0973.

### (Z)-4-Methyl-N-(3-phenyl-2-(o-tolyl)allyl)benzenesulfonamide, **3p**

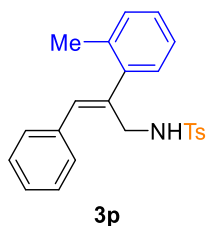

Following GP3, using Pd(dba)<sub>2</sub> (20.1 mg, 0.03 mmol), 1-iodo-2-methylbenzene (168.0 mg, 0.77 mmol), THF (7.7 mL), **2c** (251.5 mg, 0.70 mmol) and KOH 3N (0.7 mL). Purification by silica column chromatography (hexanes:EtOAc 85:15) afforded **3p** as a white solid (120.0 mg, 46% yield). **M.p.:** 131 – 133 °C. **IR (ATR-FTIR)**  $\nu_{\text{max}}$ : 3256, 1413, 1327, 1161 cm<sup>-1</sup>. **<sup>1</sup>H-NMR (400 MHz, CDCl<sub>3</sub>)**  $\delta$ : 2.22 (s, 3H), 2.41 (s, 3H), 4.07 (dd, *J* = 5.8, 1.8 Hz, 2H), 4.24 – 4.36 (m, 1H), 6.49 (s, 1H), 6.97 (dd, *J* = 7.4, 1.5 Hz, 1H), 7.09 – 7.22 (m, 7H), 7.27 – 7.34 (m, 3H), 7.50 (d, *J* = 8.3 Hz, 2H) ppm. **<sup>13</sup>C-NMR (101 MHz, CDCl<sub>3</sub>)**  $\delta$ : 19.9, 21.5, 43.8, 126.0, 127.2, 127.50, 127.8, 128.5, 128.6, 129.0, 129.6, 130.6, 133.4, 135.6, 136.0, 136.2, 136.6, 139.8, 143.3 ppm. **HRMS (ESI):** calc for [C<sub>23</sub>H<sub>24</sub>NO<sub>2</sub>S+H]<sup>+</sup>: 378.1522, found 378.1522.

## 2.2 Preparation of Ir catalysts

### 2.2.1 Preparation of aminophosphines **7**

The general strategy for the preparation of (*R<sub>p</sub>*)- and (*S<sub>p</sub>*)-**7** is the following:

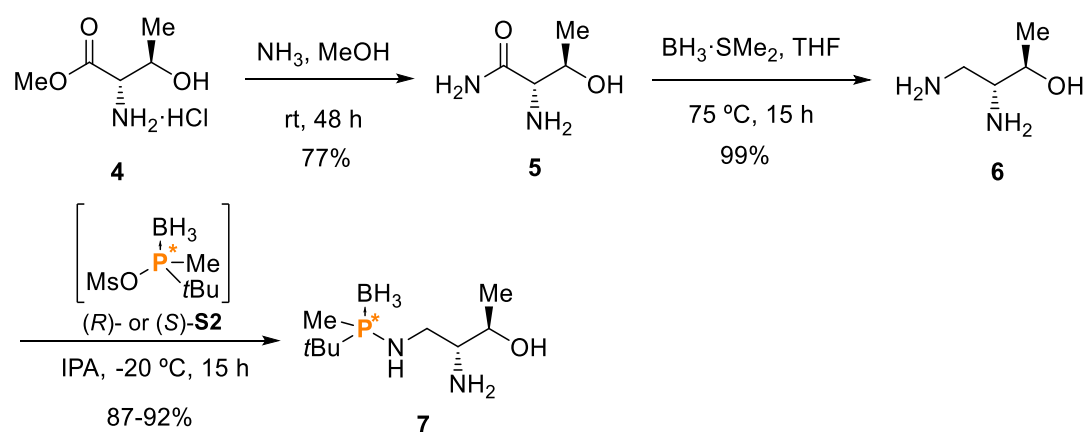

tert-Butylmethyl phosphinous mesylate **S2** was generated *in situ* from the corresponding phosphinous acid salt **S3**, following a procedure developed by our group.<sup>9</sup> Preparation of **S3** was performed as previously described by our group.<sup>9-11</sup> The following Scheme exemplifies the synthesis of (*S*)-**S3**:



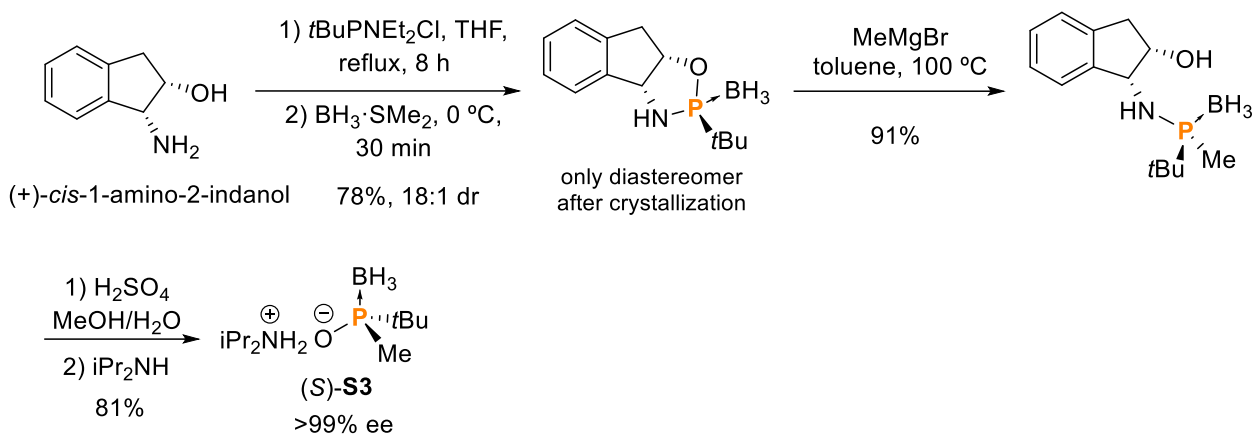

### Synthesis of (2*S*,3*R*)-2-amino-3-hydroxybutanamide, **5**

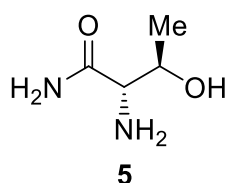

Commercial L-threonine methyl ester hydrochloride **4** (6.59 g, 36.91 mmol) was dissolved in 235 mL of MeOH in a 500 mL round-bottom flask. The solution was then cooled down to 0 °C and ammonia was bubbled into the solution for 1.5 h. Then, the ice bath was removed and the solution was allowed to expel the excess of ammonia through a bubbler. The bubbler was exchanged for a nitrogen balloon and the solution was left to stir at room temperature for 48 h. The completion of the reaction was controlled by <sup>1</sup>H-NMR. After that, the solution was concentrated under vacuum using a rotary evaporator placed inside a fumehood. The crude was purified by silica column chromatography (DCM:MeOH:NH<sub>3(aq.)</sub> 75:25:5, equilibrated with DCM:Et<sub>3</sub>N 98:2), obtaining **5** as a white solid (3.37g, 77% yield). **M.p.**: 111 – 113 °C. [ $\alpha$ ]<sub>D</sub>: -14.1 (c 1.01, CHCl<sub>3</sub>). **IR (ATR-FTIR)**  $\nu_{\text{max}}$ : 3341, 3302, 3182, 2976, 2909, 2848, 2735, 1667, 1584 cm<sup>-1</sup>. **<sup>1</sup>H-NMR (400 MHz, D<sub>2</sub>O)**  $\delta$ : 1.23 (d, *J* = 6.5 Hz, 3H), 3.32 (d, *J* = 4.5 Hz, 1H), 4.04 (qd, *J* = 6.5, 4.5 Hz, 1H). **<sup>13</sup>C-NMR (101 MHz, D<sub>2</sub>O)**  $\delta$ : 18.4 (s, CH<sub>3</sub>), 59.6 (s, CH), 68.6 (s, CH), 178.1 (s, Cq). **HRMS (ESI)**: calc for [C<sub>4</sub>H<sub>10</sub>N<sub>2</sub>O<sub>2</sub>+H]<sup>+</sup>: 119.0815, found 119.0813.

### Synthesis of (2*R*,3*R*)-3,4-diaminobutan-2-ol, **6**

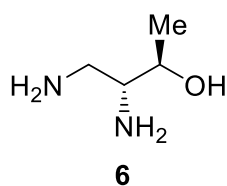

A 250 mL two-neck round-bottom flask was charged with **5** (3.30 g, 24.30 mmol) and dissolved in anhydrous THF (51 mL). The solution was cooled down to 0 °C and BH<sub>3</sub>·SMe<sub>2</sub> (9.2 mL, 97.21 mmol) was slowly added. The cooling bath was removed and the reaction was heated at 75 °C in an oil bath for 15 h. After that, the solution was cooled down to 0 °C and HCl 6N (18 mL) was added and left to stir until no bubbling was observed. Then, the aqueous solution was evaporated, HCl 6N (18 mL) was added again and the solution was heated at 110 °C in an oil bath for 1 h. The reaction mixture was then filtered, washed twice with DCM and the pH was adjusted to 14 using NaOH pellets. Next, the aqueous phase was evaporated, the residue was dissolved in IPA and the remaining solid was filtered. The solution was evaporated and the solid was washed with hexane to further eliminate the remaining IPA, yielding **6** as a brown oil (2.51 g, 99% yield). [ $\alpha$ ]<sub>D</sub>: + 1.0 (c 1.02, CHCl<sub>3</sub>). IR (ATR-FTIR)  $\nu_{\text{max}}$ : 3348, 3271, 3179, 2962, 2916, 2867 cm<sup>-1</sup>. <sup>1</sup>H-NMR (400 MHz, D<sub>2</sub>O)  $\delta$ : 1.19 (d, *J* = 6.5 Hz, 3H), 2.52 (dd, *J* = 12.5, 7.9 Hz, 1H), 2.55 – 2.64 (m, 1H), 2.75 (dd, *J* = 12.5, 4.1 Hz, 1H) 3.75 (qu, *J* = 6.4 Hz, 1H) ppm. <sup>13</sup>C-NMR (101 MHz, D<sub>2</sub>O)  $\delta$ : 18.5 (s, CH<sub>3</sub>), 43.3 (s, CH<sub>2</sub>), 57.6 (s, CH), 68.8 (s, CH) ppm. HRMS (ESI): calc for [C<sub>4</sub>H<sub>12</sub>N<sub>2</sub>O+H]<sup>+</sup>: 105.1022, found 105.1025.

#### Synthesis of aminophosphine (*R<sub>P</sub>*)-**7**

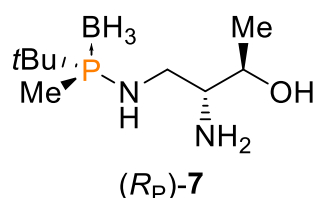

A solution of methanesulfonic anhydride (1.13 g, 6.32 mmol) in DCM (17 mL) was prepared in a flame-dried 100 mL round-bottom flask and cooled down to -20 °C. Then, phosphinous acid salt (*S*)-**S3** (1.11 g, 6.02 mmol) was dissolved in DCM (3.7 mL) and slowly added to the first solution (for more information regarding the preparation of **S3**, see p. S15). Triethylamine (1.68 mL, 12.05 mmol) was then added dropwise to the mixture and the reaction was stirred at -20 °C for 1.5 h. Afterwards, a solution of **6** (1.35 g, 12.05 mmol) in IPA (9 mL) was slowly added and the reaction was left to stir at the same temperature for 15 h. After that time, NaOH 1M was added and the reaction was allowed to warm up to room temperature. The solution was diluted with DCM, the organic layer was separated and the aqueous phase was extracted twice with DCM. The combined extracts were dried over MgSO<sub>4</sub>, filtered and concentrated under vacuum, obtaining (*R<sub>P</sub>*)-**7** as a brown oil without need of further purification (1.22 g, 92% yield, 98:2 d.r.). [ $\alpha$ ]<sub>D</sub>: + 0.7 (c 0.87,

CHCl<sub>3</sub>). IR (ATR-FTIR)  $\nu_{\max}$ : 3345, 2968, 2927, 2869, 2379, 1586 cm<sup>-1</sup>. <sup>1</sup>H-NMR (400 MHz, CDCl<sub>3</sub>)  $\delta$ : 0.03 – 0.91 (m, BH<sub>3</sub>), 1.13 (d,  $J_P$  = 14.0 Hz, 9H), 1.21 (d,  $J$  = 6.3 Hz, 3H), 1.33 (d,  $J_P$  = 9.1 Hz, 3H), 1.83 (br s, 3H), 1.95 (s, 1H), 2.58 (dt,  $J$  = 7.0, 4.7 Hz, 1H), 2.85 – 2.93 (m, 1H), 3.12 – 3.25 (m, 1H), 3.61 – 3.70 (m, 1H) ppm. <sup>13</sup>C-NMR (101 MHz, CDCl<sub>3</sub>)  $\delta$ : 9.7 (d,  $J_P$  = 39.9 Hz, CH<sub>3</sub>), 20.6 (s, CH<sub>3</sub>), 24.9 (d,  $J_P$  = 3.0 Hz, 3xCH<sub>3</sub>), 31.5 (d,  $J_P$  = 38.0 Hz, C<sub>q</sub>), 47.1 (s, CH<sub>2</sub>), 58.0 (s, CH), 68.1 (s, CH). <sup>31</sup>P-NMR (162 MHz, CDCl<sub>3</sub>)  $\delta$ : 70.4 – 72.3 (m) ppm. HRMS (ESI): calc for [C<sub>9</sub>H<sub>26</sub>BN<sub>2</sub>OP+H]<sup>+</sup>: 221.1950, found 221.1952.

### Synthesis of aminophosphine (S<sub>P</sub>)-7

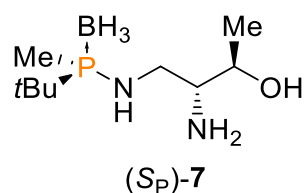

The reaction was performed following the experimental procedure described above and using methanesulfonic anhydride (1.97 g, 10.96 mmol) in DCM (27.5 mL), (R)-**S2** (1.92 g, 10.44 mmol) in DCM (6.5 mL), triethylamine (2.91 mL, 20.88 mmol) and **4** (2.50 g, 20.88 mmol) in IPA (15.2 mL), obtaining (S<sub>P</sub>)-**7** as a brown solid without need of further purification (2.00 g, 87% yield, 98:2 d.r.). **M.p.**: 68 – 70 °C. [ $\alpha$ ]<sub>D</sub>: + 15.9 (c 1.02, CHCl<sub>3</sub>). IR (ATR-FTIR)  $\nu_{\max}$ : 3338, 2970, 2902, 2869, 2364, 2339, 1585 cm<sup>-1</sup>. <sup>1</sup>H-NMR (400 MHz, CDCl<sub>3</sub>)  $\delta$ : 0.05 – 0.88 (m, BH<sub>3</sub>), 1.14 (d,  $J_P$  = 13.9 Hz, 9H), 1.20 (d,  $J$  = 6.3 Hz, 3H), 1.32 (d,  $J_P$  = 9.0 Hz, 3H), 1.89 (br s, 1H), 2.57 (dt,  $J$  = 7.3, 4.8 Hz, 1H), 2.94 (dq,  $J$  = 13.0, 7.3 Hz, 1H), 3.04 – 3.15 (m, 1H), 3.58 – 3.67 (m, 1H). <sup>13</sup>C-NMR (101 MHz, CDCl<sub>3</sub>)  $\delta$ : 9.7 (d,  $J_P$  = 39.3 Hz, CH<sub>3</sub>), 21.0 (s, CH<sub>3</sub>), 24.9 (d,  $J_P$  = 3.1 Hz, 3xCH<sub>3</sub>), 31.3 (d,  $J_P$  = 38.5 Hz, C<sub>q</sub>), 47.4 (s, CH<sub>2</sub>), 58.2 (d,  $J_P$  = 5.3 Hz, CH), 68.0 (s, CH) ppm. <sup>31</sup>P-NMR (162 MHz, CDCl<sub>3</sub>)  $\delta$ : 70.7 – 72.5 (m) ppm. HRMS (ESI): calc for [C<sub>9</sub>H<sub>26</sub>BN<sub>2</sub>OP+H]<sup>+</sup>: 221.1950, found 221.1948.

### 2.2.2 Preparation of ligands 9a-f

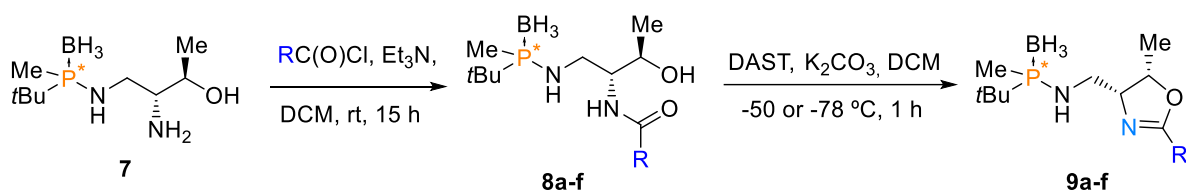

### General procedure for the preparation of ligands 9a-f (GP4):

To a solution of **7** (1 eq.) in DCM under inert atmosphere, triethylamine (2 eq.) was slowly added. The solution was then cooled down to 0 °C and the corresponding acid chloride (1 eq.) was added dropwise (if solid, dissolved in DCM). The reaction was left to stir at room temperature for 15 h. Then, HCl 1M was added to the solution, the organic layer was separated and the aqueous phase was extracted twice with DCM. The combined extracts were dried over MgSO<sub>4</sub>, filtered and concentrated under vacuum, obtaining intermediate **8** without need of further purification. Consecutively, an oven-dried round-bottom flask was charged with **8** (1 eq.), anhydrous K<sub>2</sub>CO<sub>3</sub> (4 eq.) and dissolved in DCM. This solution was cooled down to -50 or -78 °C (depending on the solubility of **8** in DCM), another solution of DAST (2 eq.) in DCM was slowly added and the reaction was stirred at the same temperature for 1 h. Then, saturated aqueous NaHCO<sub>3</sub> was added, the mixture was warmed up to room temperature, the organic layer was separated and the aqueous phase was extracted twice with DCM. The combined extracts were dried over MgSO<sub>4</sub>, filtered and concentrated under vacuum. The crude was purified by silica column chromatography using hexanes:EtOAc as eluent, affording the desired product **9**.

### Synthesis of (*R<sub>P</sub>*)-**9a**

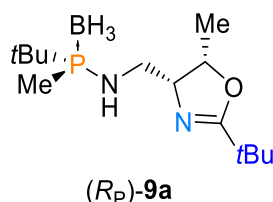

Following GP4, using (*R<sub>P</sub>*)-**7** (175.0 mg, 0.76 mmol), DCM (5.7 mL), Et<sub>3</sub>N (0.21 mL, 1.53 mmol) and pivaloyl chloride (94 μL, 0.76 mmol) afforded intermediate (*R<sub>P</sub>*)-**8a** as a colourless oil (211.3 mg, 91% yield). <sup>1</sup>H-NMR (400 MHz, CDCl<sub>3</sub>) δ: 0.06 – 0.91 (m, BH<sub>3</sub>), 1.10 (d, *J* = 14.0 Hz, 9H), 1.16 (d, *J* = 6.5 Hz, 3H), 1.22 (s, 9H), 1.33 (d, *J* = 9.2 Hz, 3H), 1.93 (br s, 1H), 2.67 (br s, 1H), 3.02 (dq, *J* = 13.3, 5.1 Hz, 1H), 3.16 (dq, *J* = 13.3, 9.4 Hz, 1H), 3.56 – 3.70 (m, 1H), 4.19 (q, *J* = 6.6 Hz, 1H), 6.13 (d, *J* = 8.5 Hz, 1H) ppm.

Consecutively, following GP4, (*R<sub>P</sub>*)-**8a** (211.3 mg, 0.69 mmol), K<sub>2</sub>CO<sub>3</sub> (384.0 mg, 2.78 mmol), DCM (8.7 mL) and DAST (236.0 mg, 1.39 mmol) were used. Purification by silica column chromatography (hexanes:EtOAc 7:3) afforded (*R<sub>P</sub>*)-**9a** as a colourless oil (141.5 mg, 71% yield). [α]<sub>D</sub>: + 62.7 (c 0.76, CHCl<sub>3</sub>). IR (ATR-FTIR) ν<sub>max</sub>: 3345, 2972, 2906, 2870, 2381, 2348, 1658, 1645 cm<sup>-1</sup>. <sup>1</sup>H-NMR (400 MHz, CDCl<sub>3</sub>) δ: 0.02 – 0.81 (m, BH<sub>3</sub>), 1.12 (d, *J<sub>P</sub>* = 13.9 Hz, 9H), 1.20 (s, 9H),

1.27 (d,  $J = 6.6$  Hz, 3H), 1.32 (d,  $J_P = 9.1$  Hz, 3H), 2.02 (br s, 1H), 2.83 – 2.95 (m, 1H), 3.18 – 3.30 (m, 1H), 3.91 – 4.05 (m, 1H), 4.66 (dq,  $J = 9.4, 6.6$  Hz, 1H) ppm.  $^{13}\text{C-NMR}$  (101 MHz,  $\text{CDCl}_3$ )  $\delta$ : 10.1 (d,  $J_P = 39.8$  Hz,  $\text{CH}_3$ ), 14.7 (s,  $\text{CH}_3$ ), 24.8 (d,  $J_P = 3.0$  Hz,  $3\times\text{CH}_3$ ), 27.9 (s,  $3\times\text{CH}_3$ ), 31.4 (d,  $J_P = 38.8$  Hz, Cq), 33.4 (s, Cq), 44.1 (s,  $\text{CH}_2$ ), 69.0 (d,  $J_P = 6.3$  Hz, CH), 78.2 (s, CH), 175.5 (s, Cq) ppm.  $^{31}\text{P-NMR}$  (162 MHz,  $\text{CDCl}_3$ )  $\delta$ : 70.3 (q,  $J_B = 62.4$  Hz) ppm. HRMS (ESI): calc for  $[\text{C}_{14}\text{H}_{32}\text{BN}_2\text{OP}+\text{H}]^+$ : 287.2418, found 287.2423.

### Synthesis of ( $S_P$ )-9a

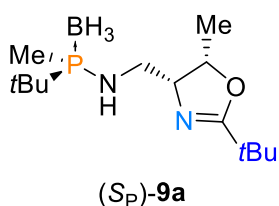

Following GP4, using ( $S_P$ )-7 (100.0 mg, 0.45 mmol), DCM (4 mL),  $\text{Et}_3\text{N}$  (0.13 mL, 0.91 mmol) and pivaloyl chloride (56  $\mu\text{L}$ , 0.45 mmol) afforded intermediate ( $S_P$ )-8a as a white solid (138.1 mg, 99% yield).  $^1\text{H-NMR}$  (400 MHz,  $\text{CDCl}_3$ )  $\delta$ : 0.07 – 0.91 (m,  $\text{BH}_3$ ), 1.13 (d,  $J = 14.0$  Hz, 9H), 1.17 (d,  $J = 6.4$  Hz, 3H), 1.23 (s, 9H), 1.27 (d,  $J = 9.1$  Hz, 3H), 1.93 (br s, 1H), 2.44 (d,  $J = 4.5$  Hz, 1H), 3.09 – 3.19 (m, 2H), 3.67 – 3.77 (m, 1H), 4.09 (br s, 1H), 6.15 (d,  $J = 8.2$  Hz, 1H) ppm.

Consecutively, following GP4, ( $S_P$ )-8a (133.9 mg, 0.44 mmol),  $\text{K}_2\text{CO}_3$  (243.3 mg, 1.76 mmol), DCM (5.4 mL) and DAST (141.9 mg, 0.88 mmol) were used. Purification by silica column chromatography (hexanes:EtOAc 7:3) afforded ( $S_P$ )-9a as a white solid (108.7 mg, 86% yield). **M.p.**: 79 – 82 °C.  $[\alpha]_D^{25}$ : +94.6 (c 0.96,  $\text{CHCl}_3$ ). IR (ATR-FTIR)  $\nu_{\text{max}}$ : 3360, 2973, 2904, 2871, 2363, 2338, 1655  $\text{cm}^{-1}$ .  $^1\text{H-NMR}$  (400 MHz,  $\text{CDCl}_3$ )  $\delta$ : 0.07 – 0.88 (m,  $\text{BH}_3$ ), 1.13 (d,  $J_P = 14.0$  Hz, 9H), 1.20 (s, 9H), 1.28 (d,  $J = 6.6$  Hz, 3H), 1.30 (d,  $J_P = 8.9$  Hz, 3H), 1.91 (br s, 1H), 2.92 – 3.05 (m, 1H), 3.08 – 3.19 (m, 1H), 3.93 – 4.04 (m, 1H), 4.57 – 4.75 (m, 1H) ppm.  $^{13}\text{C-NMR}$  (101 MHz,  $\text{CDCl}_3$ )  $\delta$ : 9.6 (d,  $J_P = 38.2$  Hz,  $\text{CH}_3$ ), 14.8 (s,  $\text{CH}_3$ ), 24.8 (s,  $3\times\text{CH}_3$ ), 27.9 (s,  $3\times\text{CH}_3$ ), 31.1 (d,  $J_P = 39.9$  Hz, Cq), 33.3 (s, Cq), 43.7 (s,  $\text{CH}_2$ ), 68.5 (d,  $J_P = 6.9$  Hz, CH), 77.9 (s, CH), 174.8 (s, Cq) ppm.  $^{31}\text{P-NMR}$  (162 MHz,  $\text{CDCl}_3$ )  $\delta$ : 70.1 (q,  $J_B = 62.4$  Hz) ppm. HRMS (ESI): calc for  $[\text{C}_{14}\text{H}_{32}\text{BN}_2\text{OP}+\text{H}]^+$ : 287.2418, found 287.2420.

### Synthesis of (*R<sub>P</sub>*)-**9b**

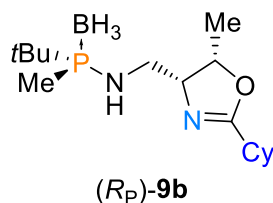

Following GP4, using (*R<sub>P</sub>*)-**7** (125.0 mg, 0.54 mmol), DCM (4.3 mL), Et<sub>3</sub>N (0.15 mL, 1.09 mmol) and cyclohexanecarbonyl chloride (74  $\mu$ L, 0.54 mmol) afforded intermediate (*R<sub>P</sub>*)-**8b** as a colourless oil (179.1 mg, 99% yield). **<sup>1</sup>H-NMR (400 MHz, CDCl<sub>3</sub>)  $\delta$ :** 0.06 – 0.92 (m, BH<sub>3</sub>), 1.10 (d,  $J = 14.0$  Hz, 9H), 1.16 (d,  $J = 6.6$  Hz, 3H), 1.21 – 1.29 (m, 1H), 1.32 (d,  $J = 9.2$  Hz, 3H), 1.37 – 1.97 (m, 10H), 2.06 – 2.18 (m, 1H), 2.73 (d,  $J = 4.8$  Hz, 1H), 2.92 – 3.08 (m, 1H), 3.08 – 3.25 (m, 1H), 3.52 – 3.70 (m, 1H), 4.18 (br s, 1H), 5.93 (d,  $J = 8.7$  Hz, 1H) ppm.

Consecutively, following GP4, (*R<sub>P</sub>*)-**8b** (180.1 mg, 0.54 mmol), K<sub>2</sub>CO<sub>3</sub> (305.5 mg, 2.21 mmol), DCM (6.8 mL) and DAST (185.0 mg, 1.09 mmol) were used. Purification by silica column chromatography (hexanes:EtOAc 8:2) afforded (*R<sub>P</sub>*)-**9b** as a colourless oil (111.9 mg, 66% yield).  $[\alpha]_D^{25}$ : +73.5 (c 1.12, CHCl<sub>3</sub>). **IR (ATR-FTIR)  $\nu_{\max}$ :** 3332, 2971, 2930, 2855, 2372, 2261, 1731, 1641 cm<sup>-1</sup>. **<sup>1</sup>H-NMR (400 MHz, CDCl<sub>3</sub>)  $\delta$ :** 0.03 – 0.92 (m, BH<sub>3</sub>), 1.10 (d,  $J_P = 13.9$  Hz, 9H), 1.20 – 1.46 (m, 4H), 1.24 (d,  $J = 6.7$  Hz, 3H), 1.31 (d,  $J_P = 9.2$  Hz, 3H), 1.33 – 1.46 (m, 1H), 1.61 – 1.70 (m, 2H), 1.71 – 1.80 (m, 2H), 1.83 – 1.92 (m, 2H), 2.10 (d,  $J = 9.2$  Hz, 1H), 2.26 (tt,  $J = 11.4, 3.5$  Hz, 1H), 2.77 – 2.92 (m, 1H), 3.17 – 3.31 (m, 1H), 3.96 (td,  $J = 9.1, 4.1$  Hz, 1H), 4.65 (dq,  $J = 9.4, 6.7$  Hz, 1H) ppm. **<sup>13</sup>C-NMR (101 MHz, CDCl<sub>3</sub>)  $\delta$ :** 10.2 (d,  $J_P = 39.8$  Hz, CH<sub>3</sub>), 14.8 (s, CH<sub>3</sub>), 24.8 (d,  $J_P = 3.0$  Hz, 3xCH<sub>3</sub>), 25.7 (s, 2xCH<sub>2</sub>), 25.9 (s, CH<sub>2</sub>), 28.0 (s, CH<sub>2</sub>), 28.0 (s, CH<sub>2</sub>), 31.4 (d,  $J_P = 38.8$  Hz, Cq), 37.8 (s, CH), 44.3 (s, CH<sub>2</sub>), 69.1 (d,  $J = 5.9$  Hz, CH), 77.6 (s, CH), 171.9 (s, Cq) ppm. **<sup>31</sup>P-NMR (162 MHz, CDCl<sub>3</sub>)  $\delta$ :** 69.3 – 71.5 (m) ppm. **HRMS (ESI):** calc for [C<sub>16</sub>H<sub>34</sub>BN<sub>2</sub>OP+H]<sup>+</sup>: 313.2574, found 313.2583.

### Synthesis of (*S<sub>P</sub>*)-**9b**

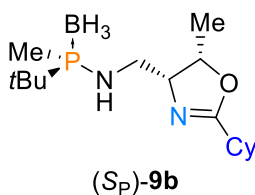

Following GP4, using (*S<sub>P</sub>*)-**7** (125.0 mg, 0.57 mmol), DCM (4.3 mL), Et<sub>3</sub>N (0.16 mL, 1.14 mmol) and cyclohexanecarbonyl chloride (78  $\mu$ L, 0.57 mmol) afforded intermediate (*S<sub>P</sub>*)-**8b** as a

colourless oil (175.8 mg, 93% yield). **<sup>1</sup>H-NMR (400 MHz, CDCl<sub>3</sub>) δ**: 0.10 – 0.87 (m, 3H), 1.13 (d, *J* = 14.0 Hz, 9H), 1.17 (d, *J* = 6.4 Hz, 3H), 1.27 (d, *J* = 9.0 Hz, 3H), 1.29 – 1.33 (m, 2H), 1.39 – 1.51 (m, 2H), 1.63 – 1.72 (m, 1H), 1.75 – 1.94 (m, 5H), 2.16 (tt, *J* = 11.7, 3.5 Hz, 1H), 2.45 (d, *J* = 4.8 Hz, 1H), 3.14 (q, *J* = 7.0 Hz, 2H), 3.63 – 3.76 (m, 1H), 4.07 (br s, 1H), 5.96 (d, *J* = 8.6 Hz, 1H) ppm. Consecutively, following GP4, (*S<sub>P</sub>*)-**8b** (174.8 mg, 0.53 mmol), K<sub>2</sub>CO<sub>3</sub> (293.0 mg, 2.12 mmol), DCM (6.5 mL) and DAST (180.0 mg, 1.06 mmol) were used. Purification by silica column chromatography (hexanes:EtOAc 8:2) afforded (*S<sub>P</sub>*)-**9b** as a colourless oil (89.1 mg, 54% yield). [ $\alpha$ ]<sub>D</sub>: +61.4 (c 1.27, CHCl<sub>3</sub>). **IR (ATR-FTIR)**  $\nu_{\text{max}}$ : 3360, 2973, 2904, 2871, 2363, 2338, 2265, 1655 cm<sup>-1</sup>. **<sup>1</sup>H-NMR (400 MHz, CDCl<sub>3</sub>) δ**: 0.02 – 0.89 (m, BH<sub>3</sub>), 1.12 (d, *J<sub>P</sub>* = 14.0 Hz, 9H), 1.20 – 1.47 (m, 4H), 1.25 (d, *J* = 6.6 Hz, 3H), 1.28 (d, *J<sub>P</sub>* = 9.0 Hz, 3H), 1.61 – 1.68 (m, 1H), 1.69 – 1.80 (m, 2H), 1.82 – 1.92 (m, 2H), 1.93 – 2.01 (m, 1H), 2.11 (br s, 1H), 2.26 (tt, *J* = 11.4, 3.6 Hz, 1H), 2.89 – 3.02 (m, 1H), 3.05 – 3.23 (m, 1H), 3.97 (td, *J* = 8.9, 4.3 Hz, 1H), 4.64 (dq, *J* = 9.4, 6.6 Hz, 1H) ppm. **<sup>13</sup>C-NMR (101 MHz, CDCl<sub>3</sub>) δ**: 9.7 (d, *J<sub>P</sub>* = 37.9 Hz, CH<sub>3</sub>), 14.8 (s, CH<sub>3</sub>), 24.8 (d, *J<sub>P</sub>* = 3.1 Hz, 3xCH<sub>3</sub>), 25.7 (s, 2xCH<sub>2</sub>), 25.9 (s, CH<sub>2</sub>), 30.0 (d, *J<sub>P</sub>* = 2.0 Hz, CH<sub>2</sub>), 31.0 (d, *J<sub>P</sub>* = 40.4 Hz, Cq), 37.7 (s, CH), 43.8 (s, CH<sub>2</sub>), 68.6 (d, *J* = 6.9 Hz, CH), 77.6 (s, CH), 171.8 (s, Cq) ppm. **<sup>31</sup>P-NMR (162 MHz, CDCl<sub>3</sub>) δ**: 69.4 – 71.2 (m) ppm. **HRMS (ESI)**: calc for [C<sub>16</sub>H<sub>34</sub>BN<sub>2</sub>OP+H]<sup>+</sup>: 313.2574, found 313.2578.

### Synthesis of (*R<sub>P</sub>*)-**9c**

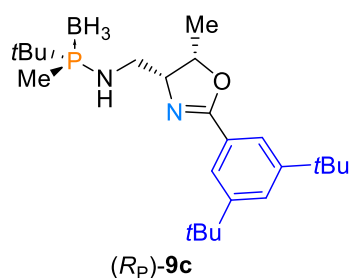

Initially, the corresponding acid chloride was prepared by adding oxalyl chloride (0.58 mL, 6.75 mmol) and one drop of DMF to a solution of 3,5-di-*tert*-butyl benzoic acid (318.7 mg, 1.36 mmol) in DCM (4.6 mL) at 0 °C. The solution was stirred at room temperature for 3 h and then evaporated and dried under vacuum for 2 h. Afterwards, following GP4, using (*R<sub>P</sub>*)-**7** (300.0 mg, 1.36 mmol), DCM (10.5 mL), Et<sub>3</sub>N (0.38 mL, 2.73 mmol) and 3,5-di-*tert*-butyl benzoyl chloride (342.9 mg, 1.36 mmol) afforded intermediate (*R<sub>P</sub>*)-**8c** as a white solid (472.4 mg, 79% yield). **<sup>1</sup>H-NMR (400 MHz, CDCl<sub>3</sub>) δ**: 0.09 – 0.79 (m, 3H), 1.10 (d, *J* = 14.0 Hz, 9H), 1.26 (d, *J* = 6.5 Hz, 3H), 1.35 (s, 18H), 1.35 (d, *J* = 9.2 Hz, 3H), 1.99 (br s, 1H), 2.79 (d, *J* = 4.7 Hz, 1H), 3.15 – 3.40 (m, 2H), 3.84 – 3.93

(m, 1H), 4.21 – 4.32 (m, 1H), 6.61 (d,  $J = 8.5$  Hz, 1H), 7.57 – 7.59 (m, 1H), 7.60 (d,  $J = 1.8$  Hz, 2H) ppm.

Consecutively, following GP4, ( $R_P$ )-**8c** (467.0 mg, 1.07 mmol),  $K_2CO_3$  (592.0 mg, 4.28 mmol), DCM (13.2 mL) and DAST (364.0 mg, 2.14 mmol) were used. Purification by silica column chromatography (hexanes:EtOAc 85:15) afforded ( $R_P$ )-**9c** as a white solid (350.0 mg, 78% yield). **M.p.:** 163 – 167 °C.  $[\alpha]_D^{25}$ : + 73.8 (c 0.95,  $CHCl_3$ ). **IR (ATR-FTIR)**  $\nu_{max}$ : 3343, 2962, 2905, 2868, 2382, 2348, 1642, 1593  $cm^{-1}$ .  **$^1H$ -NMR (400 MHz,  $CDCl_3$ )  $\delta$ :** 0.09 – 0.81 (m,  $BH_3$ ), 1.13 (d,  $J_P = 13.9$  Hz, 9H), 1.35 (s, 18H), 1.38 (d,  $J = 6.4$  Hz, 3H), 1.39 (d,  $J_P = 6.8$  Hz, 3H), 2.22 (d,  $J = 9.2$  Hz, 1H), 2.94 – 3.03 (m, 1H), 3.30 – 3.41 (m, 1H), 4.21 (td,  $J = 9.3, 4.2$  Hz, 1H), 4.88 (dq,  $J = 9.5, 6.6$  Hz, 1H), 7.56 (t,  $J = 1.9$  Hz, 1H), 7.78 (d,  $J = 1.9$  Hz, 2H) ppm.  **$^{13}C$ -NMR (101 MHz,  $CDCl_3$ )  $\delta$ :** 10.3 (d,  $J_P = 40.4$  Hz,  $CH_3$ ), 14.9 (s,  $CH_3$ ), 24.8 (d,  $J_P = 3.0$  Hz,  $3 \times CH_3$ ), 31.5 (d,  $J_P = 38.3$  Hz, Cq), 31.5 (s,  $6 \times CH_3$ ), 35.1 (s,  $2 \times Cq$ ), 44.5 (s,  $CH_2$ ), 70.0 (d,  $J_P = 5.9$  Hz, CH), 78.1 (s, CH), 122.6 (s,  $2 \times CH$ ), 125.9 (s, CH), 127.2 (s, Cq), 151.1 (s,  $2 \times Cq$ ), 165.1 (s, Cq) ppm.  **$^{31}P$ -NMR (162 MHz,  $CDCl_3$ )  $\delta$ :** 69.4 – 71.4 (m) ppm. **HRMS (ESI):** calc for  $[C_{24}H_{44}BN_2OP+H]^+$ : 419.3357, found 419.3368.

### Synthesis of ( $S_P$ )-**9c**

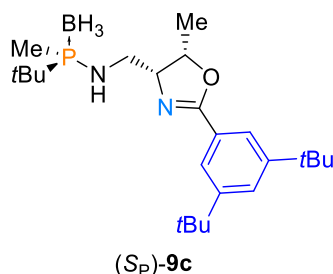

Initially, the corresponding acid chloride was prepared by adding oxalyl chloride (0.22 mL, 2.60 mmol) and one drop of DMF to a solution of 3,5-di-*tert*-butyl benzoic acid (121.8 mg, 0.52 mmol) in DCM (1.7 mL) at 0 °C. The solution was stirred at room temperature for 3 h and then evaporated and dried under vacuum for 2 h. Afterwards, following GP4, using ( $S_P$ )-**7** (115.0 mg, 0.52 mmol), DCM (4 mL),  $Et_3N$  (0.13 mL, 0.91 mmol) and 3,5-di-*tert*-butyl benzoyl chloride (131.0 mg, 0.52 mmol) afforded intermediate ( $S_P$ )-**8c** as a colourless oil (171.0 mg, 72% yield).  **$^1H$ -NMR (400 MHz,  $CDCl_3$ )  $\delta$ :** 0.12 – 0.81 (m, 3H), 1.13 (d,  $J = 14.1$  Hz, 9H), 1.23 (d,  $J = 9.0$  Hz, 3H), 1.26 (d,  $J = 6.4$  Hz, 3H), 1.35 (s, 18H), 1.95 (br s, 1H), 2.52 (br s, 1H), 3.22 – 3.41 (m, 2H), 3.94 – 4.05 (m, 1H), 4.10 – 4.20 (m, 1H), 6.68 (d,  $J = 8.5$  Hz, 1H), 7.59 (t,  $J = 1.8$  Hz, 1H), 7.66 (d,  $J = 1.8$  Hz, 2H) ppm.



Consecutively, following GP4, (*S<sub>P</sub>*)-**8c** (119.3 mg, 0.27 mmol), K<sub>2</sub>CO<sub>3</sub> (156.2 mg, 1.13 mmol), DCM (3.5 mL) and DAST (95.9 mg, 0.57 mmol) were used. Purification by silica column chromatography (hexanes:EtOAc 9:1) afforded (*S<sub>P</sub>*)-**9c** as a colourless oil (87.5 mg, 77% yield). [ $\alpha$ ]<sub>D</sub>: + 72.8 (c 1.25, CHCl<sub>3</sub>). IR (ATR-FTIR)  $\nu_{\text{max}}$ : 3352, 2962, 2869, 2378, 2263, 1643, 1592 cm<sup>-1</sup>. <sup>1</sup>H-NMR (400 MHz, CDCl<sub>3</sub>)  $\delta$ : 0.08 – 0.91 (m, BH<sub>3</sub>), 1.17 (d, *J<sub>P</sub>* = 14.0 Hz, 9H), 1.32 (d, *J<sub>P</sub>* = 9.1 Hz, 3H), 1.35 (s, 18H), 1.41 (d, *J* = 6.7 Hz, 3H), 2.10 (br s, 1H), 3.05 – 3.14 (m, 1H), 3.22 – 3.32 (m, 1H), 4.22 (td, *J* = 8.9, 4.3 Hz, 1H), 4.89 (dq, *J* = 9.6, 6.7 Hz, 1H), 7.56 (t, *J* = 1.6 Hz, 1H), 7.78 (d, *J* = 1.2 Hz, 2H) ppm. <sup>13</sup>C-NMR (101 MHz, CDCl<sub>3</sub>)  $\delta$ : 9.8 (d, *J<sub>P</sub>* = 37.8 Hz, CH<sub>3</sub>), 15.1 (s, CH<sub>3</sub>), 24.8 (d, *J<sub>P</sub>* = 2.9 Hz, 3xCH<sub>3</sub>), 31.1 (d, *J<sub>P</sub>* = 40.3 Hz, Cq), 31.5 (s, 6xCH<sub>3</sub>), 35.1 (s, 2xCq), 43.9 (s, CH<sub>2</sub>), 69.4 (d, *J<sub>P</sub>* = 6.9 Hz, CH), 78.1 (s, CH), 122.6 (s, 2xCH), 126.0 (s, CH), 127.2 (s, Cq), 151.1 (s, Cq), 165.0 (s, Cq) ppm. <sup>31</sup>P-NMR (162 MHz, CDCl<sub>3</sub>)  $\delta$ : 68.9 – 71.9 (m) ppm. HRMS (ESI): calc for [C<sub>24</sub>H<sub>44</sub>BN<sub>2</sub>OP+H]<sup>+</sup>: 419.3357, found 419.3366.

### Synthesis of (*R<sub>P</sub>*)-**9d**

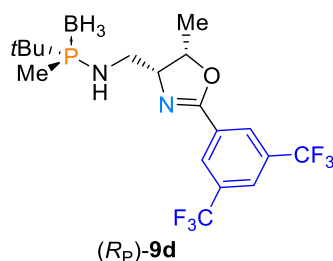

Following GP4, using (*R<sub>P</sub>*)-**7** (120.0 mg, 0.54 mmol), DCM (4.1 mL), Et<sub>3</sub>N (0.15 mL, 1.09 mmol) and 3,5-bis(trifluoromethyl)benzoyl chloride (102  $\mu$ L, 0.54 mmol) afforded intermediate (*R<sub>P</sub>*)-**8d** as a colourless oil (175.1 mg, 70% yield). <sup>1</sup>H-NMR (400 MHz, CDCl<sub>3</sub>)  $\delta$ : 0.13 – 0.84 (m, 3H), 1.11 (d, *J* = 14.1 Hz, 9H), 1.27 (d, *J* = 6.5 Hz, 3H), 1.36 (d, *J* = 9.2 Hz, 3H), 1.94 (br s, 1H), 3.15 – 3.25 (m, 1H), 3.25 – 3.38 (m, 1H), 3.83 – 3.99 (m, 1H), 4.26 – 4.39 (m, 1H), 6.78 (d, *J* = 8.5 Hz, 1H), 8.02 (s, 1H), 8.24 (s, 2H) ppm.

Consecutively, following GP4, (*R<sub>P</sub>*)-**8d** (172.6 mg, 0.38 mmol), K<sub>2</sub>CO<sub>3</sub> (207.3 mg, 1.50 mmol), DCM (4.7 mL) and DAST (128.0 mg, 0.75 mmol) were used. Purification by silica column chromatography (hexanes:EtOAc 9:1) afforded (*R<sub>P</sub>*)-**9d** as a colourless oil (75.5 mg, 46% yield). [ $\alpha$ ]<sub>D</sub>: + 86.4 (c 1.34, CHCl<sub>3</sub>). IR (ATR-FTIR)  $\nu_{\text{max}}$ : 3336, 2971, 2945, 2904, 2870, 2374, 1651 cm<sup>-1</sup>. <sup>1</sup>H-NMR (400 MHz, CDCl<sub>3</sub>)  $\delta$ : 0.07 – 0.92 (m, BH<sub>3</sub>), 1.14 (d, *J<sub>P</sub>* = 14.0 Hz, 9H), 1.38 (d, *J* = 3.6 Hz, 3H), 1.40 (d, *J<sub>P</sub>* = 5.9 Hz, 3H), 2.16 (d, *J* = 9.9 Hz, 1H), 2.89 – 3.06 (m, 1H), 3.35 – 3.51 (m, 1H), 4.28 (td, *J* = 9.7, 4.0 Hz, 1H), 4.99 (dq, *J* = 9.6, 6.7 Hz, 1H), 7.98 (s, 1H), 8.39 (s, 2H) ppm.

<sup>13</sup>C-NMR (101 MHz, CDCl<sub>3</sub>) δ: 10.5 (d, J<sub>P</sub> = 40.4 Hz, CH<sub>3</sub>), 15.0 (s, CH<sub>3</sub>), 24.8 (d, J<sub>P</sub> = 3.0 Hz, 3xCH<sub>3</sub>), 31.5 (d, J<sub>P</sub> = 38.6 Hz, Cq), 44.3 (d, J<sub>P</sub> = 2.1 Hz, CH<sub>2</sub>), 70.7 (d, J<sub>P</sub> = 5.1 Hz, CH), 79.2 (s, CH), 123.1 (q, J<sub>F</sub> = 272.9 Hz, 2xCF<sub>3</sub>), 124.7 – 125.1 (m, CH), 128.5 (d, J<sub>F</sub> = 3.8 Hz, 2xCH), 130.2 (s, Cq), 132.1 (q, J<sub>F</sub> = 34.0 Hz, 2xCq), 161.6 (s, Cq) ppm. <sup>31</sup>P-NMR (162 MHz, CDCl<sub>3</sub>) δ: 70.3 – 72.6 (m) ppm. HRMS (ESI): calc for [C<sub>18</sub>H<sub>26</sub>BF<sub>6</sub>N<sub>2</sub>OP+H]<sup>+</sup>: 443.1852, found 443.1860.

### Synthesis of (S<sub>P</sub>)-9d

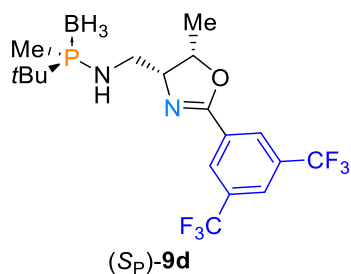

Following GP4, using (S<sub>P</sub>)-7 (125.0 mg, 0.57 mmol), DCM (4.3 mL), Et<sub>3</sub>N (0.16 mL, 1.14 mmol) and 3,5-bis(trifluoromethyl)benzoyl chloride (106 μL, 0.57 mmol) afforded intermediate (S<sub>P</sub>)-8d as a colourless oil (250.7 mg, 96% yield). <sup>1</sup>H-NMR (400 MHz, CDCl<sub>3</sub>) δ: 0.10 – 0.83 (m, 3H), 1.15 (d, J = 14.1 Hz, 9H), 1.23 (d, J = 9.0 Hz, 3H), 1.27 (d, J = 6.5 Hz, 3H), 3.25 – 3.33 (m, 2H), 3.93 – 4.09 (m, 1H), 4.18 – 4.26 (m, 1H), 6.85 (d, J = 8.5 Hz, 1H), 8.02 (s, 1H), 8.29 (s, 2H) ppm.

Consecutively, following GP4, (S<sub>P</sub>)-8d (248.9 mg, 0.54 mmol), K<sub>2</sub>CO<sub>3</sub> (299.0 mg, 2.16 mmol), DCM (6.8 mL) and DAST (174.0 mg, 1.08 mmol) were used. Purification by silica column chromatography (hexanes:EtOAc 9:1) afforded (S<sub>P</sub>)-9d as a colourless oil (121.6 mg, 51% yield).

[α]<sub>D</sub>: +101.4 (c 0.66, CHCl<sub>3</sub>). IR (ATR-FTIR) ν<sub>max</sub>: 3336, 2971, 2945, 2904, 2870, 2385, 1650 cm<sup>-1</sup>. <sup>1</sup>H-NMR (400 MHz, CDCl<sub>3</sub>) δ: 0.07 – 0.92 (m, BH<sub>3</sub>), 1.18 (d, J<sub>P</sub> = 14.1 Hz, 9H), 1.35 (d, J<sub>P</sub> = 9.0 Hz, 3H), 1.41 (d, J = 9.0 Hz, 3H), 2.04 (d, J = 9.2 Hz, 1H), 2.98 – 3.13 (m, 1H), 3.32 – 3.44 (m, 1H), 4.29 (td, J = 9.5, 4.3 Hz, 1H), 4.99 (dq, J = 9.7, 6.7 Hz, 1H), 7.99 (s, 1H), 8.39 (s, 2H) ppm. <sup>13</sup>C-NMR (101 MHz, CDCl<sub>3</sub>) δ: 10.1 (d, J<sub>P</sub> = 37.4 Hz, CH<sub>3</sub>), 15.1 (s, CH<sub>3</sub>), 24.8 (d, J<sub>P</sub> = 2.9 Hz, 3xCH<sub>3</sub>), 30.9 (d, J<sub>P</sub> = 40.9 Hz, Cq), 43.7 (s, CH<sub>2</sub>), 70.1 (d, J<sub>P</sub> = 6.3 Hz, CH), 79.2 (s, CH), 123.1 (q, J<sub>F</sub> = 273.6 Hz, 2xCF<sub>3</sub>), 124.7 – 125.1 (m, CH), 128.6 (d, J<sub>F</sub> = 3.0 Hz, 2xCH), 130.2 (s, Cq), 132.1 (q, J<sub>F</sub> = 33.9 Hz, 2xCq), 161.5 (s, Cq) ppm. <sup>31</sup>P-NMR (162 MHz, CDCl<sub>3</sub>) δ: 70.4 – 72.2 (m) ppm. HRMS (ESI): calc for [C<sub>18</sub>H<sub>26</sub>BF<sub>6</sub>N<sub>2</sub>OP+H]<sup>+</sup>: 443.1852, found 443.1864.

## Synthesis of (*R<sub>P</sub>*)-**9e**

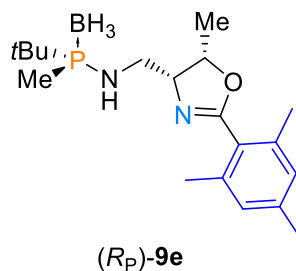

Following GP4, using (*R<sub>P</sub>*)-**7** (125.0 mg, 0.52 mmol), DCM (4.3 mL), Et<sub>3</sub>N (0.15 mL, 1.05 mmol) and 2,4,6-trimethylbenzoyl chloride (89 μL, 0.53 mmol) afforded intermediate (*R<sub>P</sub>*)-**8e** as a colourless oil (162.3 mg, 85% yield). <sup>1</sup>H-NMR (400 MHz, CDCl<sub>3</sub>) δ: 0.10 – 0.87 (m, 3H), 1.12 (d, *J* = 14.0 Hz, 9H), 1.27 (d, *J* = 6.5 Hz, 3H), 1.35 (d, *J* = 9.0 Hz, 3H), 1.98 (s, 1H), 2.27 (s, 3H), 2.29 (s, 6H), 3.14 – 3.34 (m, 2H), 3.75 – 3.90 (m, 1H), 4.29 (q, *J* = 6.6 Hz, 1H), 6.13 (d, *J* = 8.6 Hz, 1H), 6.83 (s, 2H) ppm.

Consecutively, following GP4, (*R<sub>P</sub>*)-**8e** (162.3 mg, 0.44 mmol), K<sub>2</sub>CO<sub>3</sub> (245.0 mg, 1.77 mmol), DCM (5.4 mL) and DAST (150.4 mg, 0.89 mmol) were used. Purification by silica column chromatography (hexanes:EtOAc 9:1) afforded (*R<sub>P</sub>*)-**9e** as a colourless oil (128.4 mg, 58% yield). [α]<sub>D</sub>: + 69.7 (c 0.65, CHCl<sub>3</sub>). IR (ATR-FTIR) ν<sub>max</sub>: 3350, 2927, 2867, 2382, 2348, 1660 cm<sup>-1</sup>. <sup>1</sup>H-NMR (400 MHz, CDCl<sub>3</sub>) δ: 0.08 – 0.91 (m, BH<sub>3</sub>), 1.12 (d, *J<sub>P</sub>* = 13.9 Hz, 9H), 1.34 (d, *J<sub>P</sub>* = 9.2 Hz, 3H), 1.37 (d, *J* = 6.7 Hz, 3H), 2.27 (s, 3H), 2.29 (s, 6H), 2.95 – 3.08 (m, 1H), 3.40 – 3.53 (m, 1H), 4.27 (td, *J* = 9.9, 3.8 Hz, 1H), 4.90 (dq, *J* = 9.7, 6.7 Hz, 1H), 6.86 (s, 2H) ppm. <sup>13</sup>C-NMR (101 MHz, CDCl<sub>3</sub>) δ: 10.6 (d, *J<sub>P</sub>* = 40.5 Hz, CH<sub>3</sub>), 14.9 (s, CH<sub>3</sub>), 19.6 (s, 2xCH<sub>3</sub>), 21.3 (s, CH<sub>3</sub>), 24.8 (s, 3xCH<sub>3</sub>), 31.5 (d, *J<sub>P</sub>* = 38.6 Hz, Cq), 44.8 (d, *J<sub>P</sub>* = 2.2 Hz, CH<sub>2</sub>), 70.4 (d, *J<sub>P</sub>* = 5.0 Hz, CH), 77.8 (s, CH), 125.9 (s, Cq), 128.4 (s, 2xCH), 136.7 (s, Cq), 139.6 (s, 2xCq), 165.2 (s, Cq) ppm. <sup>31</sup>P-NMR (162 MHz, CDCl<sub>3</sub>) δ: 70.1 – 71.9 (m) ppm. HRMS (ESI): calc for [C<sub>19</sub>H<sub>34</sub>BN<sub>2</sub>OP+H]<sup>+</sup>: 349.2574, found 349.2583.

## Synthesis of (*S<sub>P</sub>*)-**9e**

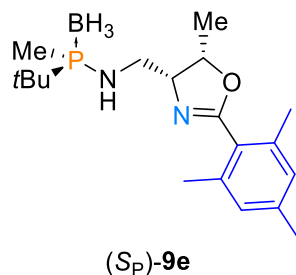

Following GP4, using (*S<sub>P</sub>*)-7 (125.0 mg, 0.57 mmol), DCM (4.3 mL), Et<sub>3</sub>N (0.16 mL, 1.14 mmol) and 2,4,6-trimethylbenzoyl chloride (96 μL, 0.57 mmol) afforded intermediate (*S<sub>P</sub>*)-8e as a colourless oil (193.2 mg, 93% yield). <sup>1</sup>H-NMR (400 MHz, CDCl<sub>3</sub>) δ: 0.03 – 0.85 (m, 3H), 1.16 (d, *J* = 14.1 Hz, 9H), 1.27 (d, *J* = 6.4 Hz, 3H), 1.29 (d, *J* = 8.8 Hz, 3H), 2.27 (s, 3H), 2.30 (s, 6H), 3.17 – 3.35 (m, 2H), 3.85 – 3.96 (m, 1H), 4.16 – 4.32 (m, 1H), 6.17 (d, *J* = 8.4 Hz, 1H), 6.84 (s, 2H) ppm. Consecutively, following GP4, (*S<sub>P</sub>*)-8e (192.0 mg, 0.52 mmol), K<sub>2</sub>CO<sub>3</sub> (290.0 mg, 2.10 mmol), DCM (6.3 mL) and DAST (178.0 mg, 1.05 mmol) were used. Purification by silica column chromatography (hexanes:EtOAc 8:2) afforded (*S<sub>P</sub>*)-9e as a colourless oil (114.0 mg, 62% yield). [α]<sub>D</sub>: +149.3 (c 0.73, CHCl<sub>3</sub>). IR (ATR-FTIR) ν<sub>max</sub>: 3373, 2972, 2928, 2868, 2363, 2339, 1658 cm<sup>-1</sup>. <sup>1</sup>H-NMR (400 MHz, CDCl<sub>3</sub>) δ: 0.08 – 0.92 (m, BH<sub>3</sub>), 1.14 (d, *J<sub>P</sub>* = 14.0 Hz, 9H), 1.30 (d, *J<sub>P</sub>* = 9.0 Hz, 3H), 1.40 (d, *J* = 6.6 Hz, 3H), 2.15 (d, *J* = 12.4 Hz, 1H), 2.27 (s, 3H), 2.30 (s, 6H), 3.02 – 3.16 (m, 1H), 3.23 – 3.40 (m, 1H), 4.28 (td, *J* = 9.5, 4.0 Hz, 1H), 4.89 (dq, *J* = 9.6, 6.6 Hz, 1H), 6.86 (s, 2H) ppm. <sup>13</sup>C-NMR (101 MHz, CDCl<sub>3</sub>) δ: 10.0 (d, *J<sub>P</sub>* = 37.6 Hz, CH<sub>3</sub>), 15.0 (s, CH<sub>3</sub>), 19.7 (s, 2xCH<sub>3</sub>), 21.3 (s, CH<sub>3</sub>), 24.7 (d, *J* = 3.0 Hz, 3xCH<sub>3</sub>), 30.9 (d, *J* = 40.9 Hz, Cq), 44.1 (s, CH<sub>2</sub>), 69.7 (d, *J* = 6.9 Hz, CH), 77.8 (s, CH), 126.0 (s, Cq), 128.5 (s, 2xCH), 136.7 (s, 2xCq), 139.5 (s, Cq), 165.0 (s, Cq) ppm. <sup>31</sup>P-NMR (162 MHz, CDCl<sub>3</sub>) δ: 69.9 – 71.9 (m) ppm. HRMS (ESI): calc for [C<sub>19</sub>H<sub>34</sub>BN<sub>2</sub>OP+H]<sup>+</sup>: 349.2574, found 349.2580.

### Synthesis of (*R<sub>P</sub>*)-9f

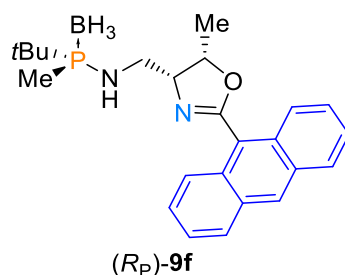

Initially, the corresponding acid chloride was prepared by adding oxalyl chloride (0.14 mL, 1.65 mmol) and one drop of DMF to a solution of anthracene-9-carboxylic acid (122.2 mg, 0.55 mmol) in DCM (5.5 mL) at 0 °C. The solution was stirred at room temperature for 4 h and then evaporated and dried under vacuum for 2 h. Afterwards, following GP4, using (*R<sub>P</sub>*)-7 (125.0 mg, 0.55 mmol), DCM (4.3 mL), Et<sub>3</sub>N (0.15 mL, 1.09 mmol) and 9-anthracenecarboxyl chloride (132.4 mg, 0.55 mmol) afforded intermediate (*R<sub>P</sub>*)-8f as a yellow solid (129.2 mg, 56% yield). <sup>1</sup>H-NMR (400 MHz, CDCl<sub>3</sub>) δ: 0.10 – 0.87 (m, 3H), 1.14 (d, *J* = 14.0 Hz, 9H), 1.35 (d, *J* = 9.2 Hz, 3H), 1.39 (d, *J* = 6.5

Hz, 3H), 2.23 (br s, 1H), 2.67 (d,  $J = 4.8$  Hz, 1H), 3.37 – 3.49 (m, 2H), 4.12 – 4.21 (m, 1H), 4.30 – 4.38 (m, 1H), 6.54 (d,  $J = 8.6$  Hz, 1H), 7.36 – 7.58 (m, 4H), 7.90 – 8.12 (m, 4H), 8.48 (s, 1H) ppm. Consecutively, following GP4, ( $R_P$ )-**8f** (129.2 mg, 0.30 mmol),  $K_2CO_3$  (168.0 mg, 1.22 mmol), DCM (3.7 mL) and DAST (104.0 mg, 0.61 mmol) were used. Purification by silica column chromatography (hexanes:EtOAc 8:2) afforded ( $R_P$ )-**9f** as a yellow solid (68.7 mg, 56% yield). **M.p.**: 118 – 120 °C.  $[\alpha]_D^{25}$ : + 62.6 (c 1.26,  $CHCl_3$ ). **IR (ATR-FTIR)**  $\nu_{max}$ : 3245, 2965, 2926, 2865, 2370, 2258, 1651  $cm^{-1}$ .  **$^1H$ -NMR (400 MHz,  $CDCl_3$ )**  $\delta$ : 0.14 – 0.95 (m,  $BH_3$ ), 1.15 (d,  $J_P = 14.0$  Hz, 9H), 1.36 (d,  $J_P = 9.2$  Hz, 3H), 1.58 (d,  $J = 6.7$  Hz, 3H), 2.38 (d,  $J = 9.6$  Hz, 1H), 3.24 – 3.40 (m, 1H), 3.58 – 3.71 (m, 1H), 4.60 (td,  $J = 9.7, 3.8$  Hz, 1H), 5.19 (dq,  $J = 9.8, 6.7$  Hz, 1H), 7.45 – 7.59 (m, 4H), 8.02 (d,  $J = 7.7$  Hz, 2H), 8.14 (d,  $J = 8.8$  Hz, 2H), 8.55 (s, 1H) ppm.  **$^{13}C$ -NMR (101 MHz,  $CDCl_3$ )**  $\delta$ : 10.5 (d,  $J_P = 40.1$  Hz,  $CH_3$ ), 15.3 (s,  $CH_3$ ), 24.8 (d,  $J_P = 3.1$  Hz,  $3 \times CH_3$ ), 31.5 (d,  $J_P = 38.7$  Hz, Cq), 44.9 (d,  $J_P = 2.3$  Hz,  $CH_2$ ), 71.0 (d,  $J_P = 5.3$  Hz, CH), 78.6 (s, CH), 122.7 (s, Cq), 125.1 (s, CH), 125.6 (s, CH), 127.1 (s, CH), 128.8 (s, CH), 129.8 (s, CH), 130.1 (s, Cq), 131.2 (s, Cq), 164.0 (s, Cq) ppm.  **$^{31}P$ -NMR (162 MHz,  $CDCl_3$ )**  $\delta$ : 70.3 – 72.5 (m) ppm. **HRMS (ESI)**: calc for  $[C_{24}H_{32}BN_2OP+H]^+$ : 407.2418, found 407.2433.

### Synthesis of ( $S_P$ )-**9f**

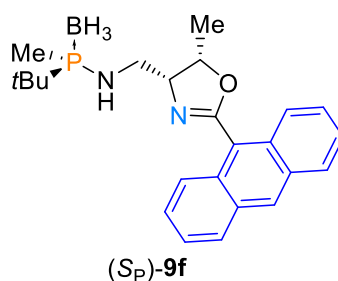

Initially, the corresponding acid chloride was prepared by adding oxalyl chloride (0.15 mL, 1.71 mmol) and one drop of DMF to a solution of anthracene-9-carboxylic acid (133.3 mg, 0.57 mmol) in DCM (5.7 mL) at 0 °C. The solution was stirred at room temperature for 4 h and then evaporated and dried under vacuum for 2 h. Afterwards, following GP4, using ( $S_P$ )-**7** (125.0 mg, 0.57 mmol), DCM (4.3 mL),  $Et_3N$  (0.16 mL, 1.14 mmol) and 9-anthracenecarboxyl chloride (137.2 mg, 0.57 mmol) afforded intermediate ( $S_P$ )-**8f** as a yellow solid (117.5 mg, 49% yield).  **$^1H$ -NMR (400 MHz,  $CDCl_3$ )**  $\delta$ : 0.10 – 0.83 (m, 3H), 1.19 (d,  $J = 14.1$  Hz, 9H), 1.36 (d,  $J = 9.0$  Hz, 3H), 1.41 (d,  $J = 6.4$  Hz, 3H), 2.24 (br s, 1H), 2.39 (d,  $J = 4.6$  Hz, 1H), 3.33 – 3.57 (m, 2H), 4.19 – 4.40 (m, 2H), 6.58 (d,

$J = 8.3$  Hz, 1H), 7.42 – 7.61 (m, 4H), 8.02 (d,  $J = 8.4$  Hz, 2H), 8.08 (d,  $J = 8.6$  Hz, 2H), 8.50 (s, 1H) ppm.

Consecutively, following GP4, (*S<sub>P</sub>*)-**8f** (117.5 mg, 0.28 mmol),  $K_2CO_3$  (153.0 mg, 1.11 mmol), DCM (3.4 mL) and DAST (94.0 mg, 0.55 mmol) were used. Purification by silica column chromatography (hexanes:EtOAc 8:2) afforded (*S<sub>P</sub>*)-**9f** as a yellow solid (56.3 mg, 50% yield). **M.p.**: 129 – 131 °C.  $[\alpha]_D^{25}$ : + 65.9 (c 1.10,  $CHCl_3$ ). **IR (ATR-FTIR)**  $\nu_{max}$ : 3327, 2969, 2945, 2903, 2870, 2385, 1638  $cm^{-1}$ . **<sup>1</sup>H-NMR (400 MHz,  $CDCl_3$ )**  $\delta$ : 0.10 – 0.91 (m,  $BH_3$ ), 1.16 (d,  $J_P = 14.0$  Hz, 9H), 1.36 (d,  $J_P = 9.1$  Hz, 3H), 1.61 (d,  $J = 6.7$  Hz, 3H), 2.26 (br s, 1H), 3.34 – 3.47 (m, 1H), 3.46 – 3.58 (m, 1H), 4.60 (td,  $J = 9.2, 4.1$  Hz, 1H), 5.19 (dq,  $J = 9.8, 6.7$  Hz, 1H), 7.45 – 7.59 (m, 4H), 8.02 (d,  $J = 9.1$  Hz, 2H), 8.15 (d,  $J = 7.6$  Hz, 2H), 8.55 (s, 1H) ppm. **<sup>13</sup>C-NMR (101 MHz,  $CDCl_3$ )**  $\delta$ : 10.2 (d,  $J_P = 38.0$  Hz,  $CH_3$ ), 15.3 (s,  $CH_3$ ), 24.8 (d,  $J_P = 3.0$  Hz,  $3 \times CH_3$ ), 31.0 (d,  $J_P = 40.3$  Hz, Cq), 44.3 (d,  $J_P = 1.9$  Hz,  $CH_2$ ), 70.4 (d,  $J_P = 7.0$  Hz, CH), 78.7 (s, CH), 122.7 (s, Cq), 125.1 (s, CH), 125.6 (s, CH), 127.0 (s, CH), 128.8 (s, CH), 129.8 (s, CH), 130.1 (s, Cq), 131.2 (s, Cq), 164.0 (s, Cq) ppm. **<sup>31</sup>P-NMR (162 MHz,  $CDCl_3$ )**  $\delta$ : 70.5 – 72.3 (m) ppm. **HRMS (ESI)**: calc for  $[C_{24}H_{32}BN_2OP+H]^+$ : 407.2418, found 407.2417.

### 2.2.3 Preparation of catalysts 10-15

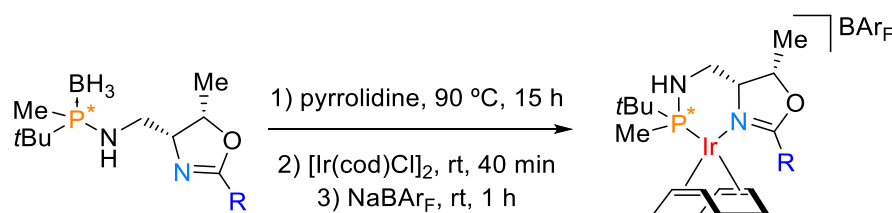

#### General procedure for the preparation of catalysts 10-15 (GP5):

The corresponding borane-protected ligand (1 eq.) was added to a flame-dried Schlenk round-bottom flask, purged with vacuum-nitrogen cycles and dissolved in freshly distilled and degassed pyrrolidine (0.06M). The mixture was stirred for 15 h at 90 °C. Then, under strict inert atmosphere, pyrrolidine was removed under vacuum and further dried at 50 °C for 30 min. A solution of  $[Ir(cod)Cl]_2$  (0.05 eq.) in DCM was added to the free ligand and stirred at room temperature for 40 min.  $NaBAR_F$  (1 eq.) was then added and the solution was stirred for 1 h at room temperature. The resulting crude was purified by filtering through a plug of silica gel under nitrogen, eluting with hexanes:DCM 1:1 (the plug was initially washed with anhydrous  $Et_2O$ ). The coloured fraction was collected and concentrated affording the desired product.

## Synthesis of (*R<sub>P</sub>*)-10

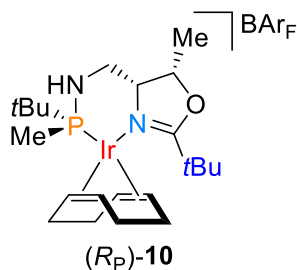

Following GP5, using (*S<sub>P</sub>*)-**9a** (50.0 mg, 0.17 mmol), pyrrolidine (3.2 mL), [Ir(cod)Cl]<sub>2</sub> (58.6 mg, 0.09 mmol), DCM (2.1 mL) and NaBAr<sub>F</sub> (154.8 mg, 0.17 mmol) afforded (*R<sub>P</sub>*)-**10** as an orange-brownish solid (106.4 mg, 42% yield). [ $\alpha$ ]<sub>D</sub>: + 13.4 (c 1.17, CHCl<sub>3</sub>). IR (ATR-FTIR)  $\nu_{\text{max}}$ : 2958, 2925, 2854, 1725, 1599, 1465, 1355, 1277, 1131 cm<sup>-1</sup>. <sup>1</sup>H-NMR (400 MHz, CDCl<sub>3</sub>)  $\delta$ : 1.07 (d, *J<sub>P</sub>* = 15.0 Hz, 9H), 1.30 (d, *J* = 6.7 Hz, 3H), 1.34 (d, *J<sub>P</sub>* = 8.0 Hz, 3H), 1.48 (s, 9H), 1.95 – 2.13 (m, 5H), 2.23 – 2.33 (m, 1H), 2.37 – 2.44 (m, 2H), 2.99 – 3.12 (m, 1H), 3.30 – 3.44 (m, 1H), 3.50 – 3.57 (m, 1H), 3.84 (qu, *J* = 7.2 Hz, 1H), 4.28 (td, *J* = 8.5, 3.6 Hz, 1H), 4.32 – 4.40 (m, 1H), 4.69 – 4.78 (m, 1H), 4.79 – 4.86 (m, 1H), 7.53 (s, 4H), 7.70 (s, 8H) ppm. <sup>13</sup>C-NMR (101 MHz, CDCl<sub>3</sub>)  $\delta$ : 11.1 (d, *J<sub>P</sub>* = 35.9 Hz, CH<sub>3</sub>), 13.5 (s, CH<sub>3</sub>), 25.0 (d, *J<sub>P</sub>* = 2.6 Hz, CH<sub>2</sub>), 26.5 (d, *J<sub>P</sub>* = 5.7 Hz, 3xCH<sub>3</sub>), 28.7 (s, CH<sub>2</sub>), 28.9 (s, 3xCH<sub>3</sub>), 33.6 (s, CH<sub>2</sub>), 33.9 (s, Cq), 37.7 (d, *J<sub>P</sub>* = 2.8 Hz, Cq), 38.0 (d, *J<sub>P</sub>* = 27.9 Hz, CH<sub>2</sub>), 44.0 (s, CH<sub>2</sub>), 64.4 (s, CH), 65.9 (s, CH), 70.1 (s, CH), 79.5 (s, CH), 85.6 (d, *J<sub>P</sub>* = 15.9 Hz, CH), 94.1 (d, *J<sub>P</sub>* = 9.8 Hz, CH), 117.6 (s, 4xCH), 124.7 (q, *J<sub>F</sub>* = 272.8 Hz, 8xCF<sub>3</sub>), 128.4 – 129.6 (m, 8xCq), 134.9 (s, 8xCH), 161.8 (q, *J<sub>B</sub>* = 49.7 Hz, 4xCq), 180.12 (s, Cq) ppm. <sup>31</sup>P-NMR (162 MHz, CDCl<sub>3</sub>)  $\delta$ : 58.7 (s) ppm. HRMS (ESI, infusion): calc for [C<sub>22</sub>H<sub>41</sub>IrN<sub>2</sub>OP]<sup>+</sup>: 573.2580, found 573.2583. Calc for [C<sub>32</sub>H<sub>12</sub>BF<sub>24</sub>]<sup>-</sup>: 863.0654, found 863.0663.

## Synthesis of (*S<sub>P</sub>*)-10

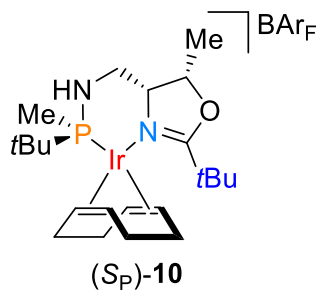

Following GP5, using (*R<sub>P</sub>*)-**9a** (52.7 mg, 0.18 mmol), pyrrolidine (3.2 mL), [Ir(cod)Cl]<sub>2</sub> (61.8 mg, 0.09 mmol), DCM (2.2 mL) and NaBAr<sub>F</sub> (168.2 mg, 0.18 mmol) afforded (*S<sub>P</sub>*)-**10** as an orange solid (133.2 mg, 51% yield). [ $\alpha$ ]<sub>D</sub>: + 43.9 (c 1.06, CHCl<sub>3</sub>). IR (ATR-FTIR)  $\nu_{\text{max}}$ : 2957, 2924, 2873, 2854,

1720, 1602, 1463, 1352, 1272, 1119  $\text{cm}^{-1}$ .  $^1\text{H-NMR}$  (400 MHz,  $\text{CDCl}_3$ )  $\delta$ : 1.06 (d,  $J_P = 14.8$  Hz, 9H), 1.26 (d,  $J = 6.6$  Hz, 3H), 1.39 (d,  $J_P = 6.3$  Hz, 3H), 1.54 (s, 9H), 1.90 – 2.40 (m, 8H), 3.17 – 3.30 (m, 1H), 3.76 – 3.90 (m, 2H), 4.01 – 4.12 (m, 2H), 4.75 (br s, 1H), 4.78 – 4.87 (m, 1H), 4.97 (br s, 1H), 7.53 (s, 4H), 7.70 (s, 8H) ppm.  $^{13}\text{C-NMR}$  (101 MHz,  $\text{CDCl}_3$ )  $\delta$ : 12.9 (d,  $J_P = 28.9$  Hz,  $\text{CH}_3$ ), 15.6 (s,  $\text{CH}_3$ ), 25.0 (d,  $J_P = 3.9$  Hz), 25.1 (d,  $J = 2.8$  Hz), 29.0 (s,  $\text{CH}_2$ ), 29.1 (s,  $3\times\text{CH}_3$ ), 33.9 (s,  $\text{CH}_2$ ), 34.1 (s,  $\text{CH}_2$ ), 35.4 (d,  $J_P = 30.7$  Hz,  $3\times\text{CH}_3$ ), 37.2 (d,  $J_P = 3.7$  Hz,  $\text{CH}_2$ ), 43.6 (d,  $J_P = 4.2$  Hz,  $\text{CH}_2$ ), 60.1 (s, CH), 66.4 (s, CH), 69.4 (s, CH), 79.2 (s, CH), 83.3 (d,  $J_P = 16.9$  Hz, CH), 91.9 (d,  $J = 8.9$  Hz, CH), 117.6 (s,  $4\times\text{CH}$ ), 124.7 (q,  $J = 272.8$  Hz,  $8\times\text{CF}_3$ ), 129.0 (q,  $J = 30$  Hz, Cq), 131.1 (s, Cq), 134.9 (s,  $8\times\text{CH}$ ), 161.8 (q,  $J_B = 49.9$  Hz,  $4\times\text{Cq}$ ), 179.2 (s, Cq)  $^{31}\text{P-NMR}$  (162 MHz,  $\text{CDCl}_3$ )  $\delta$ : 60.1 (s) ppm. **HRMS (ESI, infusion)**: calc for  $[\text{C}_{22}\text{H}_{41}\text{IrN}_2\text{OP}]^+$ : 573.2580, found 573.2607. Calc for  $[\text{C}_{32}\text{H}_{12}\text{BF}_{24}]^-$ : 863.0654, found 863.0667.

### Synthesis of (*R<sub>P</sub>*)-11

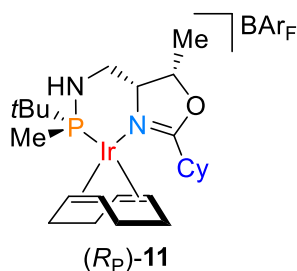

Following GP5, using (*S<sub>P</sub>*)-**9b** (89.1 mg, 0.29 mmol), pyrrolidine (4.8 mL),  $[\text{Ir}(\text{cod})\text{Cl}]_2$  (95.8 mg, 0.14 mmol), DCM (4.8 mL) and  $\text{NaBAr}_F$  (261.0 mg, 0.29 mmol) afforded (*R<sub>P</sub>*)-**11** as a red solid (194.6 mg, 47% yield).  $[\alpha]_D^{25}$ : -24.3 (c 0.96,  $\text{CHCl}_3$ ). **IR (ATR-FTIR)**  $\nu_{\text{max}}$ : 2937, 2929, 2853, 1625, 1458, 1354, 1270, 1118  $\text{cm}^{-1}$ .  $^1\text{H-NMR}$  (400 MHz,  $\text{CDCl}_3$ )  $\delta$ : 1.13 (d,  $J_P = 15.0$  Hz, 9H), 1.20 (d,  $J_P = 8.0$  Hz, 3H), 1.30 (d,  $J = 6.7$  Hz, 3H), 1.44 – 1.88 (m, 11H), 1.97 – 2.14 (m, 3H), 2.21 – 2.40 (m, 2H), 2.41 – 2.57 (m, 3H), 3.11 (tdd,  $J = 14.2, 6.1, 4.4$  Hz, 1H), 3.34 – 3.51 (m, 1H), 3.58 – 3.70 (m, 1H), 3.71 – 3.80 (m, 1H), 4.18 (m, 1H), 4.51 – 4.64 (m, 1H), 4.64 – 4.76 (m, 1H), 4.88 (dq,  $J = 9.4, 6.7$  Hz, 1H), 7.53 (s, 4H), 7.70 (s, 8H) ppm.  $^{13}\text{C-NMR}$  (101 MHz,  $\text{CDCl}_3$ )  $\delta$ : 7.6 (d,  $J_P = 31.6$  Hz,  $\text{CH}_3$ ), 14.4 (s,  $\text{CH}_3$ ), 25.0 (s,  $\text{CH}_2$ ), 25.2 (s,  $\text{CH}_2$ ), 25.2 (s,  $\text{CH}_2$ ), 26.8 (d,  $J_P = 4.8$  Hz,  $3\times\text{CH}_3$ ), 27.0 (s,  $\text{CH}_2$ ), 28.0 (s,  $\text{CH}_2$ ), 29.8 (s,  $\text{CH}_2$ ), 31.4 (s,  $\text{CH}_2$ ), 32.1 (s,  $\text{CH}_2$ ), 36.0 (s,  $\text{CH}_2$ ), 37.6 (d,  $J_P = 33.8$  Hz, Cq), 40.5 (s, CH), 42.9 (s,  $\text{CH}_2$ ), 60.5 (s, CH), 65.3 (s, CH), 67.4 (s, CH), 80.4 (s, CH), 91.8 (d,  $J_P = 12.4$  Hz, CH), 95.0 (d,  $J_P = 12.9$  Hz, CH), 117.6 (s,  $4\times\text{CH}$ ), 124.7 (q,  $J_F = 272.5$  Hz,  $8\times\text{CF}_3$ ), 128.5 – 129.6 (m,  $8\times\text{Cq}$ ), 134.9 (s,  $8\times\text{CH}$ ), 161.8 (q,  $J_B = 50.1$  Hz,  $4\times\text{Cq}$ ), 177.0 (s, Cq) ppm.  $^{31}\text{P}$ -



**NMR (162 MHz, CDCl<sub>3</sub>) δ:** 60.4 (s) ppm. **HRMS (ESI, infusion):** calc for [C<sub>27</sub>H<sub>55</sub>IrN<sub>2</sub>OP]<sup>+</sup>: 599.2736, found 599.2752. Calc for [C<sub>32</sub>H<sub>12</sub>BF<sub>24</sub>]<sup>-</sup>: 863.0654, found 863.0679.

### Synthesis of (*S<sub>P</sub>*)-11

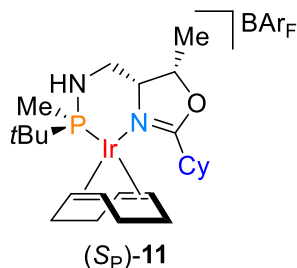

Following GPS, using (*R<sub>P</sub>*)-**9b** (111.9 mg, 0.36 mmol), pyrrolidine (6 mL), [Ir(cod)Cl]<sub>2</sub> (120 mg, 0.18 mmol), DCM (6 mL) and NaBAr<sub>F</sub> (328.0 mg, 0.36 mmol) afforded (*S<sub>P</sub>*)-**11** as a red solid (266.8 mg, 51% yield). [α]<sub>D</sub>: + 39.9 (c 1.02, CHCl<sub>3</sub>). **IR (ATR-FTIR)** ν<sub>max</sub>: 2931, 2856, 1622, 1452, 1353, 1271, 1120 cm<sup>-1</sup>. **<sup>1</sup>H-NMR (400 MHz, CDCl<sub>3</sub>) δ:** 1.04 (d, *J<sub>P</sub>* = 14.7 Hz, 9H), 1.28 (d, *J* = 6.6 Hz, 3H), 1.40 (d, *J<sub>P</sub>* = 6.6 Hz, 3H), 1.47 – 1.73 (m, 7H), 1.73 – 1.87 (m, 3H), 1.85 – 1.94 (m, 2H), 1.95 – 2.08 (m, 2H), 2.09 – 2.21 (m, 2H), 2.22 – 2.37 (m, 3H), 2.92 – 3.05 (m, 1H), 3.16 – 3.36 (m, 1H), 3.57 – 3.71 (m, 1H), 3.95 (dd, *J* = 10.1, 4.9 Hz, 1H), 4.05 – 4.18 (m, 2H), 4.55 (br s, 1H), 4.86 – 5.00 (m, 2H), 7.53 (s, 4H), 7.70 (s, 8H) ppm. **<sup>13</sup>C-NMR (101 MHz, CDCl<sub>3</sub>) δ:** 12.1 (d, *J<sub>P</sub>* = 31.8 Hz, CH<sub>3</sub>), 16.1 (s, CH<sub>3</sub>), 25.1 (d, *J<sub>P</sub>* = 3.9 Hz, 3xCH<sub>3</sub>), 25.2 (s, CH<sub>2</sub>), 25.4 (s, CH<sub>2</sub>), 25.7 (s, CH<sub>2</sub>), 26.7 (s, CH<sub>2</sub>), 29.8 (s, CH<sub>2</sub>), 30.3 (s, CH<sub>2</sub>), 31.4 (s, CH<sub>2</sub>), 32.2 (s, CH<sub>2</sub>), 36.1 (d, *J<sub>P</sub>* = 3.2 Hz, CH<sub>2</sub>), 36.5 (d, *J<sub>P</sub>* = 29.1 Hz, Cq), 41.2 (s, CH), 43.4 (d, *J<sub>P</sub>* = 4.8 Hz, CH<sub>2</sub>), 60.7 (s, CH), 65.5 (s, CH), 66.5 (s, CH), 80.6 (s, CH), 87.2 (d, *J<sub>P</sub>* = 15.3 Hz, CH), 93.0 (d, *J<sub>P</sub>* = 10.7 Hz, CH), 117.6 (s, 4xCH), 124.7 (q, *J<sub>F</sub>* = 272.6 Hz, 8xCF<sub>3</sub>), 128.5 – 129.6 (m, 8xCq), 135.0 (s, 8xCH), 161.9 (q, *J<sub>B</sub>* = 50.0 Hz, 4xCq), 175.7 (s, Cq) ppm. **<sup>31</sup>P-NMR (162 MHz, CDCl<sub>3</sub>) δ:** 63.0 (s) ppm. **HRMS (ESI, infusion):** calc for [C<sub>27</sub>H<sub>55</sub>IrN<sub>2</sub>OP]<sup>+</sup>: 599.2736, found 599.2735. Calc for [C<sub>32</sub>H<sub>12</sub>BF<sub>24</sub>]<sup>-</sup>: 863.0654, found 863.0679.

### Synthesis of (*R<sub>P</sub>*)-12

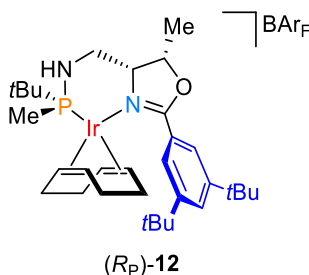

Following GP5, using (*S<sub>P</sub>*)-**9c** (59.6 mg, 0.14 mmol), pyrrolidine (2.4 mL), [Ir(cod)Cl]<sub>2</sub> (47.4 mg, 0.07 mmol), DCM (2.4 mL) and NaBAr<sub>F</sub> (128.9 mg, 0.14 mmol) afforded (*R<sub>P</sub>*)-**12** as an orange solid (125.6 mg, 57% yield). [ $\alpha$ ]<sub>D</sub>: + 28.6 (c 1.19, CHCl<sub>3</sub>). IR (ATR-FTIR)  $\nu_{\text{max}}$ : 2966, 2925, 2870, 2839, 1585, 1354, 1277, 1125 cm<sup>-1</sup>. <sup>1</sup>H-NMR (400 MHz, CDCl<sub>3</sub>)  $\delta$ : 1.16 (d, *J<sub>P</sub>* = 15.0 Hz, 9H), 1.28 (d, *J<sub>P</sub>* = 8.1 Hz, 3H), 1.39 (s, 18H), 1.42 (d, *J* = 6.7 Hz, 3H), 1.66 – 1.89 (m, 2H), 2.08 – 2.25 (m, 3H), 2.29 – 2.41 (m, 1H), 2.48 – 2.62 (m, 2H), 3.15 – 3.24 (m, 1H), 3.27 – 3.42 (m, 1H), 3.66 – 3.73 (m, 1H), 3.96 (br s, 1H), 4.08 (qu, *J* = 7.3 Hz, 1H), 4.59 – 4.69 (m, 2H), 5.00 – 5.08 (m, 1H), 7.53 (s, 4H), 7.71 (s, 8H), 7.78 (s, 1H), 8.05 (s, 2H) ppm. <sup>13</sup>C-NMR (101 MHz, CDCl<sub>3</sub>)  $\delta$ : 8.7 (d, *J<sub>P</sub>* = 38.7 Hz, CH<sub>3</sub>), 13.3 (s, CH<sub>3</sub>), 26.1 (s, CH<sub>2</sub>), 26.6 (d, *J<sub>P</sub>* = 5.6 Hz, 3xCH<sub>3</sub>), 29.7 (d, *J<sub>P</sub>* = 2.1 Hz, CH<sub>2</sub>), 31.5 (s, 6xCH<sub>3</sub>), 31.6 (d, *J<sub>P</sub>* = 2.1 Hz, CH<sub>2</sub>), 35.4 (s, 2xCq), 36.7 (s, CH<sub>2</sub>), 38.4 (d, *J<sub>P</sub>* = 27.9 Hz, Cq), 45.1 (s, CH<sub>2</sub>), 61.4 (s, CH), 66.0 (s, CH), 70.2 (s, CH), 79.5 (s, CH), 90.8 (d, *J<sub>P</sub>* = 12.6 Hz, CH), 97.8 (d, *J<sub>P</sub>* = 12.2 Hz, CH), 117.6 (s, 4xCH), 122.1 (s, Cq), 124.7 (q, *J<sub>F</sub>* = 272.6 Hz, 8xCF<sub>3</sub>), 125.0 (s, 2xCH), 128.5 – 129.6 (m, 8xCq), 129.7 (s, CH), 134.9 (s, 8xCH), 152.3 (s, 2xCq), 161.9 (q, *J<sub>B</sub>* = 49.8 Hz, 4xCq), 169.7 (s, Cq) ppm. <sup>31</sup>P-NMR (162 MHz, CDCl<sub>3</sub>)  $\delta$ : 58.0 (s) ppm. HRMS (ESI, infusion): calc for [C<sub>32</sub>H<sub>53</sub>IrN<sub>2</sub>OP]<sup>+</sup>: 705.3519, found 705.3522. Calc for [C<sub>32</sub>H<sub>12</sub>BF<sub>24</sub>]<sup>-</sup>: 863.0654, found 863.0661.

### Synthesis of (*S<sub>P</sub>*)-**12**

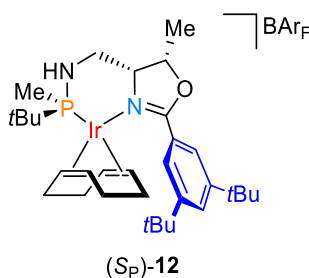

Following GP5, using (*R<sub>P</sub>*)-**9c** (277.5 mg, 0.66 mmol), pyrrolidine (11.1 mL), [Ir(cod)Cl]<sub>2</sub> (222.7 mg, 0.33 mmol), DCM (11.1 mL) and NaBAr<sub>F</sub> (605.9 mg, 0.66 mmol) afforded (*S<sub>P</sub>*)-**12** as an orange solid (777.6 mg, 75% yield). [ $\alpha$ ]<sub>D</sub>: + 48.3 (c 1.03, CHCl<sub>3</sub>). IR (ATR-FTIR)  $\nu_{\text{max}}$ : 2962, 2924, 2875, 2855, 1609, 1585, 1449, 1354, 1277, 1126 cm<sup>-1</sup>. <sup>1</sup>H-NMR (400 MHz, CDCl<sub>3</sub>)  $\delta$ : 1.10 (d, *J<sub>P</sub>* = 14.8 Hz, 9H), 1.37 (d, *J<sub>P</sub>* = 6.6 Hz, 3H), 1.40 (s, 9H), 1.45 (d, *J* = 6.5 Hz, 3H), 1.61 – 1.84 (m, 2H), 1.87 – 2.03 (m, 3H), 2.03 – 2.17 (m, 1H), 2.23 – 2.45 (m, 2H), 3.14 – 3.37 (m, 1H), 3.74 (tt, *J* = 15.4, 4.9 Hz, 1H), 3.88 (br s, 1H), 4.25 – 4.39 (m, 1H), 4.46 (br s, 1H), 4.64 (br s, 1H), 5.00 – 5.13 (m, 1H), 7.52 (s, 4H), 7.71 (s, 8H), 7.82 (t, *J* = 1.8 Hz, 1H), 8.19 (d, *J* = 1.8 Hz, 2H) ppm. <sup>13</sup>C-NMR (101

**MHz, CDCl<sub>3</sub>)**  $\delta$ : 13.5 (d,  $J_P = 27.3$  Hz, CH<sub>3</sub>), 15.1 (s, CH<sub>3</sub>), 25.3 (d,  $J_P = 3.8$  Hz, 3xCH<sub>3</sub>), 28.0 (s, CH<sub>2</sub>), 29.6 (s, CH<sub>2</sub>), 31.4 (s, 6xCH<sub>3</sub>), 32.4 (s, CH<sub>2</sub>), 33.9 (s, CH<sub>2</sub>), 35.4 (s, 2xCq), 35.8 (d,  $J_P = 32.5$  Hz, Cq), 44.0 (s, CH<sub>2</sub>), 62.7 (s, CH), 63.2 (s, CH), 69.5 (s, CH), 79.9 (s, CH), 89.1 (d,  $J_P = 8.1$  Hz, CH), 93.6 (d,  $J_P = 10.9$  Hz, CH), 117.6 (s, 4xCH), 123.0 (s, Cq), 124.7 (s, 2xCH), 124.7 (q,  $J_F = 272.6$  Hz, 8xCF<sub>3</sub>), 128.4 – 129.7 (m, 8xCF<sub>3</sub>), 129.9 (s, CH), 134.9 (s, 8xCH), 152.4 (s, 2xCq), 161.9 (q,  $J_B = 50.1$  Hz, 4xCq) ppm. **<sup>31</sup>P-NMR (162 MHz, CDCl<sub>3</sub>)**  $\delta$ : 60.5 (s) ppm. **HRMS (ESI, infusion)**: calc for [C<sub>32</sub>H<sub>53</sub>IrN<sub>2</sub>OP]<sup>+</sup>: 705.3519, found 705.3545. Calc for [C<sub>32</sub>H<sub>12</sub>BF<sub>24</sub>]<sup>-</sup>: 863.0654, found 863.0680.

### Synthesis of (*R<sub>P</sub>*)-13

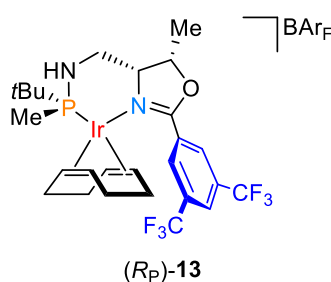

Following GP5, using (*S<sub>P</sub>*)-**9d** (119.8 mg, 0.27 mmol), pyrrolidine (4.5 mL), [Ir(cod)Cl]<sub>2</sub> (91.0 mg, 0.14 mmol), DCM (4.5 mL) and NaBAR<sub>F</sub> (248.0 mg, 0.27 mmol) afforded (*R<sub>P</sub>*)-**13** as an orange solid (300.0 mg, 70% yield). [ $\alpha$ ]<sub>D</sub>: + 34.3 (c 1.02, CHCl<sub>3</sub>). **IR (ATR-FTIR)**  $\nu_{\max}$ : 2962, 2925, 2891, 2847, 1736, 1628, 1610, 1353, 1272, 1117 cm<sup>-1</sup>. **<sup>1</sup>H-NMR (400 MHz, CDCl<sub>3</sub>)**  $\delta$ : 1.03 (d,  $J_P = 15.3$  Hz, 9H), 1.36 (d,  $J_P = 8.1$  Hz, 3H), 1.41 (d,  $J = 6.7$  Hz, 3H), 1.55 – 1.69 (m, 1H), 1.80 – 1.93 (m, 1H), 2.11 – 2.28 (m, 3H), 2.28 – 2.43 (m, 1H), 2.51 – 2.64 (m, 2H), 3.13 – 3.28 (m, 1H), 3.40 – 3.57 (m, 1H), 3.67 (qu,  $J = 7.1$  Hz, 1H), 3.75 – 3.87 (m, 1H), 4.35 – 4.44 (m, 1H), 4.57 (td,  $J = 8.3, 3.7$  Hz, 1H), 4.72 (br s, 1H), 5.07 – 5.18 (m, 1H), 7.52 (s, 4H), 7.70 (s, 8H), 8.24 (s, 1H), 9.13 (s, 2H) ppm. **<sup>13</sup>C-NMR (101 MHz, CDCl<sub>3</sub>)**  $\delta$ : 9.6 (d,  $J_P = 35.1$  Hz, CH<sub>3</sub>), 13.6 (s, CH<sub>3</sub>), 25.6 (s, CH<sub>2</sub>), 26.2 (d,  $J_P = 5.2$  Hz, 3xCH<sub>3</sub>), 29.3 (s, CH<sub>2</sub>), 32.0 (s, CH<sub>2</sub>), 36.6 (s, CH<sub>2</sub>), 37.6 (d,  $J_P = 30.0$  Hz, Cq), 44.1 (s, CH<sub>2</sub>), 66.3 (s, CH), 68.4 (s, CH), 70.7 (s, CH), 81.3 (s, CH), 90.3 (d,  $J_P = 12.9$  Hz, CH), 97.2 (d,  $J_P = 11.4$  Hz, CH), 117.6 (s, 4xCH), 122.6 (q,  $J_F = 273.3$  Hz, 2xCF<sub>3</sub>), 124.7 (q,  $J_F = 272.5$  Hz, 8xCF<sub>3</sub>), 124.7 (s, Cq), 127.7 – 128.0 (m, CH), 128.5 – 129.6 (m, 8xCq), 131.3 (s, 2xCH), 133.1 (q,  $J_F = 34.5$  Hz, 2xCq), 134.9 (s, 8xCH), 161.8 (q,  $J_B = 50.1$  Hz, 4xCq), 165.2 (s, Cq) ppm. **<sup>31</sup>P-NMR (162 MHz, CDCl<sub>3</sub>)**  $\delta$ : 61.2 (s) ppm. **HRMS (ESI, infusion)**: calc for [C<sub>26</sub>H<sub>31</sub>IrN<sub>2</sub>OP]<sup>+</sup>: 729.2015, found 705.2015. Calc for [C<sub>32</sub>H<sub>12</sub>BF<sub>24</sub>]<sup>-</sup>: 863.0654, found 863.0671.

### Synthesis of (*S<sub>p</sub>*)-13

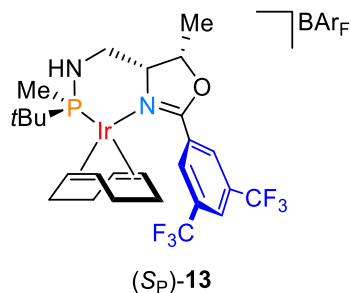

Following GP5, using (*R<sub>p</sub>*)-**9d** (64.5 mg, 0.15 mmol), pyrrolidine (2.4 mL), [Ir(cod)Cl]<sub>2</sub> (49.0 mg, 0.07 mmol), DCM (2.4 mL) and NaBAr<sub>F</sub> (133.0 mg, 0.15 mmol) afforded (*S<sub>p</sub>*)-**13** as an orange solid (139.0 mg, 60% yield). [ $\alpha$ ]<sub>D</sub>: + 62.4 (c 1.17, CHCl<sub>3</sub>). IR (ATR-FTIR)  $\nu_{\text{max}}$ : 2963, 2925, 2878, 2850, 1736, 1629, 1609, 1535, 1469, 1353, 1272, 1112 cm<sup>-1</sup>. <sup>1</sup>H-NMR (400 MHz, CDCl<sub>3</sub>)  $\delta$ : 1.09 (d,  $J_{\text{P}} = 15.0$  Hz, 9H), 1.31 (d,  $J_{\text{P}} = 6.3$  Hz, 3H), 1.36 (d,  $J = 6.7$  Hz, 3H), 1.55 – 1.69 (m, 1H), 1.76 – 1.96 (m, 2H), 1.97 – 2.13 (m, 2H), 2.20 – 2.33 (m, 3H), 2.46 – 2.57 (m, 1H), 3.26 – 3.41 (m, 1H), 3.65 – 3.76 (m, 1H), 3.78 – 3.91 (m, 1H), 4.43 – 4.46 (m, 2H), 4.76 – 4.87 (m, 2H), 5.10 – 5.21 (m, 1H), 7.52 (s, 4H), 7.69 (s, 8H), 8.27 (s, 1H), 9.30 (s, 2H) ppm. <sup>13</sup>C-NMR (101 MHz, CDCl<sub>3</sub>)  $\delta$ : 13.7 (d,  $J_{\text{P}} = 30.8$  Hz, CH<sub>3</sub>), 15.7 (s, CH<sub>3</sub>), 25.1 (d,  $J_{\text{P}} = 3.8$  Hz, 3xCH<sub>3</sub>), 26.6 (s, CH<sub>2</sub>), 31.0 (s, 2xCH<sub>2</sub>), 35.1 (s, CH<sub>2</sub>), 36.4 (d,  $J_{\text{P}} = 30.3$  Hz, Cq), 44.3 (s, CH<sub>2</sub>), 64.2 (s, CH), 66.9 (s, CH), 69.7 (s, CH), 81.3 (s, CH), 88.9 (d,  $J_{\text{P}} = 13.8$  Hz, CH), 94.1 (d,  $J_{\text{P}} = 10.8$  Hz, CH), 117.6 (s, 4xCH), 122.6 (q,  $J_{\text{F}} = 273.5$  Hz, 2xCF<sub>3</sub>), 124.7 (q,  $J_{\text{F}} = 272.6$  Hz, 8xCF<sub>3</sub>), 125.4 (s, Cq), 127.8 – 128.0 (m, CH), 128.5 – 129.6 (m, 8xCq), 131.1 (s, 2xCH), 133.2 (q,  $J_{\text{F}} = 34.6$  Hz, 2xCq), 134.9 (s, 8xCH), 161.8 (q,  $J_{\text{B}} = 50.0$  Hz, 4xCq), 165.0 (s, Cq) ppm. <sup>31</sup>P-NMR (162 MHz, CDCl<sub>3</sub>)  $\delta$ : 62.5 (s) ppm. HRMS (ESI, infusion): calc for [C<sub>26</sub>H<sub>31</sub>IrN<sub>2</sub>OP]<sup>+</sup>: 729.2015, found 705.2010. Calc for [C<sub>32</sub>H<sub>12</sub>BF<sub>24</sub>]<sup>-</sup>: 863.0654, found 863.0646.

### Synthesis of (*R<sub>p</sub>*)-14

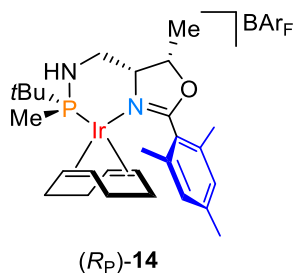

Following GP5, using (*S<sub>p</sub>*)-**9e** (30.7 mg, 0.09 mmol), pyrrolidine (1.5 mL), [Ir(cod)Cl]<sub>2</sub> (29.6 mg, 0.05 mmol), DCM (1.5 mL) and NaBAr<sub>F</sub> (80.5 mg, 0.09 mmol) afforded (*R<sub>p</sub>*)-**14** as a red solid (96.2

mg, 73% yield).  $[\alpha]_{\text{D}}^{\text{20}}$ : - 11.2 (c 0.80,  $\text{CHCl}_3$ ). **IR (ATR-FTIR)**  $\nu_{\text{max}}$ : 2958, 2925, 2847, 2025, 1609, 1480, 1354, 1277, 1125  $\text{cm}^{-1}$ .  **$^1\text{H-NMR}$  (400 MHz,  $\text{CDCl}_3$ )**  $\delta$ : 1.14 (d,  $J_{\text{P}} = 14.7$  Hz, 9H), 1.33 – 1.53 (m, 3H), 1.39 (d,  $J = 7.3$  Hz, 6H), 1.76 – 1.85 (m, 1H), 1.93 – 2.19 (m, 5H), 2.23 (s, 3H), 2.32 (s, 3H), 2.53 (s, 3H), 3.17 – 3.32 (m, 1H), 3.32 – 3.54 (m, 2H), 3.58 – 3.70 (m, 1H), 3.86 – 3.94 (m, 1H), 4.45 (td,  $J = 9.9, 2.4$  Hz, 1H), 4.60 – 4.68 (m, 1H), 4.96 – 5.15 (m, 1H), 6.93 (d,  $J = 16.2$  Hz, 2H), 7.54 (s, 4H), 7.71 (s, 8H) ppm.  **$^{13}\text{C-NMR}$  (101 MHz,  $\text{CDCl}_3$ )**  $\delta$ : 13.0 (d,  $J_{\text{P}} = 37.1$  Hz,  $\text{CH}_3$ ), 13.4 (s,  $\text{CH}_3$ ), 20.5 (s,  $\text{CH}_3$ ), 21.4 (s,  $\text{CH}_3$ ), 22.4 (s,  $\text{CH}_3$ ), 27.0 (d,  $J_{\text{P}} = 4.9$  Hz,  $3\times\text{CH}_3$ ), 27.5 (s,  $\text{CH}_2$ ), 30.8 (s,  $\text{CH}_2$ ), 31.2 (s,  $\text{CH}_2$ ), 34.9 (d,  $J_{\text{P}} = 4.9$  Hz,  $\text{CH}_2$ ), 38.9 (d,  $J_{\text{P}} = 29.1$  Hz, Cq), 45.8 (s,  $\text{CH}_2$ ), 61.0 (s, CH), 64.2 (s, CH), 70.1 (d,  $J_{\text{P}} = 3.8$  Hz, CH), 79.0 (s, CH), 90.2 (d,  $J_{\text{P}} = 13.4$  Hz, CH), 93.0 (d,  $J_{\text{P}} = 11.8$  Hz, CH), 117.4 – 117.8 (m,  $4\times\text{CH}$ ), 122.5 (s, Cq), 124.7 (q,  $J_{\text{F}} = 272.6$  Hz,  $8\times\text{CF}_3$ ), 128.5 – 129.6 (m,  $8\times\text{Cq}$ ), 129.0 (s,  $2\times\text{CH}$ ), 135.0 (s,  $8\times\text{CH}$ ), 138.40 (s, Cq), 143.0 (s,  $2\times\text{Cq}$ ), 161.9 (q,  $J_{\text{B}} = 50.5$  Hz,  $4\times\text{Cq}$ ), 173.3 (s, Cq) ppm.  **$^{31}\text{P-NMR}$  (162 MHz,  $\text{CDCl}_3$ )**  $\delta$ : 53.5 (s) ppm. **HRMS (ESI, infusion)**: calc for  $[\text{C}_{27}\text{H}_{43}\text{IrN}_2\text{OP}]^+$ : 635.2736, found 635.2731. Calc for  $[\text{C}_{32}\text{H}_{12}\text{BF}_4]^-$ : 863.0654, found 863.0667.

### Synthesis of (*S<sub>P</sub>*)-14

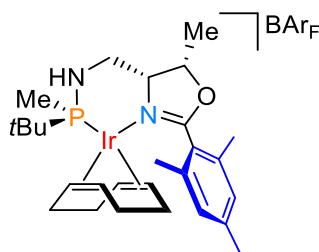

(*S<sub>P</sub>*)-14

Following GPs, using (*R<sub>P</sub>*)-**9e** (86.8 mg, 0.25 mmol), pyrrolidine (4.2 mL),  $[\text{Ir}(\text{cod})\text{Cl}]_2$  (83.7 mg, 0.13 mmol), DCM (4.2 mL) and  $\text{NaBARF}$  (227.7 mg, 0.25 mmol) afforded (*S<sub>P</sub>*)-**14** as a red solid (160.5 mg, 43% yield).  $[\alpha]_{\text{D}}^{\text{20}}$ : + 8.2 (c 1.03,  $\text{CHCl}_3$ ). **IR (ATR-FTIR)**  $\nu_{\text{max}}$ : 2960, 2926, 2027, 1610, 1480, 1354, 1277, 1126  $\text{cm}^{-1}$ .  **$^1\text{H-NMR}$  (400 MHz,  $\text{CDCl}_3$ )**  $\delta$ : 1.11 (d,  $J_{\text{P}} = 14.8$  Hz, 9H), 1.38 (d,  $J = 6.7$  Hz, 3H), 1.44 (d,  $J_{\text{P}} = 7.4$  Hz, 3H), 1.47 – 1.54 (m, 1H), 1.59 – 1.68 (m, 1H), 1.85 – 2.15 (m, 7H), 2.25 (s, 3H), 2.32 (s, 3H), 2.53 (s, 3H), 3.31 – 3.46 (m, 2H), 3.70 – 3.77 (m, 1H), 3.78 – 3.87 (m, 2H), 4.42 – 4.52 (m, 2H), 4.94 – 5.06 (m, 1H), 6.94 (d,  $J = 17.5$  Hz, 2H), 7.53 (s, 4H), 7.71 (s, 8H) ppm.  **$^{13}\text{C-NMR}$  (101 MHz,  $\text{CDCl}_3$ )**  $\delta$ : 12.3 (d,  $J_{\text{P}} = 33.7$  Hz,  $\text{CH}_3$ ), 12.7 (s,  $\text{CH}_3$ ), 20.7 (s,  $\text{CH}_3$ ), 21.4 (s,  $\text{CH}_3$ ), 21.5 (s,  $\text{CH}_3$ ), 26.3 (d,  $J_{\text{P}} = 4.5$  Hz,  $3\times\text{CH}_3$ ), 27.4 (s,  $\text{CH}_2$ ), 30.4 (s,  $\text{CH}_2$ ), 31.6 (s,  $\text{CH}_2$ ), 34.1 (s,  $\text{CH}_2$ ), 36.9 (d,  $J_{\text{P}} = 32.6$  Hz, Cq), 43.6 (s,  $\text{CH}_2$ ), 59.4 (s, CH), 63.0 (d,  $J_{\text{P}} = 5.0$  Hz, CH), 79.4

(s, CH), 91.1 (d,  $J_P = 13.4$  Hz, CH), 94.8 (d,  $J_P = 11.1$  Hz), 117.6 (s, 4xCH), 122.3 (s, Cq), 124.7 (q,  $J_F = 272.7$  Hz, 8xCF<sub>3</sub>), 128.5 – 129.7 (m, 8xCq), 129.5 (s, CH), 129.6 (s, CH), 135.0 (s, 8xCH), 138.3 (s, Cq), 143.4 (s, 2xCq), 161.9 (q,  $J_B = 49.8$  Hz, 4xCq), 174.5 (s, Cq) ppm. **<sup>31</sup>P-NMR (162 MHz, CDCl<sub>3</sub>)**  $\delta$ : 54.4 (s) ppm. **HRMS (ESI, infusion)**: calc for [C<sub>27</sub>H<sub>43</sub>IrN<sub>2</sub>OP]<sup>+</sup>: 635.2736, found 635.2731. Calc for [C<sub>32</sub>H<sub>12</sub>BF<sub>24</sub>]<sup>-</sup>: 863.0654, found 863.0666.

### Synthesis of (*R<sub>P</sub>*)-15

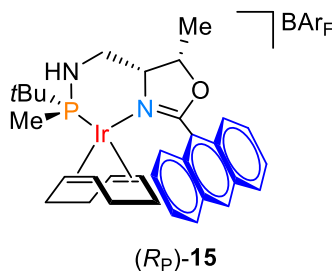

Following GP5, using (*S<sub>P</sub>*)-**9f** (48.9 mg, 0.12 mmol), pyrrolidine (2 mL), [Ir(cod)Cl]<sub>2</sub> (40.4 mg, 0.06 mmol), DCM (2 mL) and NaBAr<sub>F</sub> (110.0 mg, 0.12 mmol) afforded (*R<sub>P</sub>*)-**15** as a red solid (133.3 mg, 71% yield). [ $\alpha$ ]<sub>D</sub>: -67.8 (c 1.01, CHCl<sub>3</sub>). **IR (ATR-FTIR)**  $\nu_{\text{max}}$ : 2949, 2924, 2874, 2855, 1593, 1468, 1353, 1272, 1113 cm<sup>-1</sup>. **<sup>1</sup>H-NMR (400 MHz, CDCl<sub>3</sub>)**  $\delta$ : 0.60 – 0.72 (m, 1H), 0.86 – 1.00 (m, 1H), 1.03 – 1.52 (m, 4H), 1.22 (d,  $J_P = 14.7$  Hz, 9H), 1.40 (d,  $J_P = 7.8$  Hz, 3H), 1.56 (d,  $J = 7.3$  Hz, 3H), 1.86 – 2.02 (m, 2H), 2.43 – 2.56 (m, 2H), 3.51 – 3.67 (m, 4H), 4.54 (br s, 1H), 4.61 – 4.75 (m, 1H), 5.43 – 5.52 (m, 1H), 7.51 – 7.66 (m, 4H), 7.54 (s, 4H), 7.73 (s, 8H), 7.75 – 7.81 (m, 1H), 7.97 (d,  $J = 8.7$  Hz, 1H), 8.12 (dd,  $J = 23.2, 8.3$  Hz, 2H), 8.73 (s, 1H) ppm. **<sup>13</sup>C-NMR (101 MHz, CDCl<sub>3</sub>)**  $\delta$ : 12.3 (d,  $J_P = 38.8$  Hz, CH<sub>3</sub>), 13.8 (s, CH<sub>3</sub>), 27.1 (d,  $J_P = 5.2$  Hz, 3xCH<sub>3</sub>), 27.6 (s, CH<sub>2</sub>), 29.9 (s, CH<sub>2</sub>), 31.1 (d,  $J_P = 18.0$  Hz, CH<sub>2</sub>), 33.8 (d,  $J_P = 3.6$  Hz, CH<sub>2</sub>), 39.1 (d,  $J_P = 28.1$  Hz, Cq), 46.3 (CH<sub>2</sub>), 62.0 (s, CH), 64.7 (s, CH), 70.8 (d,  $J_P = 3.3$  Hz, CH), 80.2 (s, CH), 88.1 (d,  $J_P = 14.4$  Hz, CH), 91.2 (d,  $J_P = 11.2$  Hz, CH), 117.6 (s, 4xCH), 118.4 (s, Cq), 123.0 (s, CH), 123.8 (s, CH), 124.7 (q,  $J_F = 272.6$  Hz, 8xCF<sub>3</sub>), 126.5 (s, CH), 126.6 (s, CH), 128.3 (s, CH), 128.9 (s, CH), 128.5 – 129.7 (m, 8xCq), 129.5 (s, CH), 129.6 (s, CH), 130.6 (s, 3xCq), 131.0 (s, Cq), 132.7 (s, CH), 135.0 (s, 8xCH), 161.9 (q,  $J_B = 49.8$  Hz, 4xCq), 172.2 (s, Cq) ppm. **<sup>31</sup>P-NMR (162 MHz, CDCl<sub>3</sub>)**  $\delta$ : 55.3 (s) ppm. **HRMS (ESI, infusion)**: calc for [C<sub>32</sub>H<sub>41</sub>IrN<sub>2</sub>OP]<sup>+</sup>: 693.2580, found 693.2575. Calc for [C<sub>32</sub>H<sub>12</sub>BF<sub>24</sub>]<sup>-</sup>: 863.0654, found 863.0674.

## Synthesis of (S<sub>P</sub>)-15

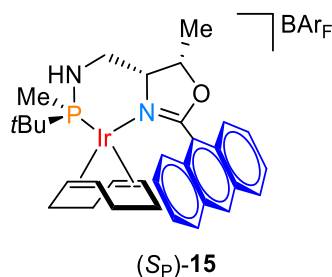

Following GP5, using (*R*<sub>P</sub>)-**9f** (68.7 mg, 0.17 mmol), pyrrolidine (2.8 mL), [Ir(cod)Cl]<sub>2</sub> (57.0 mg, 0.08 mmol), DCM (2.8 mL) and NaBAR<sub>F</sub> (155.0 mg, 0.17 mmol) afforded (S<sub>P</sub>)-**15** as a red solid (99.5 mg, 38% yield). [α]<sub>D</sub>: -9.0 (c 0.92, CHCl<sub>3</sub>). IR (ATR-FTIR) ν<sub>max</sub>: 2961, 2925, 2889, 2852, 1608, 1586, 1459, 1352, 1272, 1113 cm<sup>-1</sup>. <sup>1</sup>H-NMR (400 MHz, CDCl<sub>3</sub>) δ: 0.49 – 0.58 (m, 1H), 0.93 – 1.10 (m, 2H), 1.17 (d, J<sub>P</sub> = 14.7 Hz, 9H), 1.22 – 1.34 (m, 1H), 1.56 – 1.60 (m, 1H), 1.58 (d, J = 6.7 Hz, 3H), 1.62 (d, J<sub>P</sub> = 7.3 Hz, 3H), 1.64 – 1.78 (m, 1H), 1.83 – 2.09 (m, 2H), 2.38 (br s, 1H), 2.57 – 2.66 (m, 1H), 3.51 – 3.84 (m, 4H), 4.49 (br s, 1H), 4.69 – 4.75 (m, 1H), 5.35 – 5.48 (m, 1H), 7.54 (s, 4H), 7.56 – 7.68 (m, 4H), 7.72 (s, 8H), 7.80 (d, J = 8.7 Hz, 1H), 8.11 (d, J = 8.4 Hz, 1H), 8.12 – 8.22 (m, 2H), 8.76 (s, 1H) ppm. <sup>13</sup>C-NMR (101 MHz, CDCl<sub>3</sub>) δ: 12.6 (d, J<sub>P</sub> = 33.4 Hz, CH<sub>3</sub>), 12.9 (s, CH<sub>3</sub>), 26.1 (s, CH<sub>2</sub>), 26.6 (d, J<sub>P</sub> = 4.5 Hz, 3xCH<sub>3</sub>), 30.2 (s, CH<sub>2</sub>), 31.9 (s, CH<sub>2</sub>), 34.4 (d, J<sub>P</sub> = 3.7 Hz, CH<sub>2</sub>), 37.2 (d, J<sub>P</sub> = 30.4 Hz, Cq), 43.5 (s, CH<sub>2</sub>), 59.0 (s, CH), 65.7 (s, CH), 67.1 (s, CH), 80.8 (s, CH), 88.2 (d, J<sub>P</sub> = 15.4 Hz, CH), 94.1 (d, J<sub>P</sub> = 10.0 Hz, CH), 117.6 (s, 4xCH), 118.2 (s, Cq), 123.6 (s, CH), 123.7 (s, CH), 124.7 (q, J<sub>F</sub> = 272.5 Hz, 8xCF<sub>3</sub>), 126.5 (s, CH), 126.6 (s, CH), 128.1 (s, CH), 128.5 - 129.7 (m, 8xCq, CH), 129.2 (s, CH), 129.5 (s, 2xCH), 130.6 (s, Cq), 130.8 (s, Cq), 131.2 (s, 2xCq), 133.3 (s, CH), 135.0 (s, 8xCH), 161.9 (q, J<sub>B</sub> = 49.8 Hz, 4xCq), 172.8 (s, Cq) ppm. <sup>31</sup>P-NMR (162 MHz, CDCl<sub>3</sub>) δ: 55.5 (s) ppm. HRMS (ESI, infusion): calc for [C<sub>32</sub>H<sub>41</sub>IrN<sub>2</sub>OP]<sup>+</sup>: 693.2580, found 693.2594. Calc for [C<sub>32</sub>H<sub>12</sub>BF<sub>24</sub>]<sup>-</sup>: 863.0654, found 863.0683.

## 2.2.4 Preparation of dicyclohexylphosphine catalyst **17**

General synthetic scheme for the preparation of **17**:

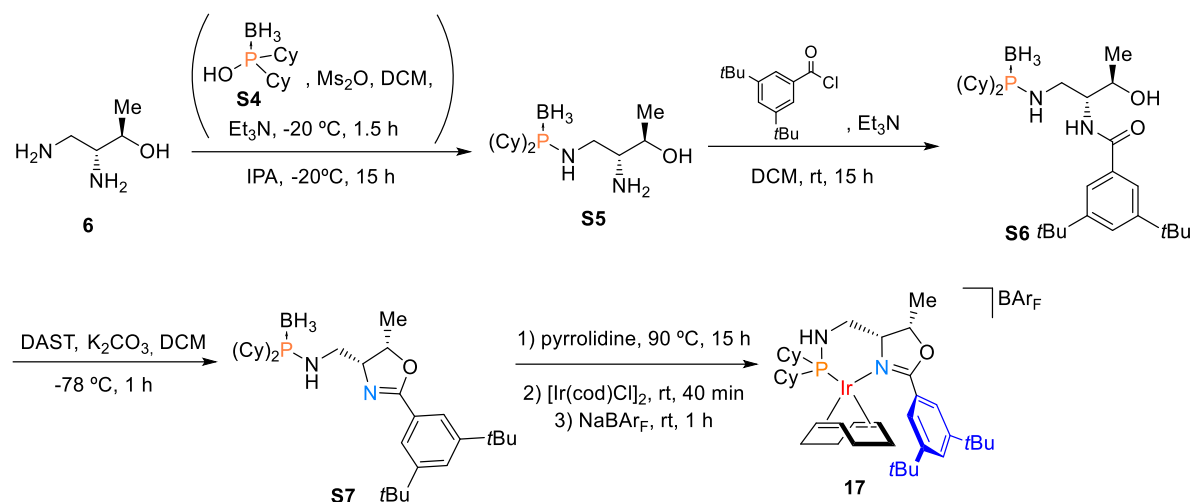

Preparation of dicyclohexyl phosphinous acid **S4** was performed as previously described by our group.<sup>12</sup>

### Synthesis of aminophosphine **S5**

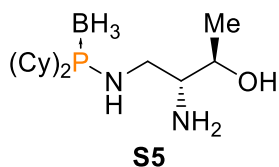

A solution of methanesulfonic anhydride (518 mg, 2.88 mmol) in DCM (6 mL) was prepared in an oven-dried 100 mL round-bottom flask and cooled down to  $-20\text{ }^{\circ}\text{C}$ . Then, dicyclohexyl phosphinous acid **S4** (547.6 mg, 2.40 mmol) was dissolved in DCM (2 mL) and slowly added to the first solution (for more information regarding the preparation of **S4**, see ref. 12). Triethylamine (0.84 mL, 6.00 mmol) was subsequently added to the mixture dropwise and the reaction was stirred at  $-20\text{ }^{\circ}\text{C}$  for 1.5 h. After, a solution of **6** (500.0 mg, 4.80 mmol) in IPA (3.5 mL) was slowly added and the reaction was left to stir at the same temperature for 15 h. After that time, NaOH 1M was added to the solution and it was warmed to room temperature. The solution was diluted with DCM, the organic layer was separated and the aqueous phase was extracted thrice with DCM. The combined extracts were dried over MgSO<sub>4</sub>, filtered and concentrated under vacuum, obtaining **S5** as a white solid without need of further purification (493.3 mg, 65% yield). **M.p.**:  $79 - 81\text{ }^{\circ}\text{C}$ . [ $\alpha$ ]<sub>D</sub>: + 5.6 (c 1.06, CHCl<sub>3</sub>). **IR (ATR-FTIR)**  $\nu_{\text{max}}$ : 3340, 3320, 2925, 2850, 2363, 1541 cm<sup>-1</sup>. **<sup>1</sup>H-NMR (400 MHz, CDCl<sub>3</sub>)**  $\delta$ : 0.00 – 0.84 (m, BH<sub>3</sub>), 1.20 (d,  $J = 6.3\text{ Hz}$ , 3H), 1.21 – 1.44 (m, 6H), 1.58 – 1.91 (m, 18H), 2.55 (dt,  $J = 7.1, 4.8\text{ Hz}$ , 1H), 2.90 (dq,  $J = 13.5, 6.8\text{ Hz}$ , 1H), 3.04 – 3.17 (m, 1H), 3.63 (qd,  $J = 6.3, 4.8\text{ Hz}$ , 1H) ppm.



$^{13}\text{C-NMR}$  (101 MHz,  $\text{CDCl}_3$ )  $\delta$ : 20.5 (s,  $\text{CH}_3$ ), 25.6 – 26.9 (m,  $10\times\text{CH}_2$ ), 34.6 (dd,  $J_{\text{P}} = 38.3, 19.8$  Hz,  $2\times\text{CH}$ ), 47.1 (s,  $\text{CH}_2$ ), 58.3 (s, CH), 68.1 (s, CH) ppm.  $^{31}\text{P-NMR}$  (162 MHz,  $\text{CDCl}_3$ )  $\delta$ : 69.4 – 72.4 (m) ppm. **HRMS (ESI)**: calc for  $[\text{C}_{16}\text{H}_{36}\text{BN}_2\text{OP}+\text{H}]^+$ : 315.2731, found 315.2737.

### Synthesis of phosphinoxazoline **S7**

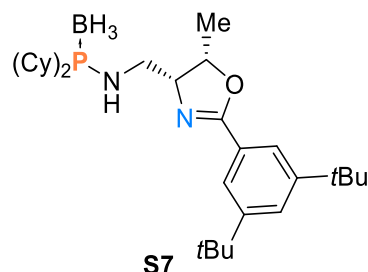

Initially, the corresponding acid chloride was prepared by adding oxalyl chloride (0.77 mL, 2.17 mmol) and one drop of DMF to a solution of 3,5-di-*tert*-butyl benzoic acid (424.2 mg, 1.77 mmol) in DCM (6 mL) at 0 °C. The solution was stirred at room temperature for 3 h and then evaporated and dried under vacuum for 2 h. Afterwards, following GP4, using **S5** (557.5 mg, 1.77 mmol), DCM (11.7 mL),  $\text{Et}_3\text{N}$  (0.49 mL, 3.55 mmol) and 3,5-di-*tert*-butyl benzoyl chloride (447.3 mg, 1.77 mmol) afforded **S6** as a white solid (681.3 mg, 72% yield).  $^1\text{H-NMR}$  (400 MHz,  $\text{CDCl}_3$ )  $\delta$ : 0.03 – 0.82 (m,  $\text{BH}_3$ ), 0.69 – 1.24 (m, 8H), 1.26 (d,  $J = 6.5$  Hz, 4H), 1.35 (s, 18H), 1.60 – 1.88 (m, 14H), 2.76 (br s, 1H), 3.26 (q,  $J = 7.1$  Hz, 2H), 3.91 (q,  $J = 7.4$  Hz, 1H), 4.22 (br s, 1H), 6.65 (d,  $J = 8.3$  Hz, 1H), 7.58 (t,  $J = 1.8$  Hz, 1H), 7.62 (d,  $J = 1.8$  Hz, 2H) ppm.

Consecutively, following GP4, **S6** (668.8 mg, 1.26 mmol),  $\text{K}_2\text{CO}_3$  (696.9 mg, 5.04 mmol), DCM (15.5 mL) and DAST (428.0 mg, 2.52 mmol) were used. Purification by silica column chromatography (hexanes:EtOAc 97:3) afforded **S7** as a white solid (498.6 mg, 77% yield). **M.p.**: 142 – 144 °C.  $[\alpha]_{\text{D}} + 88.0$  (c 0.87,  $\text{CHCl}_3$ ). **IR (ATR-FTIR)**  $\nu_{\text{max}}$ : 3353, 2924, 2849, 2367, 1647, 1636  $\text{cm}^{-1}$ .  $^1\text{H-NMR}$  (400 MHz,  $\text{CDCl}_3$ )  $\delta$ : 0.05 – 0.80 (m,  $\text{BH}_3$ ), 1.13 – 1.49 (m, 8H), 1.35 (s, 18H), 1.39 (d,  $J = 6.7$  Hz, 3H), 1.63 – 2.02 (m, 14H), 2.93 – 3.06 (m, 1H), 3.17 – 3.32 (m, 1H), 4.20 (td,  $J = 9.1, 4.2$  Hz, 1H), 4.79 – 4.92 (m, 1H), 7.56 (t,  $J = 1.8$  Hz, 1H), 7.78 (d,  $J = 1.8$  Hz, 2H) ppm.  $^{13}\text{C-NMR}$  (101 MHz,  $\text{CDCl}_3$ )  $\delta$ : 15.0 (s,  $\text{CH}_3$ ), 25.4 – 27.1 (m,  $10\times\text{CH}_2$ ), 31.5 (s,  $6\times\text{CH}_3$ ), 34.4 (d,  $J_{\text{P}} = 40.0$  Hz, CH), 34.9 (d,  $J_{\text{P}} = 37.6$  Hz, CH), 35.1 (s,  $2\times\text{Cq}$ ), 44.3 (s,  $\text{CH}_2$ ), 69.8 (d,  $J_{\text{P}} = 6.2$  Hz, CH), 78.1 (s, CH), 122.6 (s,  $2\times\text{CH}$ ), 125.9 (s, CH), 127.3 (s, Cq), 151.1 (s,  $2\times\text{Cq}$ ), 164.9 (s, Cq) ppm.  $^{31}\text{P-NMR}$  (162 MHz,  $\text{CDCl}_3$ )  $\delta$ : 68.8 – 71.8 (m) ppm. **HRMS (ESI)**: calc for  $[\text{C}_{31}\text{H}_{54}\text{BN}_2\text{OP}+\text{H}]^+$ : 513.4139, found: 513.4151.

## Synthesis of catalyst **17**

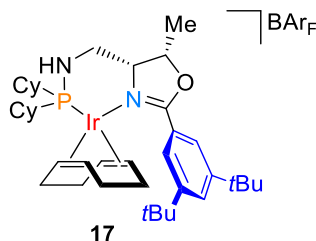

Following GP5, using **S7** (100.0 mg, 0.20 mmol), pyrrolidine (3.3 mL),  $[\text{Ir}(\text{cod})\text{Cl}]_2$  (65.5 mg, 0.098 mmol), DCM (3.3 mL) and  $\text{NaBArF}_4$  (178.2 mg, 0.20 mmol) afforded **17** as an orange solid (260.0 mg, 80% yield).  $[\alpha]_{\text{D}}^{25} + 20.7$  (c 1.01,  $\text{CHCl}_3$ ). IR (ATR-FTIR)  $\nu_{\text{max}}$ : 2957, 2925, 2822, 1540, 1353, 1275, 1120  $\text{cm}^{-1}$ .  $^1\text{H-NMR}$  (400 MHz,  $\text{CDCl}_3$ )  $\delta$ : 1.16 – 1.50 (m, 9H), 1.38 – 1.41 (m, 21H), 1.56 – 1.58 (m, 2H), 1.62 – 1.72 (m, 2H), 1.70 – 1.83 (m, 5H), 1.83 – 1.97 (m, 6H), 2.00 – 2.19 (m, 2H), 2.19 – 2.39 (m, 3H), 2.41 – 2.53 (m, 1H), 3.24 – 3.35 (m, 1H), 3.47 – 3.61 (m, 3H), 4.41 (br s, 1H), 4.44 – 4.52 (m, 1H), 4.72 (br s, 1H), 4.94 – 5.03 (m, 1H), 7.52 (s, 4H), 7.68 – 7.73 (m, 8H), 7.81 (t,  $J = 1.8$  Hz, 1H), 7.96 (d,  $J = 1.8$  Hz, 2H) ppm.  $^{13}\text{C-NMR}$  (101 MHz,  $\text{CDCl}_3$ )  $\delta$ : 13.1 (s,  $\text{CH}_3$ ), 25.6 – 26.9 (m, 9x $\text{CH}_2$ ), 28.6 (s,  $\text{CH}_2$ ), 29.4 (d,  $J_{\text{P}} = 8.3$  Hz,  $\text{CH}_2$ ), 30.1 (s,  $\text{CH}_2$ ), 31.5 (s, 6x $\text{CH}_3$ ), 31.7 (s,  $\text{CH}_2$ ), 35.6 (s, 2x $\text{Cq}$ ), 36.0 (d,  $J_{\text{P}} = 34.5$  Hz, CH), 36.4 (d,  $J_{\text{P}} = 3.0$  Hz,  $\text{CH}_2$ ), 42.5 (d,  $J_{\text{P}} = 29.1$  Hz, CH), 45.2 (s,  $\text{CH}_2$ ), 63.7 (s, CH), 64.7 (s, CH), 68.4 (d,  $J_{\text{P}} = 3.0$  Hz, CH), 79.6 (s, CH), 87.4 (d,  $J_{\text{P}} = 14.4$  Hz, CH), 95.8 (d,  $J_{\text{P}} = 9.5$  Hz, CH), 117.6 (s, 4xCH), 123.4 (s, Cq), 124.5 (s, 2xCH), 124.7 (q,  $J_{\text{F}} = 272.6$  Hz, 8x $\text{CF}_3$ ), 128.4 – 129.7 (m, 8x $\text{CF}_3$ ), 129.8 (s, CH), 134.9 (s, 8xCH), 152.3 (s, 2x $\text{Cq}$ ), 161.9 (q,  $J_{\text{B}} = 50.1$  Hz, 4x $\text{Cq}$ ), 171.2 (s, Cq) ppm.  $^{31}\text{P-NMR}$  (162 MHz,  $\text{CDCl}_3$ )  $\delta$ : 57.6 (s) ppm. HRMS (ESI, infusion): calc for  $[\text{C}_{39}\text{H}_{63}\text{IrN}_2\text{OP}]^+$ : 799.4301, found 799.4293. Calc for  $[\text{C}_{32}\text{H}_{12}\text{BF}_4]^-$ : 863.0654, found 863.0664.

### 2.3 Asymmetric hydrogenation of 2,3-diaryllallyl amines **3a-p**

- All solid allylic substrates were recrystallized in hexanes: $\text{Et}_2\text{O}$  previous to the asymmetric hydrogenation.
- To find suitable HPLC separation conditions, racemates of compounds **19a-c,e-j,n-p** were prepared by treating the corresponding allyl amines **3** with 20 mol% of Pd/C in DCM at 15 bar of  $\text{H}_2$ , for 15 h. Afterwards, reaction crudes were filtered through a small plug of silica to afford analytically pure compounds. Alternatively, racemate of **19d** was prepared by treating **3d** with 3 mol% of Crabtree's catalyst in DCM at 50 bar of  $\text{H}_2$ . Racemates of **19k-m** were

prepared by treating **3k-m** with 5 mol% of Pd/C in EtOH, using a H<sub>2</sub> balloon and short reaction times to avoid dechlorination (reaction control by <sup>1</sup>H-NMR).

**General procedure for the asymmetric hydrogenation of 2,3-diarylallyl amines **3** at 1 mol% (GP6):**

The corresponding substrate (1 eq.), catalyst (*S<sub>P</sub>*)-**12** and a PTFE-coated stir-bar were placed in a glass tube inside a stainless steel high pressure reactor. The reactor was entered into a N<sub>2</sub>-filled glove box and anhydrous DCM (0.3 M) was added. The reactor was closed, removed from the glove box and connected to a hydrogen manifold. The connection was purged with vacuum-nitrogen cycles, the valve of the reactor was opened, it was evacuated and then charged at 50 bar of hydrogen pressure. The valve was closed, the hydrogen manifold was unplugged and the mixture was left to stir at room temperature for 24 or 48 hours. The reactor was then depressurized, the solvent was evaporated and the conversion of the reaction was determined by <sup>1</sup>H-NMR. The crude was purified by silica column chromatography (eluting with hexanes:EtOAc), affording the desired product. The enantiomeric excess was determined by chiral HPLC chromatography.

***tert*-Butyl (*R*)-(2-(4-methoxyphenyl)-3-phenylpropyl)carbamate, **19a****

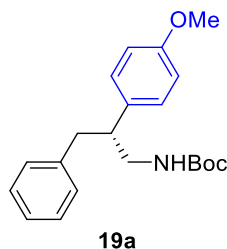

Following GP6, using substrate **3a** (65.0 mg, 0.19 mmol) and catalyst (*S<sub>P</sub>*)-**12** (3.0 mg, 1.9·10<sup>-3</sup> mmol). The reaction was stopped after 24 h and gave 100% conversion. Purification by silica column chromatography (hexanes:EtOAc 9:1) afforded **19a** as a white solid (59.7 mg, 91% yield, 99% ee). **M.p.:** 93 – 95 °C. [ $\alpha$ ]<sub>D</sub>: -21.7 (c 1.00, CHCl<sub>3</sub>). **IR (ATR-FTIR)**  $\nu_{\text{max}}$ : 3346, 2976, 2365, 1667, 1514 cm<sup>-1</sup>. **<sup>1</sup>H-NMR (400 MHz, CDCl<sub>3</sub>)**  $\delta$ : 1.38 (s, 9H), 2.75 – 2.95 (m, 2H), 2.95 – 3.05 (m, 2H), 3.12 – 3.26 (m, 1H), 3.46 – 3.60 (m, 1H), 3.78 (s, 3H), 4.32 (br s, 1H), 6.78 – 6.85 (m, 2H), 6.97 – 7.07 (m, 4H), 7.13 (t, *J* = 7.3 Hz, 1H), 7.19 (t, *J* = 7.3 Hz, 2H) ppm. **<sup>13</sup>C-NMR (101 MHz, CDCl<sub>3</sub>)**  $\delta$ : 28.5, 41.0, 45.6, 47.1, 55.4, 79.4, 114.1, 126.1, 128.3, 129.0, 129.2, 134.1, 139.8, 156.0, 158.5 ppm. **HRMS (ESI):** calc for [C<sub>21</sub>H<sub>27</sub>NO<sub>3</sub>+Na]<sup>+</sup>: 364.1883, found 364.1884. **HPLC:** Chiralpak IA, heptane:EtOH 98:2, 0.5 mL/min,  $\lambda$  = 210 nm, *t<sub>R</sub>* (*R*) = 18.1 min, *t<sub>R</sub>* (*S*) = 20.4 min.

***tert*-Butyl (*R*)-(2-(4-chlorophenyl)-3-phenylpropyl)carbamate, **19b****

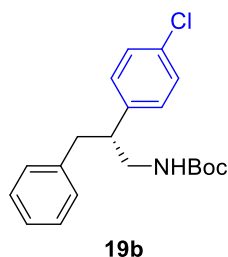

Following GP6, using substrate **3b** (66.6 mg, 0.19 mmol) and catalyst (*S<sub>P</sub>*)-**12** (3.2 mg, 1.9·10<sup>-3</sup> mmol). The reaction was stopped after 24 h and gave 100% conversion. Purification by silica column chromatography (hexanes:EtOAc 85:15) afforded **19b** as a white solid (62.3 mg, 93% yield, 99% ee). **M.p.**: 94 – 98 °C. [ $\alpha$ ]<sub>D</sub>: -28.6 (c 0.90, CHCl<sub>3</sub>). **IR (ATR-FTIR)**  $\nu_{\text{max}}$ : 3332, 2971, 2917, 2851, 1697, 1678, 1518, 1492, 1367, 1290, 1275 cm<sup>-1</sup>. **<sup>1</sup>H-NMR (400 MHz, CDCl<sub>3</sub>)**  $\delta$ : 1.39 (s, 9H), 2.77 – 2.87 (m, 1H), 2.91 – 3.00 (m, 1H), 3.07 (br s, 1H), 3.24 (br s, 1H), 3.45 – 3.61 (m, 1H), 4.33 (br s, 1H), 6.90 – 7.09 (m, 4H), 7.10 – 7.28 (m, 5H) ppm. **<sup>13</sup>C-NMR (101 MHz, CDCl<sub>3</sub>)**  $\delta$ : 28.3, 40.5, 45.4, 47.3, 79.3, 126.1, 128.3, 128.7, 129.0, 129.3, 132.4, 139.1, 140.5, 156.0 ppm. **HRMS (ESI)**: calc for [C<sub>20</sub>H<sub>24</sub>ClNO<sub>2</sub>+Na]<sup>+</sup>: 368.1388, found 368.1397. **HPLC**: Chiralpak IA, heptane:IPA 98:2, 0.5 mL/min,  $\lambda$  = 210 nm,  $t_R$  (*R*) = 30.9 min,  $t_R$  (*S*) = 36.3 min.

***tert*-Butyl (*R*)-(2-(4-fluorophenyl)-3-phenylpropyl)carbamate, **19c****

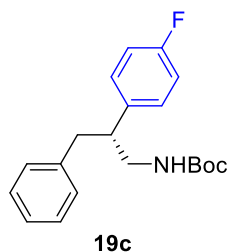

Following GP6, using substrate **3c** (54.1 mg, 0.17 mmol) and catalyst (*S<sub>P</sub>*)-**12** (2.6 mg, 1.7·10<sup>-3</sup> mmol). The reaction was stopped after 48 h and gave 100% conversion. Purification by silica column chromatography (hexanes:EtOAc 93:7) afforded **19c** as a white solid (49.0 mg, 90% yield, 98% ee). **M.p.**: 56 – 58 °C. [ $\alpha$ ]<sub>D</sub>: -20.8 (c 0.61, CHCl<sub>3</sub>). **IR (ATR-FTIR)**  $\nu_{\text{max}}$ : 3446, 2980, 2930, 1701, 1508, 1224 cm<sup>-1</sup>. **<sup>1</sup>H-NMR (400 MHz, CDCl<sub>3</sub>)**  $\delta$ : 1.38 (s, 9H), 2.82 (dd,  $J$  = 13.5, 8.5 Hz, 1H), 2.95 (dd,  $J$  = 13.5, 6.3 Hz, 1H), 3.02 – 3.13 (m, 1H), 3.17 – 3.32 (m, 1H), 3.48 – 3.62 (m, 1H), 4.33 (br s, 1H), 6.92 – 7.03 (m, 4H), 7.03 – 7.11 (m, 2H), 7.11 – 7.22 (m, 3H) ppm. **<sup>13</sup>C-NMR (101 MHz, CDCl<sub>3</sub>)**  $\delta$ : 28.5, 40.8, 45.6, 47.3, 79.4, 115.5 (d,  $J_F$  = 21.1 Hz), 126.3, 128.4, 129.1, 129.5 (d,  $J_F$  = 7.8 Hz), 137.8, 139.4, 155.9, 161.8 (d,  $J_F$  = 244.7 Hz) ppm. **HRMS (ESI)**: calc for [C<sub>20</sub>H<sub>24</sub>FNO<sub>2</sub>+Na]<sup>+</sup>:

352.1683, found 352.1687. **HPLC**: Chiralpak IA, heptane:IPA 98:2, 0.5 mL/min,  $\lambda = 210$  nm,  $t_R$  (R) = 22.0 min,  $t_R$  (S) = 26.1 min.

***tert*-Butyl (R)-(2-(4-benzoylphenyl)-3-phenylpropyl)carbamate, 19d**

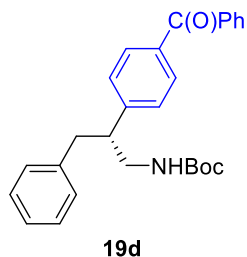

Following GP6, using substrate **3d** (49.6 mg, 0.12 mmol) and catalyst (*S<sub>P</sub>*)-**12** (1.9 mg,  $1.2 \cdot 10^{-3}$  mmol). The reaction was stopped after 48 h and gave 100% conversion. Purification by silica column chromatography (hexanes:EtOAc 85:15) afforded **19d** as a white solid (47.9 mg, 96% yield, 98% ee). **M.p.**: 113 – 115 °C.  $[\alpha]_D^{25}$ : - 35.5 (c 1.16, CHCl<sub>3</sub>). **IR (ATR-FTIR)**  $\nu_{\max}$ : 3449, 3373, 2965, 2927, 1697, 1654, 1507, 1366, 1278 cm<sup>-1</sup>. **<sup>1</sup>H-NMR (400 MHz, CDCl<sub>3</sub>)**  $\delta$ : 1.39 (s, 9H), 2.91 (dd,  $J = 13.7, 8.3$  Hz, 1H), 3.02 (dd,  $J = 13.8, 6.3$  Hz, 1H), 3.14 – 3.26 (m, 1H), 3.27 – 3.38 (m, 1H), 3.52 – 3.64 (m, 1H), 4.39 (br s, 1H), 7.04 (d,  $J = 7.3$  Hz, 2H), 7.12 – 7.26 (m, 5H), 7.48 (t,  $J = 7.5$  Hz, 2H), 7.59 (t,  $J = 7.4$  Hz, 1H), 7.76 (dd,  $J = 17.9, 7.5$  Hz, 4H) ppm. **<sup>13</sup>C-NMR (101 MHz, CDCl<sub>3</sub>)**  $\delta$ : 28.3, 40.3, 45.3, 48.0, 79.4, 126.2, 127.9, 128.2, 128.3, 129.0, 130.0, 130.4, 132.3, 136.1, 137.6, 139.0, 147.2, 155.7, 196.3 ppm. **HRMS (ESI)**: calc for [C<sub>27</sub>H<sub>29</sub>NO<sub>3</sub>+Na]<sup>+</sup>: 438.2040, found 438.2031. **HPLC**: Chiralpak IA, heptane:EtOH 9:1, 0.5 mL/min,  $\lambda = 210$  nm,  $t_R$  (R) = 18.2 min,  $t_R$  (S) = 21.0 min.

**Methyl (R)-4-(1-((*tert*-butoxycarbonyl)amino)-3-phenylpropan-2-yl)benzoate, 19e**

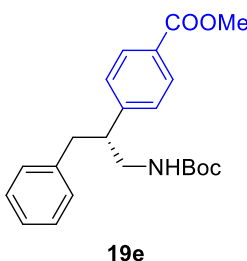

Following GP6, using substrate **3e** (52.6 mg, 0.14 mmol) and catalyst (*S<sub>P</sub>*)-**12** (2.3 mg,  $1.4 \cdot 10^{-3}$  mmol). The reaction was stopped after 48 h and gave 99% conversion. Purification by silica column chromatography (hexanes:EtOAc 8:2) afforded **19e** as a white solid (46.2 mg, 87% yield, 98% ee). **M.p.**: 107 – 109 °C.  $[\alpha]_D^{25}$ : - 30.2 (c 1.05, CHCl<sub>3</sub>). **IR (ATR-FTIR)**  $\nu_{\max}$ : 3439, 3373, 2977, 2927, 1704, 1506, 1279, 1249 cm<sup>-1</sup>. **<sup>1</sup>H-NMR (400 MHz, CDCl<sub>3</sub>)**  $\delta$ : 1.38 (s, 9H), 2.86 (dd,  $J = 13.7, 8.5$

Hz, 1H), 2.99 (dd,  $J = 13.7, 6.1$  Hz, 1H), 3.13 – 3.22 (m, 1H), 3.24 – 3.35 (m, 1H), 3.51 – 3.67 (m, 1H), 4.33 (br s, 1H), 6.99 (d,  $J = 7.2$  Hz, 2H), 7.09 – 7.22 (m, 5H), 7.94 (d,  $J = 8.2$  Hz, 2H) ppm.  $^{13}\text{C-NMR}$  (101 MHz,  $\text{CDCl}_3$ )  $\delta$ : 28.3, 40.3, 45.3, 48.0, 52.0, 79.4, 126.2, 128.0, 128.3, 128.7, 128.94, 129.8, 139.0, 147.5, 155.7, 166.9 ppm. **HRMS (ESI)**: calc for  $[\text{C}_{22}\text{H}_{27}\text{NO}_4+\text{Na}]^+$ : 392.1832, found 392.1831. **HPLC**: Chiralpak IC, heptane:IPA 85:15, 0.5 mL/min,  $\lambda = 210$  nm,  $t_{\text{R}}(\text{S}) = 24.3$  min,  $t_{\text{R}}(\text{R}) = 27.1$  min.

***tert*-Butyl (*R*)-(2-(2-methoxyphenyl)-3-phenylpropyl)carbamate, **19f****

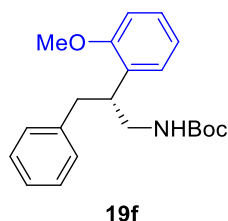

Following GP6, using substrate **3f** (48.6 mg, 0.14 mmol) and catalyst (*S<sub>p</sub>*)-**12** (2.2 mg,  $1.4 \cdot 10^{-3}$  mmol). The reaction was stopped after 48 h and gave 100% conversion. Purification by silica column chromatography (hexanes:EtOAc 9:1) afforded **19f** as a white solid (47.2 mg, 97% yield, 96% ee). **M.p.**: 81 – 83 °C.  $[\alpha]_{\text{D}}$ : -4.2 (c 1.12,  $\text{CHCl}_3$ ). **IR (ATR-FTIR)**  $\nu_{\text{max}}$ : 3436, 2977, 2927, 1701, 1493, 1241, 1164  $\text{cm}^{-1}$ .  $^1\text{H-NMR}$  (400 MHz,  $\text{CDCl}_3$ )  $\delta$ : 1.37 (s, 9H), 2.83 – 2.99 (m, 2H), 3.28 – 3.40 (m, 1H), 3.46 – 3.59 (m, 2H), 3.76 (s, 3H), 4.39 (br s, 1H), 6.84 (d,  $J = 8.2$  Hz, 1H), 6.90 (t,  $J = 7.5$  Hz, 1H), 7.06 – 7.16 (m, 4H), 7.15 – 7.23 (m, 3H) ppm.  $^{13}\text{C-NMR}$  (101 MHz,  $\text{CDCl}_3$ )  $\delta$ : 28.4, 39.2, 40.8, 43.8, 55.3, 78.9, 110.7, 120.7, 125.9, 127.6, 128.1, 129.0, 130.2, 134.1, 140.2, 155.9, 157.6 ppm. **HRMS (ESI)**: calc for  $[\text{C}_{21}\text{H}_{27}\text{NO}_3+\text{H}]^+$ : 342.2064, found 342.2058. **HPLC**: Chiralpak IA, heptane:IPA 97:3, 0.5 mL/min,  $\lambda = 210$  nm,  $t_{\text{R}}(\text{S}) = 24.3$  min,  $t_{\text{R}}(\text{R}) = 27.1$  min.

***tert*-Butyl (*R*)-(2-(2-fluorophenyl)-3-phenylpropyl)carbamate, **19g****

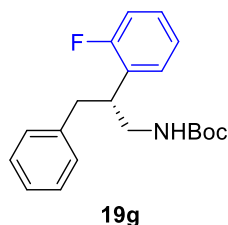

Following GP6, using substrate **3g** (62.6 mg, 0.19 mmol) and catalyst (*S<sub>p</sub>*)-**12** (3.0 mg,  $1.9 \cdot 10^{-3}$  mmol). The reaction was stopped after 48 h and gave 100% conversion. Purification by silica column chromatography (hexanes:EtOAc 95:5) afforded **19g** as a white solid (62.0 mg, 98% yield, 96% ee).

**M.p.:** 78 – 80 °C.  $[\alpha]_{\text{D}}$ : -9.3 (c 1.01, CHCl<sub>3</sub>). **IR (ATR-FTIR)**  $\nu_{\text{max}}$ : 3446, 2974, 2927, 1698, 1491 cm<sup>-1</sup>. **<sup>1</sup>H-NMR (400 MHz, CDCl<sub>3</sub>)**  $\delta$ : 1.37 (s, 3H), 2.88 – 3.62 (m, 3H), 4.39 (br s, 1H), 6.95 – 7.02 (m, 1H), 7.01 – 7.09 (m, 3H), 7.11 – 7.23 (m, 5H) ppm. **<sup>13</sup>C-NMR (101 MHz, CDCl<sub>3</sub>)**  $\delta$ : 28.5, 39.2, 41.7, 44.3, 79.3, 115.7 (d,  $J_{\text{F}} = 23.0$  Hz), 124.30 (d,  $J = 3.6$  Hz), 126.3, 128.3, 128.4, 128.9 (d,  $J = 14.1$  Hz), 129.1, 129.4 (d,  $J = 5.3$  Hz), 139.5, 155.9, 161.5 (d,  $J = 245.1$  Hz) ppm. **HRMS (ESI):** calc for [C<sub>20</sub>H<sub>24</sub>FNO<sub>2</sub>+Na]<sup>+</sup>: 352.1683, found 352.1684. **HPLC:** Chiralpak IC, heptane:IPA 95:5, 0.5 mL/min,  $\lambda = 210$  nm,  $t_{\text{R}}(\text{R}) = 16.9$  min,  $t_{\text{R}}(\text{S}) = 19.8$  min.

***tert*-Butyl (R)-(3-phenyl-2-(*o*-tolyl)propyl)carbamate, 19h**

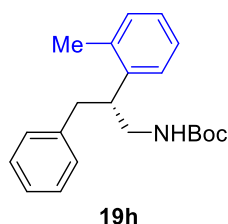

Following GP6, using substrate **3h** (61.9 mg, 0.19 mmol) and catalyst (*S<sub>P</sub>*)-**12** (3.0 mg, 1.9·10<sup>-3</sup> mmol). The reaction was stopped after 48 h and gave 86% conversion. Purification by silica column chromatography (hexanes:EtOAc 95:5) afforded **19h** as a colourless oil (51.7 mg, 83% yield, 99% ee).  $[\alpha]_{\text{D}}$ : -7.7 (c 1.47, CHCl<sub>3</sub>). **IR (ATR-FTIR)**  $\nu_{\text{max}}$ : 3439, 2980, 2929, 1700, 1495, 1365, 1249 cm<sup>-1</sup>. **<sup>1</sup>H-NMR (400 MHz, CDCl<sub>3</sub>)**  $\delta$ : 1.38 (s, 9H), 2.10 (s, 3H), 2.82 (dd,  $J = 13.6, 8.0$  Hz, 1H), 2.91 (dd,  $J = 13.5, 6.6$  Hz, 1H), 3.20 – 3.29 (m, 1H), 3.36 – 3.49 (m, 1H), 3.54 – 3.67 (m, 1H), 4.34 (br s, 1H), 7.01 (d,  $J = 7.1$  Hz, 2H), 7.05 – 7.27 (m, 7H) ppm. **<sup>13</sup>C-NMR (101 MHz, CDCl<sub>3</sub>)**  $\delta$ : 19.7, 28.5, 40.8, 42.5, 45.2, 79.3, 125.9, 126.2, 126.4, 126.5, 128.3, 129.1, 130.6, 137.2, 139.8, 140.5, 160.0 ppm. **HRMS (ESI):** calc for [C<sub>21</sub>H<sub>27</sub>NO<sub>2</sub>+Na]<sup>+</sup>: 348.1934, found 348.1933. **HPLC:** Chiralpak IC, heptane:IPA 95:5, 0.5 mL/min,  $\lambda = 210$  nm,  $t_{\text{R}}(\text{R}) = 14.0$  min,  $t_{\text{R}}(\text{S}) = 18.7$  min.

***tert*-Butyl (R)-(2-(3,5-dimethylphenyl)-3-phenylpropyl)carbamate, 19i**

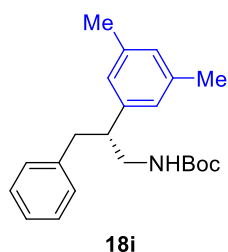

Following GP6, using substrate **3i** (65.8 mg, 0.19 mmol) and catalyst (*S<sub>P</sub>*)-**12** (3.0 mg, 1.9·10<sup>-3</sup> mmol). The reaction was stopped after 48 h and gave 100% conversion. Purification by silica column

chromatography (hexanes:EtOAc 95:5) afforded **19i** as a white solid (55.6 mg, 84% yield, 93% ee). **M.p.:** 76 – 78 °C.  $[\alpha]_{\text{D}}$ : - 13.7 (c 0.68, CHCl<sub>3</sub>). **IR (ATR-FTIR)**  $\nu_{\text{max}}$ : 2980, 2914, 1701, 1496, 1351 cm<sup>-1</sup>. **<sup>1</sup>H-NMR (400 MHz, CDCl<sub>3</sub>)**  $\delta$ : 1.39 (s, 9H), 2.29 (s, 3H), 2.86 – 2.92 (m, 2H), 2.95 – 3.03 (m, 1H), 3.15 – 3.25 (m, 1H), 3.47 – 3.57 (m, 1H), 4.32 (br s, 1H), 6.77 (s, 2H), 6.86 (s, 1H), 7.07 (d,  $J$  = 7.4 Hz, 2H), 7.16 (t,  $J$  = 7.1 Hz, 1H), 7.22 (t,  $J$  = 7.3 Hz, 2H) ppm. **<sup>13</sup>C-NMR (101 MHz, CDCl<sub>3</sub>)**  $\delta$ : 21.5, 28.5, 40.9, 45.4, 47.5, 79.2, 125.8, 126.2, 128.4, 128.6, 129.2, 138.1, 139.9, 142.3, 155.9 ppm. **HRMS (ESI):** calc for [C<sub>22</sub>H<sub>29</sub>NO<sub>2</sub>+H]<sup>+</sup>: 340.2271, found 340.2274. **HPLC:** Chiralpak IA, heptane:IPA 98:2, 0.5 mL/min,  $\lambda$  = 210 nm,  $t_{\text{R}}$  (R) = 13.2 min,  $t_{\text{R}}$  (S) = 14.5 min.

***tert*-Butyl (R)-(2-(3,4-dimethoxyphenyl)-3-phenylpropyl)carbamate, 19j**

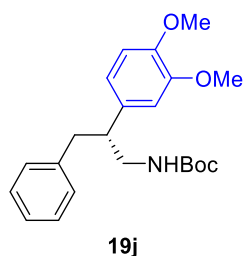

Following GP6, using substrate **3j** (316.6 mg, 0.86 mmol) and catalyst (S<sub>P</sub>)-**12** (13.4 mg, 8.6·10<sup>-3</sup> mmol). The reaction was stopped after 24 h and gave 100% conversion. Purification by silica column chromatography (hexanes:EtOAc 8:2) afforded **19j** as a white solid (291.6 mg, 92% yield, 98% ee). **M.p.:** 86 – 88 °C.  $[\alpha]_{\text{D}}$ : - 22.1 (c 0.84, CHCl<sub>3</sub>). **IR (ATR-FTIR)**  $\nu_{\text{max}}$ : 3383, 3084, 2982, 2962, 2933, 2888, 2837, 1680, 1591, 1515 cm<sup>-1</sup>. **<sup>1</sup>H-NMR (400 MHz, CDCl<sub>3</sub>)**  $\delta$ : 1.39 (s, 9H), 2.83 (dd,  $J$  = 13.4, 8.2 Hz, 1H), 2.87 – 3.04 (m, 2H), 3.18 – 3.32 (m, 1H), 3.47 – 3.62 (m, 1H), 3.80 (s, 3H), 3.85 (s, 3H), 4.37 (br s, 1H), 6.57 (d,  $J$  = 2.0 Hz, 1H), 6.67 (dd,  $J$  = 8.2, 2.0 Hz, 1H), 6.79 (d,  $J$  = 8.2 Hz, 1H), 7.01 (d,  $J$  = 7.4 Hz, 2H), 7.09 – 7.23 (m, 3H) ppm. **<sup>13</sup>C-NMR (101 MHz, CDCl<sub>3</sub>)**  $\delta$ : 28.5, 41.0, 45.5, 47.5, 55.9, 56.0, 79.3, 111.3, 111.4, 119.9, 126.1, 128.3, 129.2, 134.6, 139.7, 147.9, 149.0, 156.0 ppm. **HRMS (ESI):** calc for [C<sub>22</sub>H<sub>29</sub>NO<sub>4</sub>-tBu]<sup>+</sup>: 316.1543, found 316.1543. **HPLC:** Chiralpak IC, heptane:EtOH 8:2, 0.5 mL/min,  $\lambda$  = 210 nm,  $t_{\text{R}}$  (R) = 13.9 min,  $t_{\text{R}}$  (S) = 17.4 min.



***tert*-Butyl (*R*)-(3-(2-chlorophenyl)-2-phenylpropyl)carbamate, **19k****

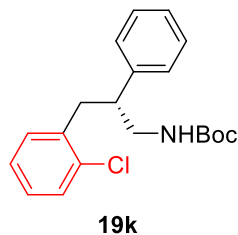

Following GP6, using substrate **3k** (747.6 mg, 2.17 mmol) and catalyst (*S<sub>P</sub>*)-**12** (34.1 mg, 2.2·10<sup>-3</sup> mmol). The reaction was stopped after 48 h and gave 100% conversion. Purification by silica column chromatography (hexanes:EtOAc 95:5) afforded **19k** as a white solid (643.3 mg, 86% yield, 99% ee). **M.p.:** 76 – 78 °C. [ $\alpha$ ]<sub>D</sub>: -27.2 (c 1.02, CHCl<sub>3</sub>). **IR (ATR-FTIR)**  $\nu_{\text{max}}$ : 3379, 3085, 3064, 3028, 2997, 2981, 2968, 2933, 2894, 1687, 1521 cm<sup>-1</sup>. **<sup>1</sup>H-NMR (400 MHz, CDCl<sub>3</sub>)**  $\delta$ : 1.38 (s, 9H), 2.89 – 2.99 (m, 1H), 3.07 – 3.22 (m, 2H), 3.29 – 3.38 (m, 1H), 3.49 – 3.59 (m, 1H), 4.38 (br s, 1H), 6.94 (dd,  $J = 7.4, 1.8$  Hz, 1H), 7.00 – 7.14 (m, 2H), 7.15 (d,  $J = 7.3$  Hz, 2H), 7.19 – 7.24 (m, 1H), 7.26 – 7.33 (m, 3H) ppm. **<sup>13</sup>C-NMR (101 MHz, CDCl<sub>3</sub>)**  $\delta$ : 28.5, 38.4, 45.2, 45.9, 79.3, 126.6, 127.0, 127.8, 128.0, 128.7, 129.6, 131.5, 134.2, 137.4, 142.0, 155.2 ppm. **HRMS (ESI):** calc for [C<sub>20</sub>H<sub>24</sub>ClNO<sub>2</sub>-tBu]<sup>+</sup>: 290.0942, found 290.0941. **HPLC:** Chiralpak IA, heptane:EtOH 98:2, 0.5 mL/min,  $\lambda = 210$  nm,  $t_R$ (*R*) = 14.0 min,  $t_R$ (*S*) = 16.8 min.

***tert*-Butyl (*R*)-(3-(2-chlorophenyl)-2-(4-fluorophenyl)propyl)carbamate, **19l****

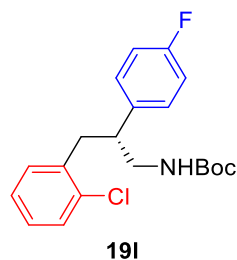

Following GP6, using substrate **3l** (434.2 mg, 1.20 mmol) and catalyst (*S<sub>P</sub>*)-**12** (18.8 mg, 0.012 mmol). The reaction was stopped after 48 h and gave 100% conversion. Purification by silica column chromatography (hexanes:EtOAc 9:1) afforded **19l** as a white solid (362.4 mg, 83% yield, 95% ee). **M.p.:** 62 – 63 °C. [ $\alpha$ ]<sub>D</sub>: -35.7 (c 0.92, CHCl<sub>3</sub>). **IR (ATR-FTIR)**  $\nu_{\text{max}}$ : 3361, 2968, 2927, 1685, 1536, 1510 cm<sup>-1</sup>. **<sup>1</sup>H-NMR (400 MHz, CDCl<sub>3</sub>)**  $\delta$ : 1.39 (s, 9H), 2.87 (dd,  $J = 12.9, 7.5$  Hz, 1H), 3.09 – 3.21 (m, 2H), 3.26 – 3.37 (m, 1H), 3.47 – 3.56 (m, 1H), 4.40 (br s, 1H), 6.91 (d,  $J = 7.5$  Hz, 1H), 6.96 (t,  $J = 8.7$  Hz, 2H), 7.00 – 7.14 (m, 3H), 7.31 (d,  $J = 7.7$  Hz, 1H) ppm. **<sup>13</sup>C-NMR (101 MHz, CDCl<sub>3</sub>)**  $\delta$ : 28.5, 38.5, 45.3, 45.4, 79.4, 115.5 (d,  $J_F = 21.2$  Hz), 126.7, 127.8, 129.4 (d,  $J_F = 7.8$  Hz), 129.7,

131.4, 134.2, 137.2, 137.6 (d,  $J_F = 3.1$  Hz), 155.9, 161.9 (d,  $J_F = 244.8$  Hz) ppm. **HRMS (ESI)**: calc for  $[C_{20}H_{23}ClFNO_2-tBu]^+$ : 308.0848, found 308.0856. **HPLC**: Chiralpak IA, heptane:IPA 98:2, 0.5 mL/min,  $\lambda = 210$  nm,  $t_R(R) = 19.0$  min,  $t_R(S) = 21.4$  min.

***tert*-Butyl (R)-(3-(2-chlorophenyl)-2-(2-methoxyphenyl)propyl)carbamate, 19m**

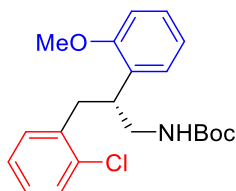

**19m**

Following GP6, using substrate **3m** (333.8 mg, 0.89 mmol) and catalyst ( $S_P$ )-**12** (14.0 mg,  $8.9 \cdot 10^{-3}$  mmol). The reaction was stopped after 48 h and gave 100% conversion. Purification by silica column chromatography (hexanes:EtOAc 9:1) afforded **19m** as a colourless oil (264.1 mg, 79% yield, 94% ee).  $[\alpha]_D$ : -18.5 (c 1.25,  $CHCl_3$ ). **IR (ATR-FTIR)**  $\nu_{max}$ : 3440, 3059, 2974, 2931, 2837, 1699, 1492, 1474  $cm^{-1}$ .  **$^1H$ -NMR (400 MHz,  $CDCl_3$ )**  $\delta$ : 1.38 (s, 9H), 2.97 (dd,  $J = 13.6, 7.8$  Hz, 1H), 3.14 (dd,  $J = 13.7, 7.0$  Hz, 1H), 3.34 – 3.45 (m, 1H), 3.48 – 3.57 (m, 1H), 3.63 (qu,  $J = 7.2$  Hz, 1H), 3.71 (s, 3H), 4.45 (br s, 1H), 6.81 (d,  $J = 8.2$  Hz, 1H), 6.90 (t,  $J = 7.4$  Hz, 1H), 6.94 – 7.11 (m, 3H), 7.11 – 7.23 (m, 2H), 7.30 (d,  $J = 7.6$  Hz, 1H) ppm.  **$^{13}C$ -NMR (101 MHz,  $CDCl_3$ )**  $\delta$ : 28.5, 36.7, 39.7, 44.0, 55.4, 79.1, 110.9, 120.9, 126.5, 127.5, 127.8, 128.5, 129.4, 130.1, 131.3, 134.4, 138.0, 156.0, 157.8 ppm. **HRMS (ESI)**: calc for  $[C_{21}H_{26}ClNO_3-Boc]^+$ : 276.1150, found 276.1156. **HPLC**: Chiralpak IA, heptane:IPA 95:5, 0.5 mL/min,  $\lambda = 210$  nm,  $t_R(R) = 12.8$  min,  $t_R(S) = 14.9$  min.

**(R)-N-(2-(4-Methoxyphenyl)-3-phenylpropyl)-4-methylbenzenesulfonamide, 19n**

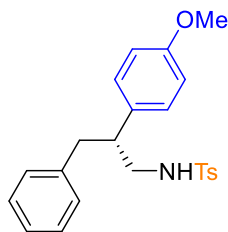

**19n**

Following GP6, using substrate **3n** (54.2 mg, 0.14 mmol) and catalyst ( $S_P$ )-**12** (2.2 mg,  $1.4 \cdot 10^{-3}$  mmol). The reaction was stopped after 48 h and gave 100% conversion. Purification by silica column chromatography (hexanes:EtOAc 8:2) afforded **19n** as a white solid (37.3 mg, 69% yield, 97% ee). **M.p.**: 132 – 135 °C.  $[\alpha]_D$ : -35.2 (c 1.01,  $CHCl_3$ ). **IR (ATR-FTIR)**  $\nu_{max}$ : 3243, 2936, 1739, 1606,

1510, 1311, 1246  $\text{cm}^{-1}$ .  $^1\text{H-NMR}$  (400 MHz,  $\text{CDCl}_3$ )  $\delta$ : 2.44 (s, 3H), 2.74 – 2.94 (m, 3H), 2.95 – 3.11 (m, 1H), 3.21 – 3.33 (m, 1H), 3.78 (s, 3H), 4.08 (br s, 1H), 6.78 (d,  $J = 8.6$  Hz, 2H), 6.86 – 6.98 (m, 4H), 7.11 – 7.24 (m, 3H), 7.27 (d,  $J = 7.5$  Hz, 2H), 7.59 (d,  $J = 8.3$  Hz, 2H) ppm.  $^{13}\text{C-NMR}$  (101 MHz,  $\text{CDCl}_3$ )  $\delta$ : 21.4, 40.3, 46.3, 47.4, 55.1, 114.1, 126.0, 126.9, 128.1, 128.5, 128.8, 129.5, 132.5, 136.6, 138.8, 143.2, 158.5 ppm. HRMS (ESI): calc for  $[\text{C}_{23}\text{H}_{25}\text{NO}_3\text{S}+\text{H}]^+$ : 396.1628, found 396.1625. HPLC: Chiralpak IA, heptane:IPA 9:1, 0.5 mL/min,  $\lambda = 210$  nm,  $t_{\text{R}}(\text{R}) = 35.1$  min,  $t_{\text{R}}(\text{S}) = 38.2$  min.

**(R)-N-(2-(4-Chlorophenyl)-3-phenylpropyl)-4-methylbenzenesulfonamide, 19o**

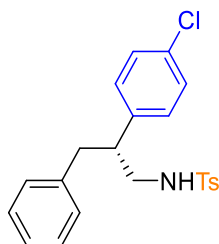

**19o**

Following GP6, using substrate **3o** (43.5 mg, 0.11 mmol) and catalyst ( $S_{\text{P}}$ )-**12** (1.7 mg,  $1.1 \cdot 10^{-3}$  mmol). The reaction was stopped after 48 h and gave 100% conversion. Purification by silica column chromatography (hexanes:EtOAc 8:2) afforded **19o** as a white solid (40.7 mg, 93% yield, 95% ee). **M.p.:** 146 – 147 °C.  $[\alpha]_{\text{D}}: -43.3$  (c 1.08,  $\text{CHCl}_3$ ).  $^1\text{H-NMR}$  (400 MHz,  $\text{CDCl}_3$ )  $\delta$ : 2.37 (s, 3H), 2.69 (dd,  $J = 13.4, 7.7$  Hz, 1H), 2.76 – 2.93 (m, 2H), 2.93 – 3.02 (m, 1H), 3.11 – 3.26 (m, 1H), 4.02 – 4.12 (m, 1H), 6.78 – 6.96 (m, 4H), 7.06 – 7.15 (m, 4H), 7.16 – 7.23 (m, 3H), 7.44 – 7.60 (m, 2H) ppm.  $^{13}\text{C-NMR}$  (101 MHz,  $\text{CDCl}_3$ )  $\delta$ : 21.5, 40.1, 46.9, 47.5, 126.4, 127.1, 128.4, 128.9, 129.0, 129.1, 129.7, 132.9, 136.7, 138.5, 139.3, 143.5 ppm. The NMR data for this compound agreed with that quoted in the literature.<sup>13</sup> HPLC: Chiralpak IA, heptane:IPA 9:1, 0.5 mL/min,  $\lambda = 210$  nm,  $t_{\text{R}}(\text{R}) = 29.1$  min,  $t_{\text{R}}(\text{S}) = 31.5$  min.

**(R)-4-Methyl-N-(3-phenyl-2-(o-tolyl)propyl)benzenesulfonamide, 19p**

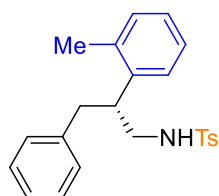

**19p**

Following GP6, using substrate **3p** (59.4 mg, 0.16 mmol) and catalyst (*S<sub>p</sub>*)-**12** (2.5 mg, 1.6·10<sup>-3</sup> mmol). The reaction was stopped after 48 h and gave 100% conversion. Purification by silica column chromatography (hexanes:EtOAc 85:15) afforded **19p** as a white solid (55.5 mg, 93% yield, 98% ee). **M.p.:** 86 – 88 °C. [ $\alpha$ ]<sub>D</sub>: -37.1 (c 1.03, CHCl<sub>3</sub>). **<sup>1</sup>H-NMR (400 MHz, CDCl<sub>3</sub>)  $\delta$ :** 1.93 (s, 3H), 2.35 (s, 3H), 2.67 (dd, *J* = 13.5, 7.3 Hz, 1H), 2.76 (dd, *J* = 13.5, 6.9 Hz, 1H), 2.95 – 3.07 (m, 1H), 3.14 – 3.32 (m, 2H), 4.07 – 4.19 (m, 1H), 6.85 (d, *J* = 5.6 Hz, 2H), 6.91 – 7.14 (m, 7H), 7.18 (d, *J* = 7.7 Hz, 2H), 7.52 (d, *J* = 8.0 Hz, 2H) ppm. **<sup>13</sup>C-NMR (101 MHz, CDCl<sub>3</sub>)  $\delta$ :** 19.1, 21.2, 40.1, 41.7, 46.5, 125.1, 125.9, 126.2, 126.4, 126.7, 127.9, 128.6, 129.3, 130.4, 136.3, 136.7, 138.7, 138.7, 143.0 ppm. The NMR data for this compound agreed with that quoted in the literature.<sup>13</sup> **HPLC:** Chiralpak IA, heptane:IPA 7:3, 0.5 mL/min,  $\lambda$  = 210 nm, *t<sub>R</sub>* (*R*) = 11.0 min, *t<sub>R</sub>* (*S*) = 12.6 min.

#### 2.4 Synthesis of 3-aryl-tetrahydroquinolines **21k-m**

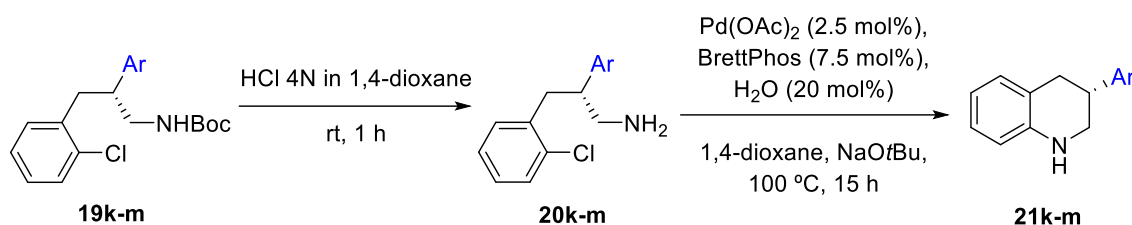

#### General procedure for the preparation of N-unprotected 2,3-diarylpropyl amines (GP7):

The corresponding *N*-Boc-2,3-diarylpropyl amine **19** was dissolved in a solution of HCl 4N in 1,4-dioxane (0.24M) and stirred at room temperature for 1 h. After that time, the solvent was evaporated, the crude was dissolved in DCM and NaOH 1M was added. The organic layer was separated and the aqueous phase was extracted thrice with DCM. The combined extracts were dried over MgSO<sub>4</sub>, filtered and concentrated under vacuum, affording the *N*-unprotected intermediate **20** without need of further purification.

#### Synthesis of (*R*)-3-(2-chlorophenyl)-2-phenylpropan-1-amine, **20k**

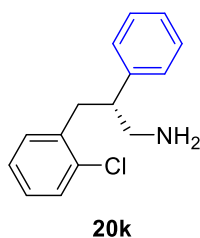

Following GP7, using **19k** (528.2 mg, 1.53 mmol) and HCl 4N in dioxane (6.4 mL) afforded **20k** as a yellow oil without need of further purification (381.1 mg, quantitative yield).  $[\alpha]_{\text{D}}: -57.9$  (c 1.32,  $\text{CHCl}_3$ ). IR (ATR-FTIR)  $\nu_{\text{max}}: 3368, 3060, 3027, 2924, 2856, 1601, 1570, 1473, 1443 \text{ cm}^{-1}$ .  $^1\text{H-NMR}$  (400 MHz,  $\text{CDCl}_3$ )  $\delta: 2.92$  (dd,  $J = 13.1, 6.3 \text{ Hz}$ , 1H), 2.96 – 3.07 (m, 2H), 3.13 (dd,  $J = 13.1, 5.8 \text{ Hz}$ , 1H), 6.95 (dd,  $J = 7.5, 1.8 \text{ Hz}$ , 1H), 7.05 (td,  $J = 7.4, 1.6 \text{ Hz}$ , 1H), 7.09 (td,  $J = 7.6, 1.9 \text{ Hz}$ , 1H), 7.16 – 7.24 (m, 3H), 7.27 – 7.34 (m, 3H) ppm.  $^{13}\text{C-NMR}$  (101 MHz,  $\text{CDCl}_3$ )  $\delta: 38.6, 46.8, 49.8, 126.5, 126.8, 127.6, 128.1, 128.7, 129.6, 131.4, 134.2, 137.9, 142.7$  ppm. HRMS (ESI): calc for  $[\text{C}_{15}\text{H}_{16}\text{ClN}+\text{H}]^+$ : 246.1044, found 246.1042.

#### Synthesis of (R)-3-(2-chlorophenyl)-2-(4-fluorophenyl)propan-1-amine, **20l**

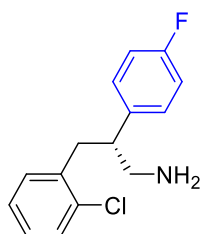

**20l**

Following GP7, using **19l** (335.7 mg, 0.92 mmol) and HCl 4N in dioxane (3.8 mL) afforded **20l** as a yellow oil without need of further purification (233.9 mg, 96% yield).  $[\alpha]_{\text{D}}: -71.4$  (c 1.25,  $\text{CHCl}_3$ ). IR (ATR-FTIR)  $\nu_{\text{max}}: 3376, 3060, 2923, 2856, 1603, 1508, 1474, 1442 \text{ cm}^{-1}$ .  $^1\text{H-NMR}$  (400 MHz,  $\text{CDCl}_3$ )  $\delta: 2.86$  (dd,  $J = 13.1, 7.2 \text{ Hz}$ , 1H), 2.93 – 3.05 (m, 3H), 3.12 (dd,  $J = 13.1, 6.2 \text{ Hz}$ , 1H), 6.91 (dd,  $J = 7.4, 1.9 \text{ Hz}$ , 1H), 6.93 – 7.02 (m, 2H), 7.01 – 7.16 (m, 4H), 7.31 (dd,  $J = 7.8, 1.5 \text{ Hz}$ , 1H) ppm.  $^{13}\text{C-NMR}$  (101 MHz,  $\text{CDCl}_3$ )  $\delta: 38.7, 47.1, 49.0, 115.5$  (d,  $J_{\text{F}} = 21.0 \text{ Hz}$ ), 126.6, 127.7, 129.5 (d,  $J_{\text{F}} = 7.8 \text{ Hz}$ ), 129.6, 131.4, 134.2, 137.7, 138.4 (d,  $J_{\text{F}} = 3.5 \text{ Hz}$ ), 161.8 (d,  $J_{\text{F}} = 244.3 \text{ Hz}$ ) ppm. HRMS (ESI): calc for  $[\text{C}_{15}\text{H}_{15}\text{ClFN}+\text{H}]^+$ : 264.0950, found 264.0949.

#### Synthesis of (R)-3-(2-chlorophenyl)-2-(2-methoxyphenyl)propan-1-amine, **20m**

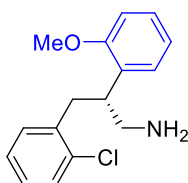

**20m**

Following GP7, using **19m** (286.4 mg, 0.76 mmol) and HCl 4N in dioxane (3.2 mL) afforded **20m** as a yellow oil without need of further purification (193.2 mg, 92% yield).  $[\alpha]_{\text{D}}: -33.1$  (c 1.11,

CHCl<sub>3</sub>). IR (ATR-FTIR)  $\nu_{\max}$ : 3376, 3061, 2933, 2855, 2834, 1598, 1584, 1490, 1462, 1438 cm<sup>-1</sup>. <sup>1</sup>H-NMR (400 MHz, CDCl<sub>3</sub>)  $\delta$ : 1.22 (br s, 2H), 2.86–3.07 (m, 3H), 3.15 (dd,  $J$  = 13.6, 7.2 Hz, 1H), 3.47–3.60 (m, 1H), 3.69 (s, 3H), 6.81 (d,  $J$  = 8.5 Hz, 1H), 6.92 (td,  $J$  = 7.4, 1.2 Hz, 1H), 6.97 (dd,  $J$  = 7.3, 2.2 Hz, 1H), 7.05 (qud,  $J$  = 7.3, 1.8 Hz, 2H), 7.13–7.21 (m, 2H), 7.30 (dd,  $J$  = 7.6, 1.7 Hz, 1H) ppm. <sup>13</sup>C-NMR (101 MHz, CDCl<sub>3</sub>)  $\delta$ : 37.0, 42.8, 45.7, 55.4, 110.9, 120.8, 126.4, 127.3, 127.5, 128.2, 129.3, 130.8, 131.2, 134.4, 138.4, 158.0 ppm. HRMS (ESI): calc for [C<sub>16</sub>H<sub>18</sub>ClNO+H]<sup>+</sup>: 276.1150, found 276.1150.

#### General procedure for the preparation of 3-aryl-tetrahydroquinolines **21** (GP8):<sup>14</sup>

An oven-dried vial was charged with Pd(OAc)<sub>2</sub> (2.5 mol%) and BrettPhos (7.5 mol%). The vial was sealed and purged with vacuum-nitrogen cycles. Then, 1,4-dioxane (0.2M) and degassed H<sub>2</sub>O (20 mol%) were sequentially added and the resulting solution was heated in an oil bath at 100 °C for 1 min. This solution was transferred via syringe to an oven-dried Schlenk tube containing **20k-m** (1 eq.) and NaOtBu (1.2 eq.). The reaction was heated in an oil bath at 100 °C for 15 h. After that time, the reaction was cooled down to room temperature, diluted with EtOAc, and washed once with H<sub>2</sub>O. The organic phase was concentrated and the crude was purified by silica column chromatography using hexanes:EtOAc as eluent, affording the desired product.

#### Synthesis of (+)-(R)-3-phenyl-1,2,3,4-tetrahydroquinoline, **21k**

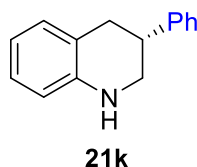

Following GP8, Pd(OAc)<sub>2</sub> (7.4 mg, 0.033 mmol), BrettPhos (55.3 mg, 0.10 mmol), 1,4-dioxane (6.6 mL), degassed H<sub>2</sub>O (5  $\mu$ L, 0.26 mmol), **20k** (323.4 mg, 1.32 mmol) and NaOtBu (156.9 mg, 1.58 mmol) were used. Purification by silica column chromatography (hexanes:EtOAc 97:3) afforded **21k** as a white solid (199.5 mg, 72% yield). [ $\alpha$ ]<sub>D</sub>: + 21.8 (c 0.74, CHCl<sub>3</sub>). <sup>1</sup>H-NMR (400 MHz, CDCl<sub>3</sub>)  $\delta$ : 2.92–3.08 (m, 2H), 3.10–3.21 (m, 1H), 3.34 (t,  $J$  = 10.7 Hz, 1H), 3.47 (ddd,  $J$  = 11.1, 3.9, 1.9 Hz, 1H), 4.04 (br s, 1H), 6.56 (d,  $J$  = 7.5 Hz, 1H), 6.65 (t,  $J$  = 7.4 Hz, 1H), 7.02 (t,  $J$  = 7.1 Hz, 2H), 7.23–7.28 (m, 3H), 7.30–7.39 (m, 2H) ppm. <sup>13</sup>C-NMR (101 MHz, CDCl<sub>3</sub>)  $\delta$ : 35.27, 37.74, 48.04, 114.18, 117.24, 121.48, 126.79, 127.11, 127.35, 128.74, 129.67, 143.99, 144.17 ppm. The analytical data for this compound agreed with that quoted in the literature.<sup>15</sup>

### Synthesis of (+)-(R)-3-(4-fluorophenyl)-1,2,3,4-tetrahydroquinoline, **21l**

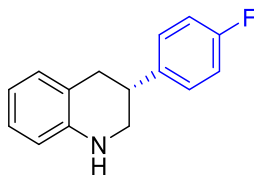

**21l**

Following GP8, Pd(OAc)<sub>2</sub> (4.3 mg, 0.019 mmol), BrettPhos (31.5 mg, 0.056 mmol), 1,4-dioxane (3.8 mL), degassed H<sub>2</sub>O (3 μL, 0.17 mmol), **20l** (197.8 mg, 0.75 mmol) and NaOtBu (89.1 mg, 0.90 mmol) were used. Purification by silica column chromatography (cyclohexane:EtOAc 9:1) afforded **21l** as a white solid (145.7 mg, 85% yield). [α]<sub>D</sub>: + 18.7 (c 1.07, CHCl<sub>3</sub>). <sup>1</sup>H-NMR (400 MHz, CDCl<sub>3</sub>) δ: 2.97 (d, *J* = 8.0 Hz, 2H), 3.08 – 3.20 (m, 1H), 3.30 (t, *J* = 10.6 Hz, 1H), 3.44 (dd, *J* = 10.8, 3.2 Hz, 1H), 4.02 (br s, 1H), 6.55 (d, *J* = 7.7 Hz, 1H), 6.65 (td, *J* = 7.4, 1.2 Hz, 1H), 6.94 – 7.08 (m, 4H), 7.14 – 7.23 (m, 2H) ppm. <sup>13</sup>C-NMR (101 MHz, CDCl<sub>3</sub>) δ: 34.8, 38.1, 48.5, 114.2, 115.5 (d, *J*<sub>F</sub> = 21.1 Hz), 117.3, 121.2, 127.2, 128.7 (d, *J*<sub>F</sub> = 7.9 Hz), 129.7, 139.7 (d, *J*<sub>F</sub> = 3.3 Hz), 144.1, 161.8 (d, *J*<sub>F</sub> = 244.5 Hz) ppm. The analytical data for this compound agreed with that quoted in the literature.<sup>16</sup>

### Synthesis of (+)-(R)-3-(2-methoxyphenyl)-1,2,3,4-tetrahydroquinoline, **21m**

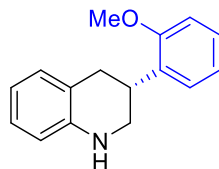

**21m**

Following GP8, Pd(OAc)<sub>2</sub> (3.2 mg, 0.014 mmol), BrettPhos (24.3 mg, 0.043 mmol), 1,4-dioxane (2.9 mL), degassed H<sub>2</sub>O (2 μL, 0.11 mmol), **20m** (159.6 mg, 0.58 mmol) and NaOtBu (68.9 mg, 0.70 mmol) were used. Purification by silica column chromatography (cyclohexane:EtOAc 95:5) afforded **21m** as a white solid (114.2 mg, 82% yield). M.p.: 60 – 62 °C. [α]<sub>D</sub>: + 3.6 (c 1.02, CHCl<sub>3</sub>). IR (ATR-FTIR) ν<sub>max</sub>: 3416, 3013, 2923, 2837, 1603, 1581, 1491, 1461, 1436 cm<sup>-1</sup>. <sup>1</sup>H-NMR (400 MHz, CDCl<sub>3</sub>) δ: 2.90 – 3.09 (m, 2H), 3.32 (t, *J* = 10.6 Hz, 1H), 3.41 – 3.49 (m, 1H), 3.54 – 3.67 (m, 1H), 3.83 (s, 3H), 3.99 (br s, 1H), 6.55 (dd, *J* = 8.3, 1.2 Hz, 1H), 6.64 (td, *J* = 7.3, 1.2 Hz, 1H), 6.90 (d, *J* = 8.2 Hz, 1H), 6.94 (td, *J* = 7.5, 1.1 Hz, 1H), 7.01 (d, *J* = 7.2 Hz, 2H), 7.15 (dd, *J* = 7.2, 1.8 Hz, 1H), 7.23 (td, *J* = 7.7, 1.7 Hz, 1H) ppm. <sup>13</sup>C-NMR (101 MHz, CDCl<sub>3</sub>) δ: 31.5, 33.3, 47.2, 55.5, 110.5, 114.2, 117.1, 120.8, 121.9, 126.9, 127.0, 127.5, 129.7, 132.1, 144.3, 157.2 ppm. HRMS (ESI): calc for [C<sub>16</sub>H<sub>17</sub>NO+H]<sup>+</sup>: 240.1383, found 240.1383.

## 2.5 Synthesis of 4-benzyl-tetrahydroisoquinoline 23

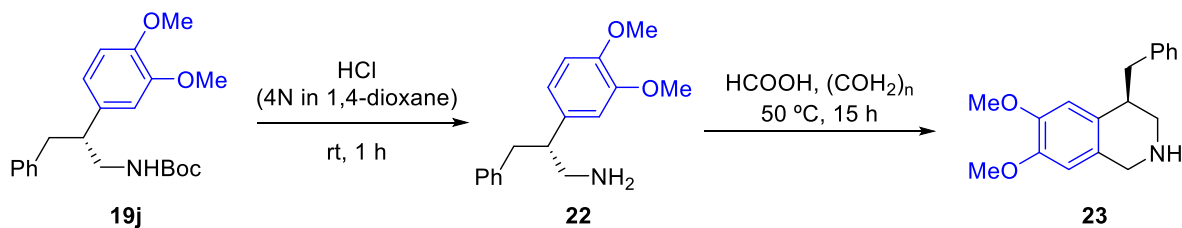

### Synthesis of (*R*)-2-(3,4-dimethoxyphenyl)-3-phenylpropan-1-amine, **22**

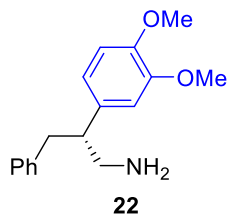

Following GP7, using **19j** (328.8 mg, 0.89 mmol) and HCl 4N in dioxane (3.7 mL) afforded **22** as a yellow oil without need of further purification (216.2 mg, 90% yield). [ $\alpha$ ]<sub>D</sub>: - 66.4 (c 0.92, CHCl<sub>3</sub>). IR (ATR-FTIR)  $\nu_{\text{max}}$ : 3375, 3058, 3023, 2999, 2926, 2833, 1602, 1590, 1514, 1462, 1452 cm<sup>-1</sup>. <sup>1</sup>H-NMR (400 MHz, CDCl<sub>3</sub>)  $\delta$ : 1.22 (br s, 2H), 2.78 – 3.00 (m, 5H), 3.82 (s, 3H), 3.85 (s, 3H), 6.62 (s, 1H), 6.71 (d, *J* = 8.2 Hz, 1H), 6.80 (d, *J* = 8.1 Hz, 1H), 7.04 (d, *J* = 7.4 Hz, 2H), 7.11 – 7.23 (m, 3H) ppm. <sup>13</sup>C-NMR (101 MHz, CDCl<sub>3</sub>)  $\delta$ : 41.1, 47.1, 51.2, 55.9, 56.0, 111.3, 120.0, 126.0, 128.3, 129.2, 135.5, 140.3, 147.7, 149.0 ppm. HRMS (ESI): calc for [C<sub>17</sub>H<sub>21</sub>NO<sub>2</sub>+H]<sup>+</sup>: 272.1645, found 272.1648.

### Synthesis of (*R*)-4-benzyl-6,7-dimethoxy-1,2,3,4-tetrahydroisoquinoline, **23**

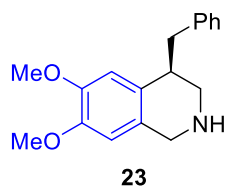

A vial was charged with **22** (108.1 mg, 0.40 mmol), cooled down to 0 °C and formic acid (0.22 mL) was added. After stirring at 0 °C for 10 min, paraformaldehyde (12.0 mg, 0.40 mmol) was added. The reaction mixture was then stirred at 50 °C for 15 h. Afterwards, excess formic acid was evaporated under reduced pressure, and ice-water was poured into the residue. The mixture was then basified to pH 11 with NaOH 1M and extracted with DCM (x3). The combined organic layers were dried over MgSO<sub>4</sub> and concentrated under vacuum. The crude was purified by silica column chromatography (DCM:MeOH 9:1), obtaining **23** as a colourless oil (76.9 mg, 68% yield). [ $\alpha$ ]<sub>D</sub>: - 58.8 (c 1.16,



CHCl<sub>3</sub>). IR (ATR-FTIR)  $\nu_{\max}$ : 3337, 3056, 3023, 2997, 2930, 2832, 1608, 1511, 1463, 1452 cm<sup>-1</sup>. <sup>1</sup>H-NMR (400 MHz, CDCl<sub>3</sub>)  $\delta$ : 2.14 (br s, 1H), 2.83 – 3.08 (m, 5H), 3.72 (s, 5H), 3.84 (s, 5H), 3.94 (s, 2H), 6.45 (s, 1H), 6.51 (s, 1H), 7.20 (dd,  $J = 17.2, 7.1$  Hz, 3H), 7.30 (t,  $J = 7.4$  Hz, 2H) ppm. <sup>13</sup>C-NMR (101 MHz, CDCl<sub>3</sub>)  $\delta$ : 38.8, 42.4, 47.7, 48.3, 55.9, 56.0, 108.8, 112.1, 126.2, 127.8, 128.5, 129.5, 130.1, 140.5, 147.2, 147.5 ppm. HRMS (ESI): calc for [C<sub>18</sub>H<sub>21</sub>NO<sub>2</sub>+H]<sup>+</sup>: 284.1645, found 284.1647.

## 2.6 References

- 1 A. Cabré, H. Khaizourane, M. Garçon, X. Verdaguer, A. Riera, *Org. Lett.* **2018**, *20*, 3953 – 3957.
- 2 S. Kim-Lee, I. Alonso, P. Mauleón, R. Arrayás, J. Carretero, *ACS Catal.* **2018**, *8*, 8993 – 9005.
- 3 J. Xie, Z. Guo, Y. Huang, Y. Qu, H. Song, H. Song, Y. Liu, Q. Wang, *Adv. Synth. Catal.* **2019**, *361*, 490 – 495.
- 4 K. M. Miller, C. Molinaro, T. F. Jamison, *Tetrahedron: Asymmetry* **2003**, *14*, 3619 – 3625.
- 5 L. Zhang, J. Panteleev, M. Lautens, *J. Org. Chem.* **2014**, *79*, 12159 – 12176.
- 6 C. Nieto-Oberhuber, P. Pérez-Galán, E. Herrero-Gómez, T. Lauterbach, D. J. Cárdenas, A. M. Echavarren, *J. Am. Chem. Soc.* **2008**, *130*, 269 – 279.
- 7 A. L. Moure, R. G. Arrayás, D. J. Cárdenas, I. Alonso, J. C. Carretero, *J. Am. Chem. Soc.* **2012**, *134*, 7219 – 7222.
- 8 S. Mannathan, M. Jeganmohan, C.-H. Cheng, *Angew. Chem. Int. Ed.* **2009**, *48*, 2192 – 2195.
- 9 S. Orgué, A. Flores-Gaspar, M. Biosca, O. Pàmies, M. Diéguez, A. Riera, X. Verdaguer, *Chem. Commun.* **2015**, *51*, 17548 – 17551.
- 10 T. León, A. Riera, X. Verdaguer, *J. Am. Chem. Soc.* **2011**, *133*, 5740 – 5743.
- 11 E. Salomó, A. Prades, A. Riera, X. Verdaguer, *J. Org. Chem.* **2017**, *82*, 7065 – 7069.
- 12 E. Salomó, P. Rojo, P. Hernández-Lladó, A. Riera, X. Verdaguer, *J. Org. Chem.* **2018**, *83*, 4618 – 4627.
- 13 X. Yu, Q.-Q. Zhou, P.-Z. Wang, C.-M. Liao, J.-R. Chen, W.-J. Xiao, *Org. Lett.* **2018**, *20*, 421 – 424.
- 14 The procedure was adapted from: B. P. Fors, D. A. Watson, M. R. Biscoe, S. L. Buchwald, *J. Am. Chem. Soc.* **2008**, *130*, 13552 – 13554.
- 15 M. Rueping, T. Theissmann, S. Raja, J. W. Bats, *Adv. Synth. Catal.* **2008**, *350*, 1001 – 1006.
- 16 X. Zhao, J. Xiao, W. Tang, *Synthesis* **2017**, *49*, 3157 – 3164.

### 3. Crystallographic information

#### X-ray of (*S<sub>P</sub>*)-**12**:

The single crystal suited for X-ray diffraction was grown by layering recrystallization of (*S<sub>P</sub>*)-**12** in an hexanes/DCM solvent system at 4 °C. The BARF counterion has been omitted for clarity. CCDC No. 2157242.

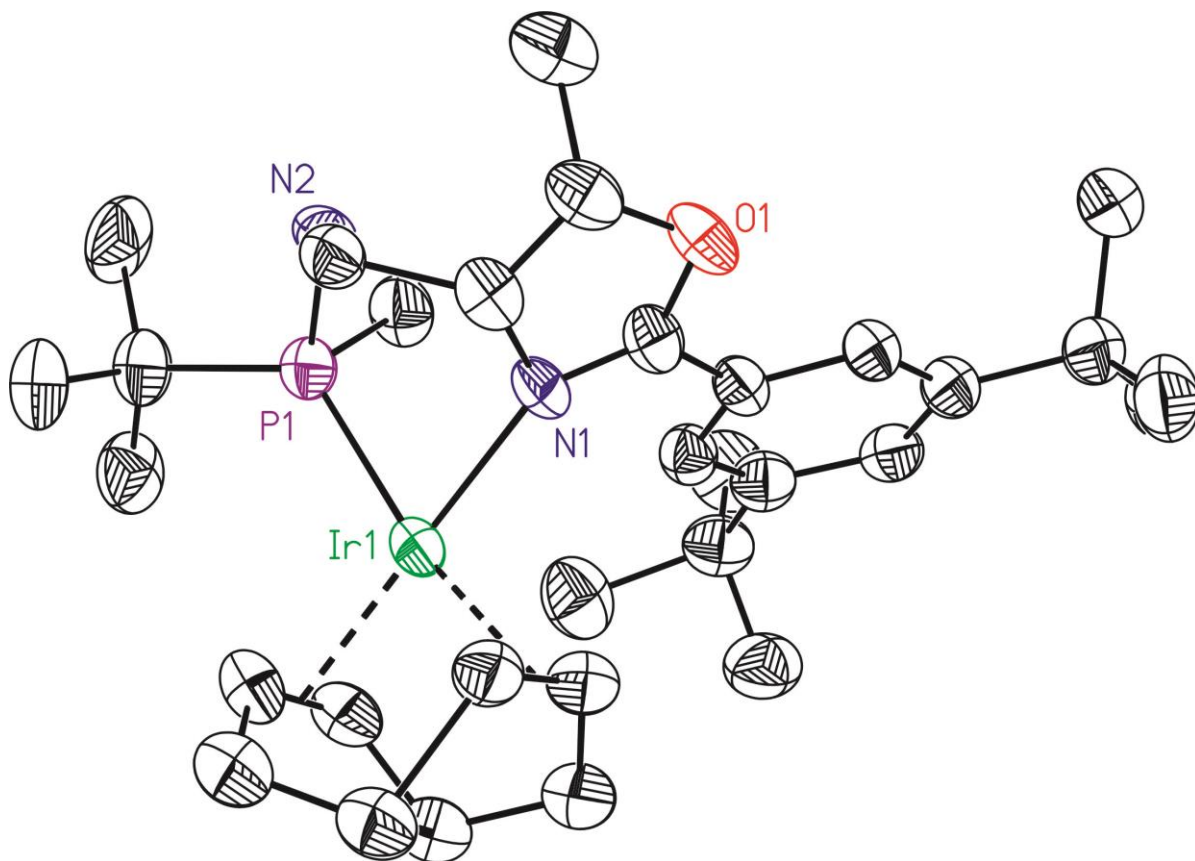

**Figure S1:** X-ray of (*S<sub>P</sub>*)-**12**. ORTEP diagram shows thermal ellipsoids at 50% probability.

**Table S1:** Crystal data of (S<sub>p</sub>)-12.

|                                   |                                                                         |
|-----------------------------------|-------------------------------------------------------------------------|
| Empirical formula                 | C <sub>64</sub> H <sub>65</sub> B F <sub>24</sub> Ir N <sub>2</sub> O P |
| Formula weight                    | 1568.16                                                                 |
| Temperature                       | 100(2)K                                                                 |
| Wavelength                        | 0.71073 Å                                                               |
| Crystal system                    | triclinic                                                               |
| Space group                       | P 1                                                                     |
| Unit cell dimensions              | a = 9.36972(11)Å    α = 96.9834(11)°.                                   |
|                                   | b = 13.39240(18)Å    β = 102.7926(11)°.                                 |
|                                   | c = 13.8805(2)Å    γ = 100.6079(11)°.                                   |
| Volume                            | 1645.38(4) Å <sup>3</sup>                                               |
| Z                                 | 1                                                                       |
| Density (calculated)              | 1.583 Mg/m <sup>3</sup>                                                 |
| Absorption coefficient            | 2.164 mm <sup>-1</sup>                                                  |
| F(000)                            | 784                                                                     |
| Crystal size                      | 0.090 x 0.090 x 0.010 mm <sup>3</sup>                                   |
| Theta range for data collection   | 2.284 to 34.457°.                                                       |
| Index ranges                      | -14<=h<=14,-21<=k<=21,-22<=l<=21                                        |
| Reflections collected             | 90329                                                                   |
| Independent reflections           | 26243[R(int) = 0.0406]                                                  |
| Completeness to theta =34.457°    | 96.4%                                                                   |
| Absorption correction             | Multi-scan                                                              |
| Max. and min. transmission        | 1.00 and 0.81                                                           |
| Refinement method                 | Full-matrix least-squares on F <sup>2</sup>                             |
| Data / restraints / parameters    | 26243/ 4136/ 1556                                                       |
| Goodness-of-fit on F <sup>2</sup> | 0.995                                                                   |
| Final R indices [I>2sigma(I)]     | R1 = 0.0541, wR2 = 0.1306                                               |
| R indices (all data)              | R1 = 0.0681, wR2 = 0.1382                                               |
| Largest diff. peak and hole       | 3.257 and -1.259 e.Å <sup>-3</sup>                                      |

**X-ray of (*R<sub>p</sub>*)-12:**

The single crystal suited for X-ray diffraction was grown by layering recrystallization of (*R<sub>p</sub>*)-12 in an hexanes/DCM solvent system at 4 °C. CCDC No. 2157243.

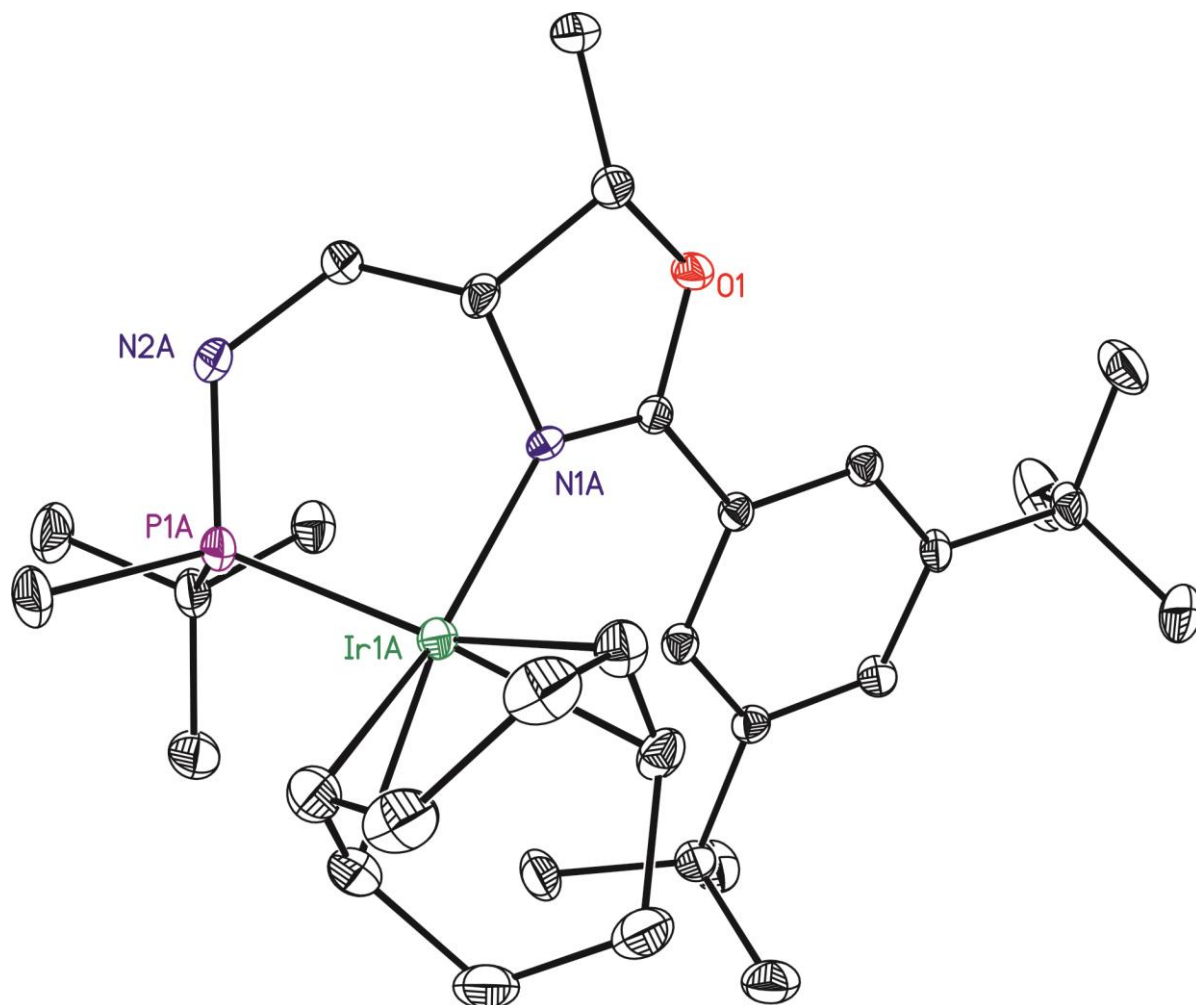

**Figure S2:** X-ray of (*R<sub>p</sub>*)-12, representing one of the two twins obtained by diffraction. ORTEP diagram shows thermal ellipsoids at 50% probability.

**Table S2:** Crystal data of (R<sub>p</sub>)-12.

|                                   |                                                                                                                               |
|-----------------------------------|-------------------------------------------------------------------------------------------------------------------------------|
| Empirical formula                 | C <sub>128</sub> H <sub>130</sub> B <sub>2</sub> F <sub>48</sub> Ir <sub>2</sub> N <sub>4</sub> O <sub>2</sub> P <sub>2</sub> |
| Formula weight                    | 3136.31                                                                                                                       |
| Temperature                       | 100(2)K                                                                                                                       |
| Wavelength                        | 0.71073 Å                                                                                                                     |
| Crystal system                    | triclinic                                                                                                                     |
| Space group                       | P 1                                                                                                                           |
| Unit cell dimensions              | a = 13.0950(8)Å      α = 103.0150(10)°.                                                                                       |
|                                   | b = 13.8097(8)Å      β = 99.0890(10)°.                                                                                        |
|                                   | c = 18.7211(11)Å      γ = 94.5280(10)°.                                                                                       |
| Volume                            | 3233.9(3) Å <sup>3</sup>                                                                                                      |
| Z                                 | 1                                                                                                                             |
| Density (calculated)              | 1.610 Mg/m <sup>3</sup>                                                                                                       |
| Absorption coefficient            | 2.202 mm <sup>-1</sup>                                                                                                        |
| F(000)                            | 1568                                                                                                                          |
| Crystal size                      | 0.100 x 0.100 x 0.040 mm <sup>3</sup>                                                                                         |
| Theta range for data collection   | 1.524 to 32.959°.                                                                                                             |
| Index ranges                      | -19<=h<=19,-20<=k<=21,-28<=l<=28                                                                                              |
| Reflections collected             | 118106                                                                                                                        |
| Independent reflections           | 118106[R(int) = ?]                                                                                                            |
| Completeness to theta =32.959°    | 94.0%                                                                                                                         |
| Absorption correction             | Multi-scan                                                                                                                    |
| Max. and min. transmission        | 0.74 and 0.45                                                                                                                 |
| Refinement method                 | Full-matrix least-squares on F <sup>2</sup>                                                                                   |
| Data / restraints / parameters    | 118106/ 69/ 1791                                                                                                              |
| Goodness-of-fit on F <sup>2</sup> | 1.072                                                                                                                         |
| Final R indices [I>2sigma(I)]     | R1 = 0.0273, wR2 = 0.0746                                                                                                     |
| R indices (all data)              | R1 = 0.0283, wR2 = 0.0753                                                                                                     |
| Flack parameter                   | x = -0.007(2)                                                                                                                 |
| Largest diff. peak and hole       | 2.138 and -0.722 e.Å <sup>-3</sup>                                                                                            |

#### 4. Stereochemical course of the asymmetric hydrogenation.

Asymmetric hydrogenation of allylic amine takes place in accordance with the Andersson quadrant model. Coordination of the olefin towards an  $[\text{IrH}_2(\text{N,P})(\text{Solvent})_2]^+$  complex takes place in the same equatorial plane as the chiral bidentate N,P-ligand *cis* to nitrogen and *trans* to phosphorus. The resultant quadrant model rationalizes whether the steric bulk of the ligand is above or below the N-Ir-P plane. To minimize steric interactions, the substrate then preferentially coordinates with the smallest olefin substituent, in this case the vinylic proton, to the hindered environment and thus coordinates preferentially by one of the enantiotopic faces, in this case the *pro-R* face.

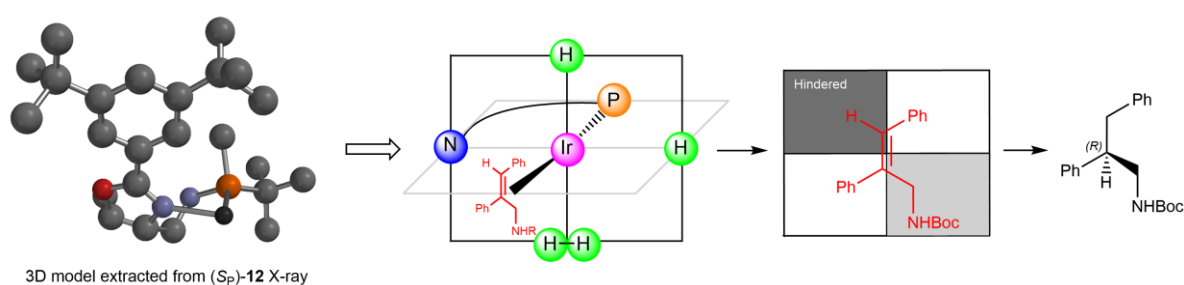

See references:

1. C. Hedberg, K. Källström, P. Brandt, L. K. Hansen, P. G. Andersson, *J. Am. Chem. Soc.* **2006**, *128*, 2995–3001.
2. T. L. Church, T. Rasmussen, P. G. Andersson, *Organometallics* **2010**, *29*, 6769–6781.

## 5. $^1\text{H-NMR}$ , $^{13}\text{C-NMR}$ and $^{31}\text{P-NMR}$ spectra

$^1\text{H-NMR}$  (400 MHz,  $\text{CDCl}_3$ ):

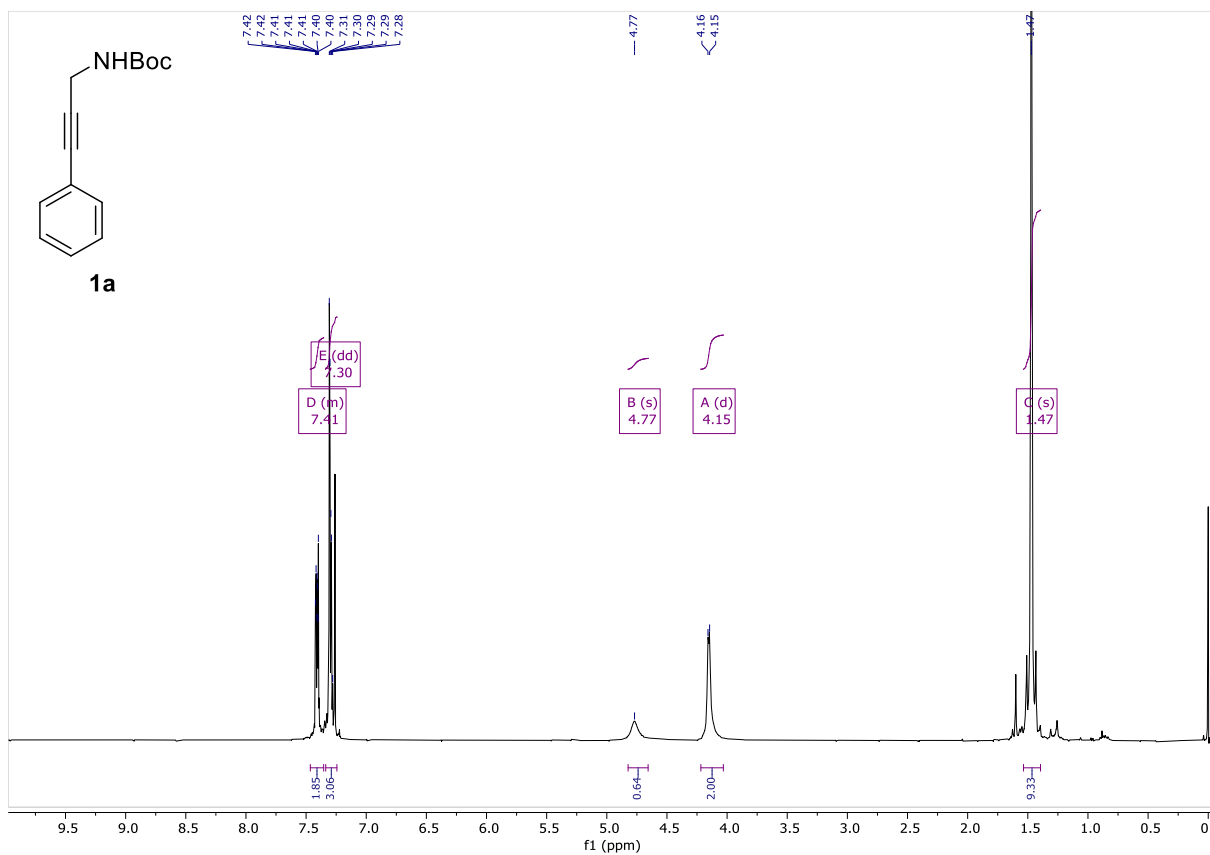

$^1\text{H-NMR}$  (400 MHz,  $\text{CDCl}_3$ ):

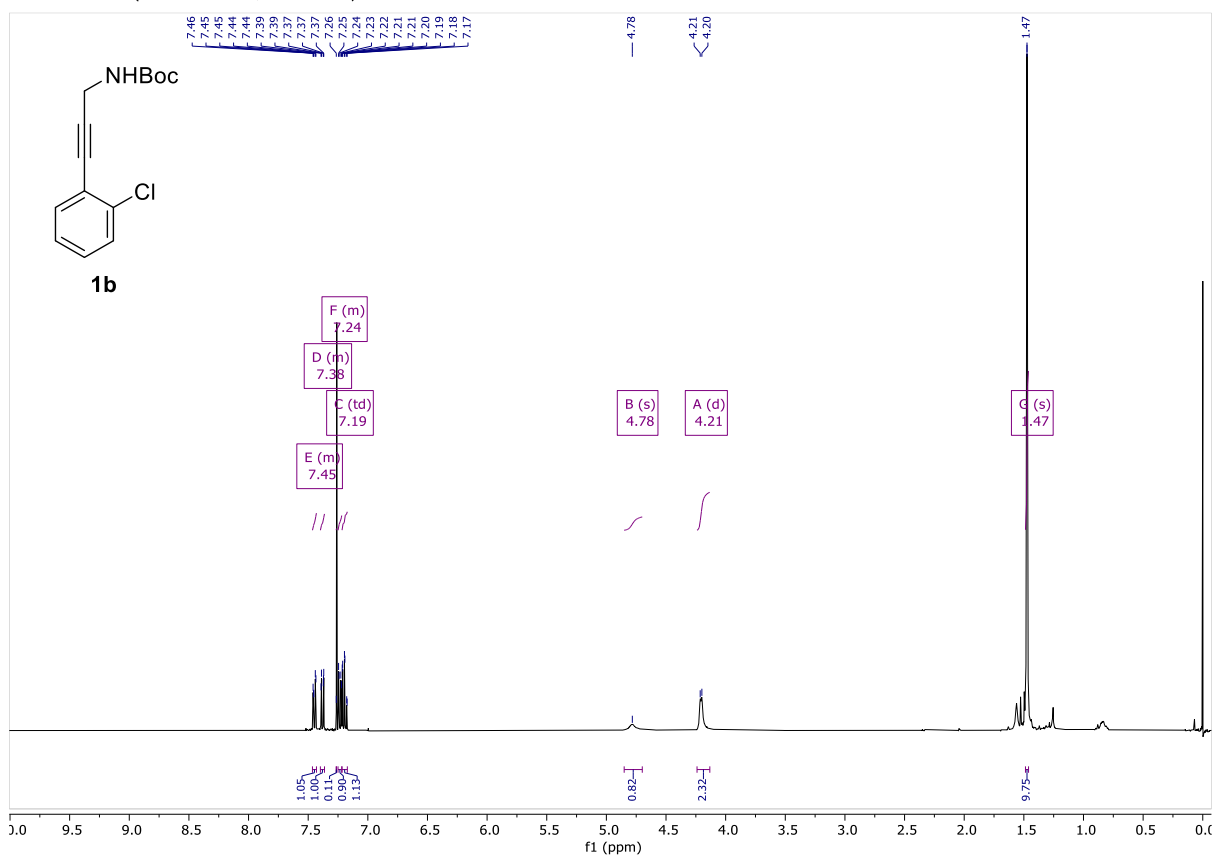

$^1\text{H-NMR}$  (400 MHz,  $\text{CDCl}_3$ ):

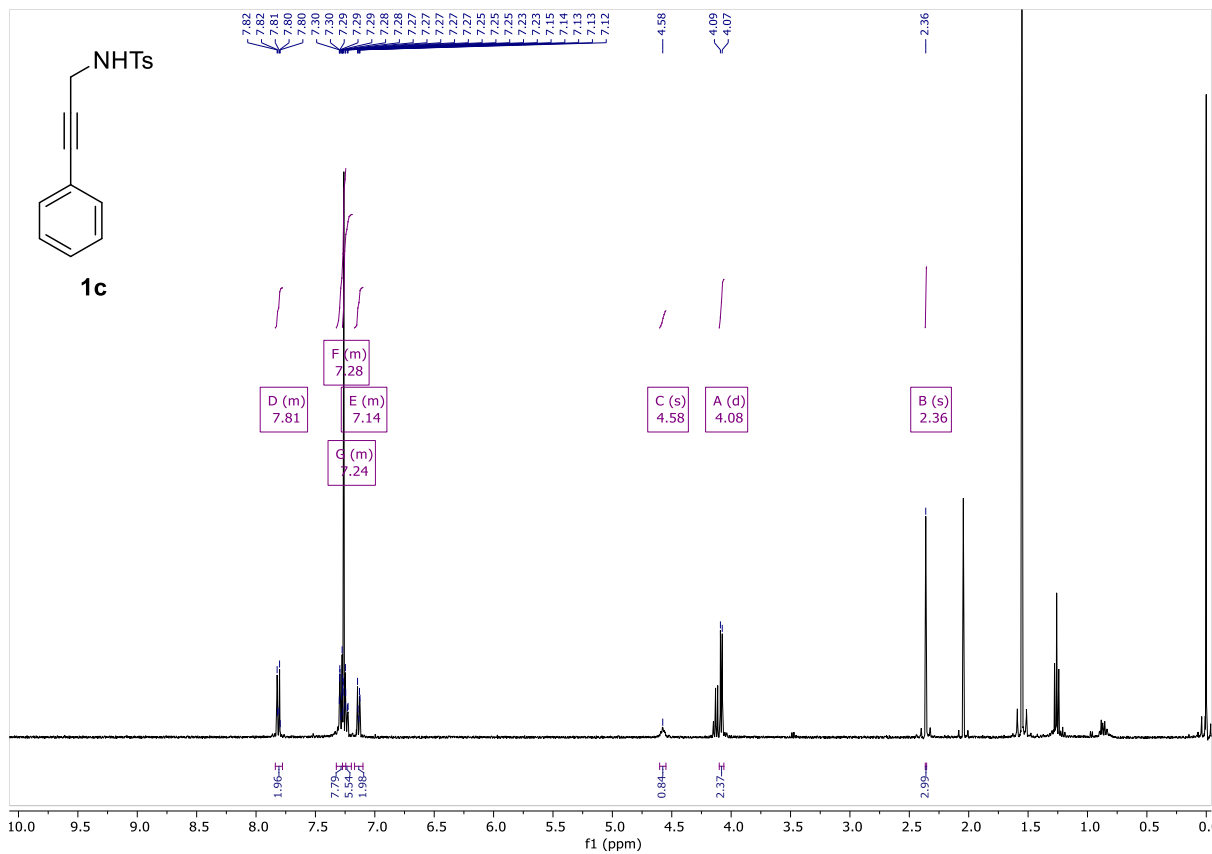

$^1\text{H-NMR}$  (400 MHz,  $\text{CDCl}_3$ ):

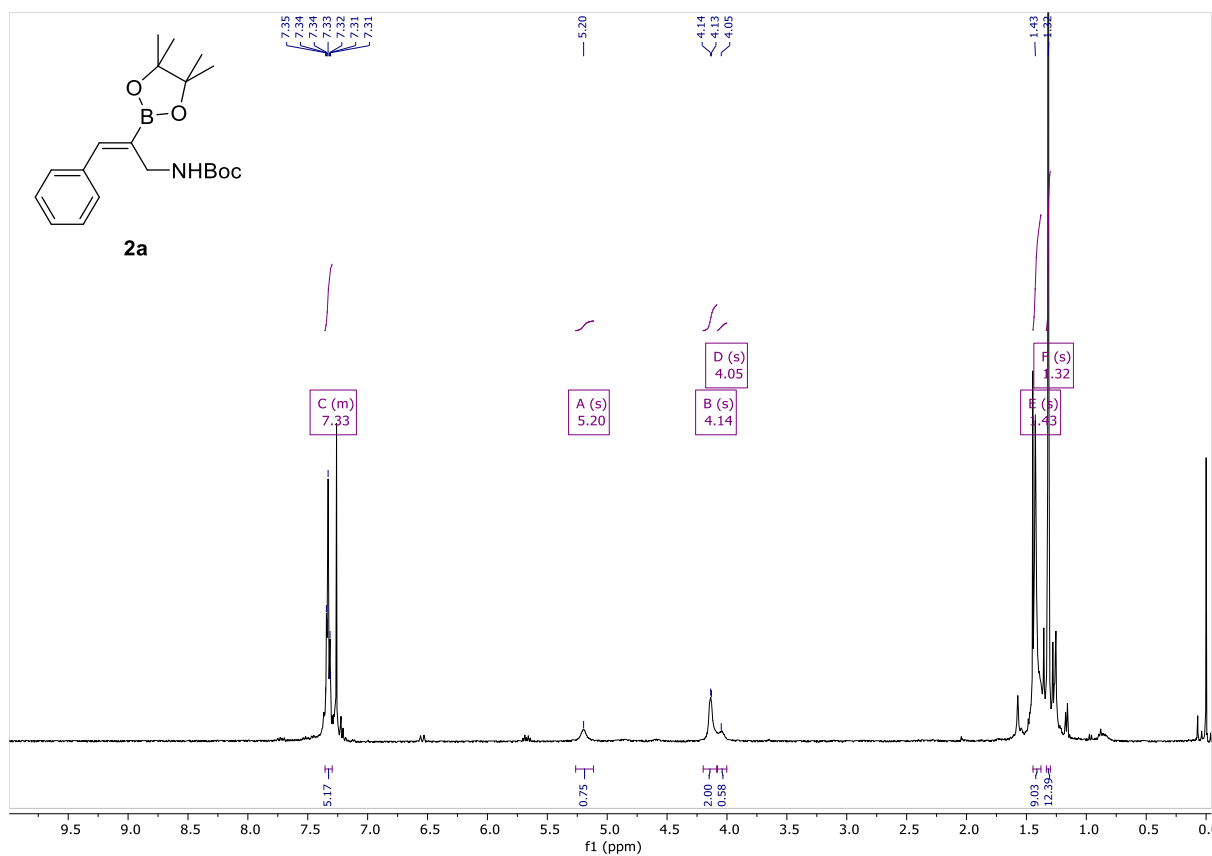



$^{13}\text{C}$ -NMR (101 MHz,  $\text{CDCl}_3$ ):

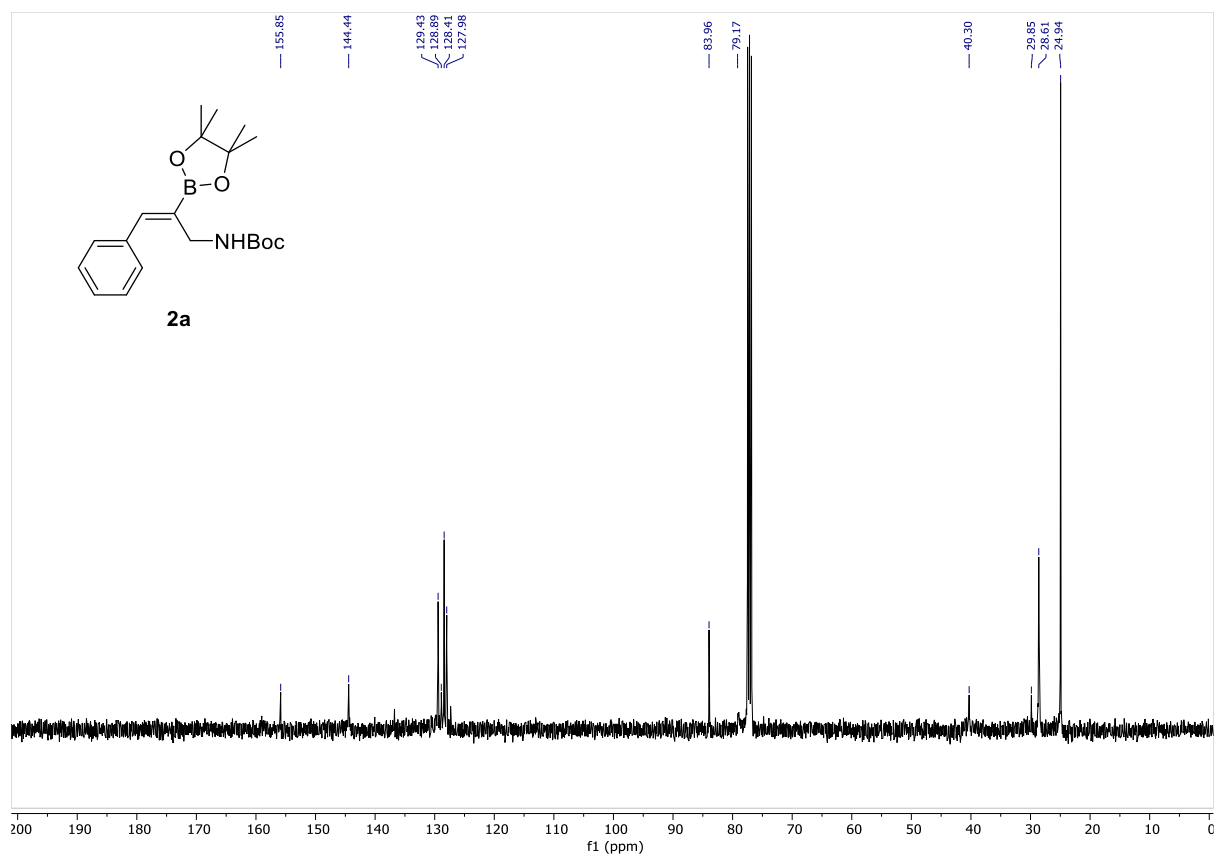

$^1\text{H}$ -NMR (400 MHz,  $\text{CDCl}_3$ ):

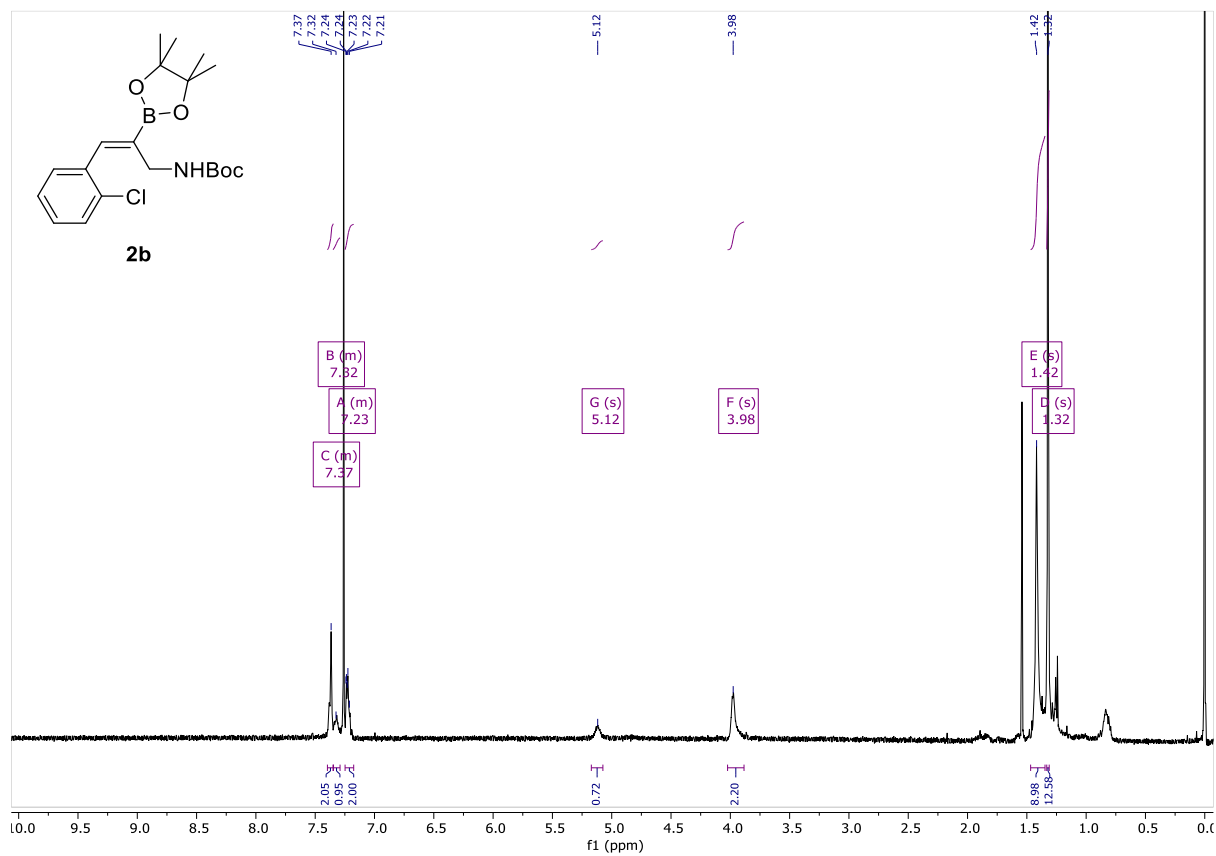

$^{13}\text{C}$ -NMR (101 MHz,  $\text{CDCl}_3$ ):

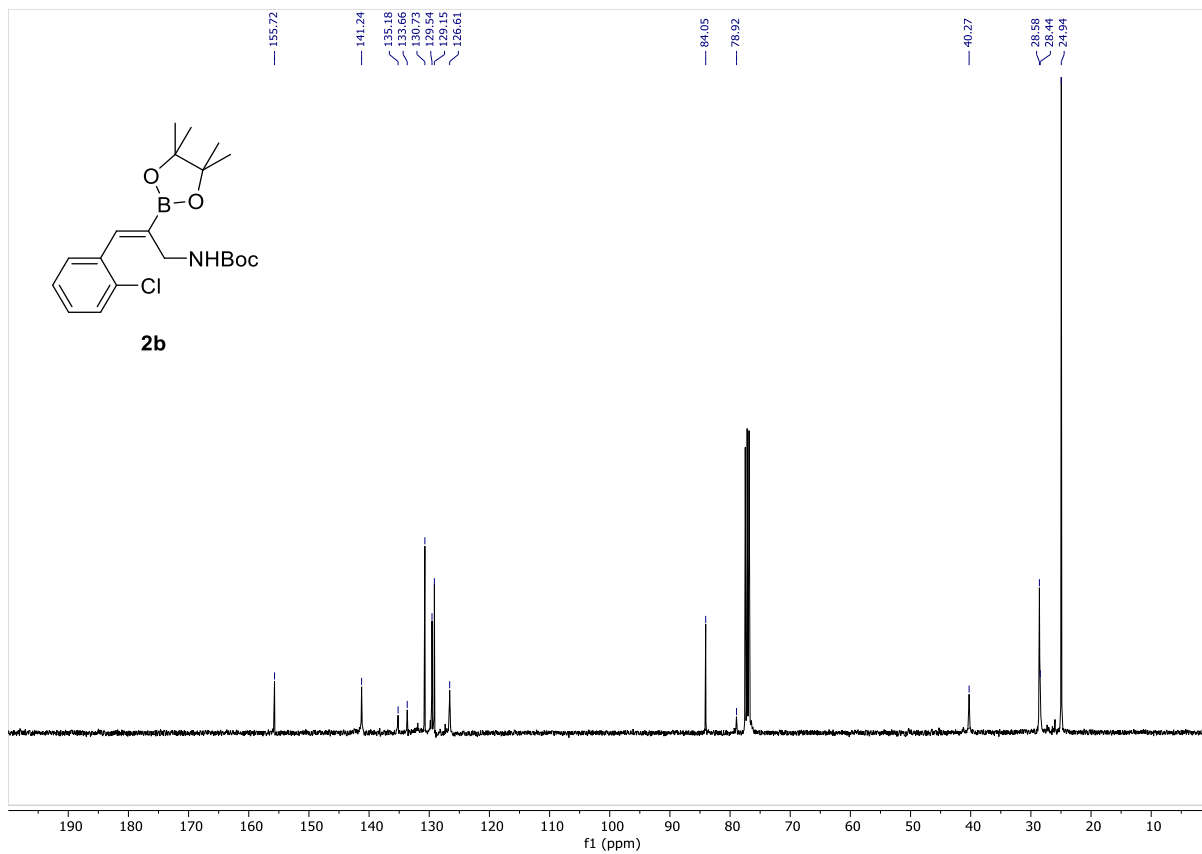

$^1\text{H}$ -NMR (400 MHz,  $\text{CDCl}_3$ ):

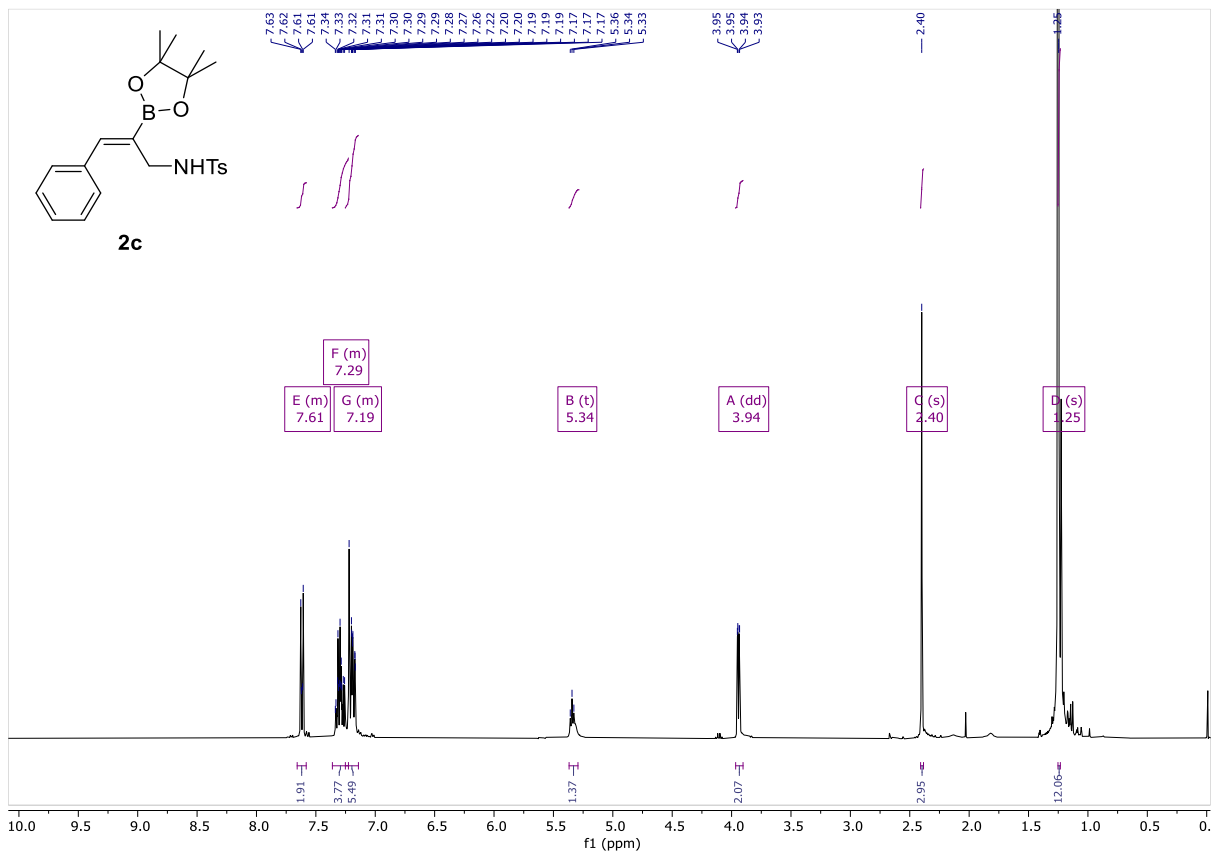

$^{13}\text{C-NMR}$  (101 MHz,  $\text{CDCl}_3$ ):

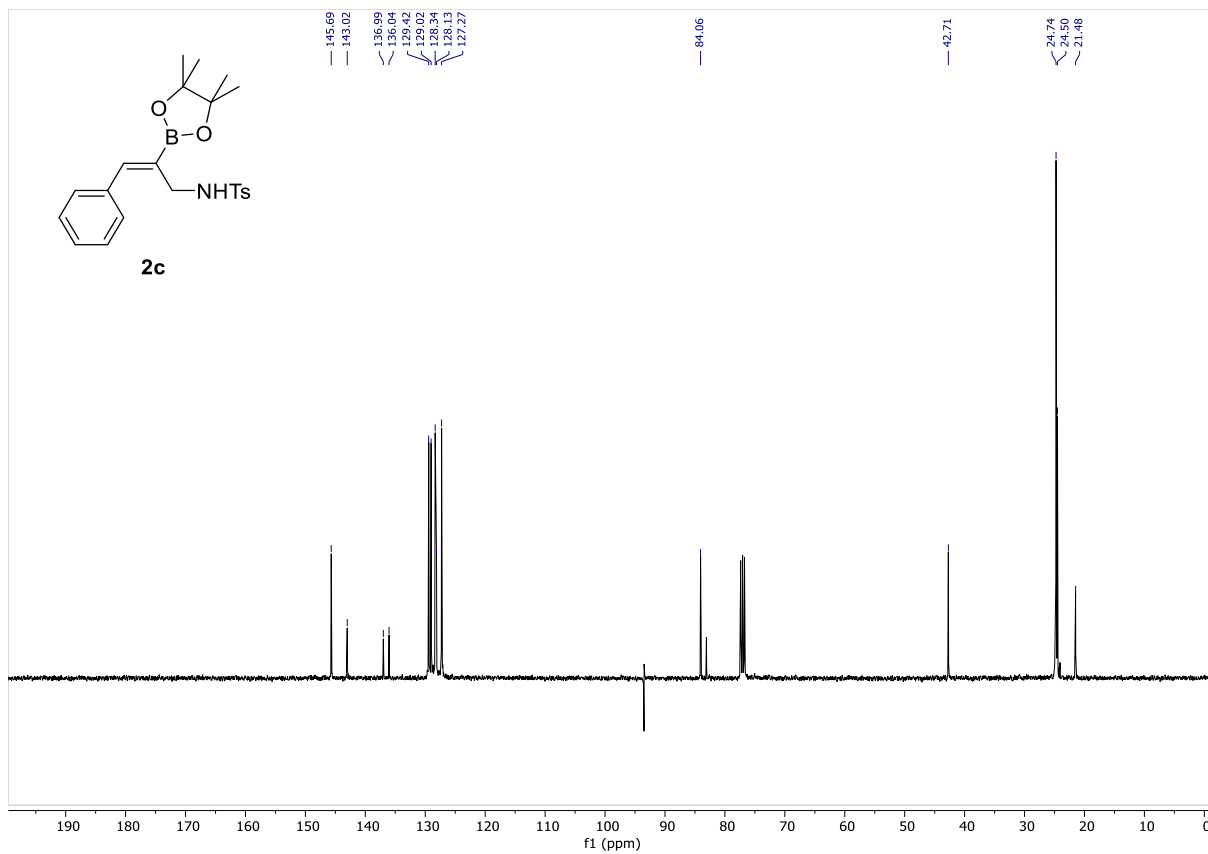

$^1\text{H-NMR}$  (400 MHz,  $\text{CDCl}_3$ ):

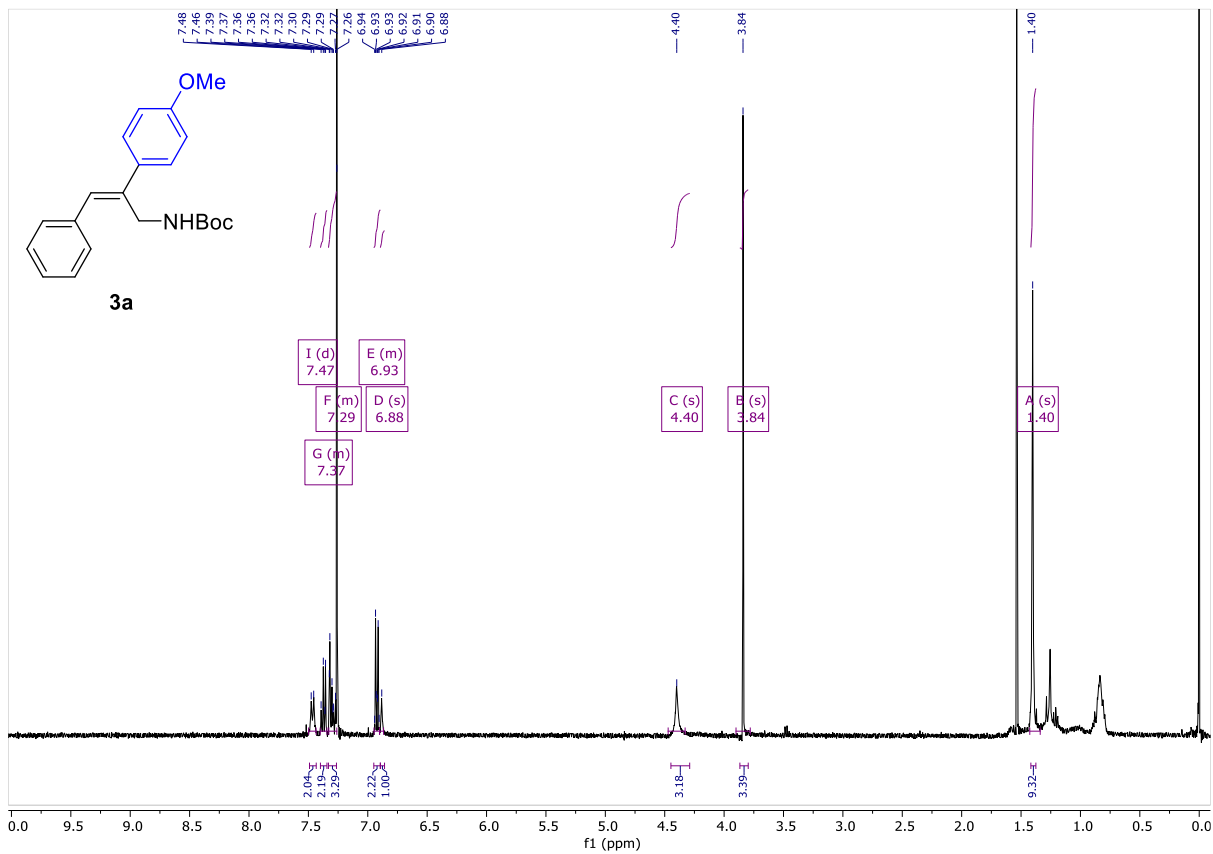

$^{13}\text{C-NMR}$  (101 MHz,  $\text{CDCl}_3$ ):

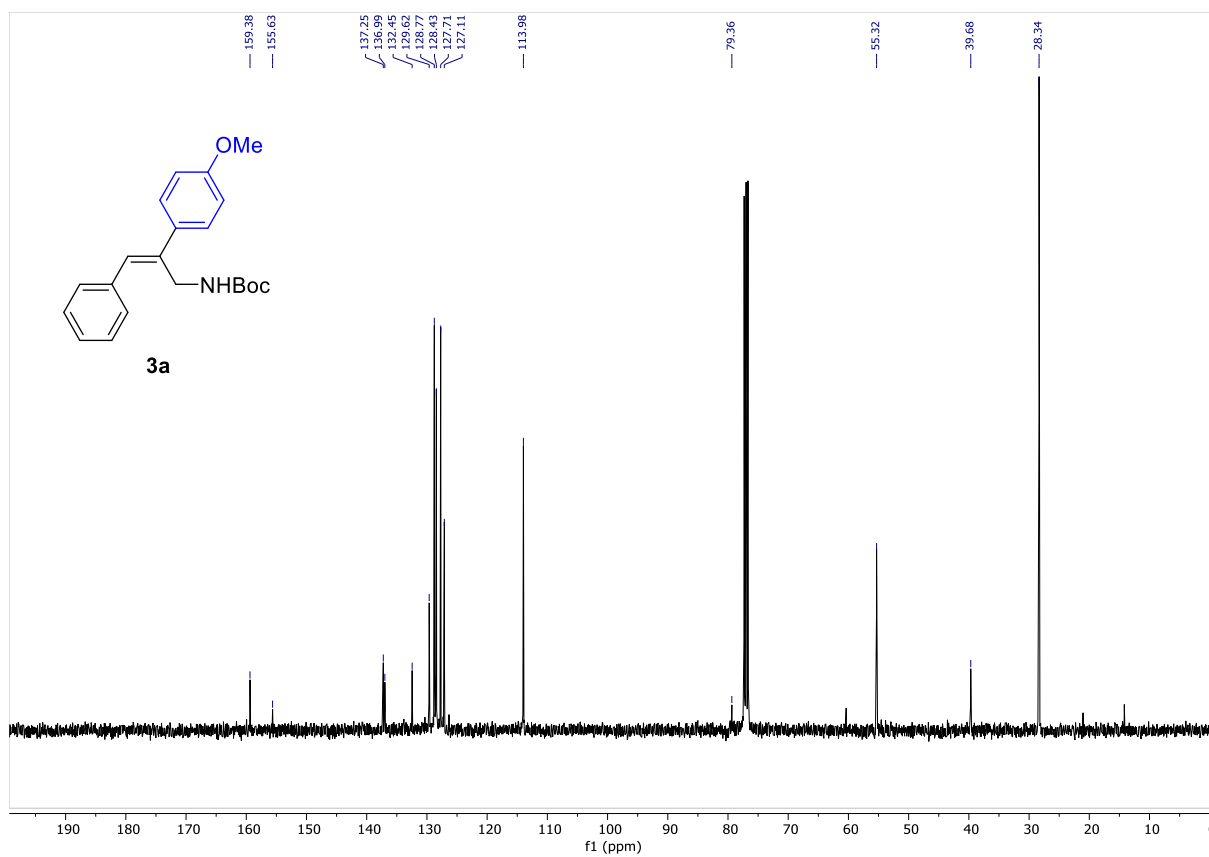

$^1\text{H-NMR}$  (400 MHz,  $\text{CDCl}_3$ ):

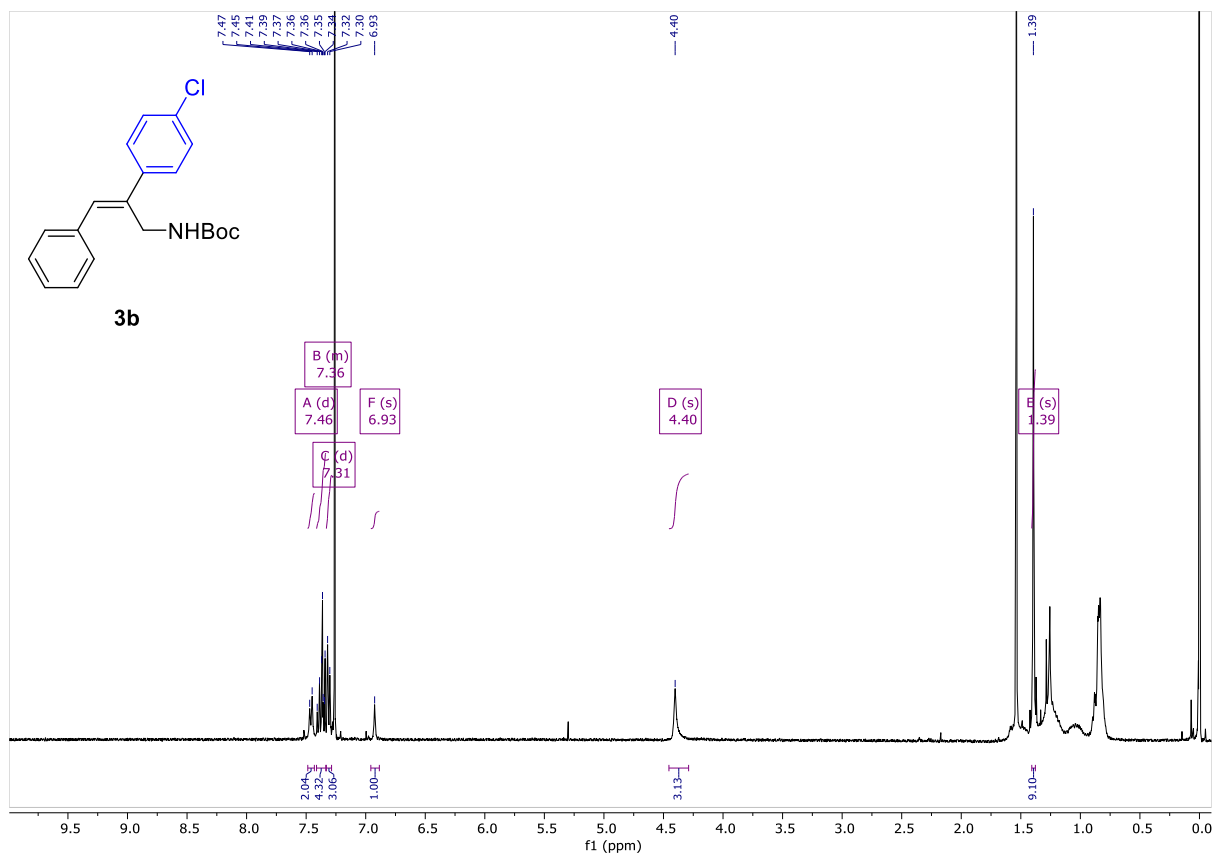

$^{13}\text{C}$ -NMR (101 MHz,  $\text{CDCl}_3$ ):

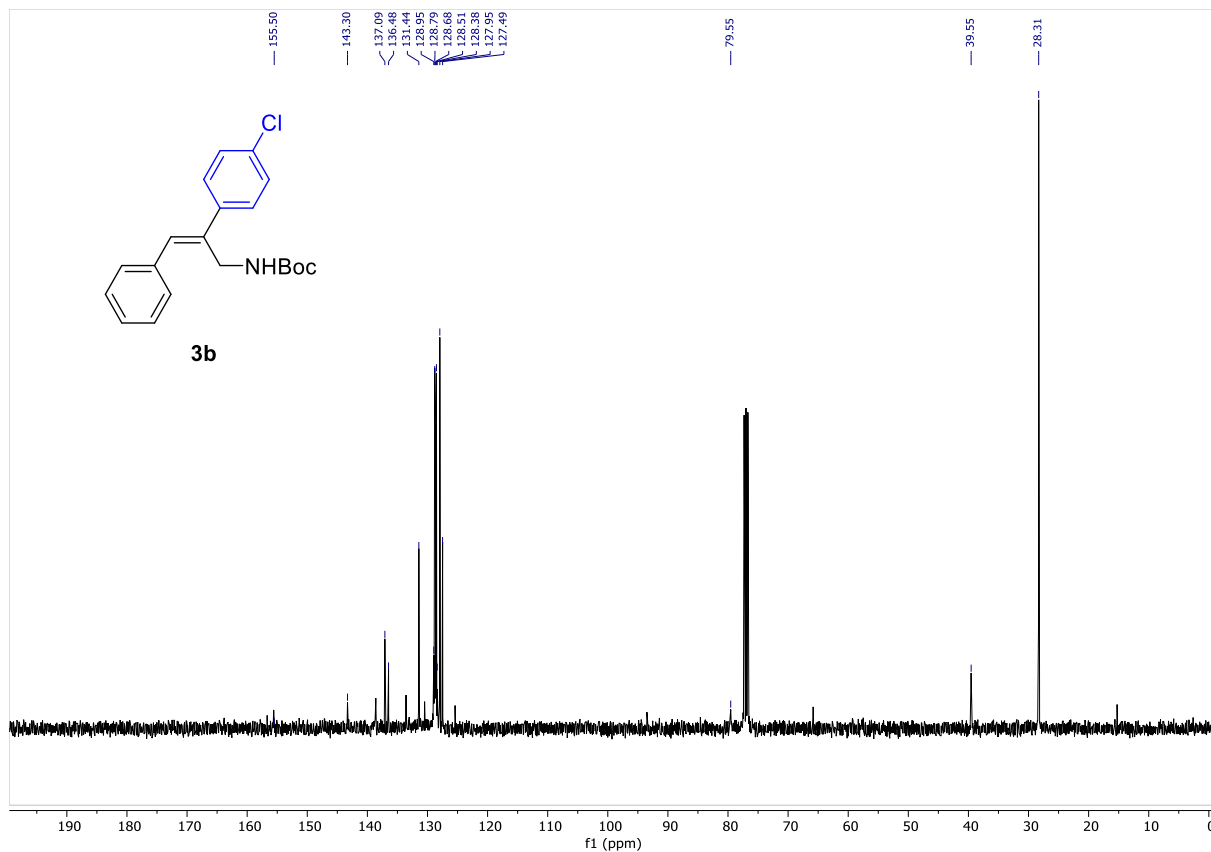

$^1\text{H}$ -NMR (400 MHz,  $\text{CDCl}_3$ ):

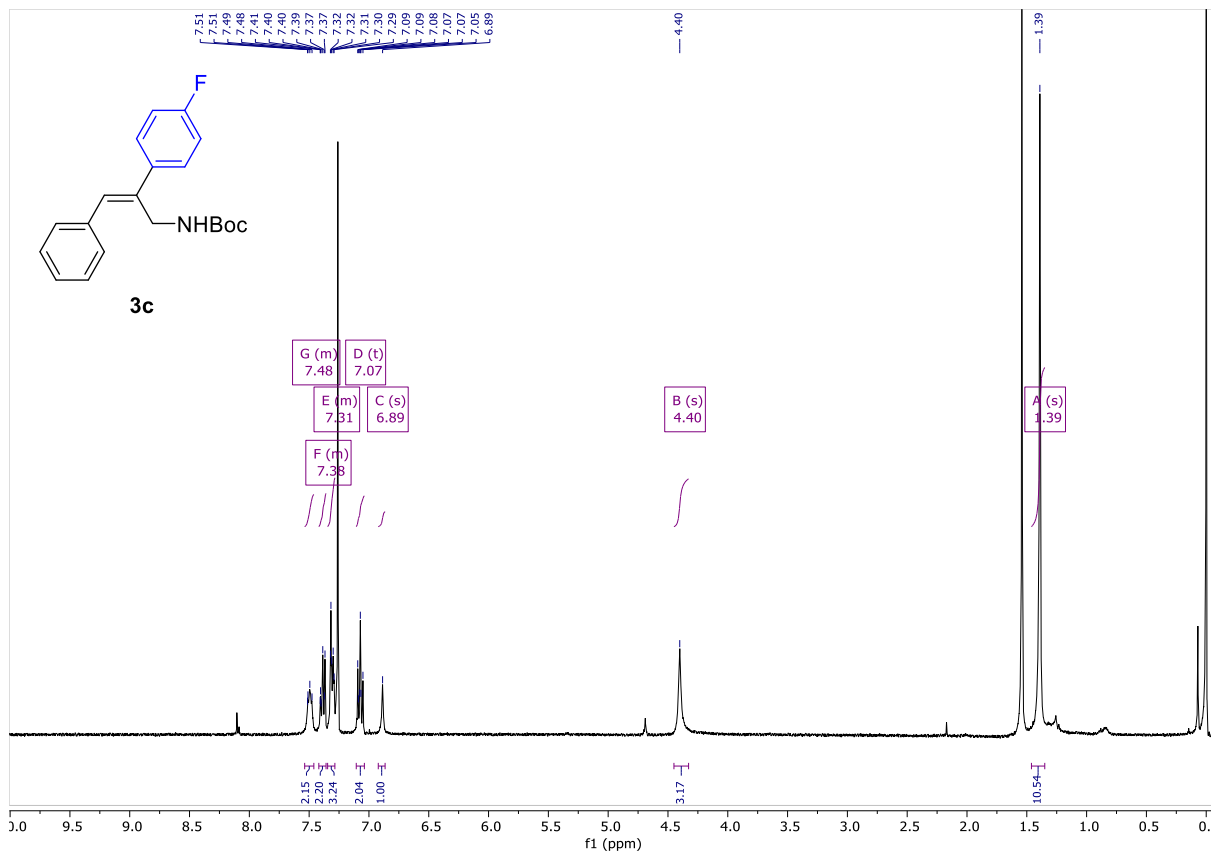

$^{13}\text{C-NMR}$  (101 MHz,  $\text{CDCl}_3$ ):

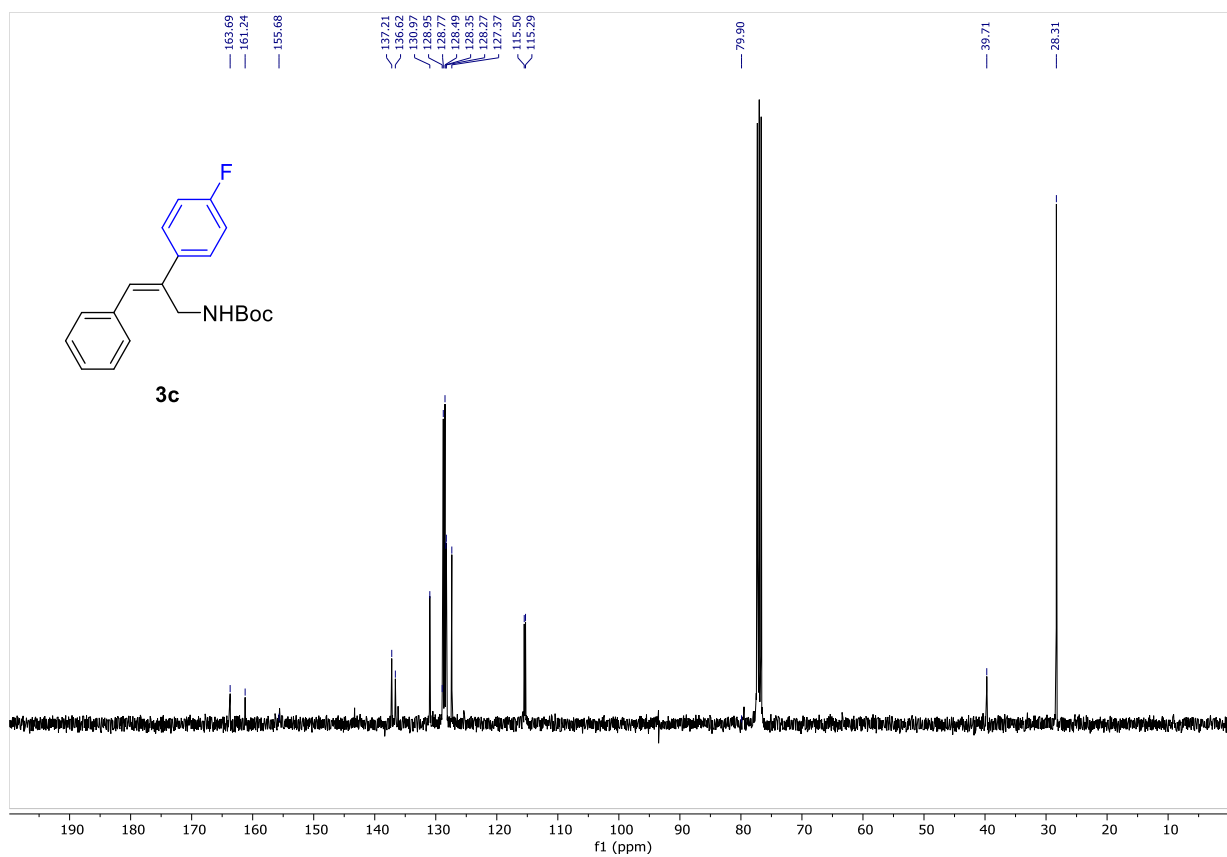

$^1\text{H-NMR}$  (400 MHz,  $\text{CDCl}_3$ ):

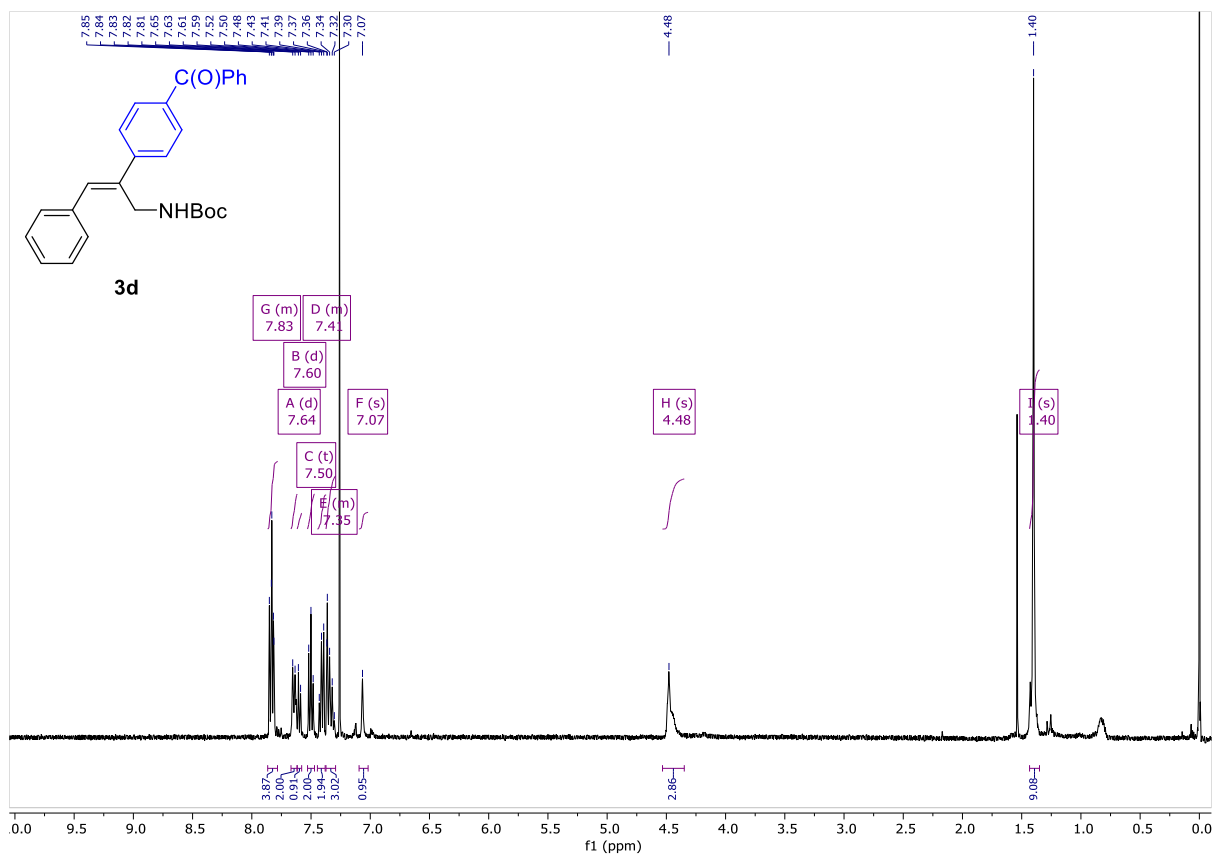

$^{13}\text{C}$ -NMR (101 MHz,  $\text{CDCl}_3$ ):

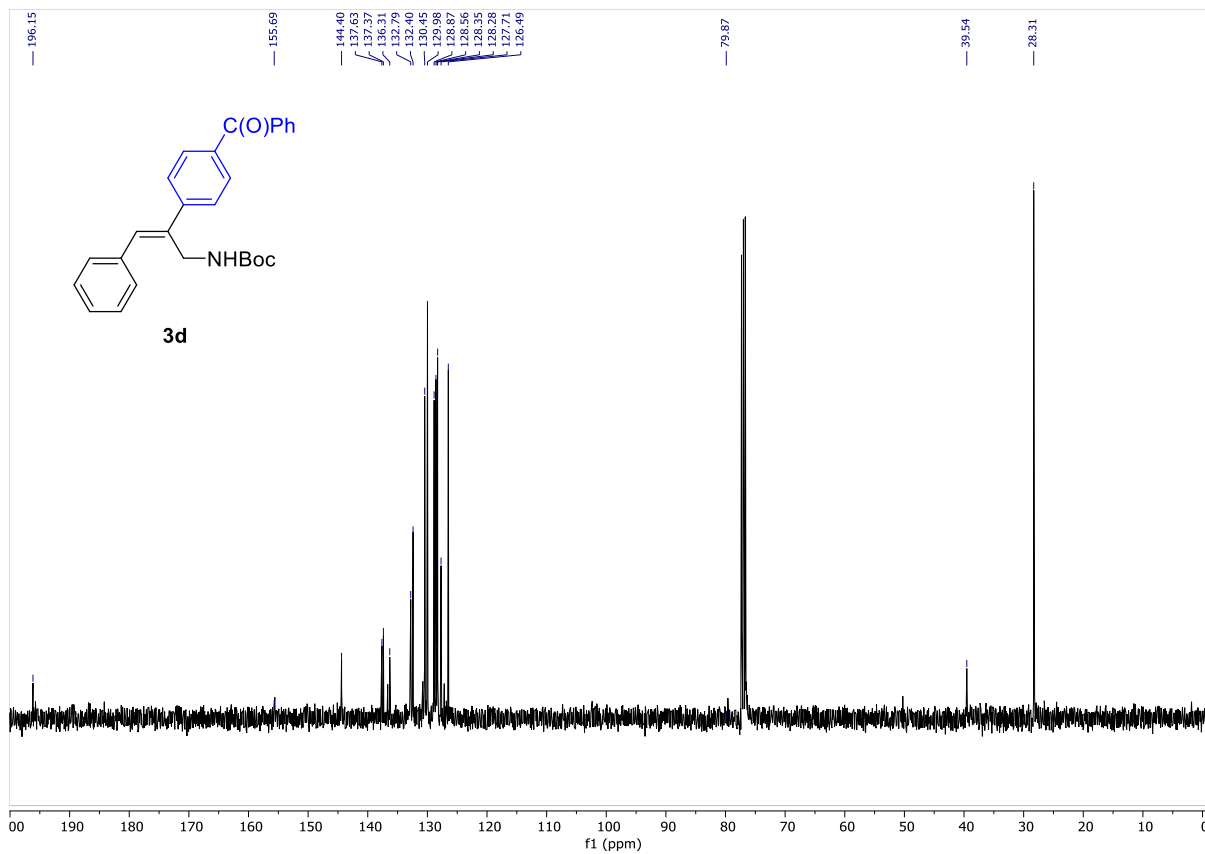

$^1\text{H}$ -NMR (400 MHz,  $\text{CDCl}_3$ ):

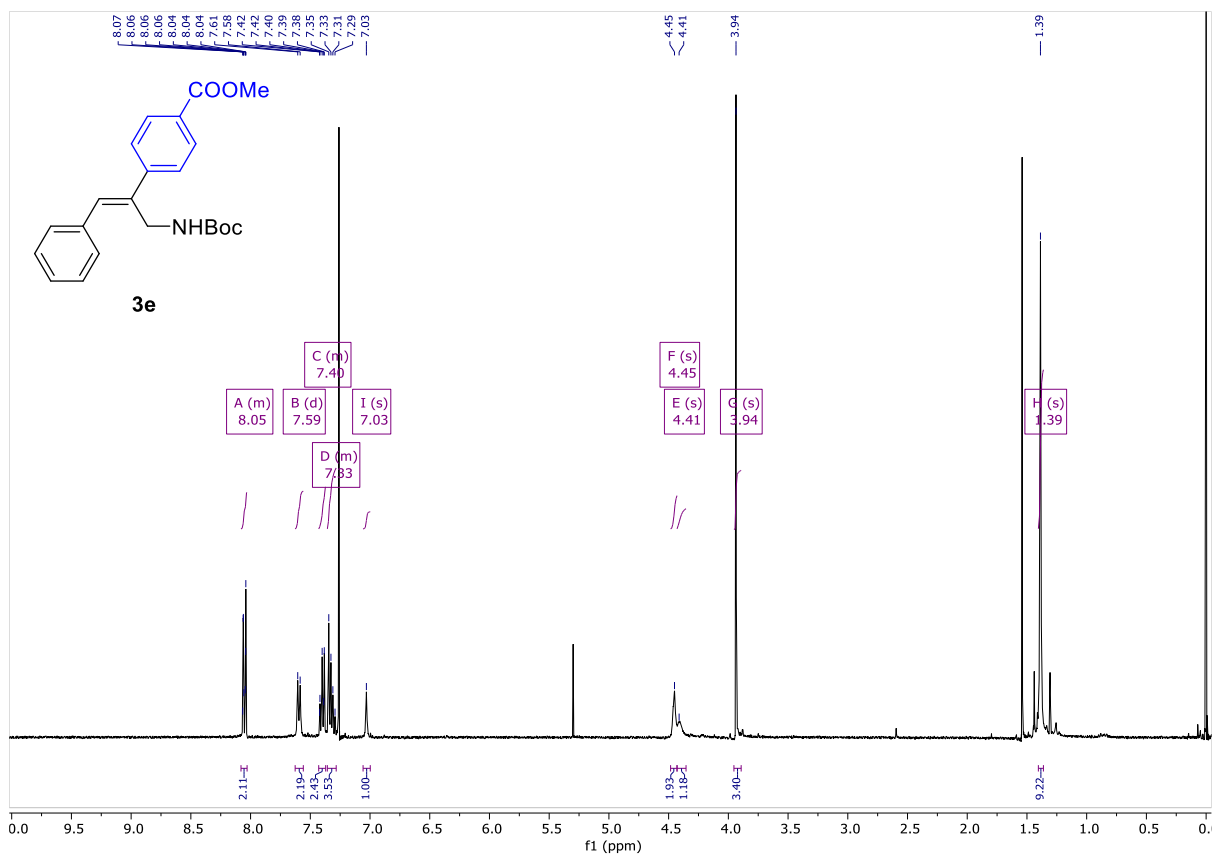

$^{13}\text{C}$ -NMR (101 MHz,  $\text{CDCl}_3$ ):

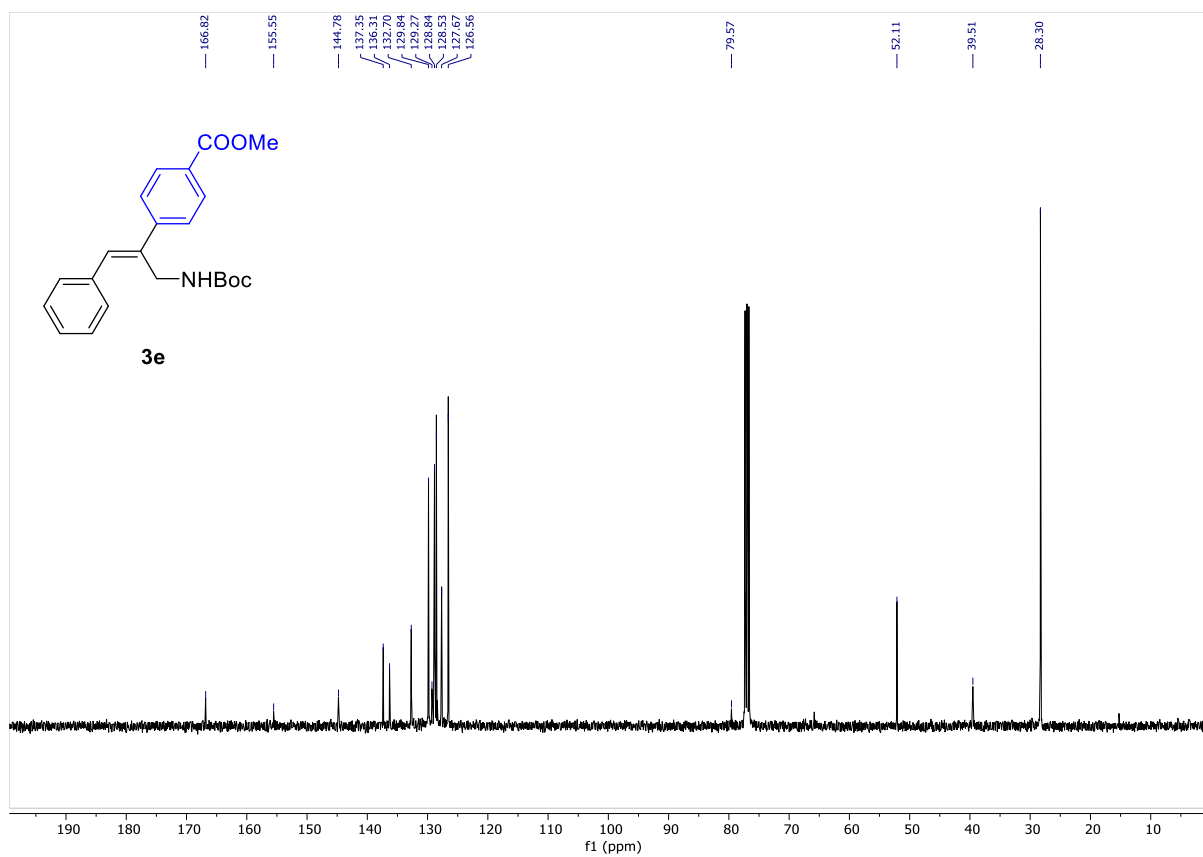

$^1\text{H}$ -NMR (400 MHz,  $\text{CDCl}_3$ ):

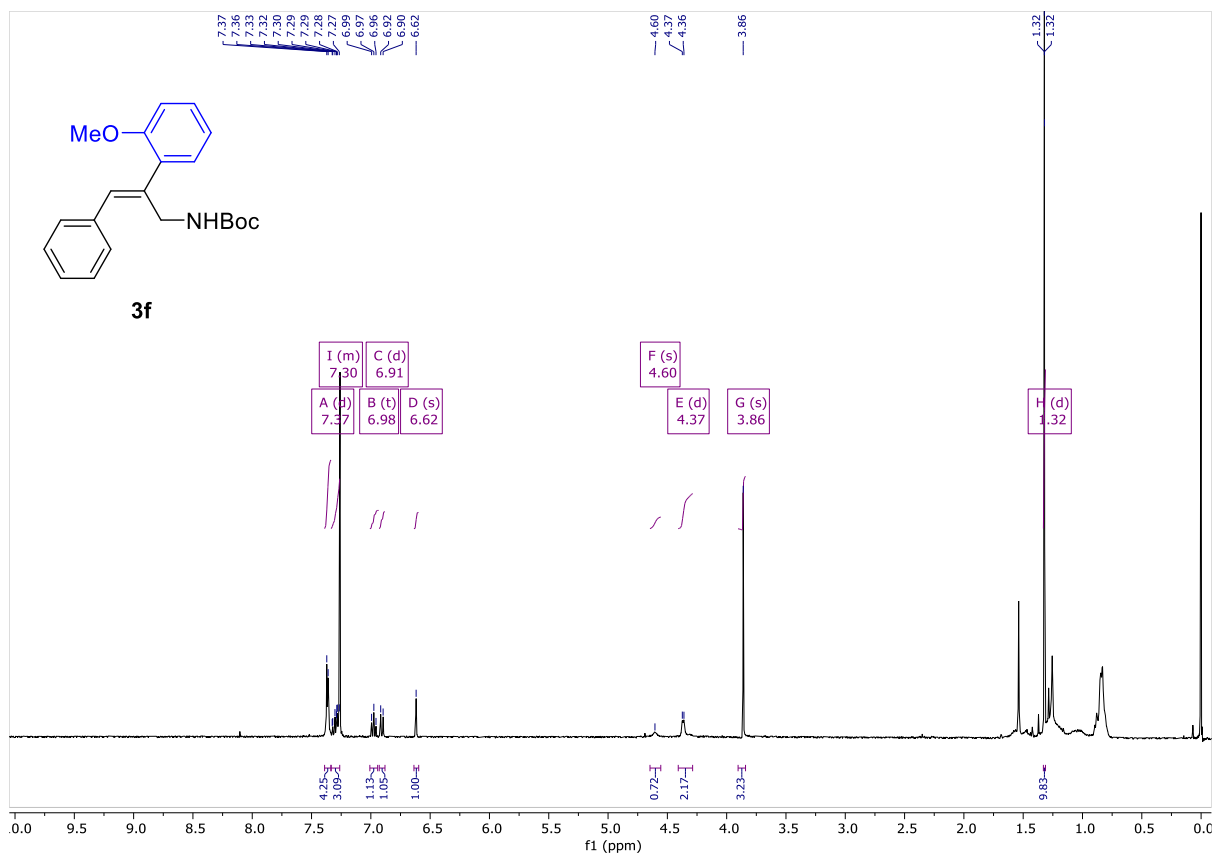



$^{13}\text{C}$ -NMR (101 MHz,  $\text{CDCl}_3$ ):

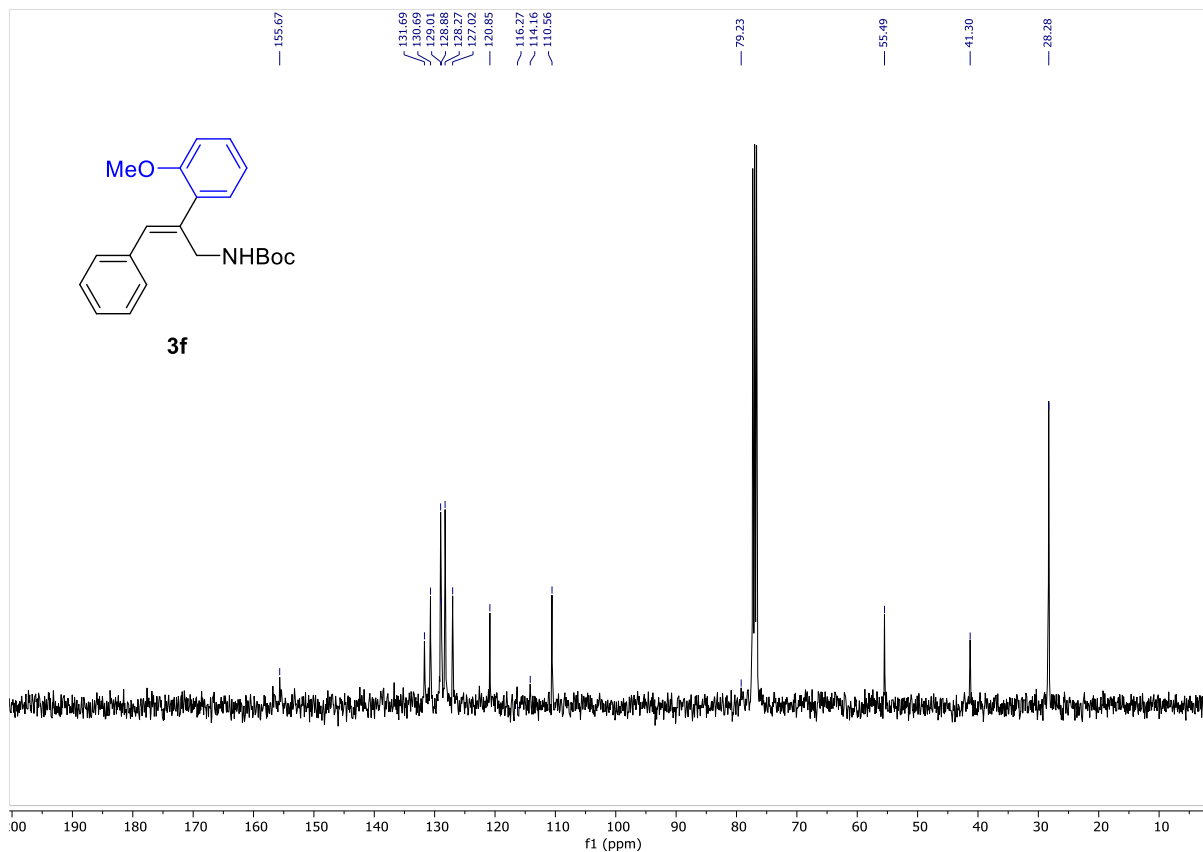

$^1\text{H}$ -NMR (400 MHz,  $\text{CDCl}_3$ ):

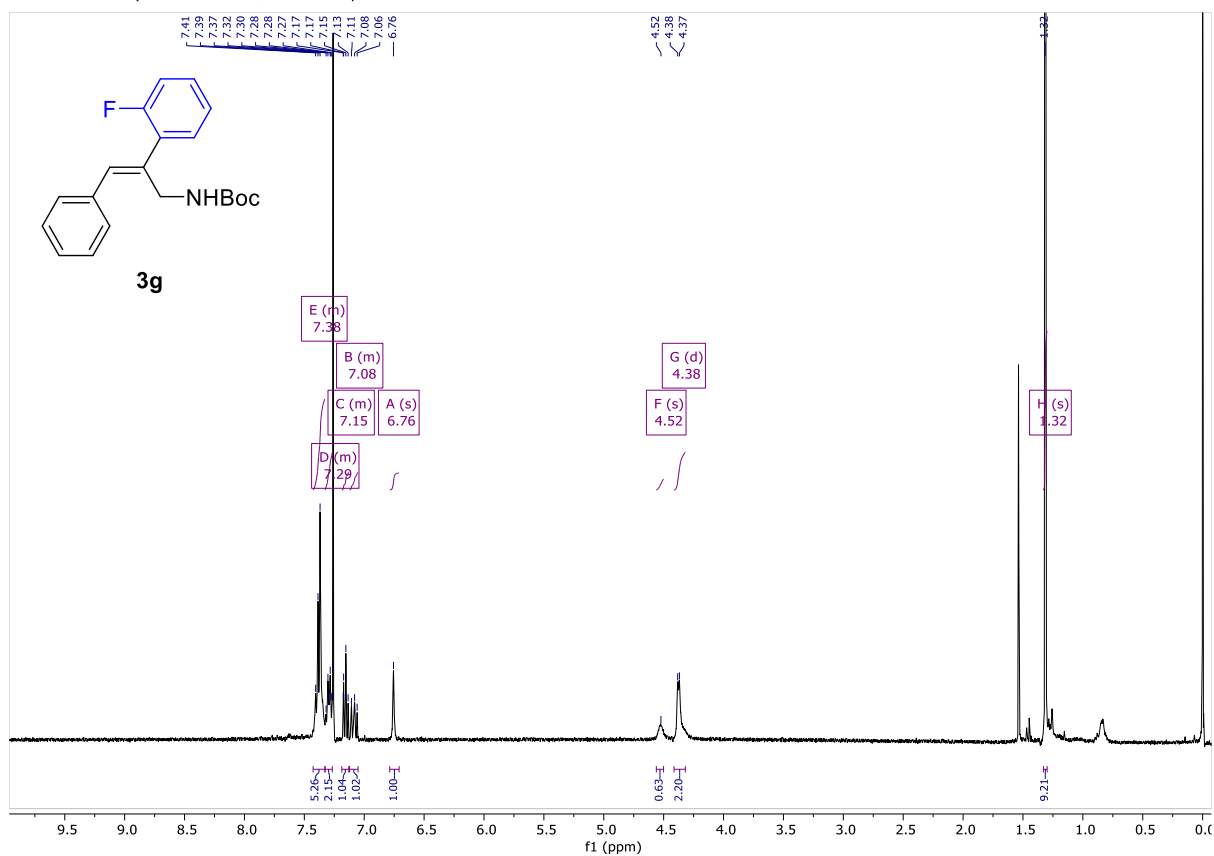

$^{13}\text{C-NMR}$  (101 MHz,  $\text{CDCl}_3$ ):

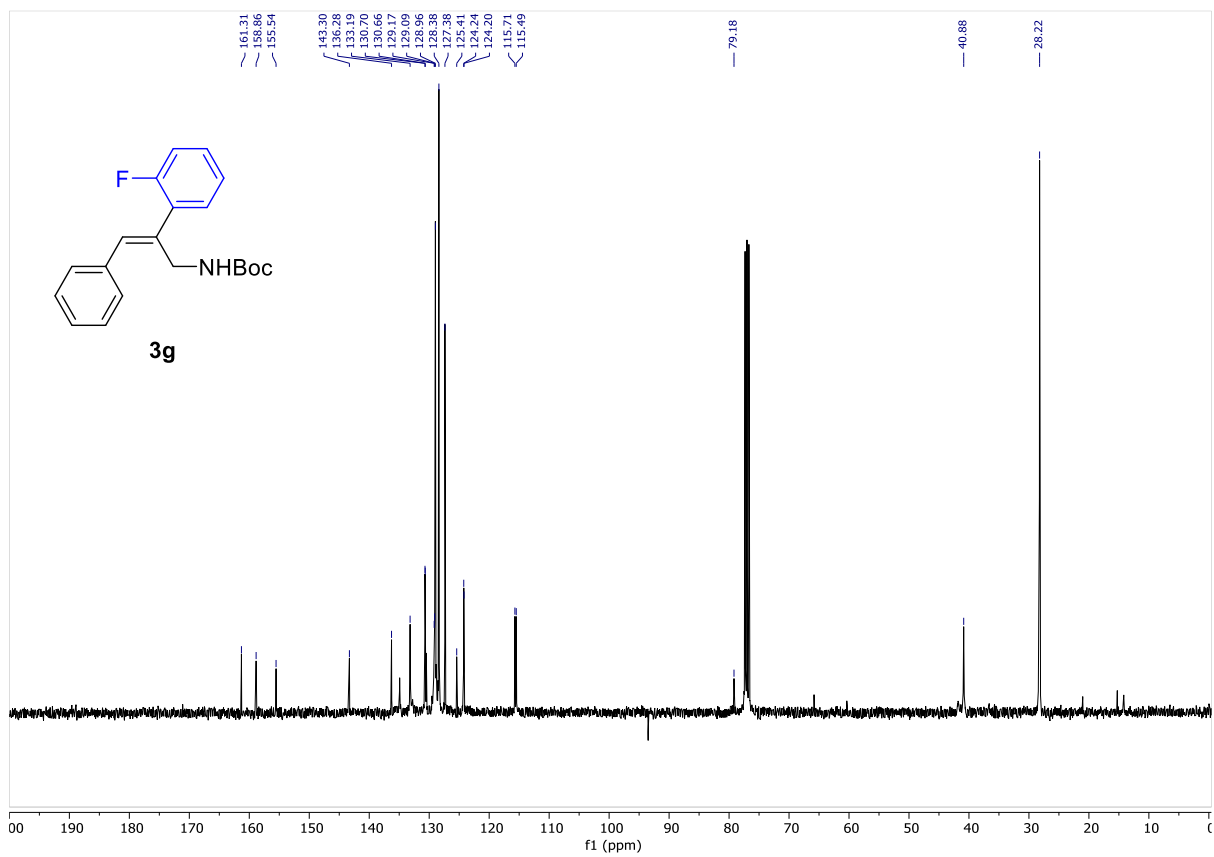

$^1\text{H-NMR}$  (400 MHz,  $\text{CDCl}_3$ ):

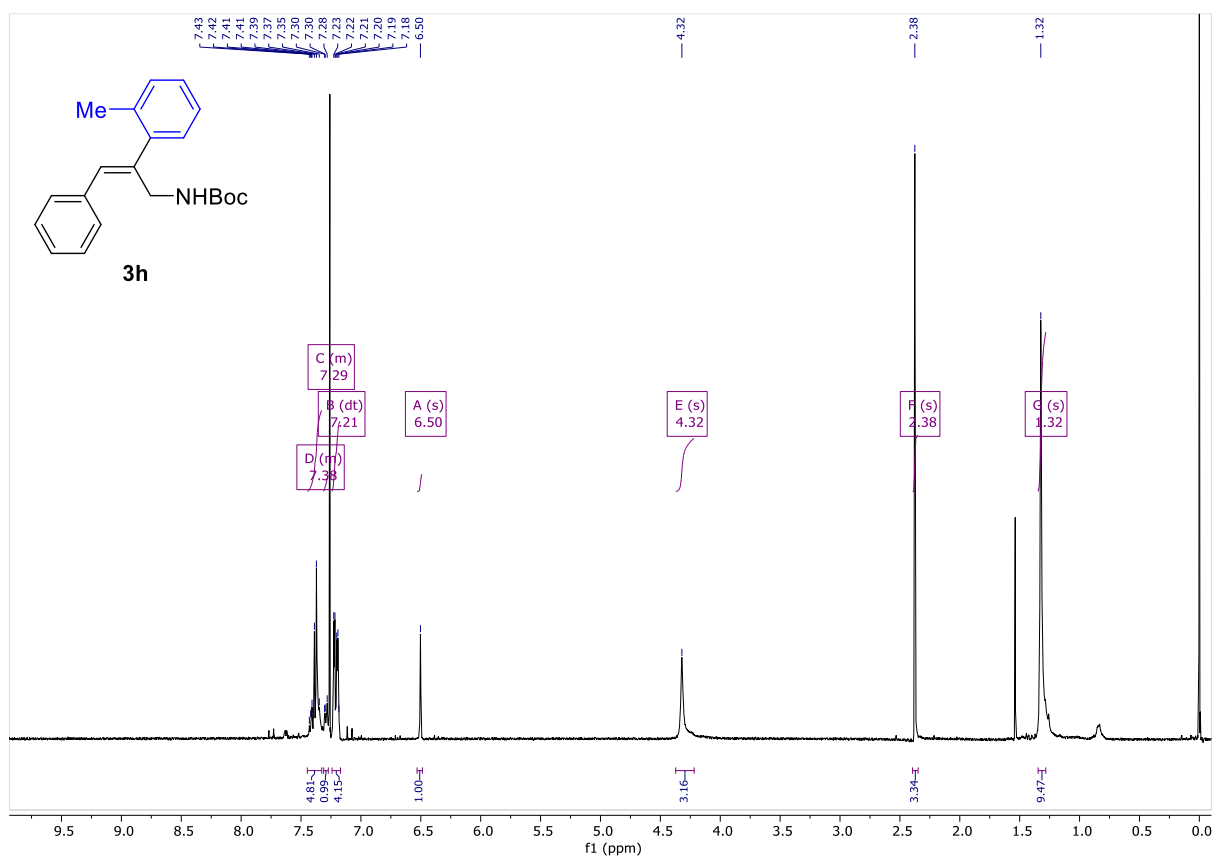

$^{13}\text{C-NMR}$  (101 MHz,  $\text{CDCl}_3$ ):

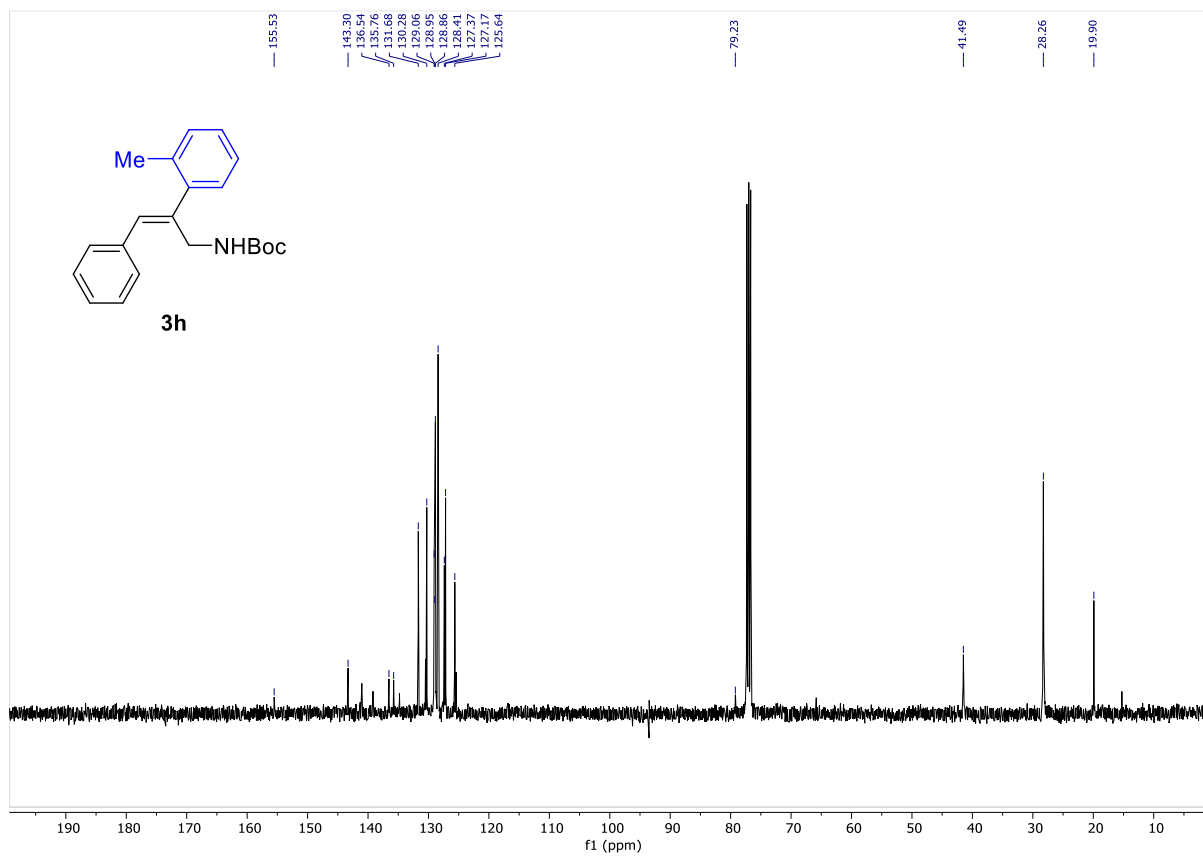

$^1\text{H-NMR}$  (400 MHz,  $\text{CDCl}_3$ ):

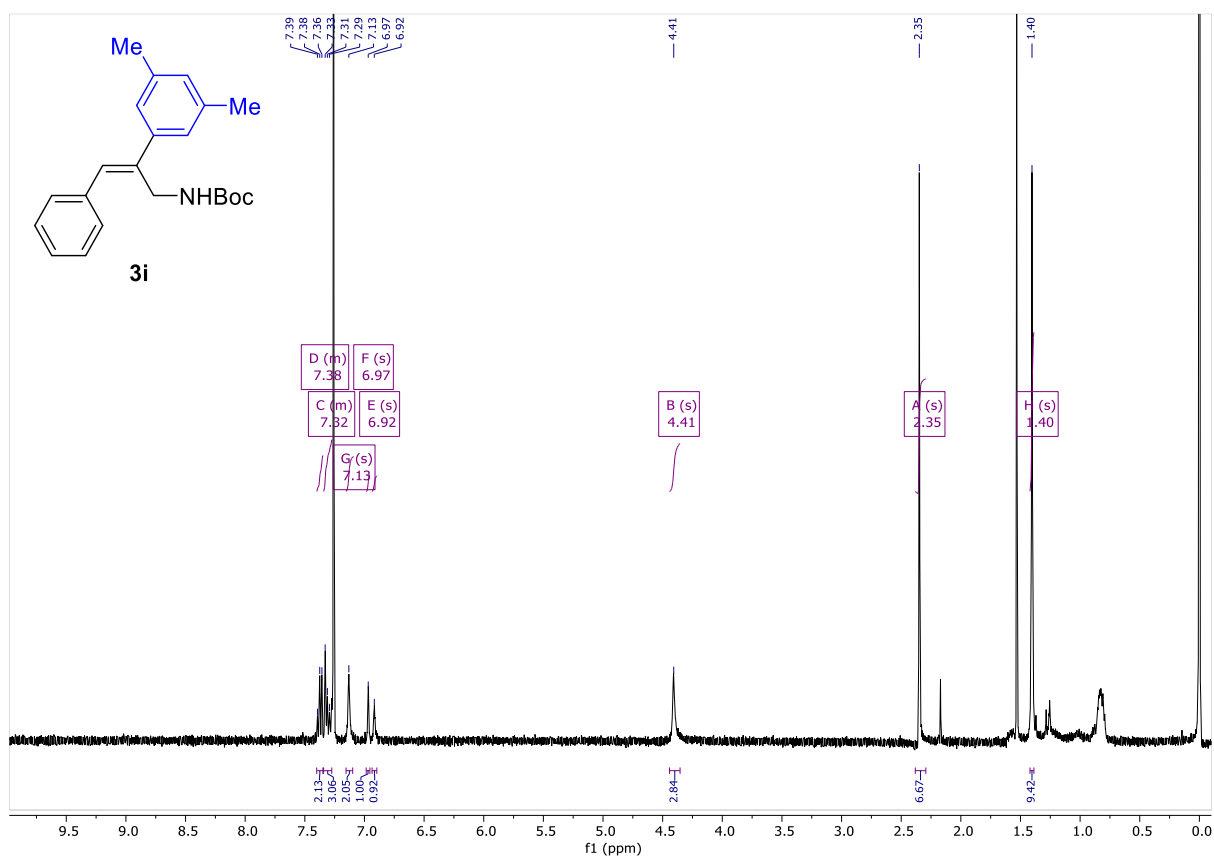

$^{13}\text{C-NMR}$  (101 MHz,  $\text{CDCl}_3$ ):

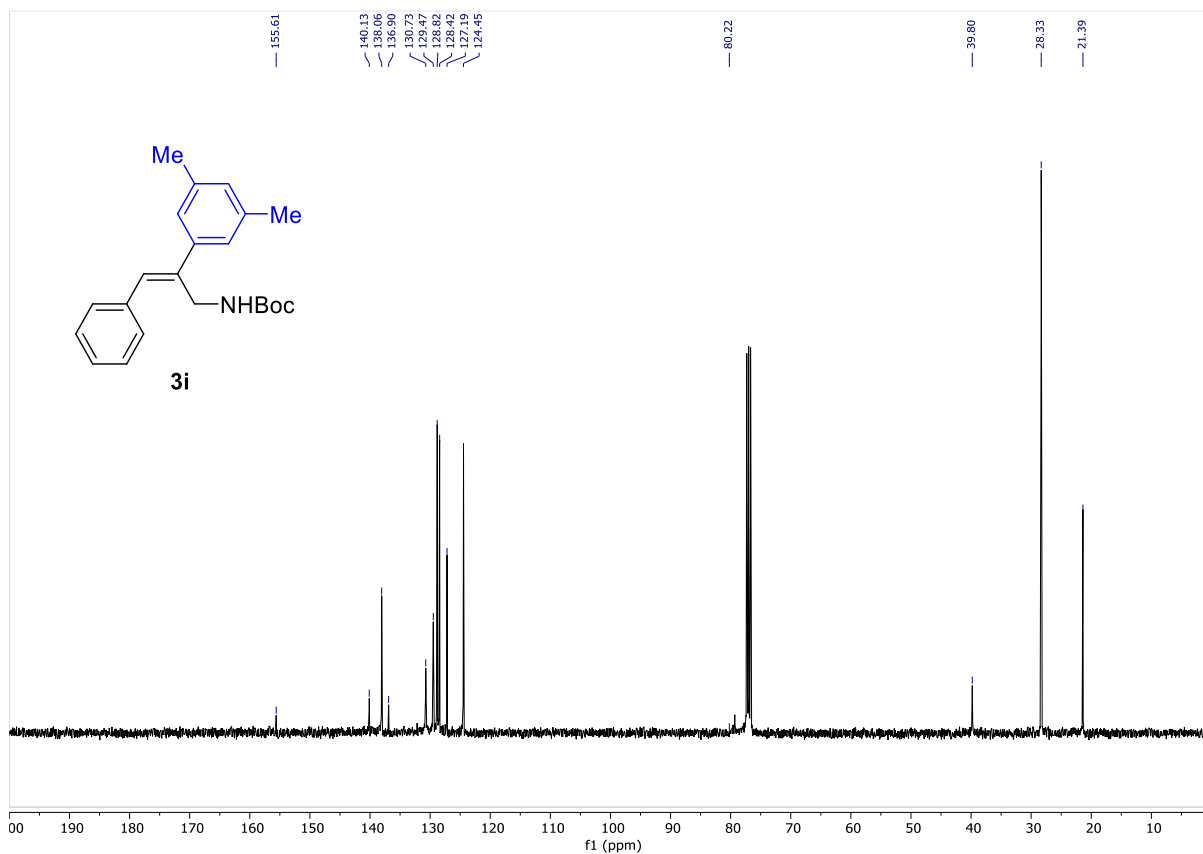

$^1\text{H-NMR}$  (400 MHz,  $\text{CDCl}_3$ ):

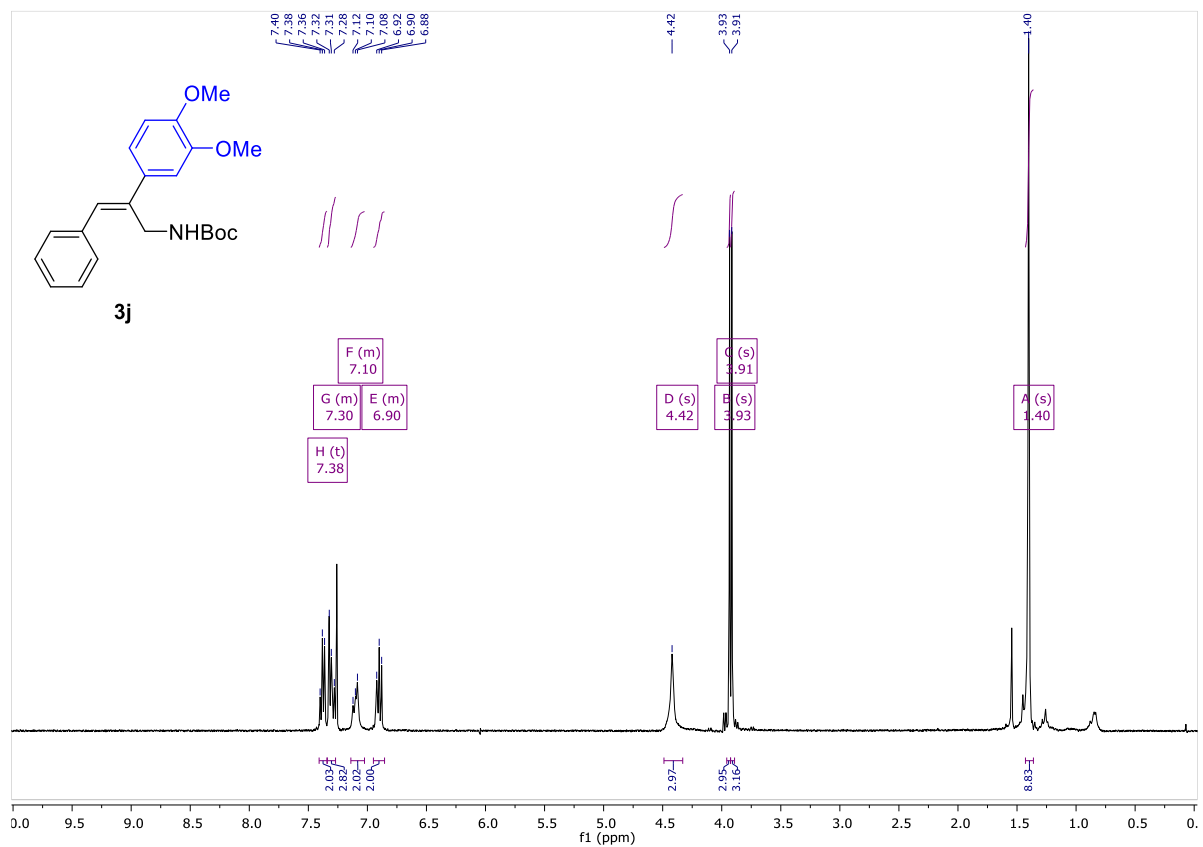

$^{13}\text{C-NMR}$  (101 MHz,  $\text{CDCl}_3$ ):

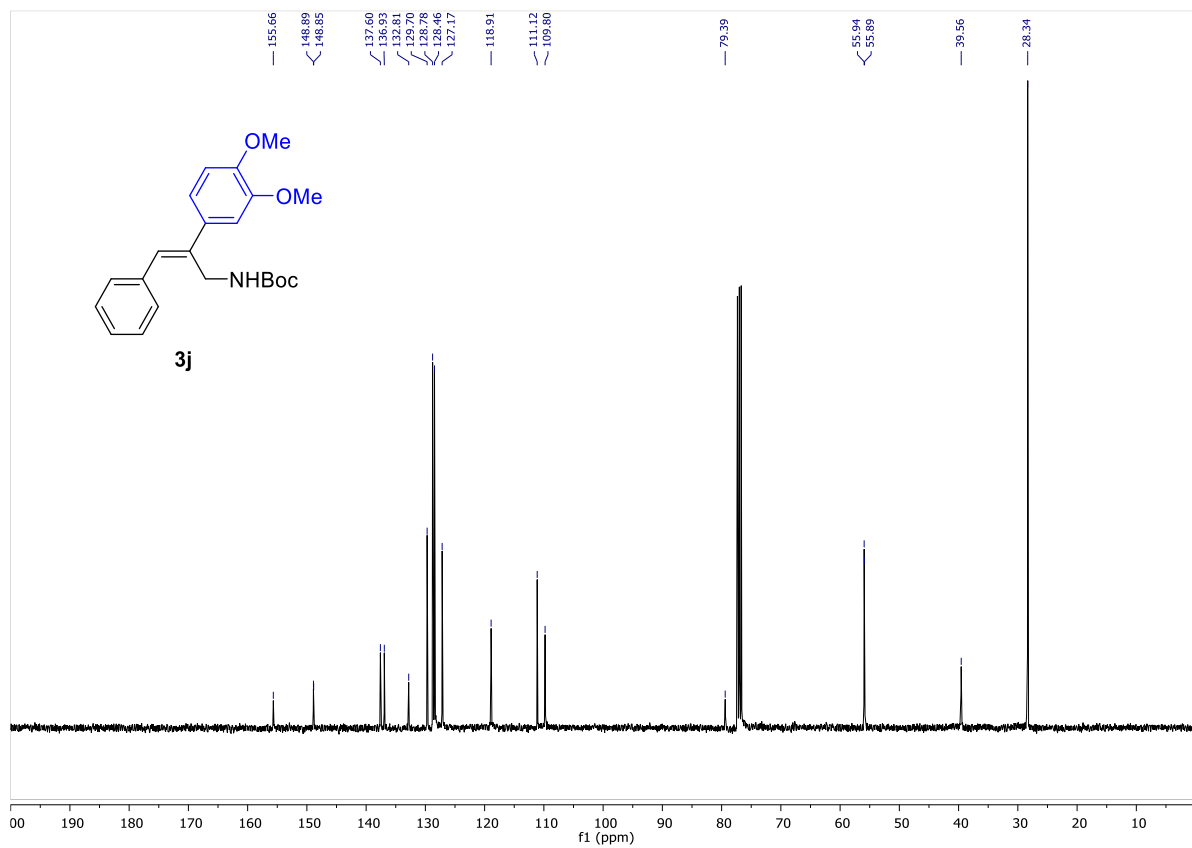

$^1\text{H-NMR}$  (400 MHz,  $\text{CDCl}_3$ ):

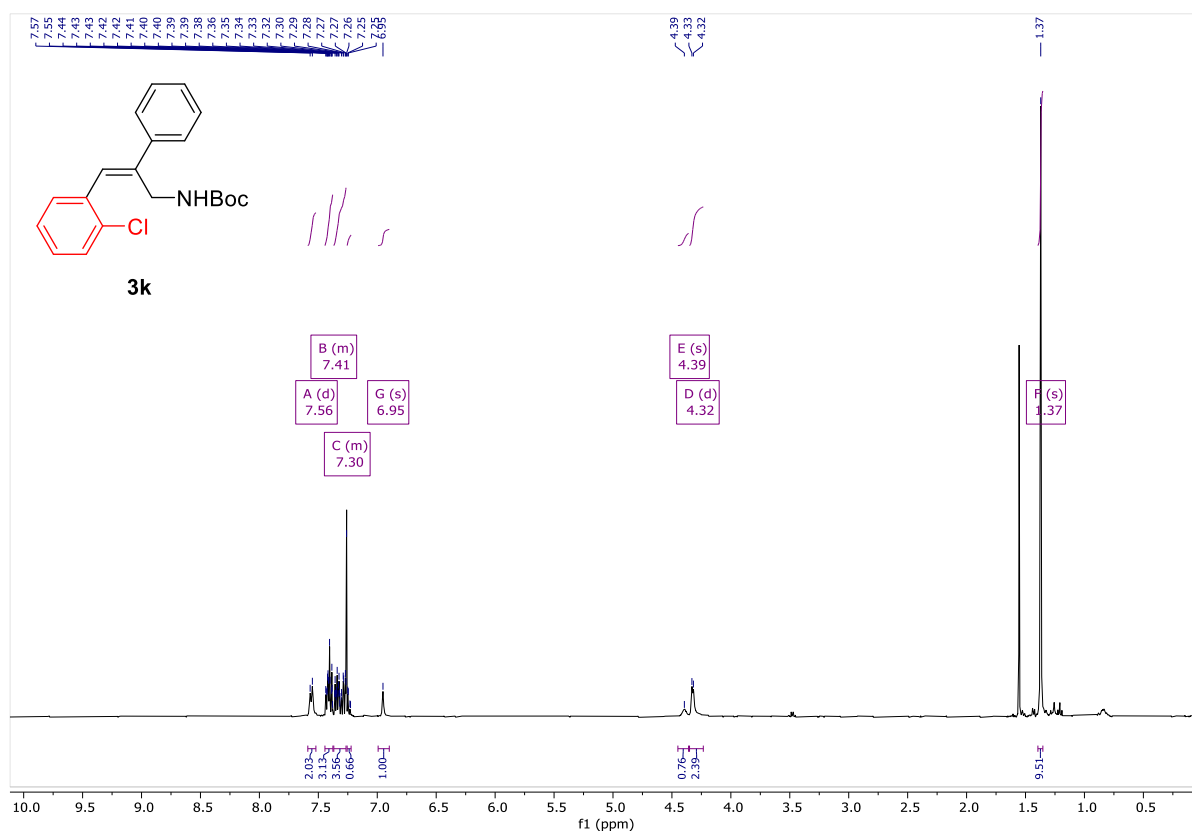

$^1\text{H-NMR}$  (400 MHz,  $\text{CDCl}_3$ ):

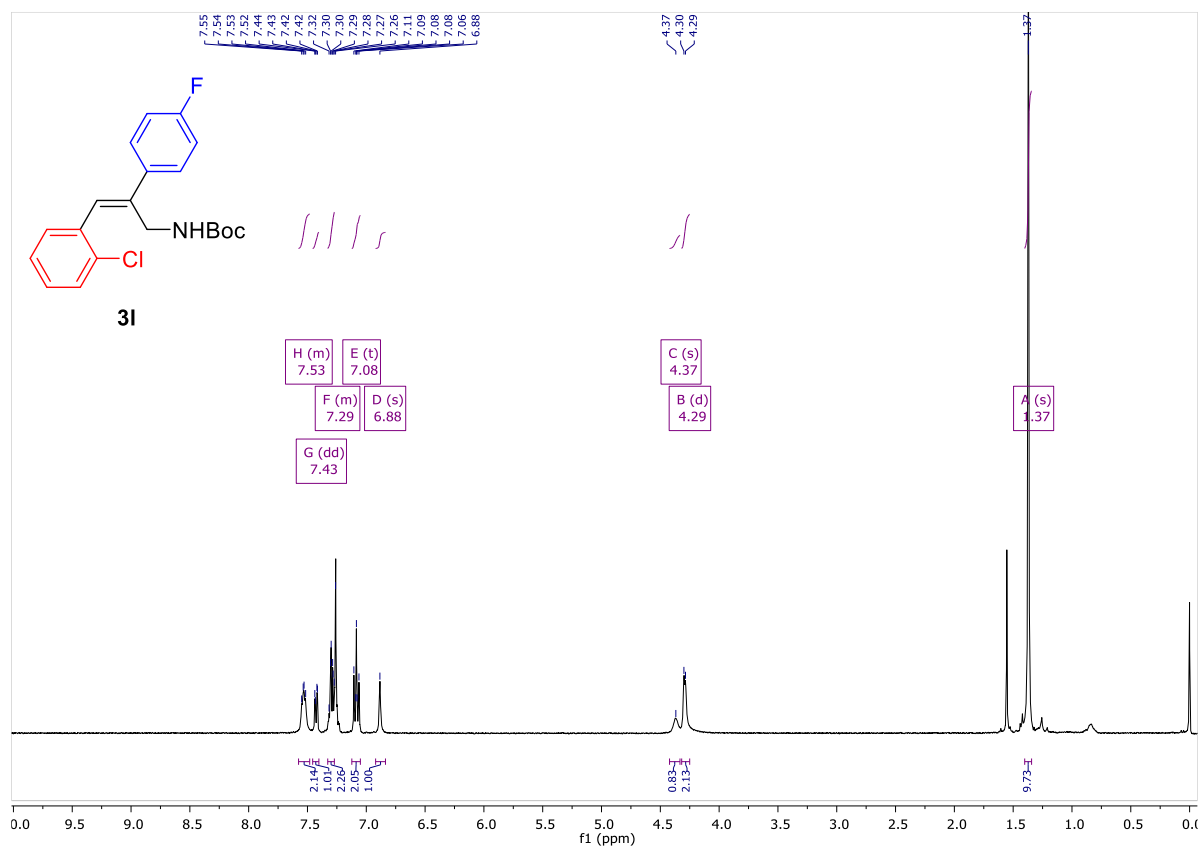

$^{13}\text{C-NMR}$  (101 MHz,  $\text{CDCl}_3$ ):

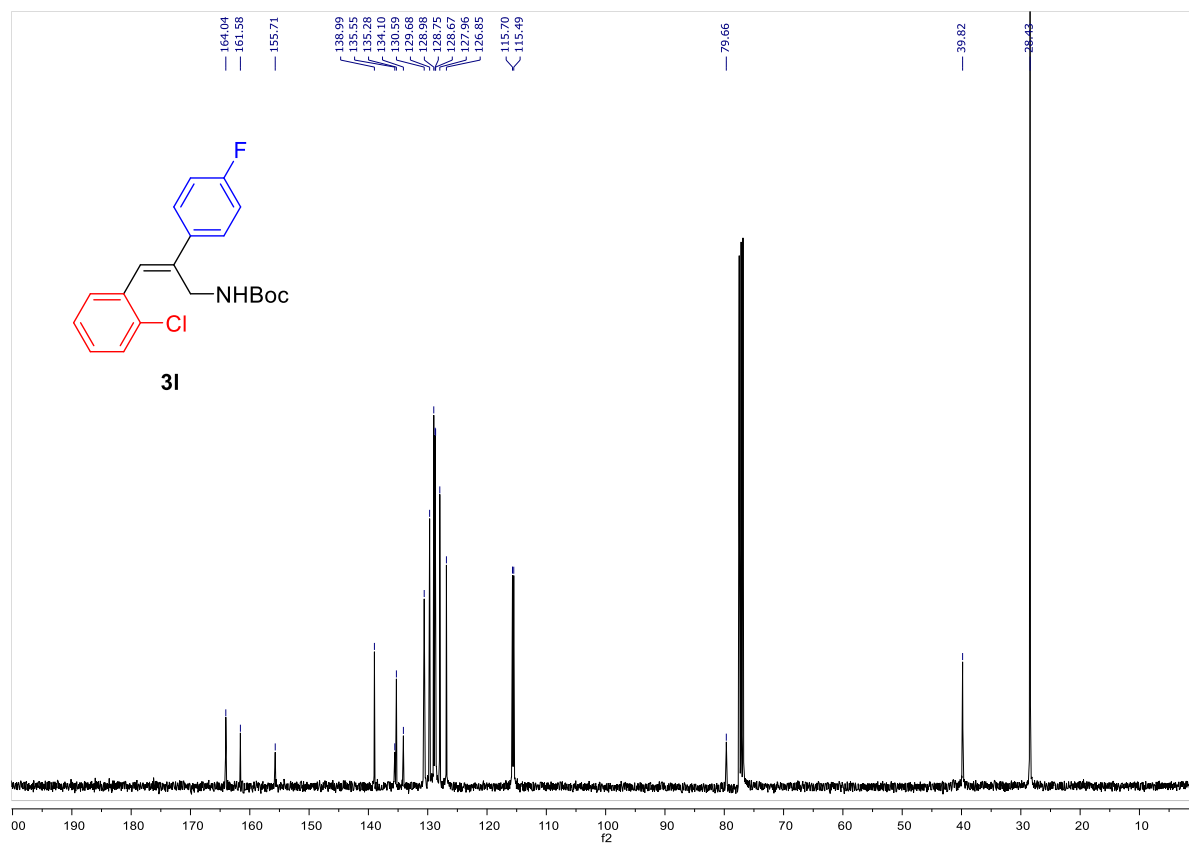

$^1\text{H-NMR}$  (400 MHz,  $\text{CDCl}_3$ ):

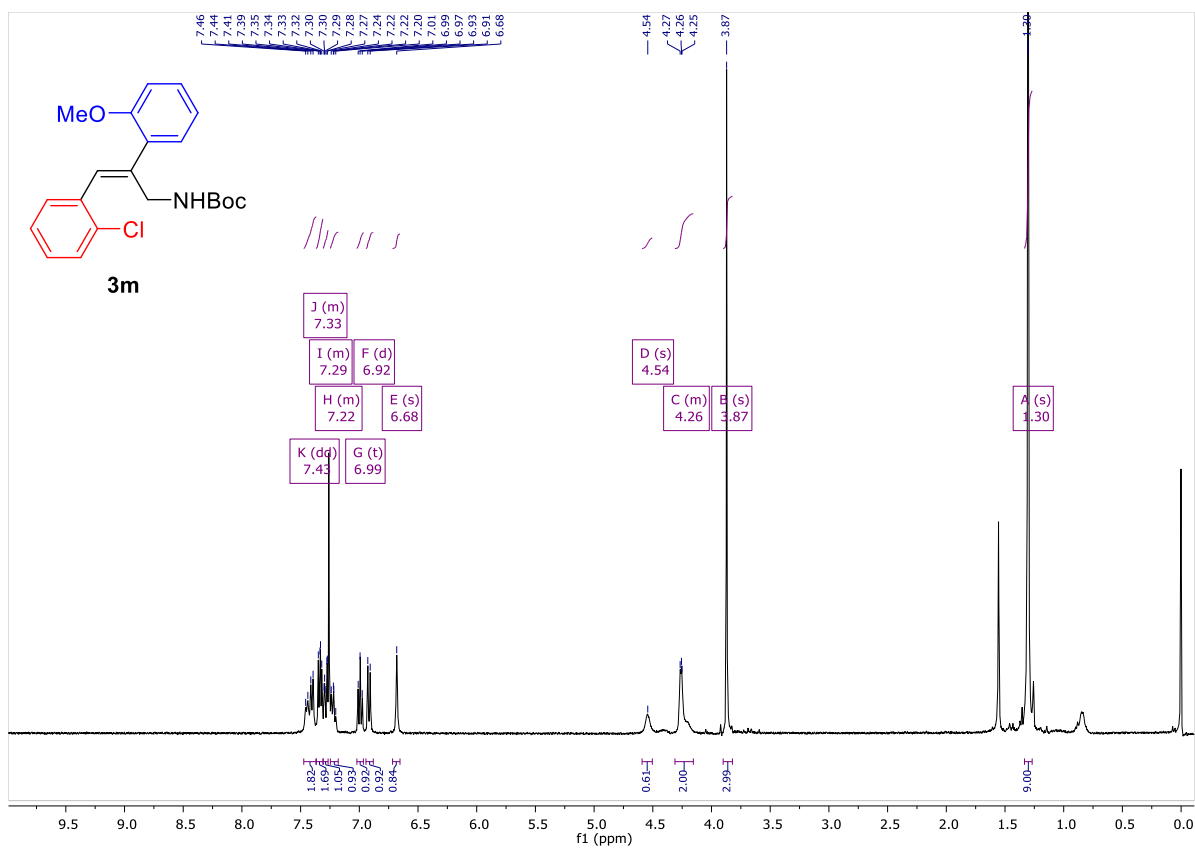

$^{13}\text{C-NMR}$  (101 MHz,  $\text{CDCl}_3$ ):

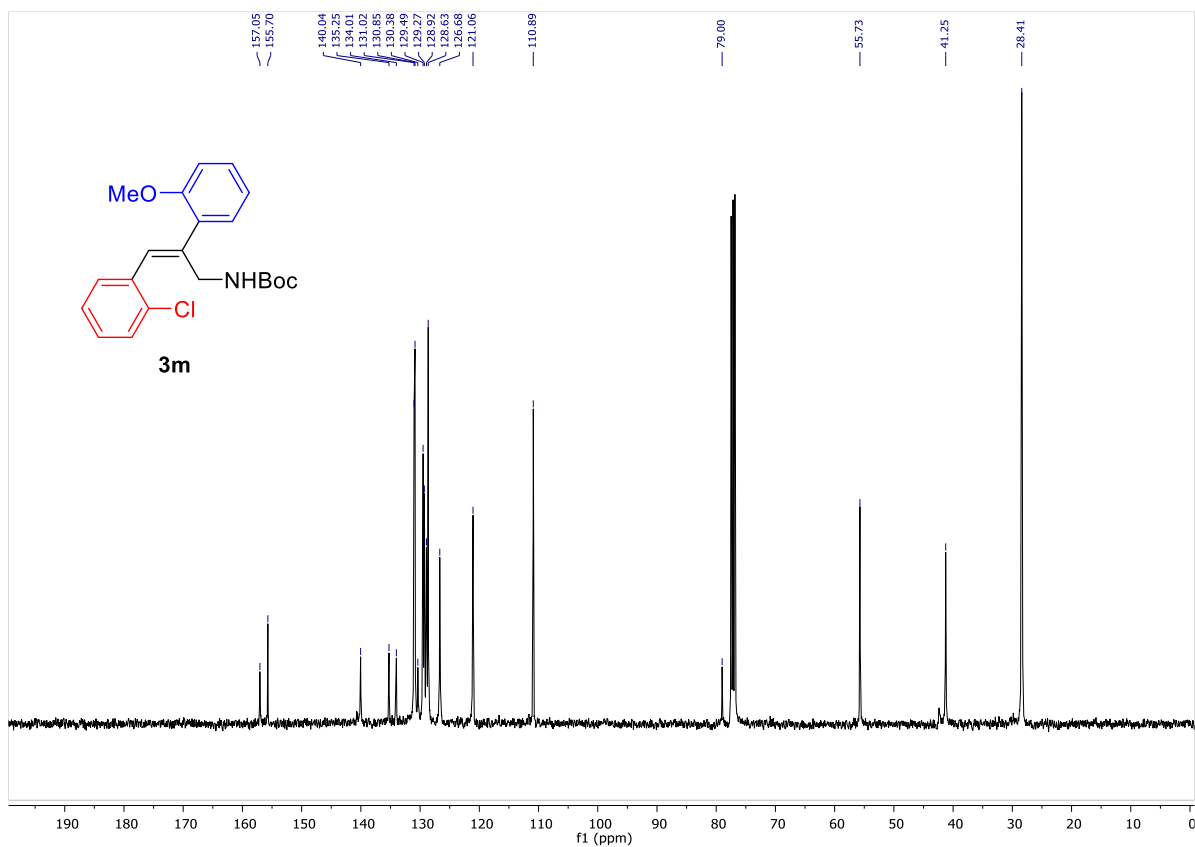

$^1\text{H-NMR}$  (400 MHz,  $\text{CDCl}_3$ ):

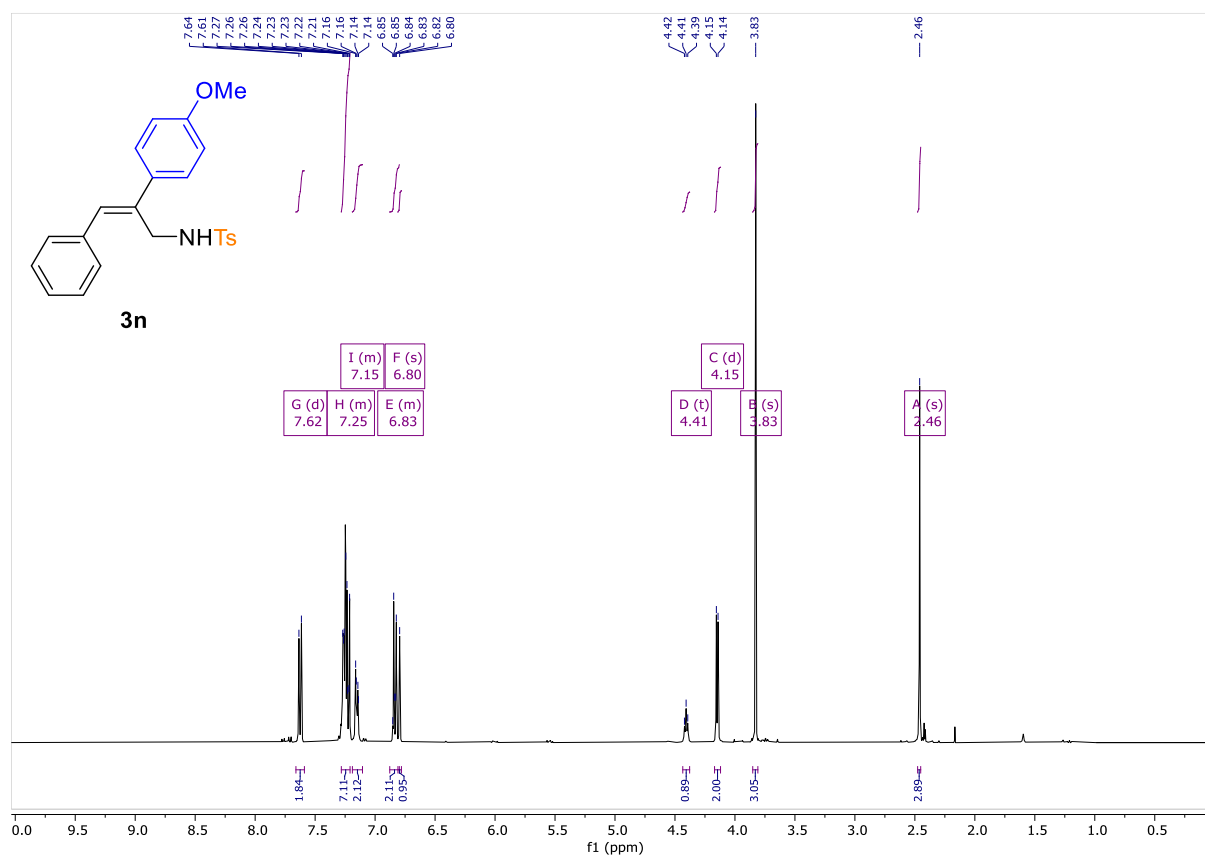

$^{13}\text{C-NMR}$  (101 MHz,  $\text{CDCl}_3$ ):



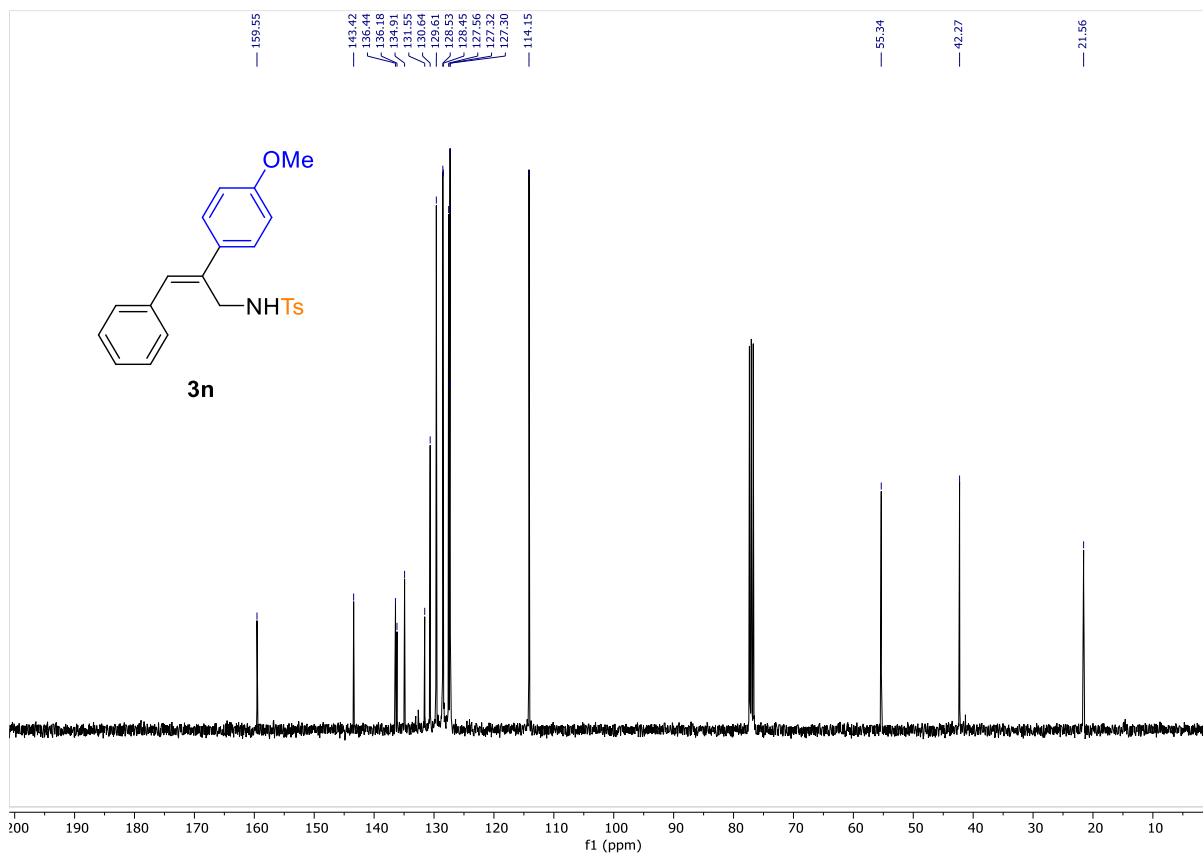

$^1\text{H-NMR}$  (400 MHz,  $\text{CDCl}_3$ ):

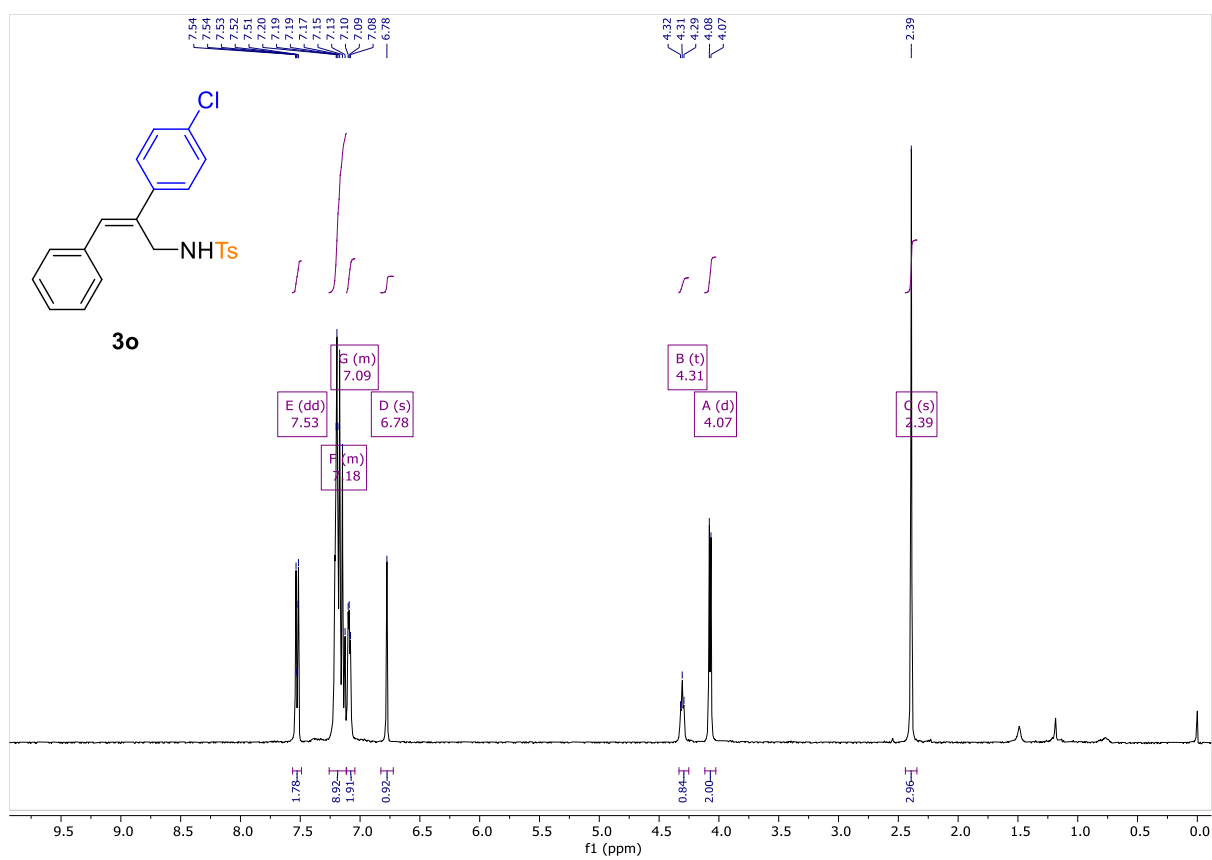

$^{13}\text{C-NMR}$  (101 MHz,  $\text{CDCl}_3$ ):

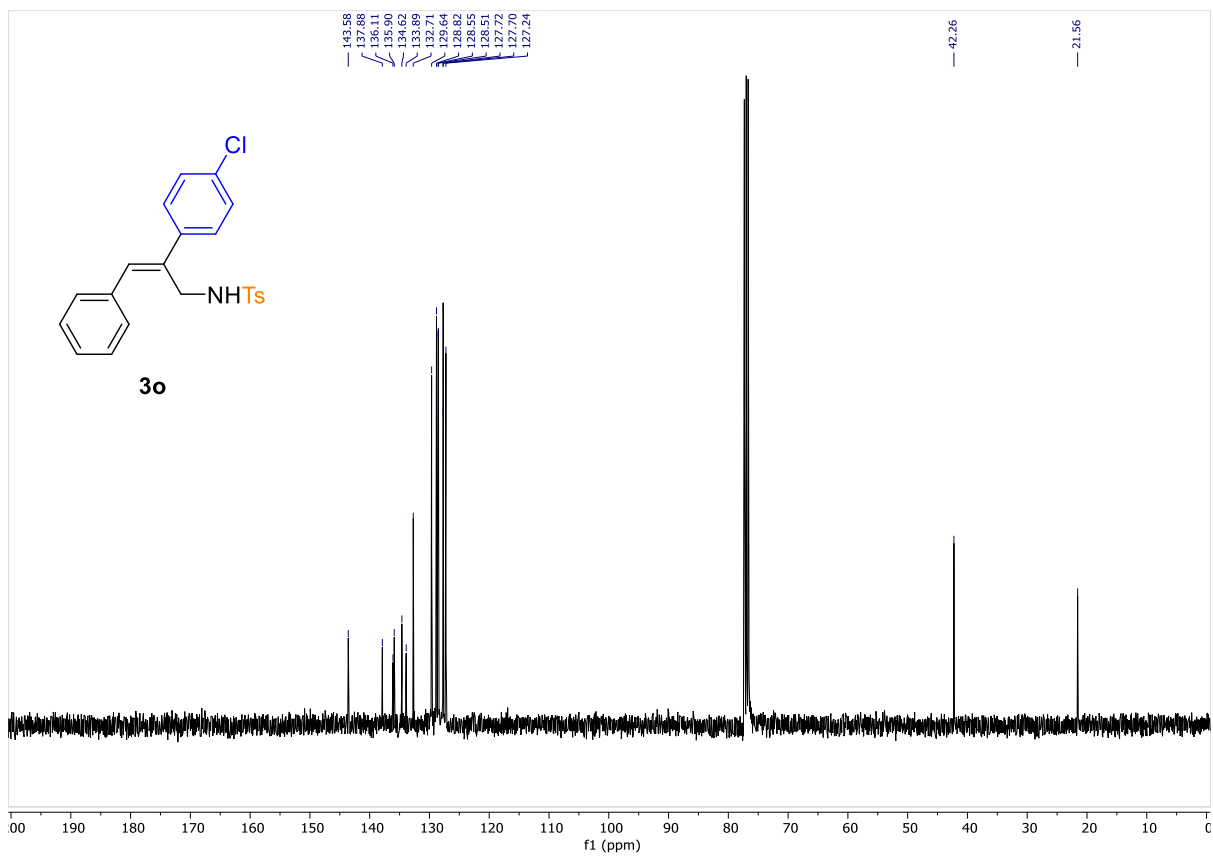

$^1\text{H-NMR}$  (400 MHz,  $\text{CDCl}_3$ ):

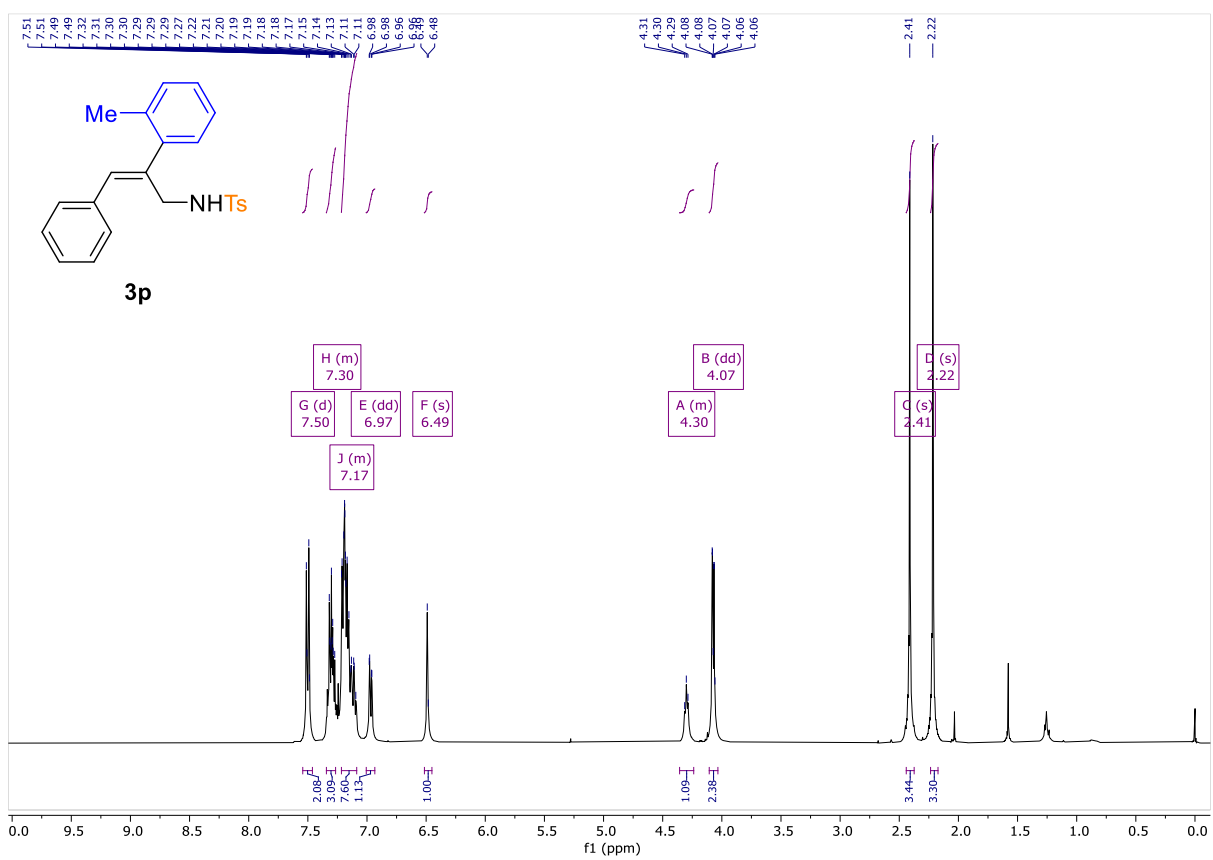

$^{13}\text{C-NMR}$  (101 MHz,  $\text{CDCl}_3$ ):

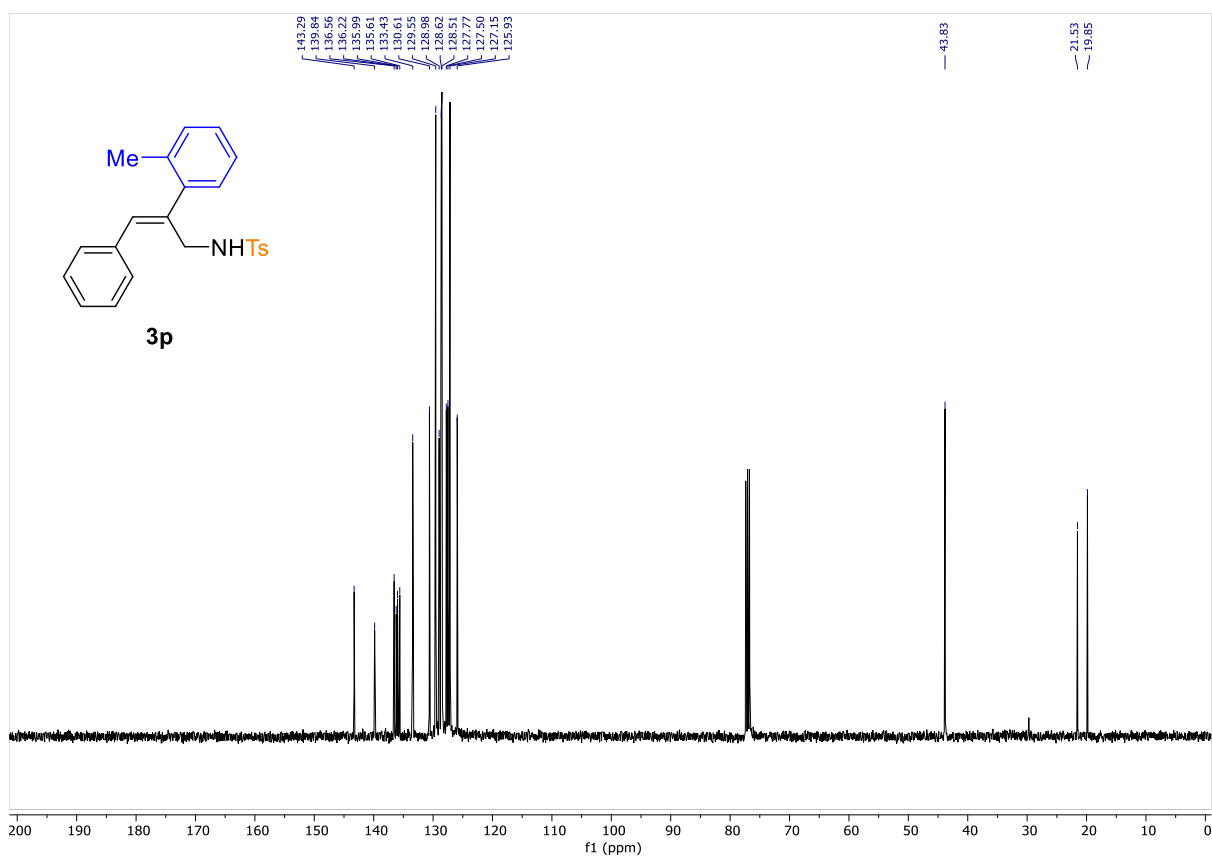

<sup>1</sup>H-NMR (400 MHz, D<sub>2</sub>O):

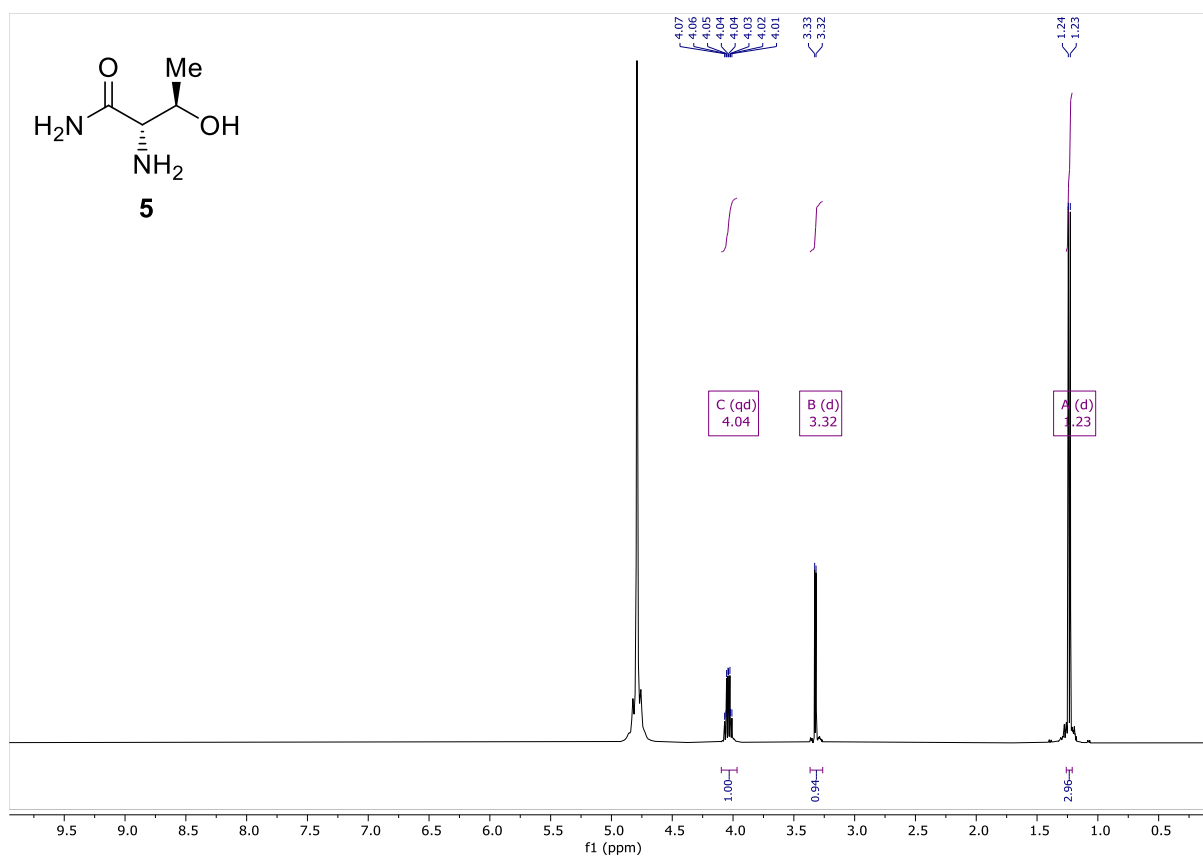

<sup>13</sup>C-NMR (101 MHz, D<sub>2</sub>O):

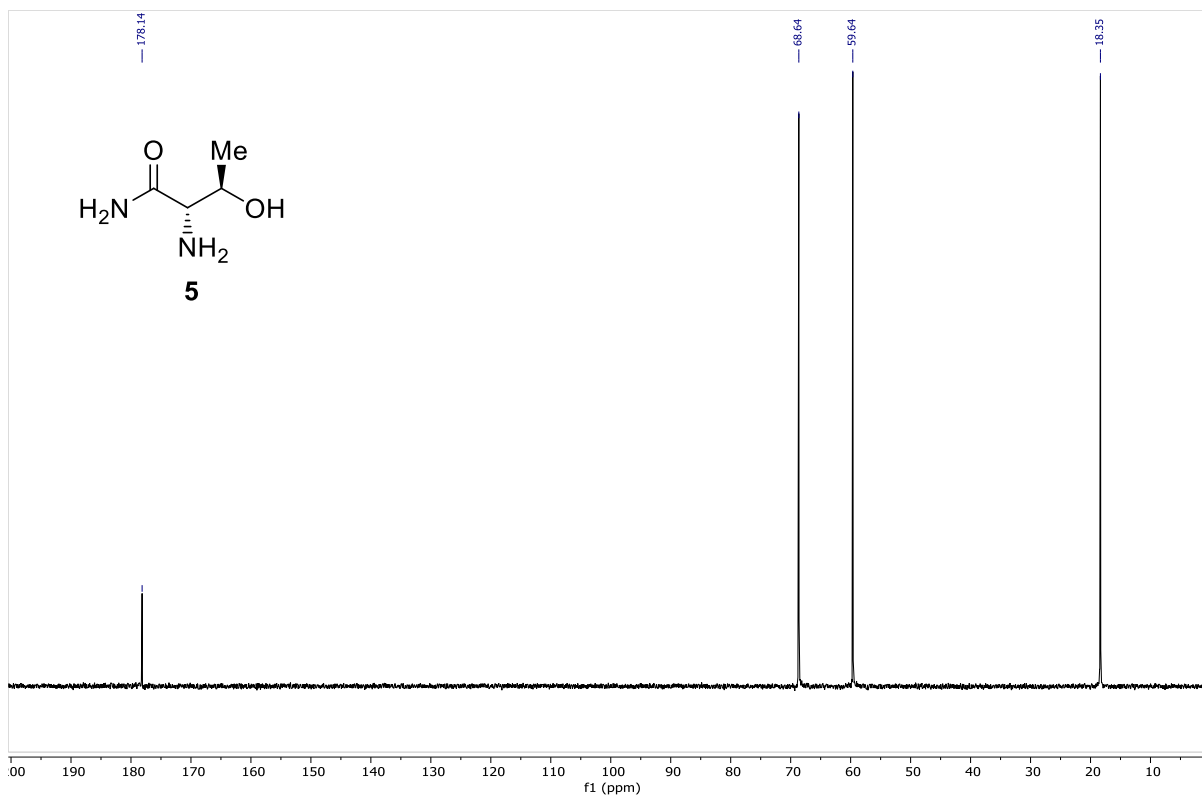

$^1\text{H-NMR}$  (400 MHz,  $\text{D}_2\text{O}$ ):

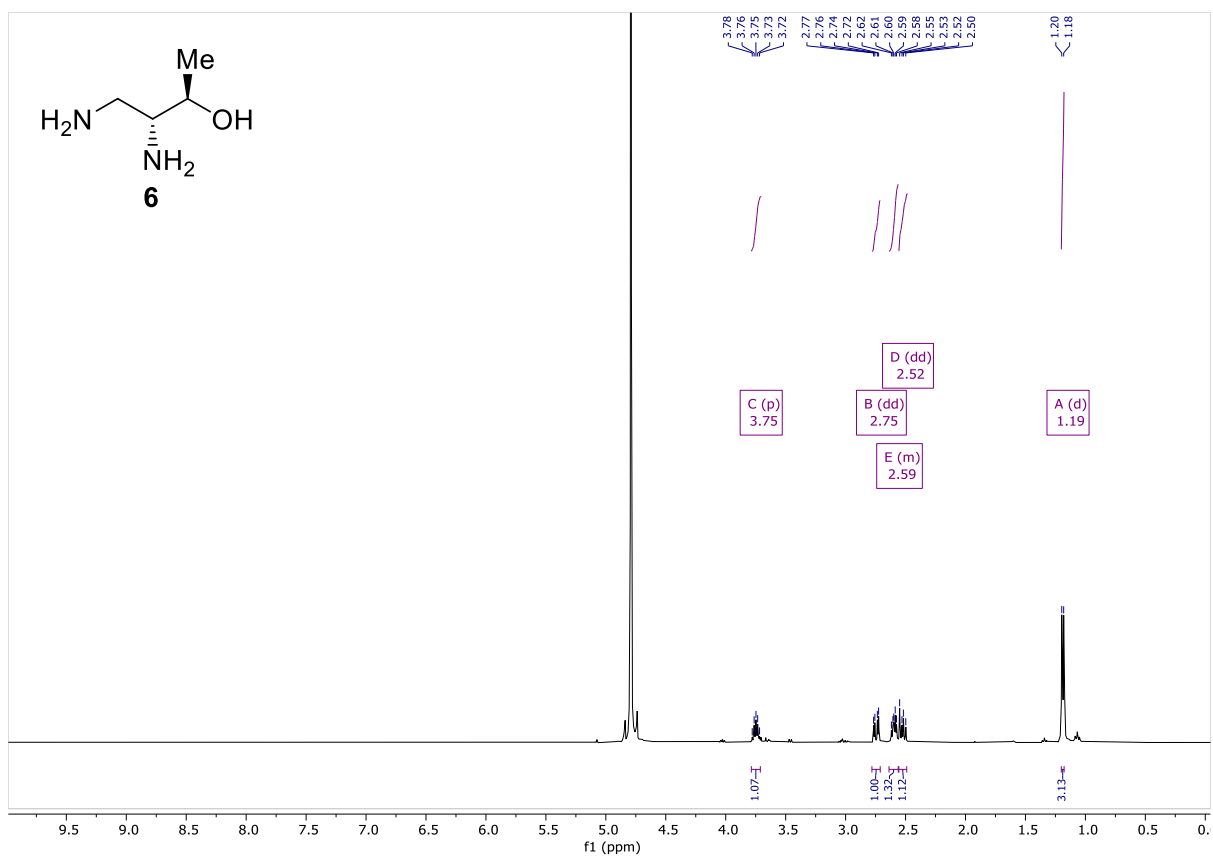

$^{13}\text{C-NMR}$  (101 MHz,  $\text{D}_2\text{O}$ ):

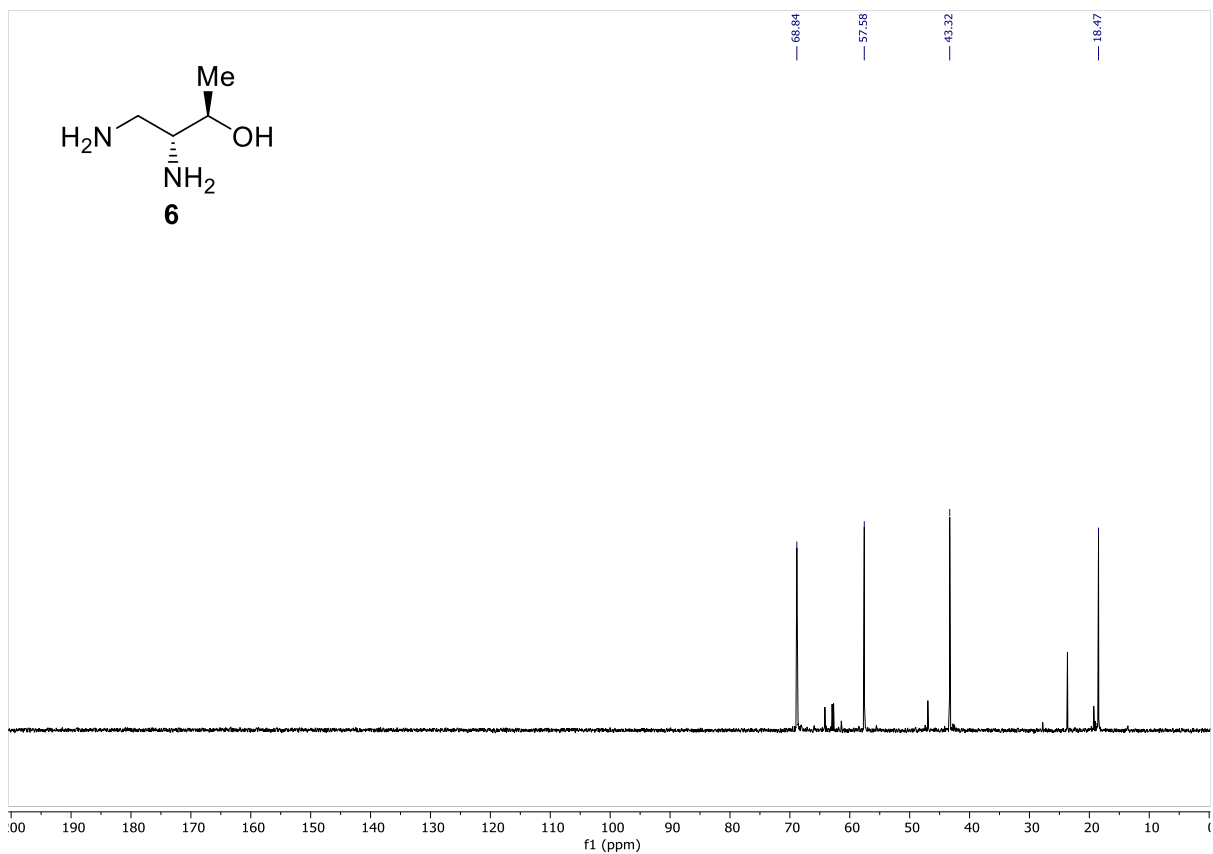

$^1\text{H-NMR}$  (400 MHz,  $\text{CDCl}_3$ ):

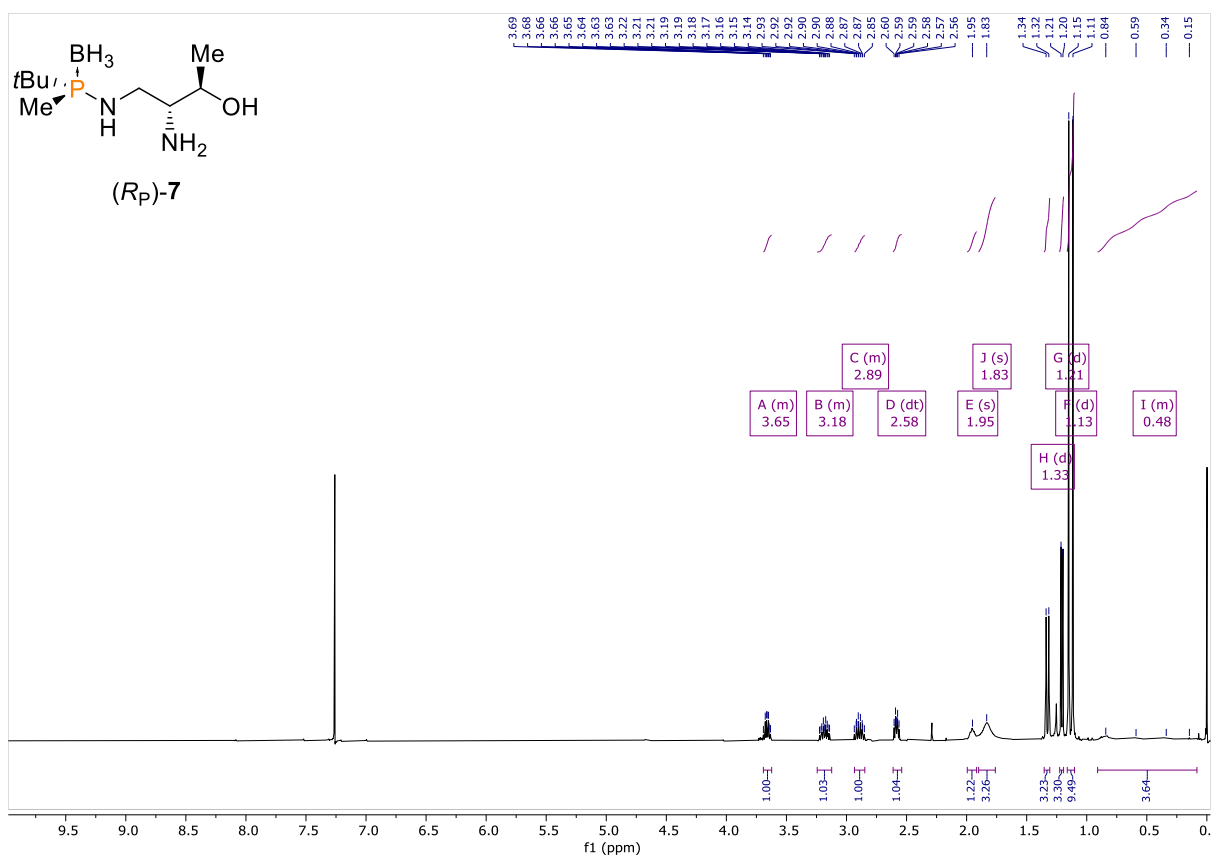

$^{13}\text{C-NMR}$  (101 MHz,  $\text{CDCl}_3$ ):

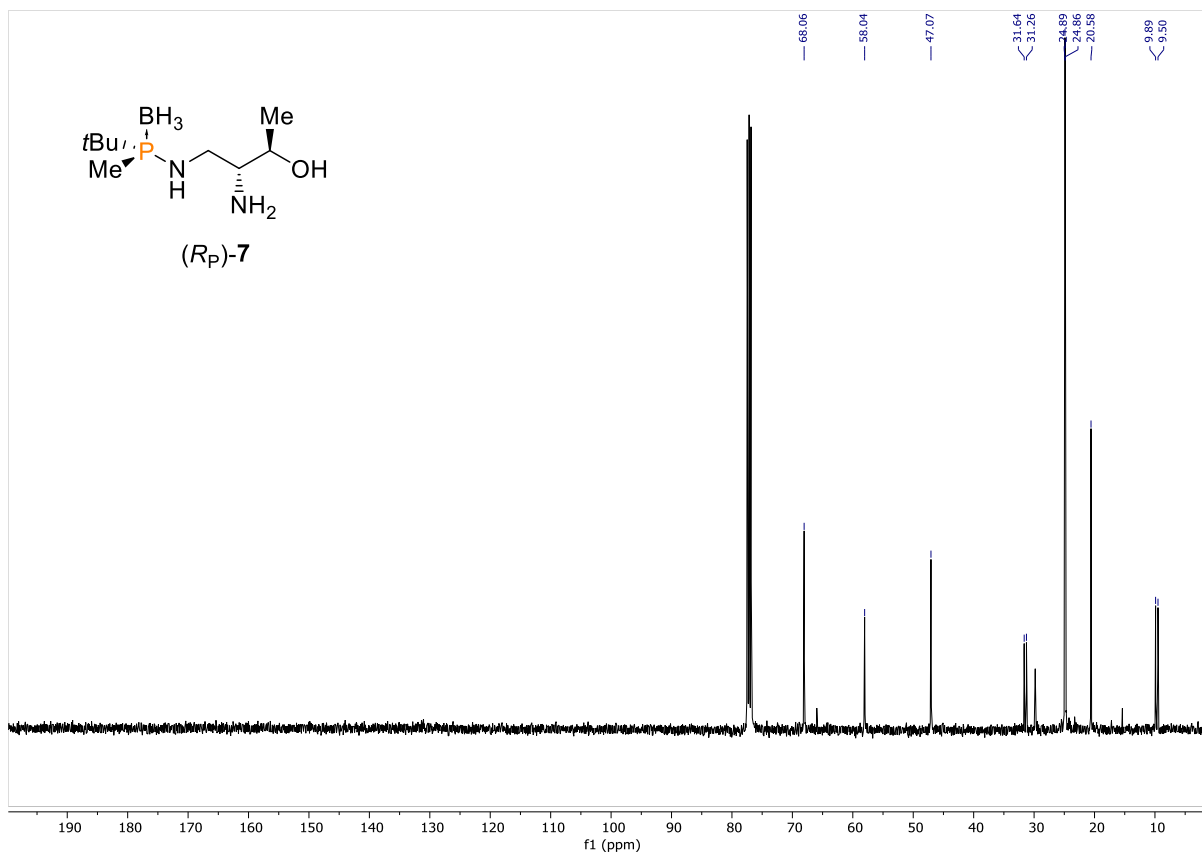

$^{31}\text{P}$ -NMR (162 MHz,  $\text{CDCl}_3$ ):

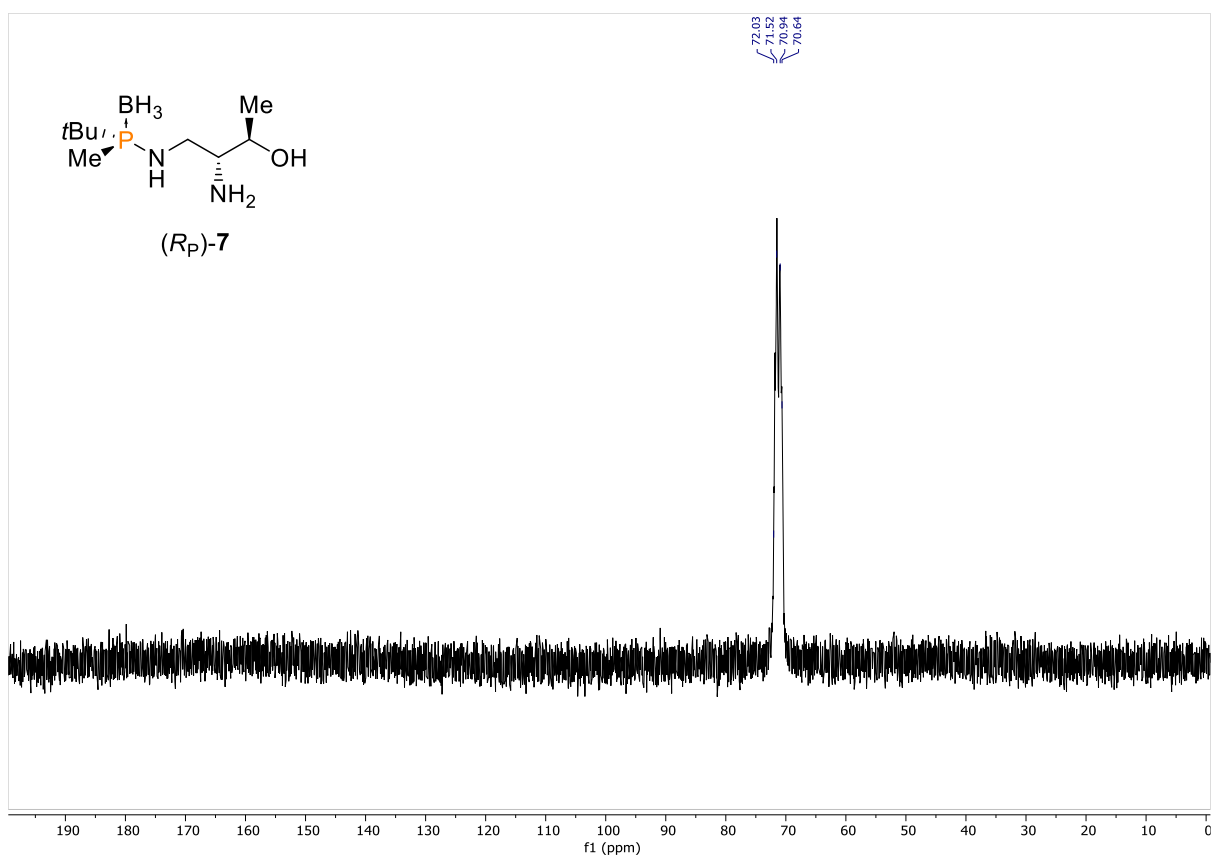

$^1\text{H}$ -NMR (400 MHz,  $\text{CDCl}_3$ ):

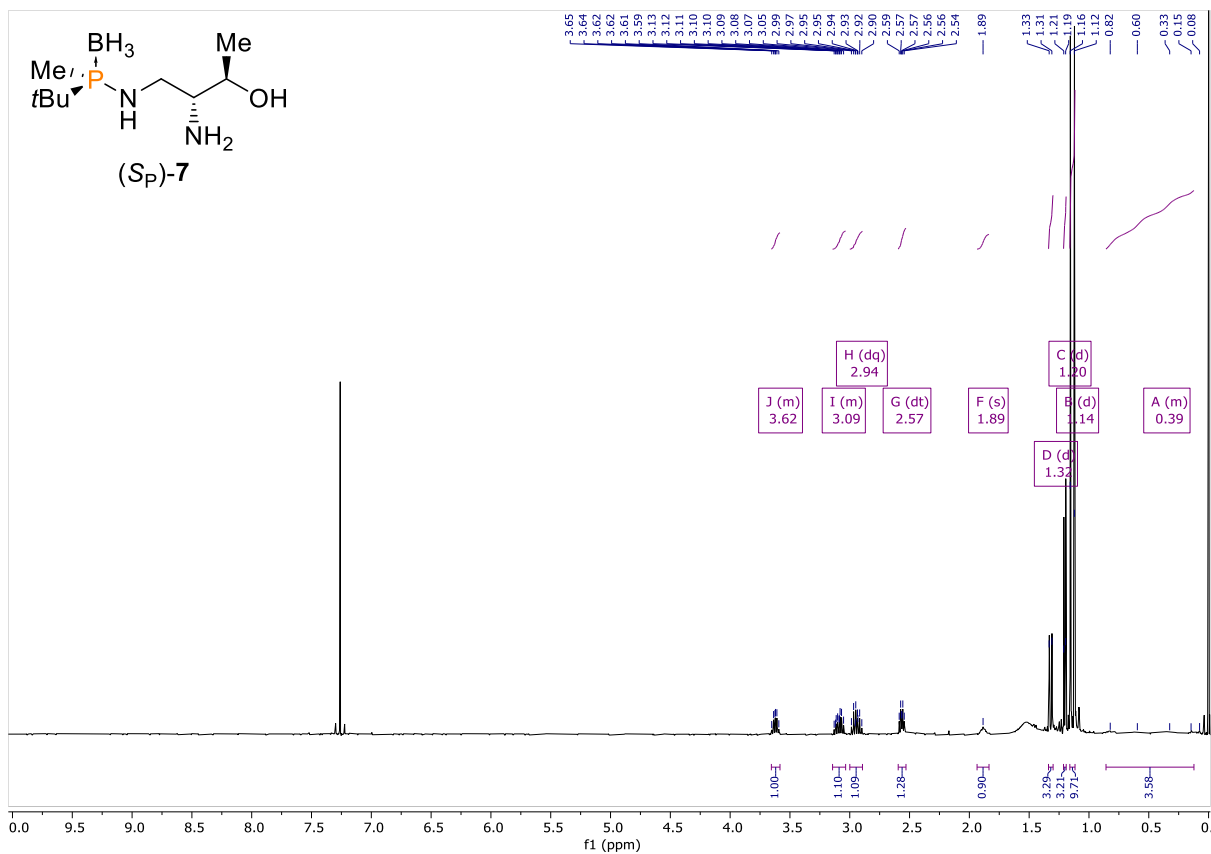

<sup>13</sup>C-NMR (101 MHz, CDCl<sub>3</sub>):

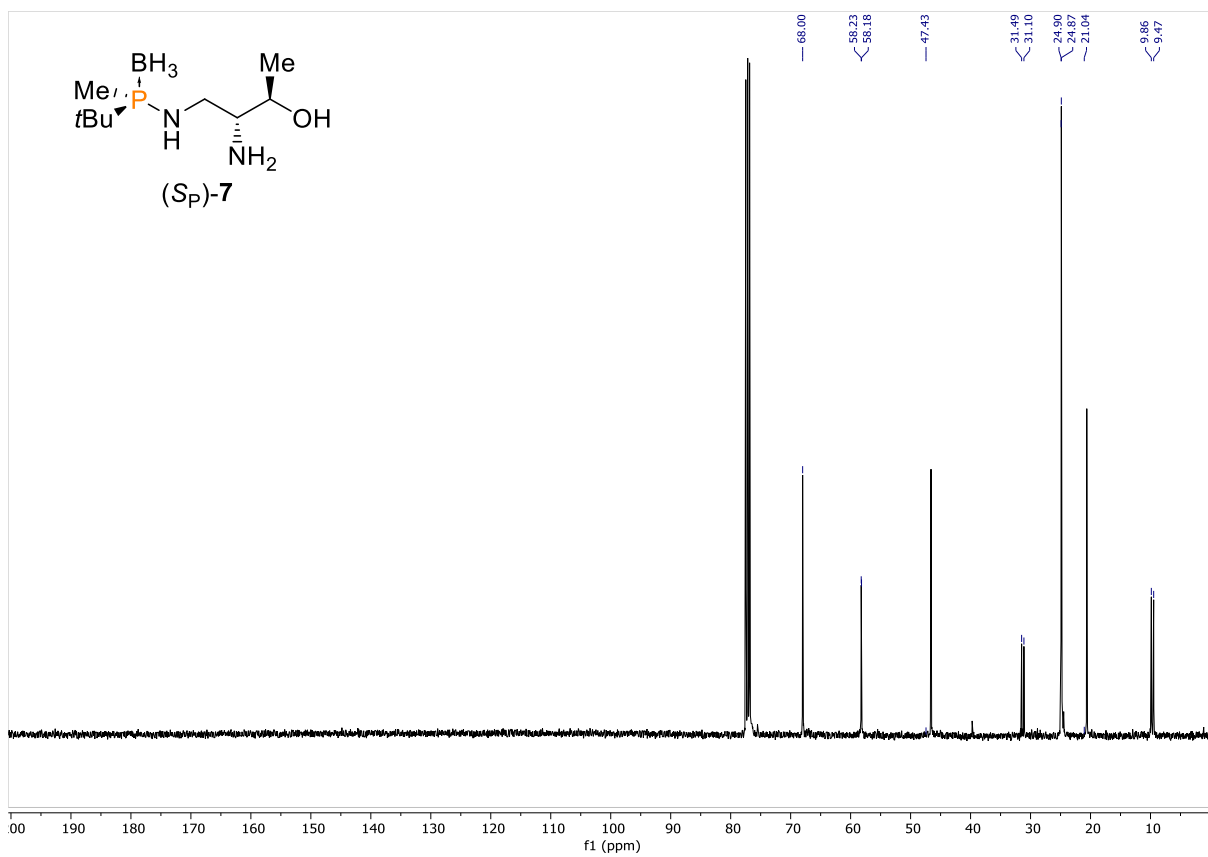

<sup>31</sup>P-NMR (162 MHz, CDCl<sub>3</sub>):

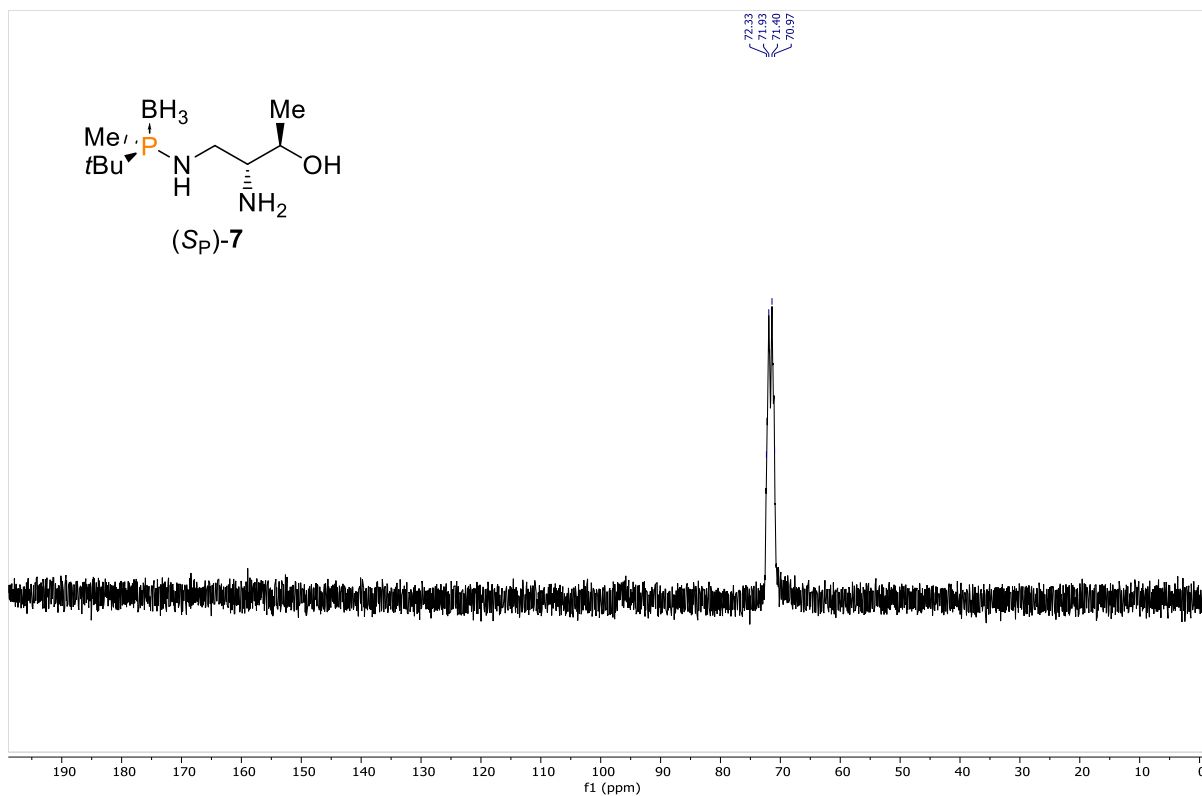

<sup>1</sup>H-NMR (400 MHz, CDCl<sub>3</sub>):

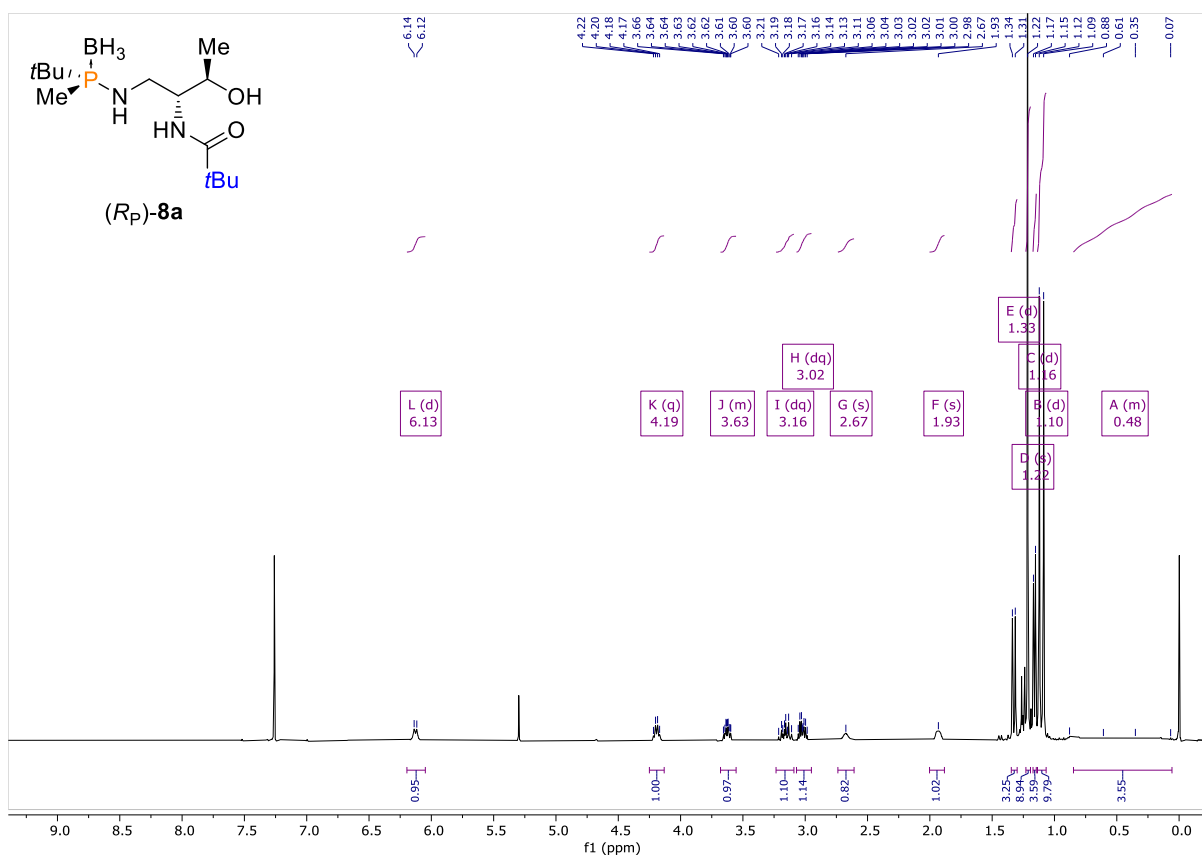

<sup>1</sup>H-NMR (400 MHz, CDCl<sub>3</sub>):



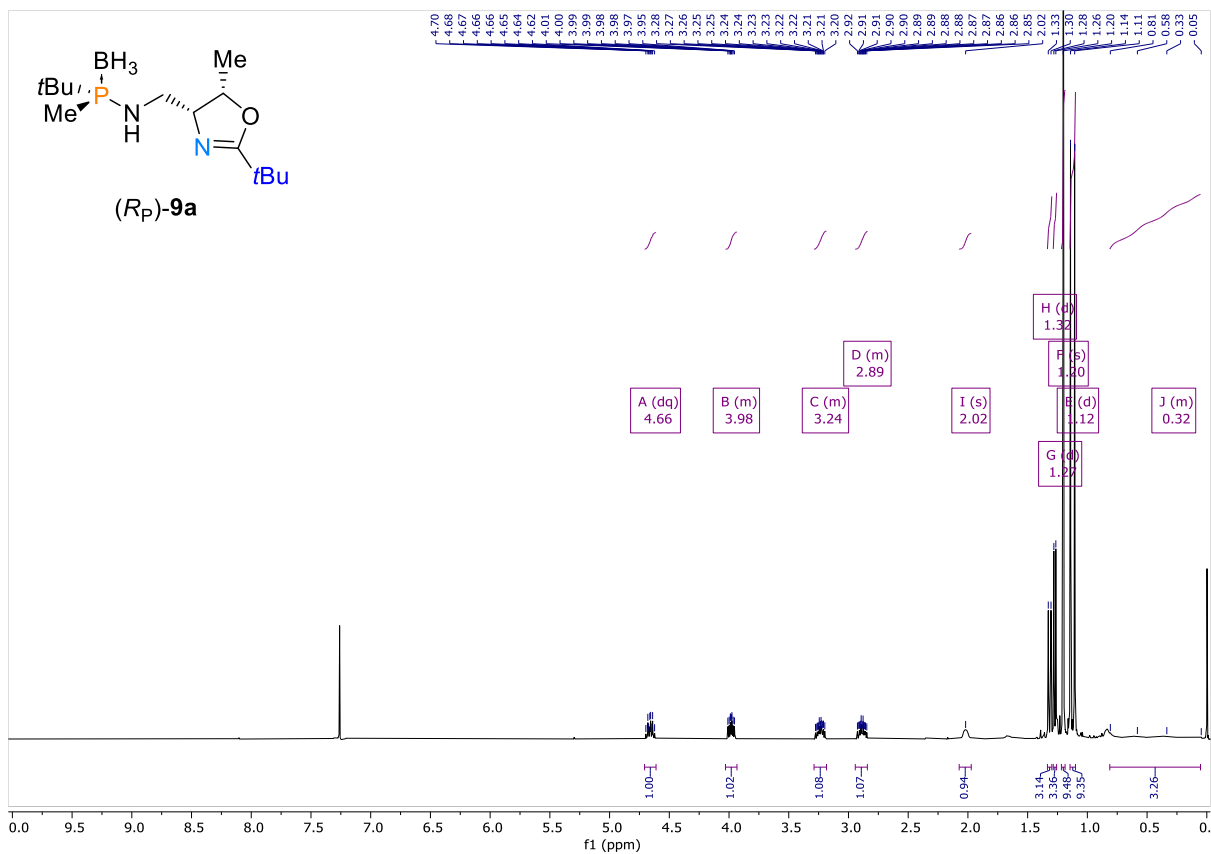

<sup>13</sup>C-NMR (101 MHz, CDCl<sub>3</sub>):

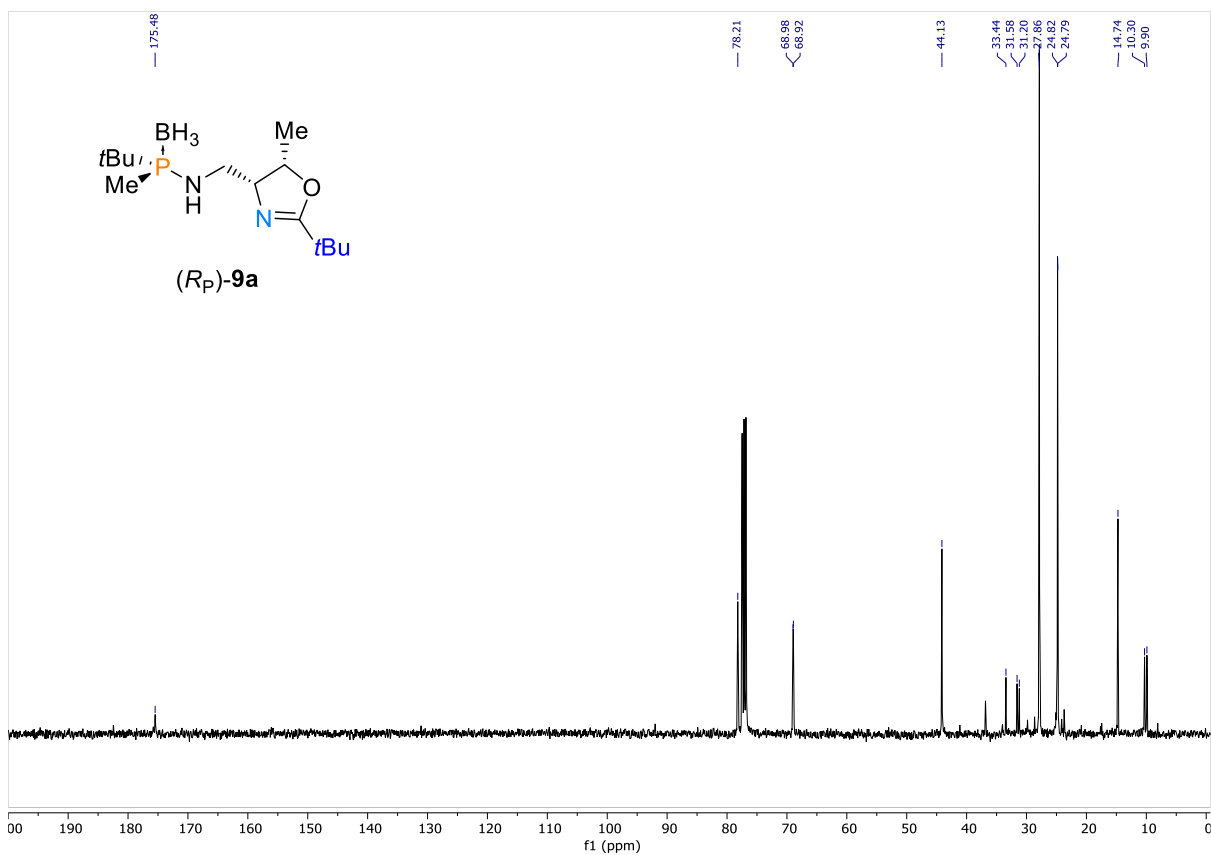

<sup>31</sup>P-NMR (162 MHz, CDCl<sub>3</sub>):

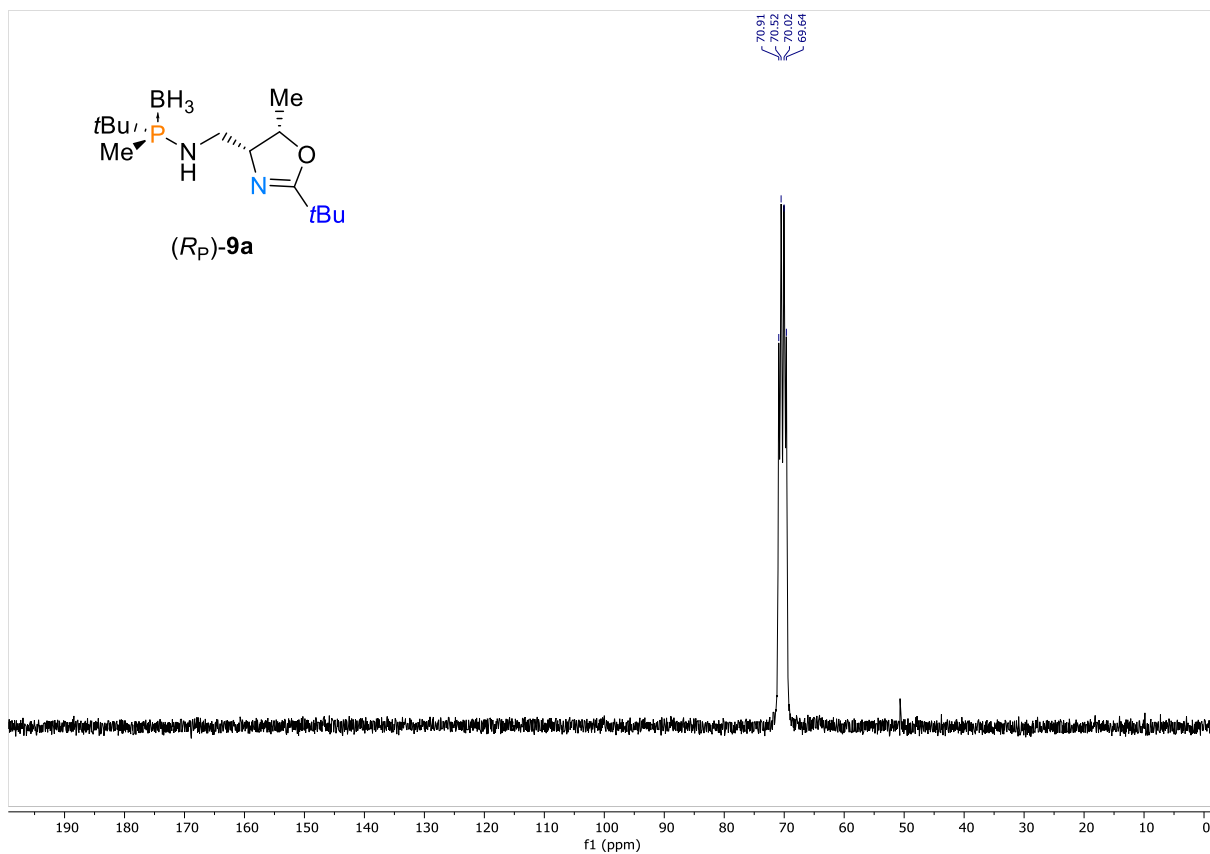

<sup>1</sup>H-NMR (400 MHz, CDCl<sub>3</sub>):

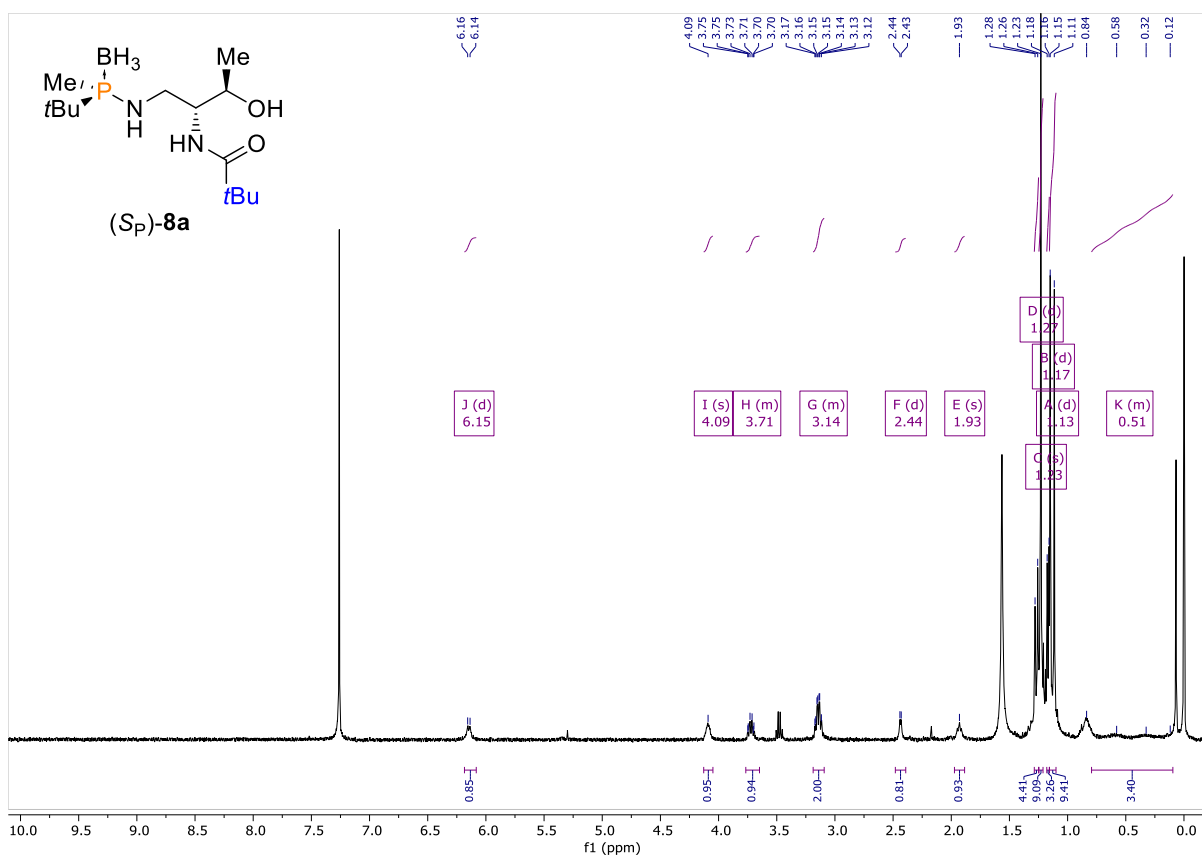

<sup>1</sup>H-NMR (400 MHz, CDCl<sub>3</sub>):

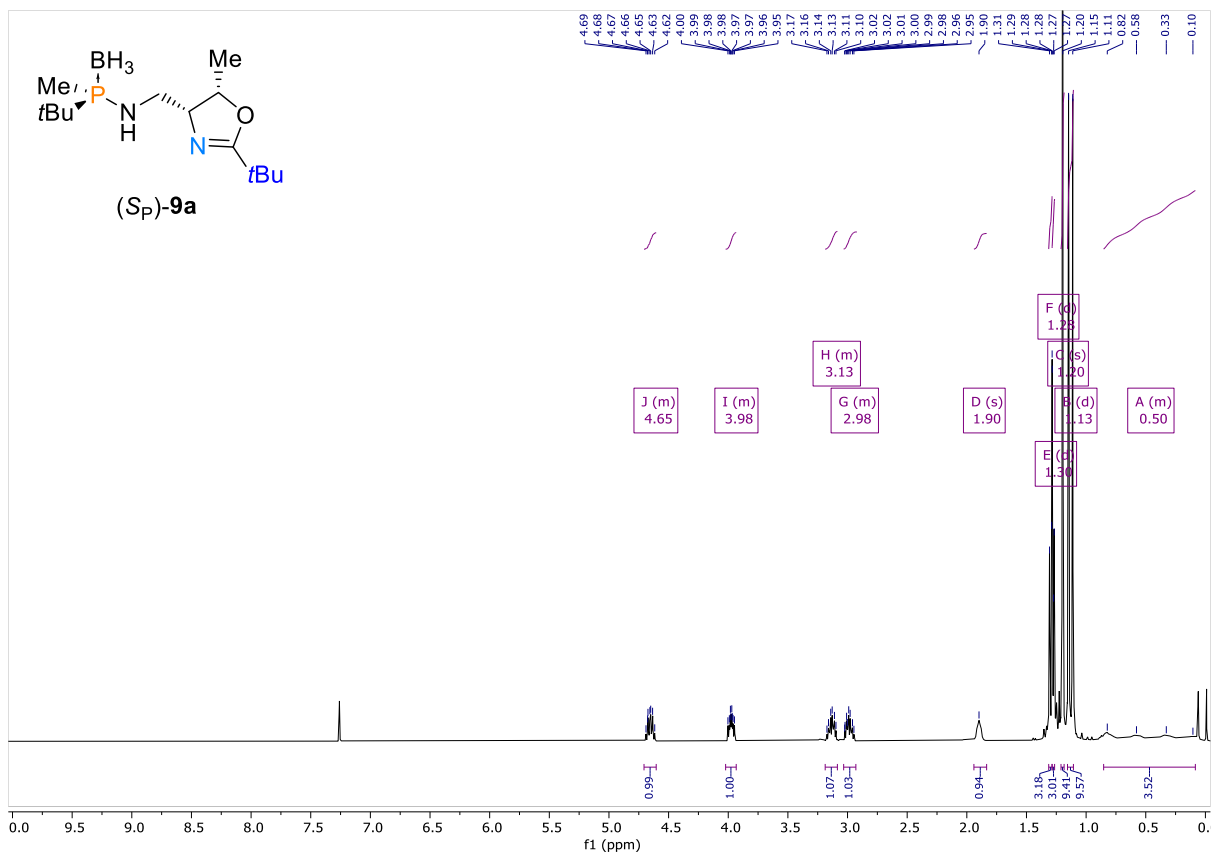

**<sup>13</sup>C-NMR (101 MHz, CDCl<sub>3</sub>):**

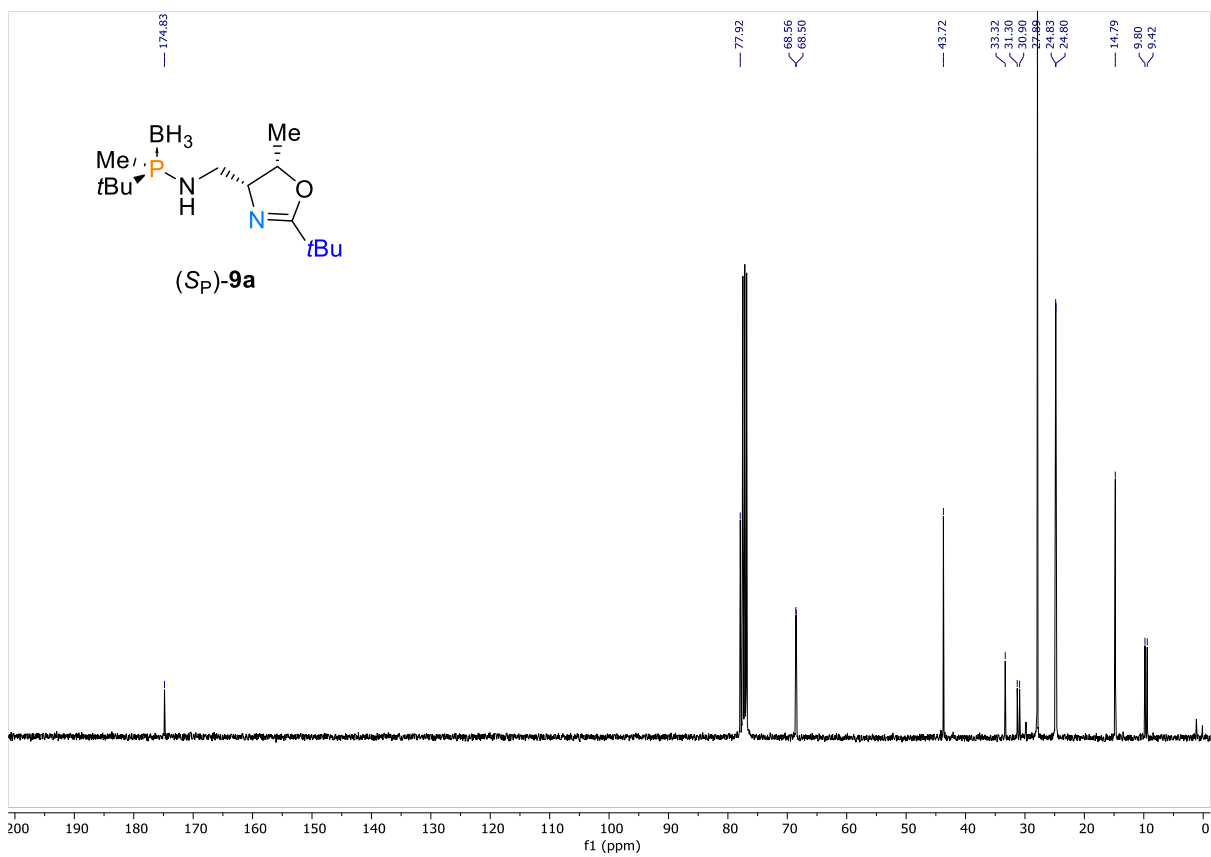

**<sup>31</sup>P-NMR (162 MHz, CDCl<sub>3</sub>):**

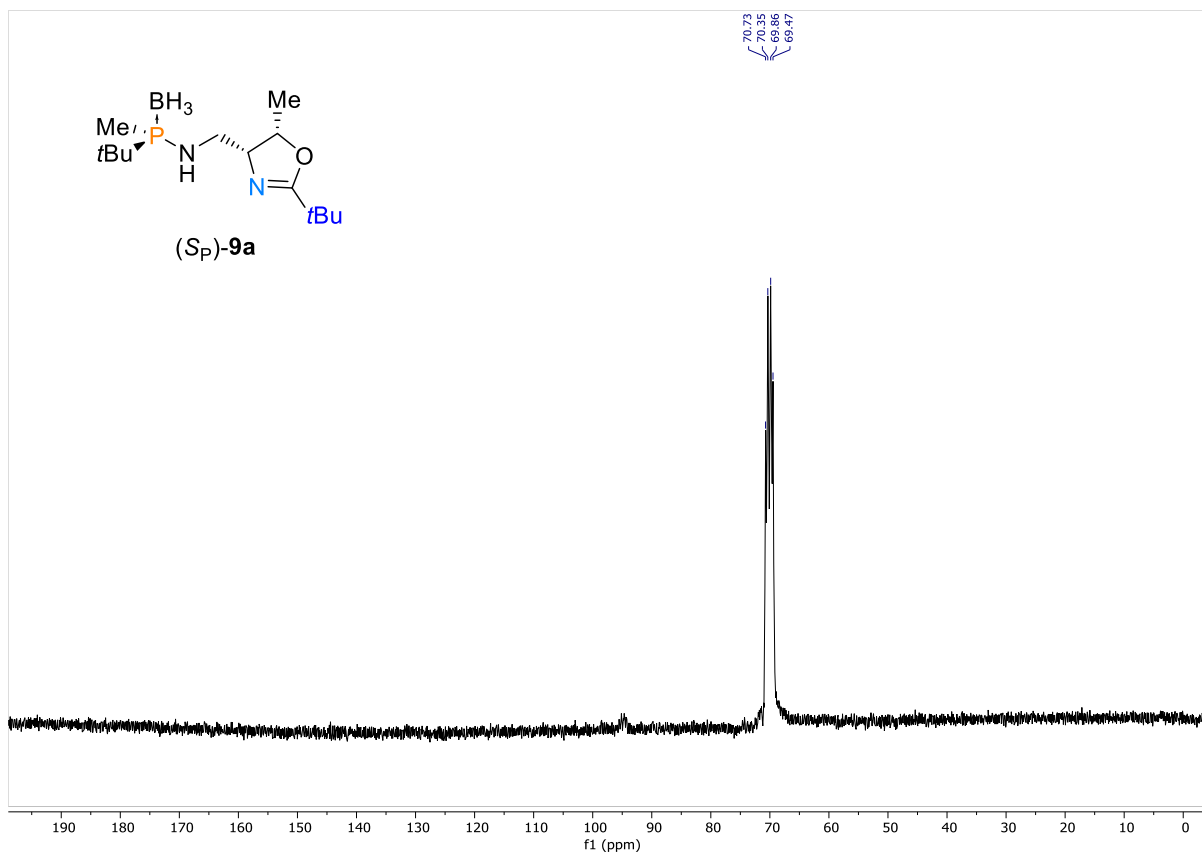

<sup>1</sup>H-NMR (400 MHz, CDCl<sub>3</sub>):

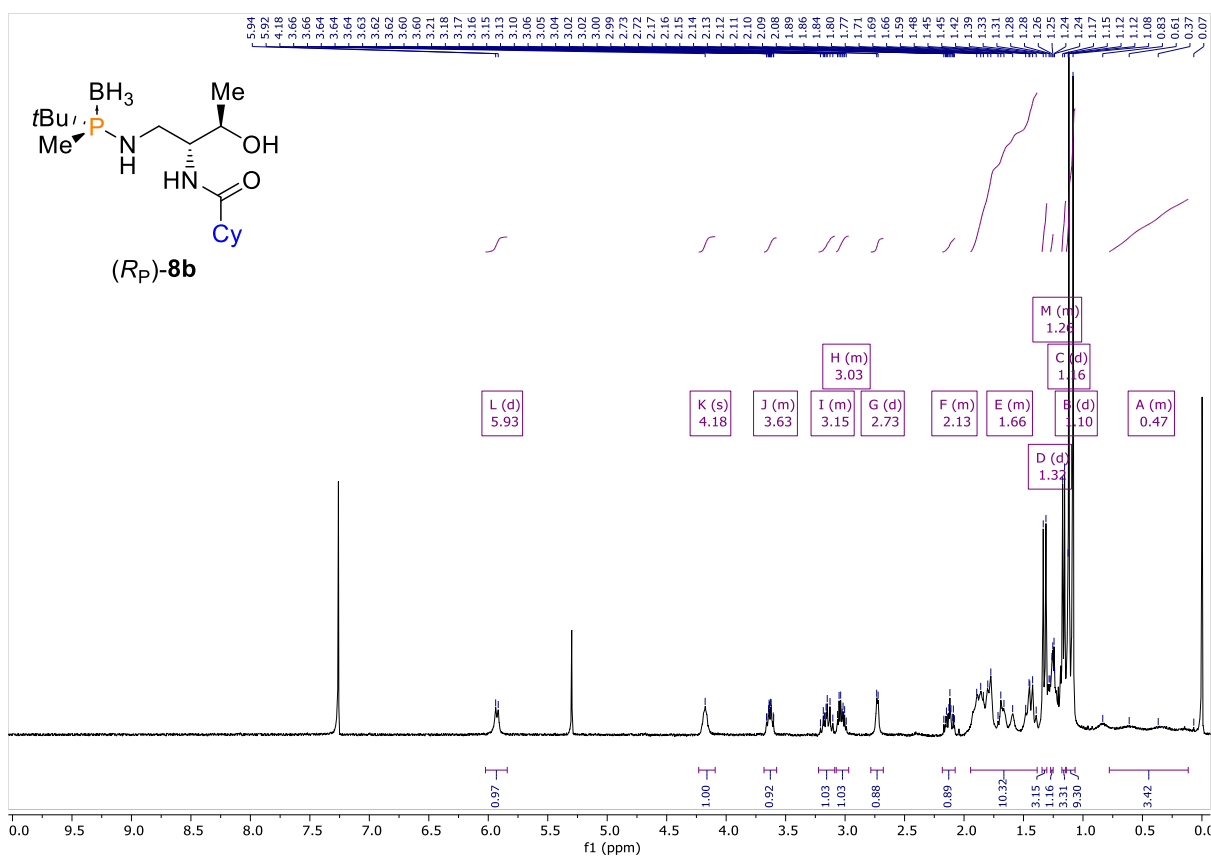

<sup>1</sup>H-NMR (400 MHz, CDCl<sub>3</sub>):

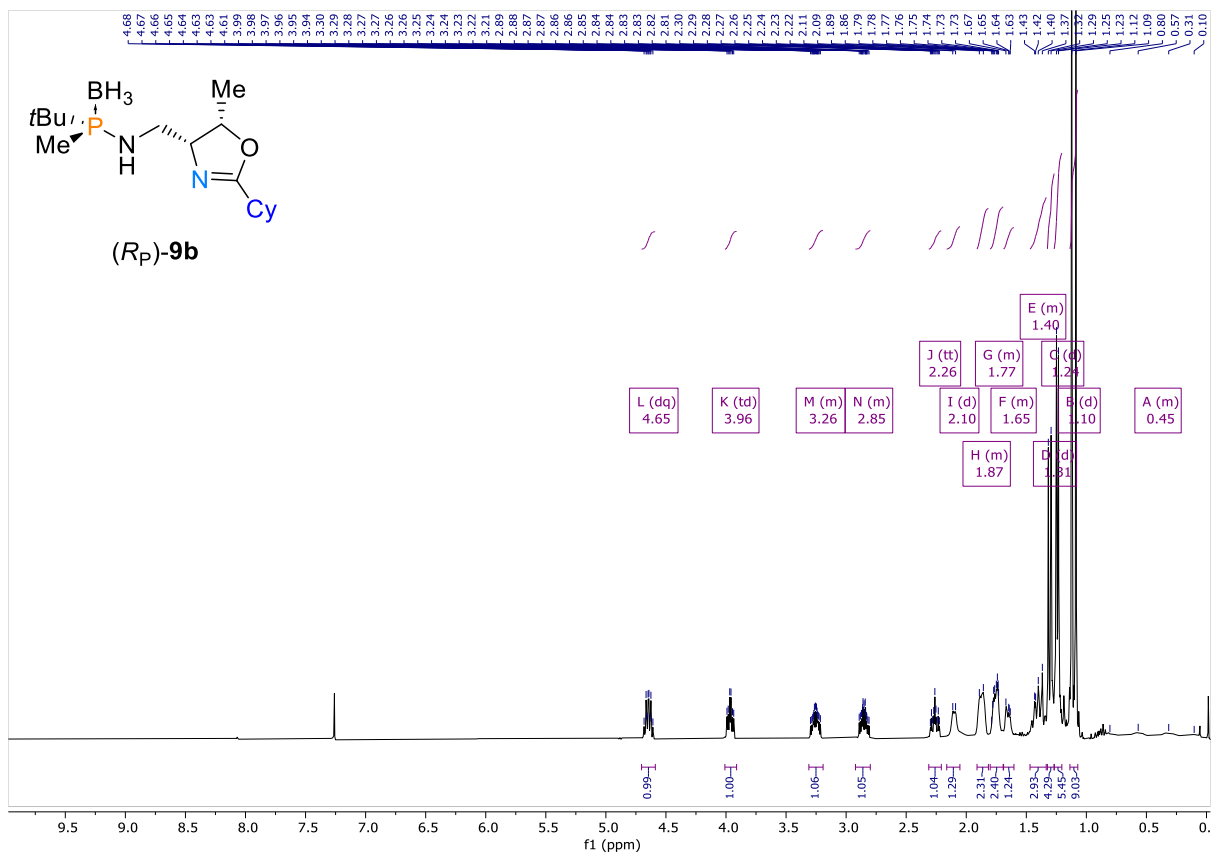

**<sup>13</sup>C-NMR (101 MHz, CDCl<sub>3</sub>):**

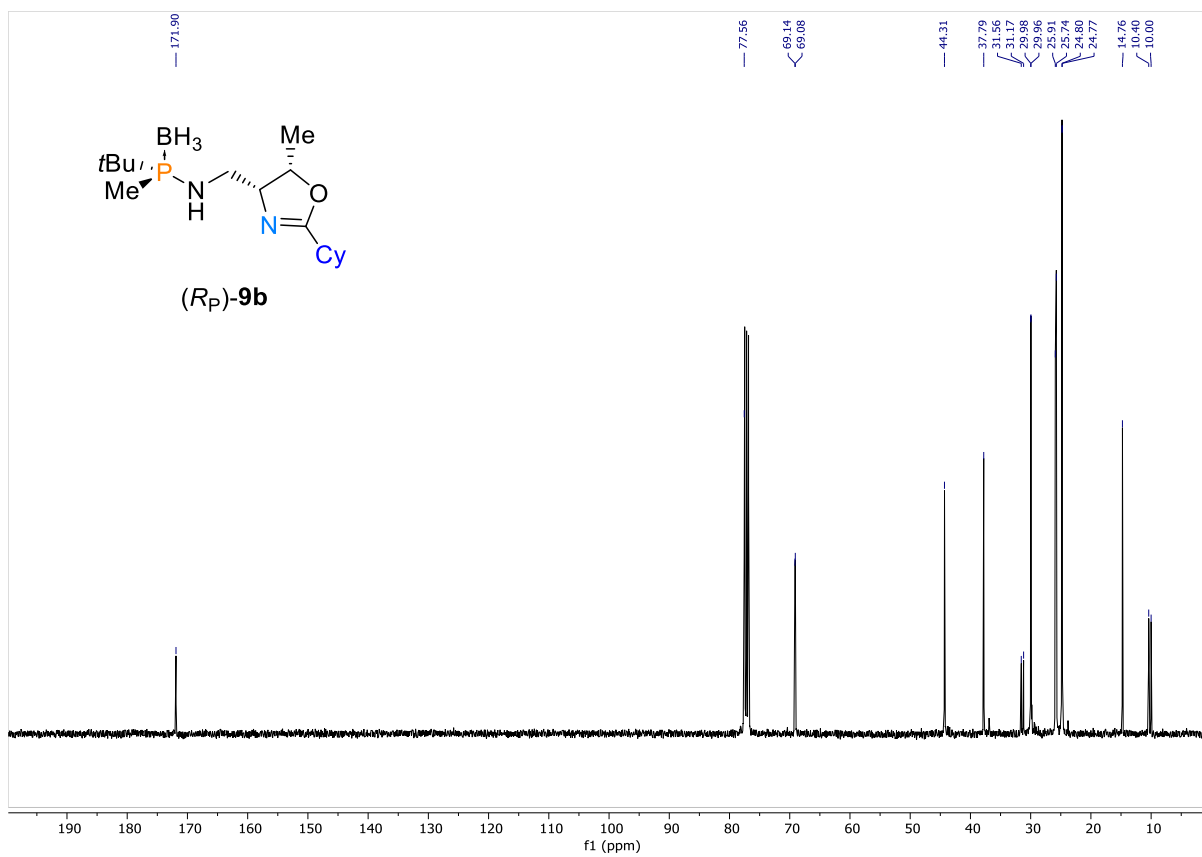

**<sup>31</sup>P-NMR (162 MHz, CDCl<sub>3</sub>):**

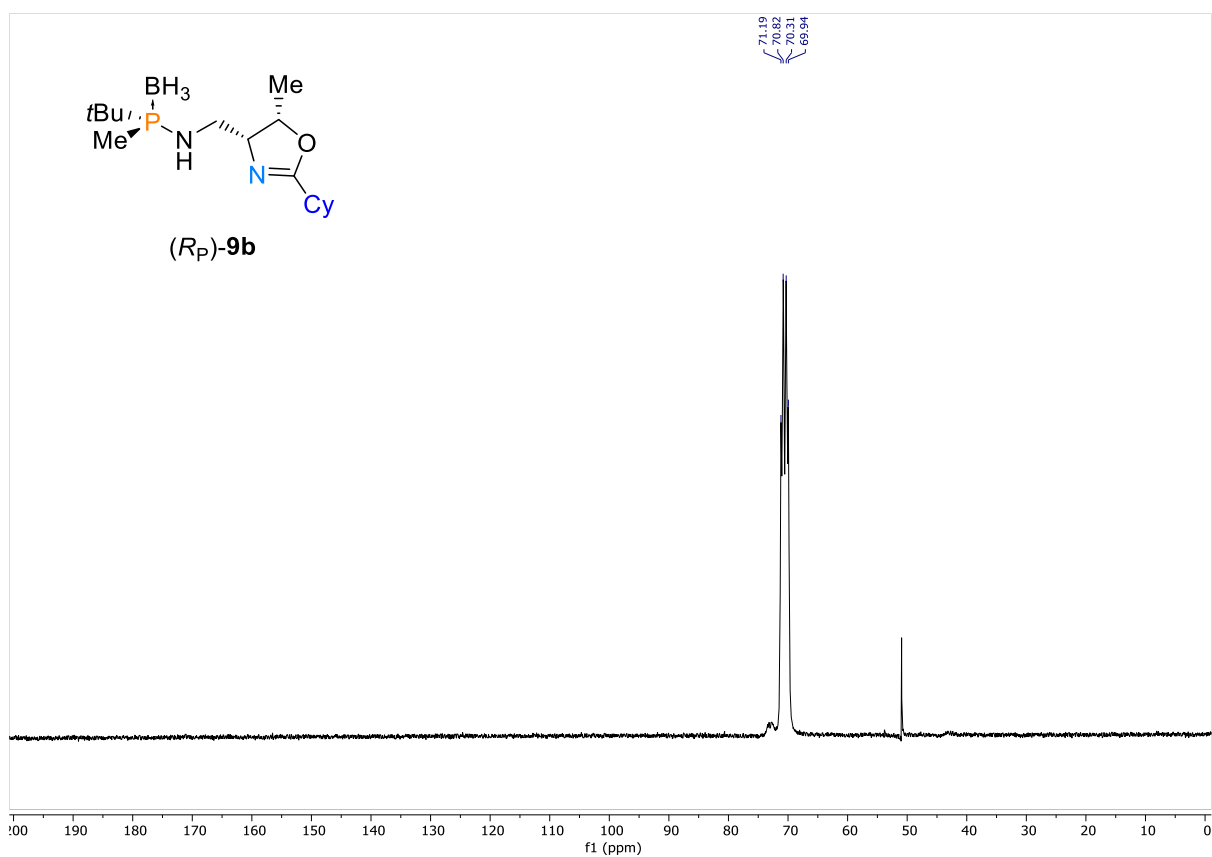

<sup>1</sup>H-NMR (400 MHz, CDCl<sub>3</sub>):

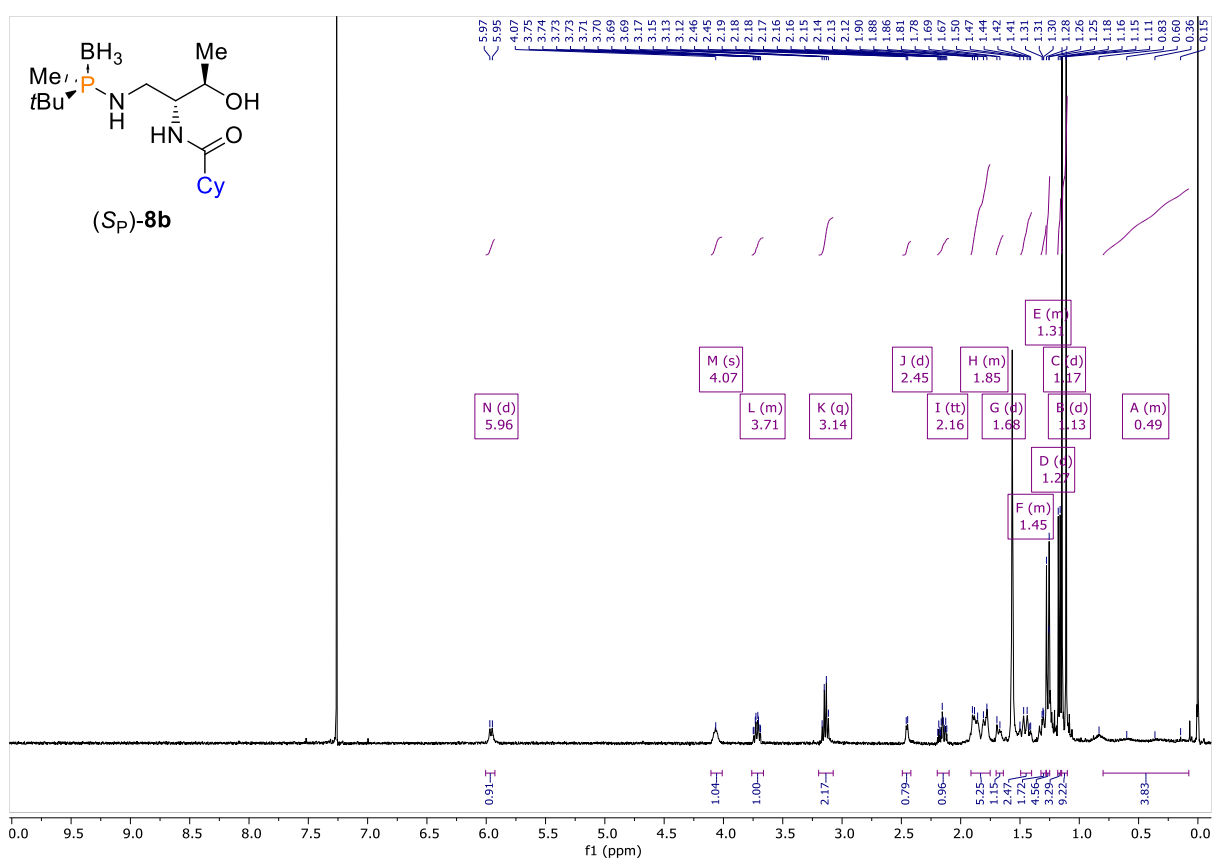

<sup>1</sup>H-NMR (400 MHz, CDCl<sub>3</sub>):

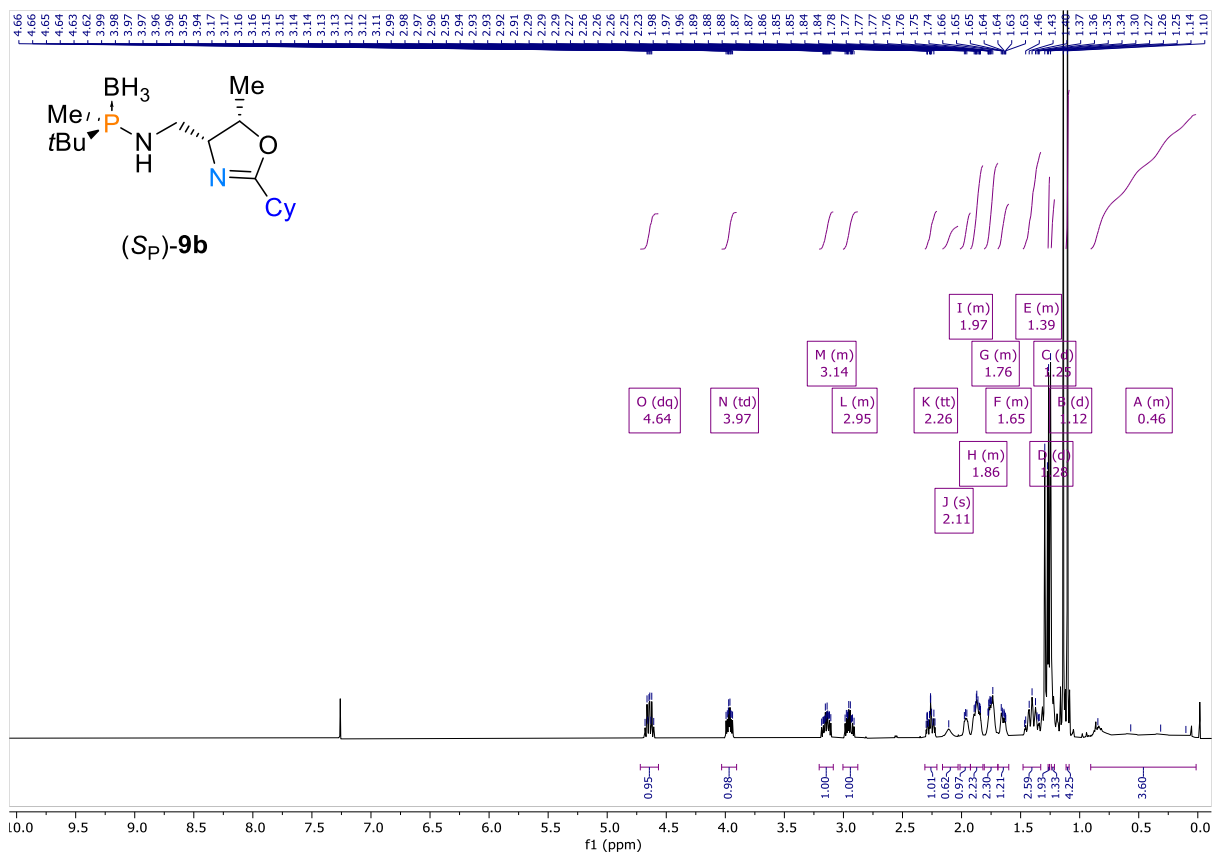

<sup>13</sup>C-NMR (101 MHz, CDCl<sub>3</sub>):

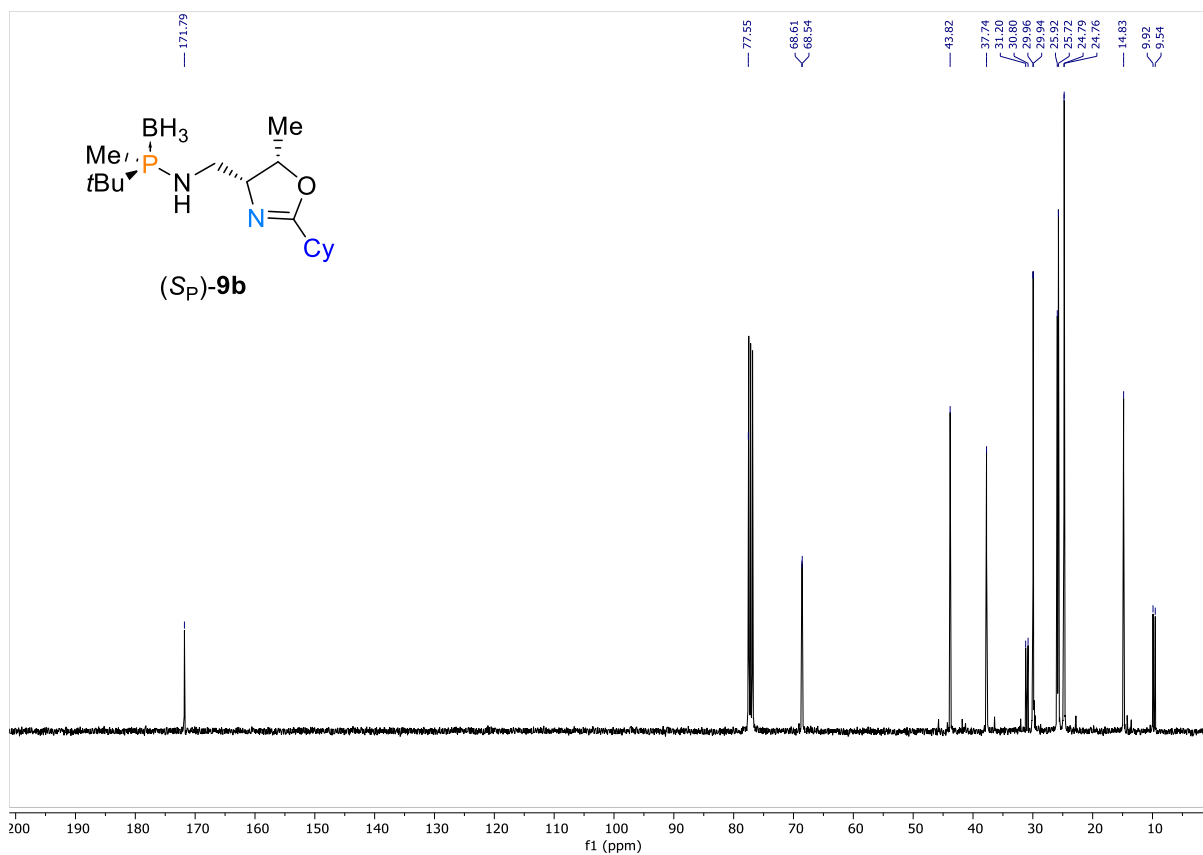

<sup>31</sup>P-NMR (162 MHz, CDCl<sub>3</sub>):

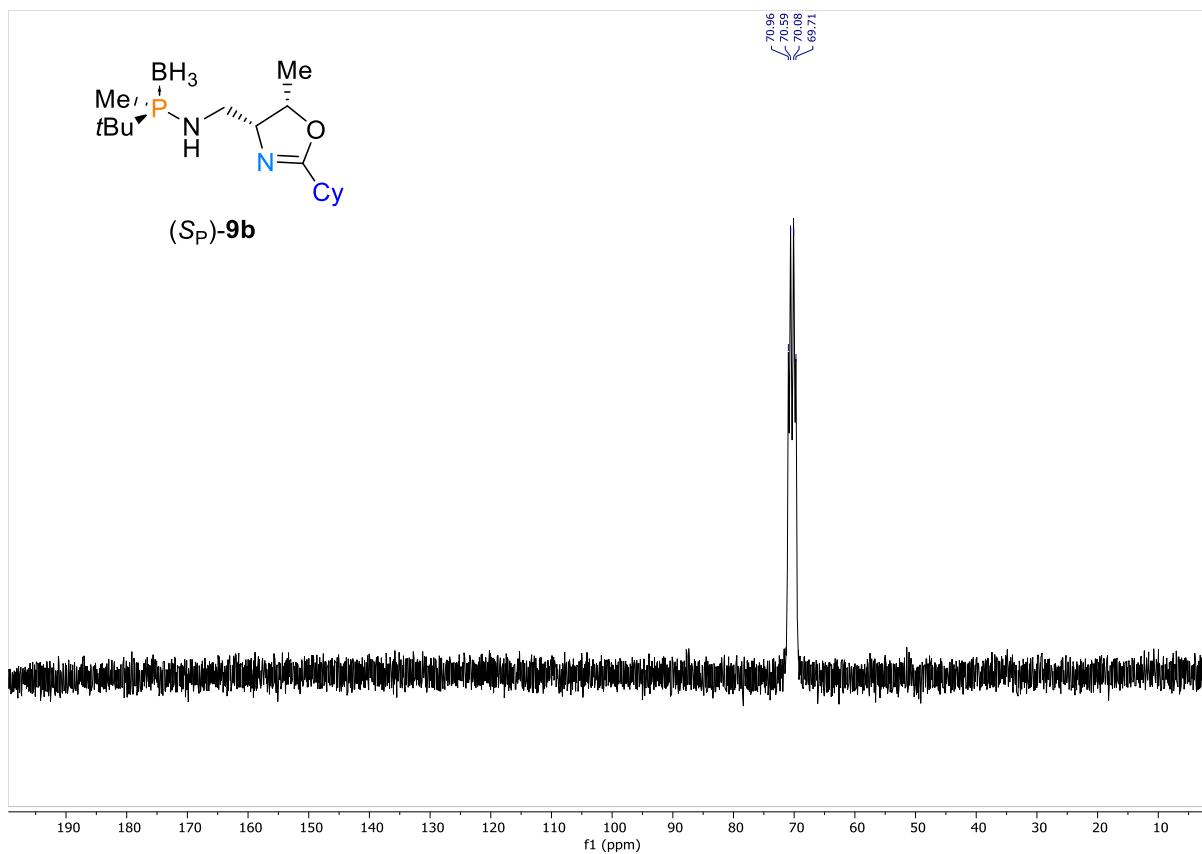

<sup>1</sup>H-NMR (400 MHz, CDCl<sub>3</sub>):

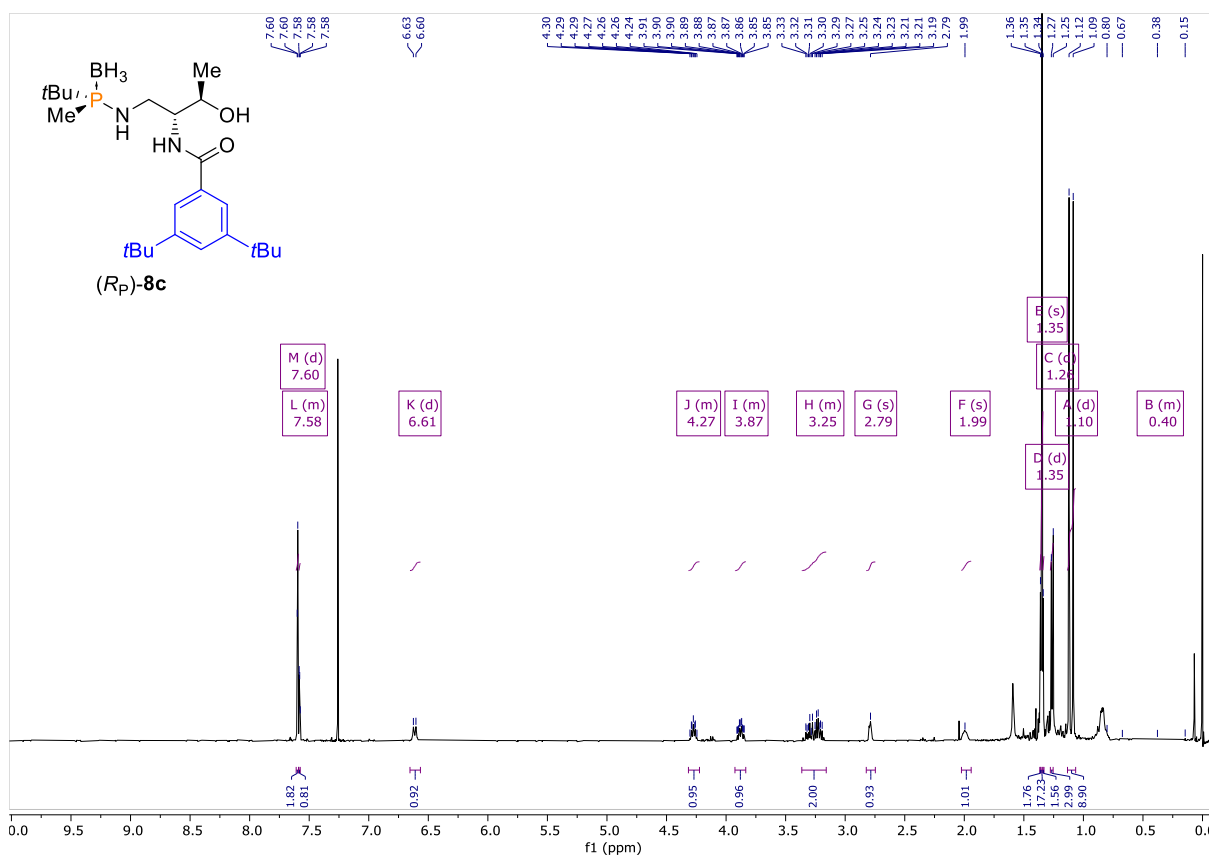

<sup>1</sup>H-NMR (400 MHz, CDCl<sub>3</sub>):



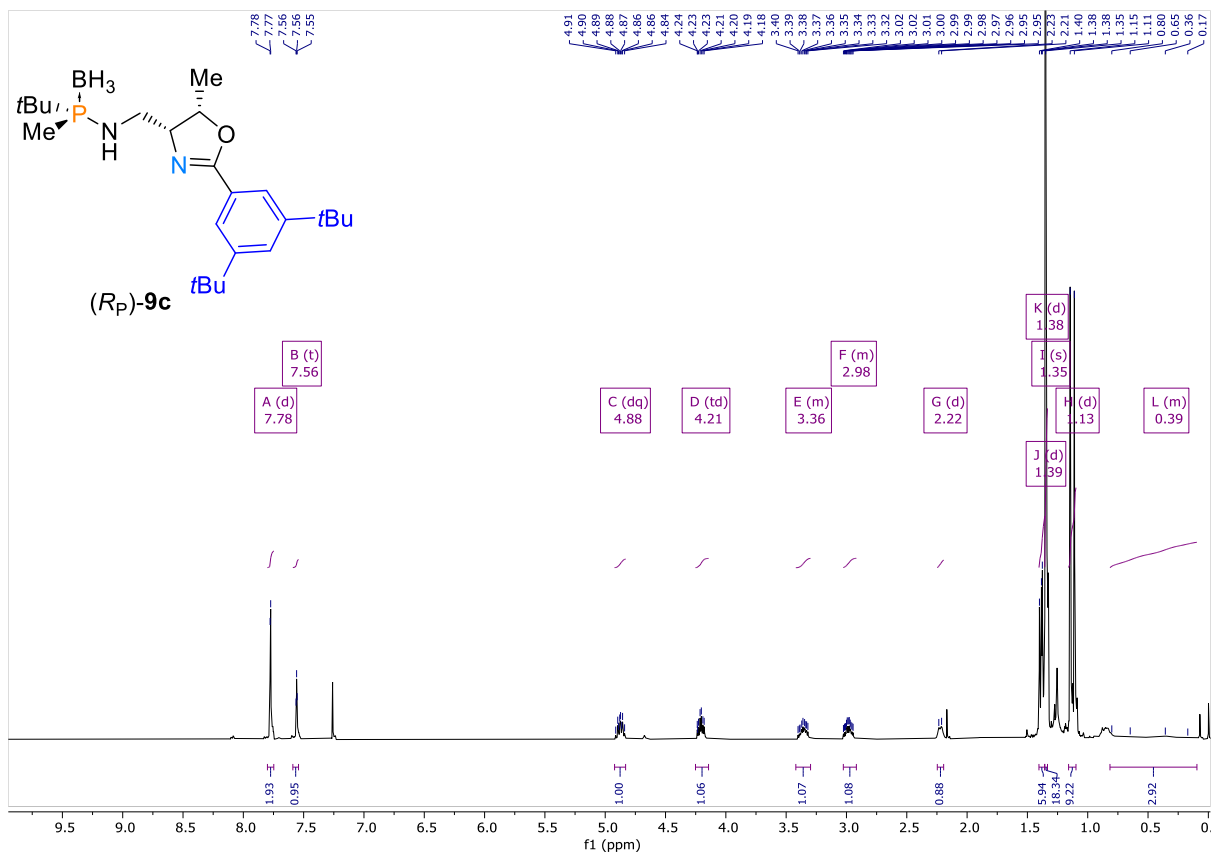

**<sup>13</sup>C-NMR (101 MHz, CDCl<sub>3</sub>):**

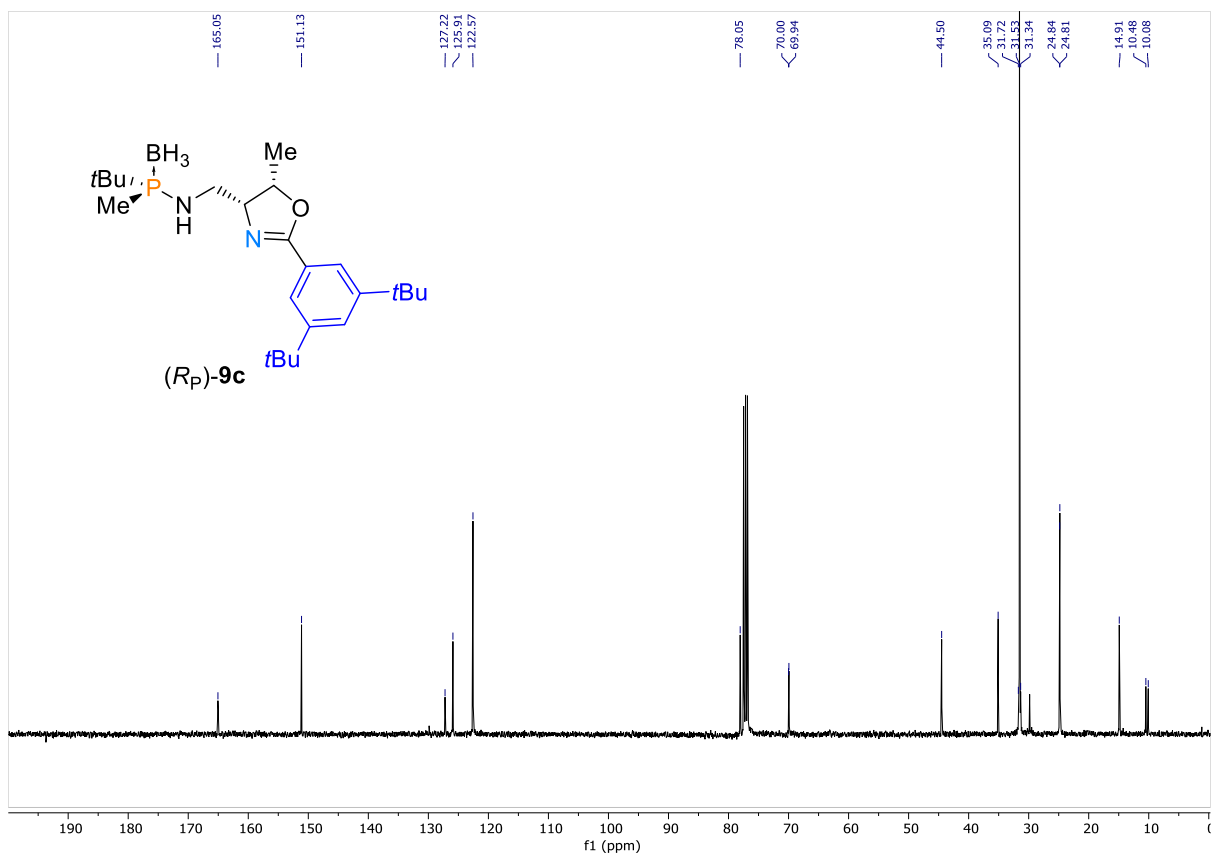

**<sup>31</sup>P-NMR (162 MHz, CDCl<sub>3</sub>):**

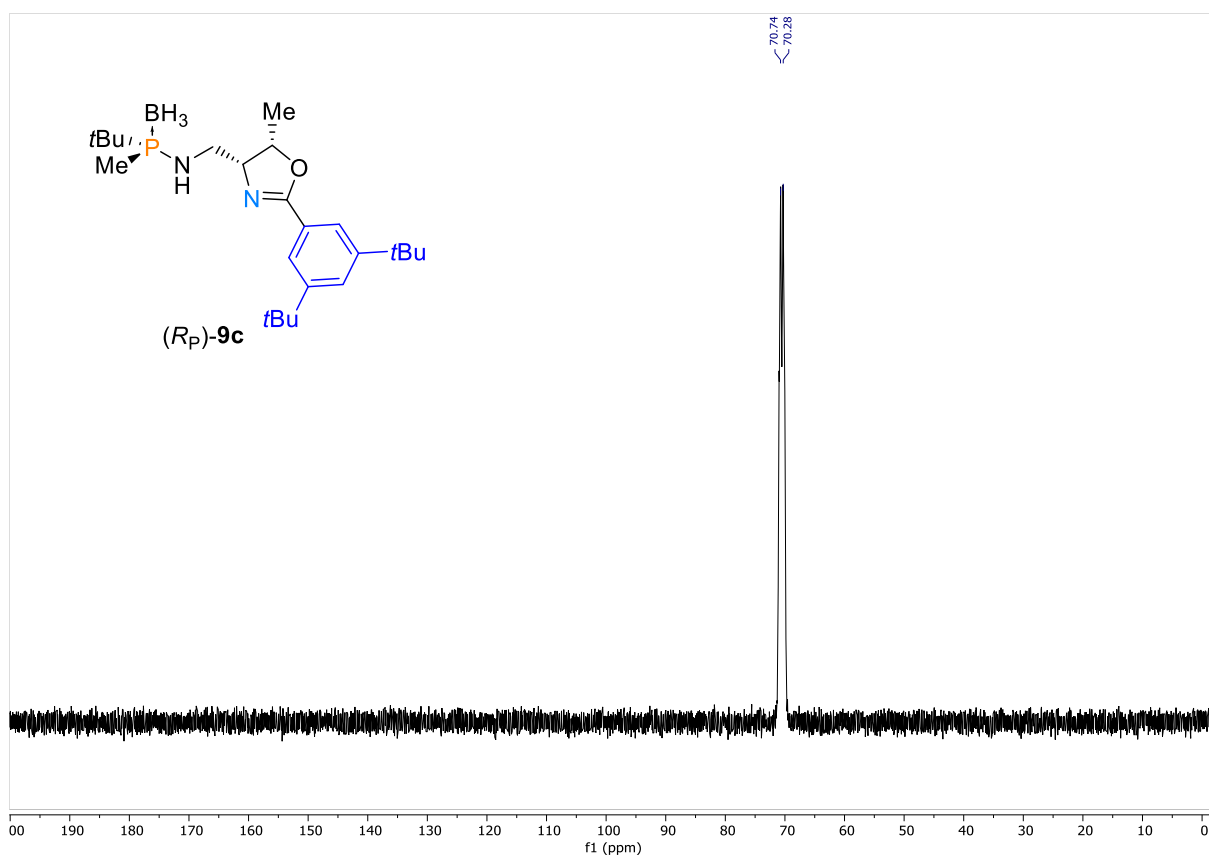

<sup>1</sup>H-NMR (400 MHz, CDCl<sub>3</sub>):

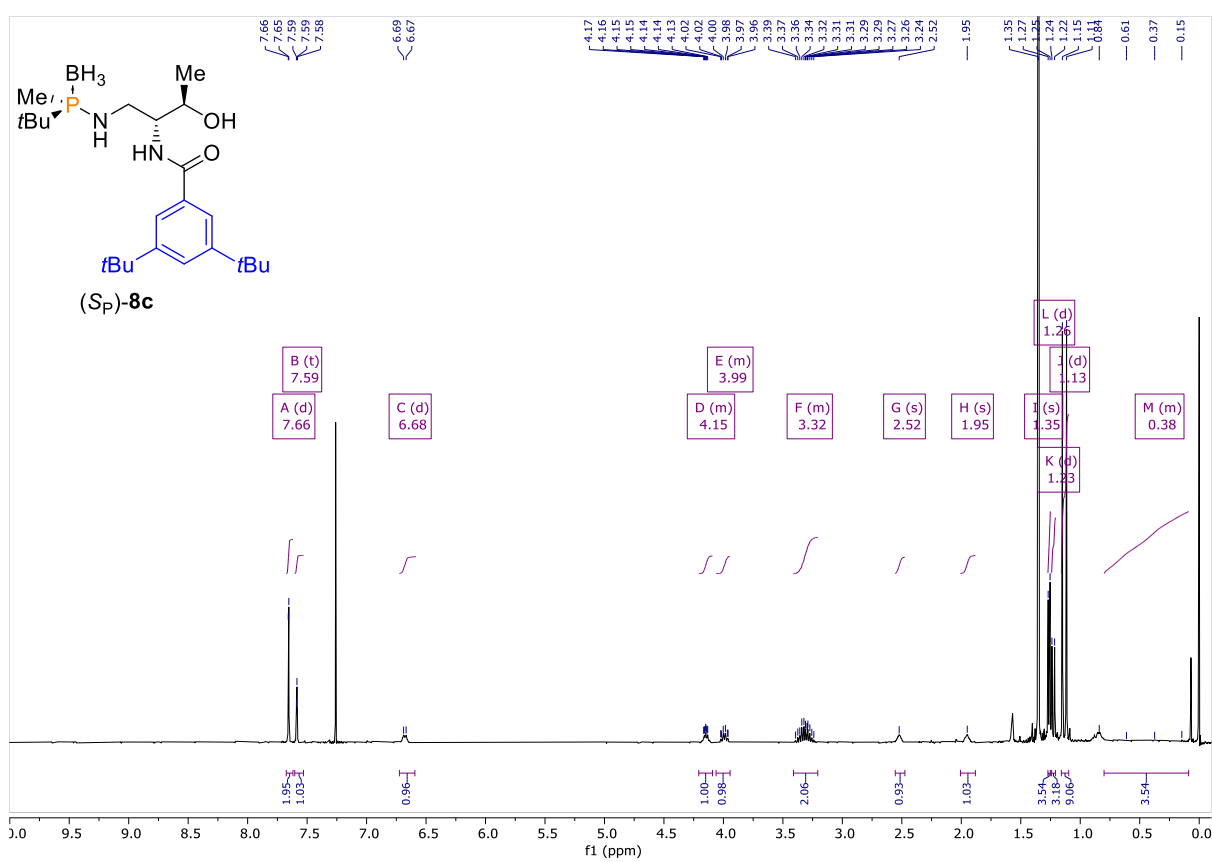

<sup>1</sup>H-NMR (400 MHz, CDCl<sub>3</sub>):

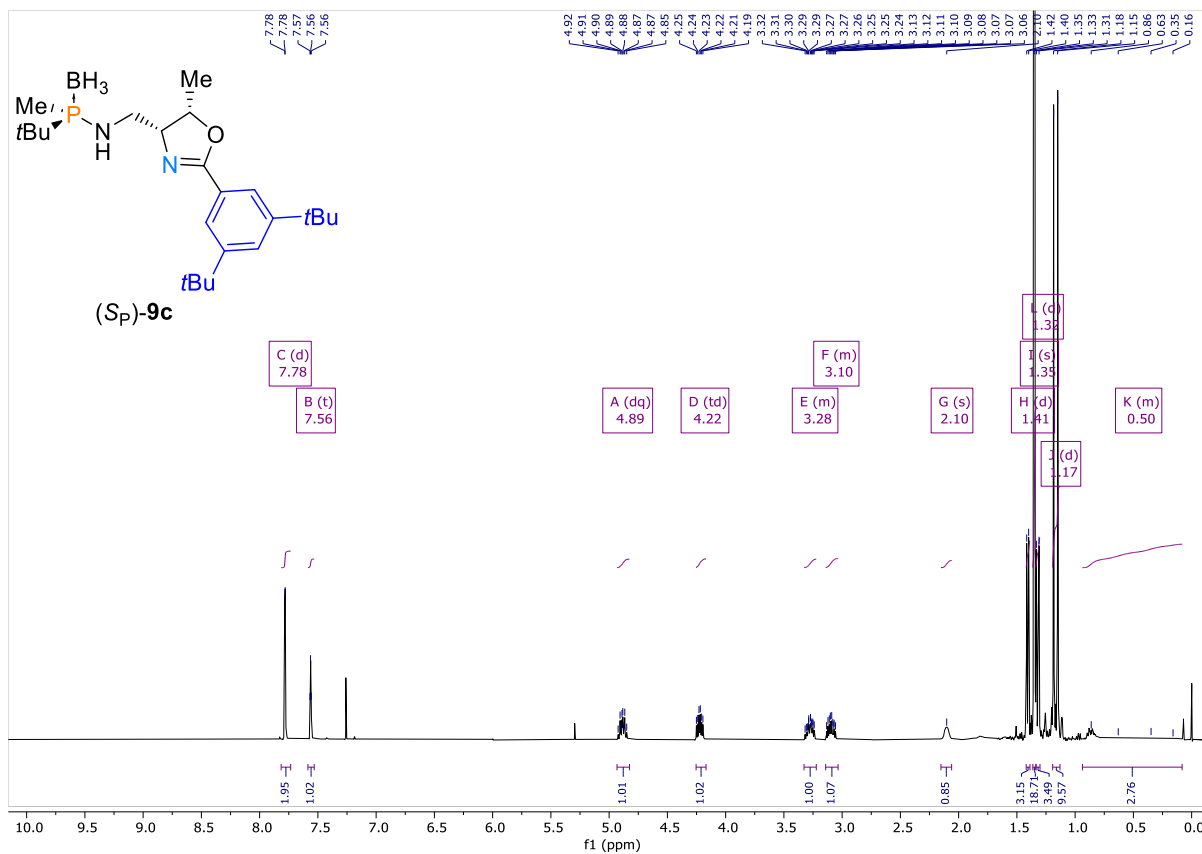

**<sup>13</sup>C-NMR (101 MHz, CDCl<sub>3</sub>):**

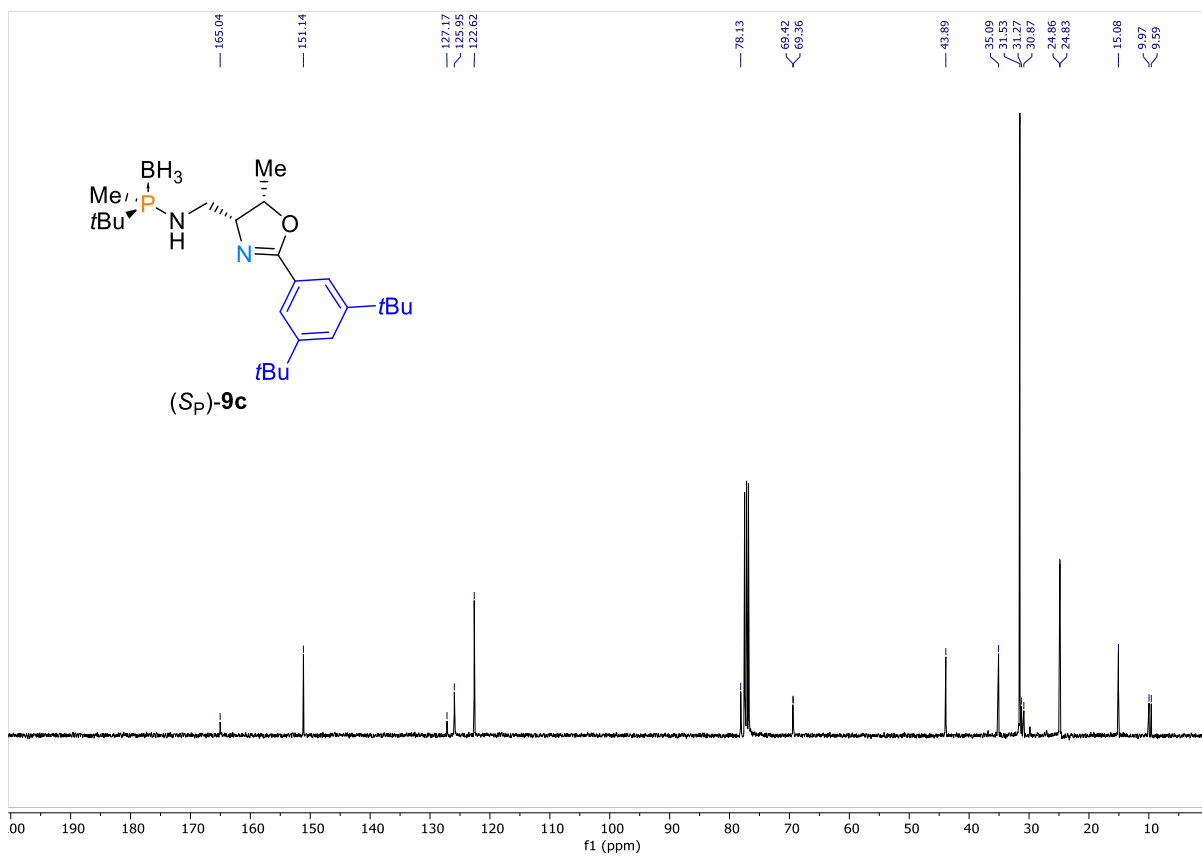

**<sup>31</sup>P-NMR (162 MHz, CDCl<sub>3</sub>):**

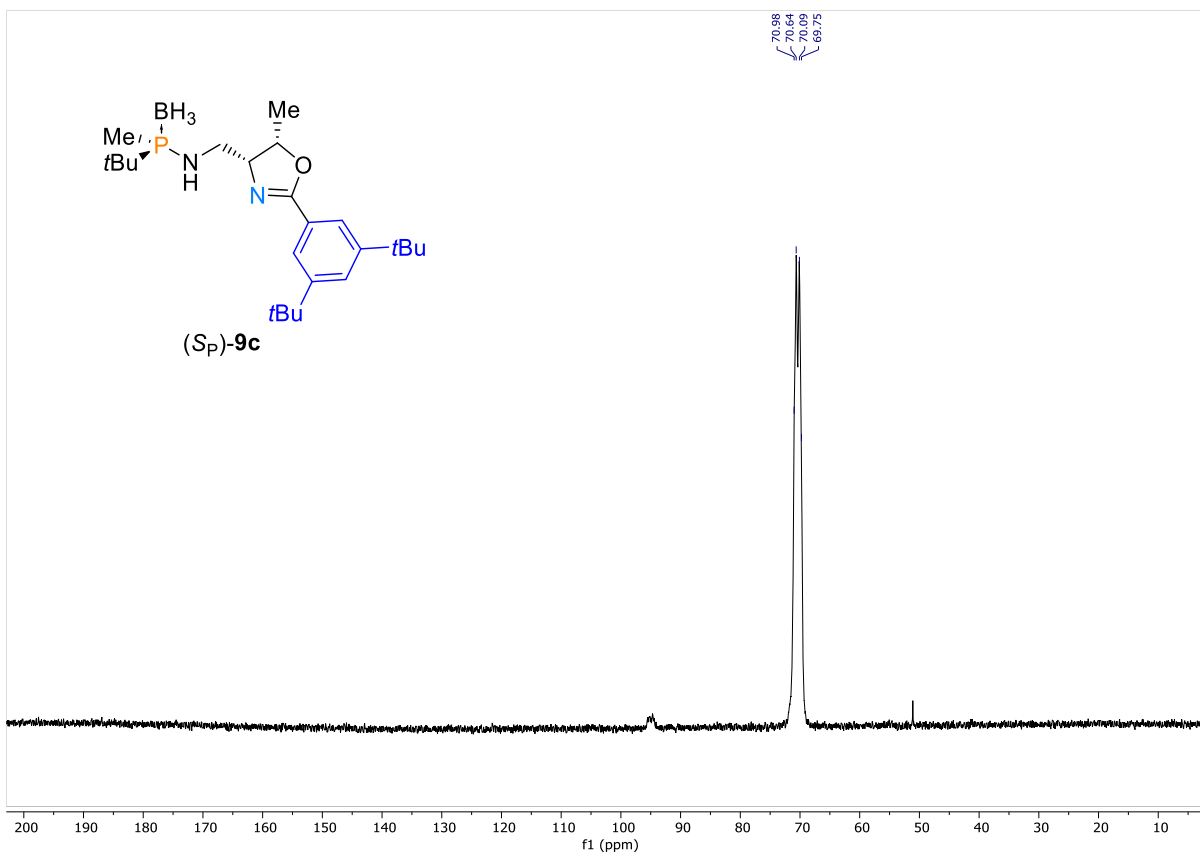

<sup>1</sup>H-NMR (400 MHz, CDCl<sub>3</sub>):

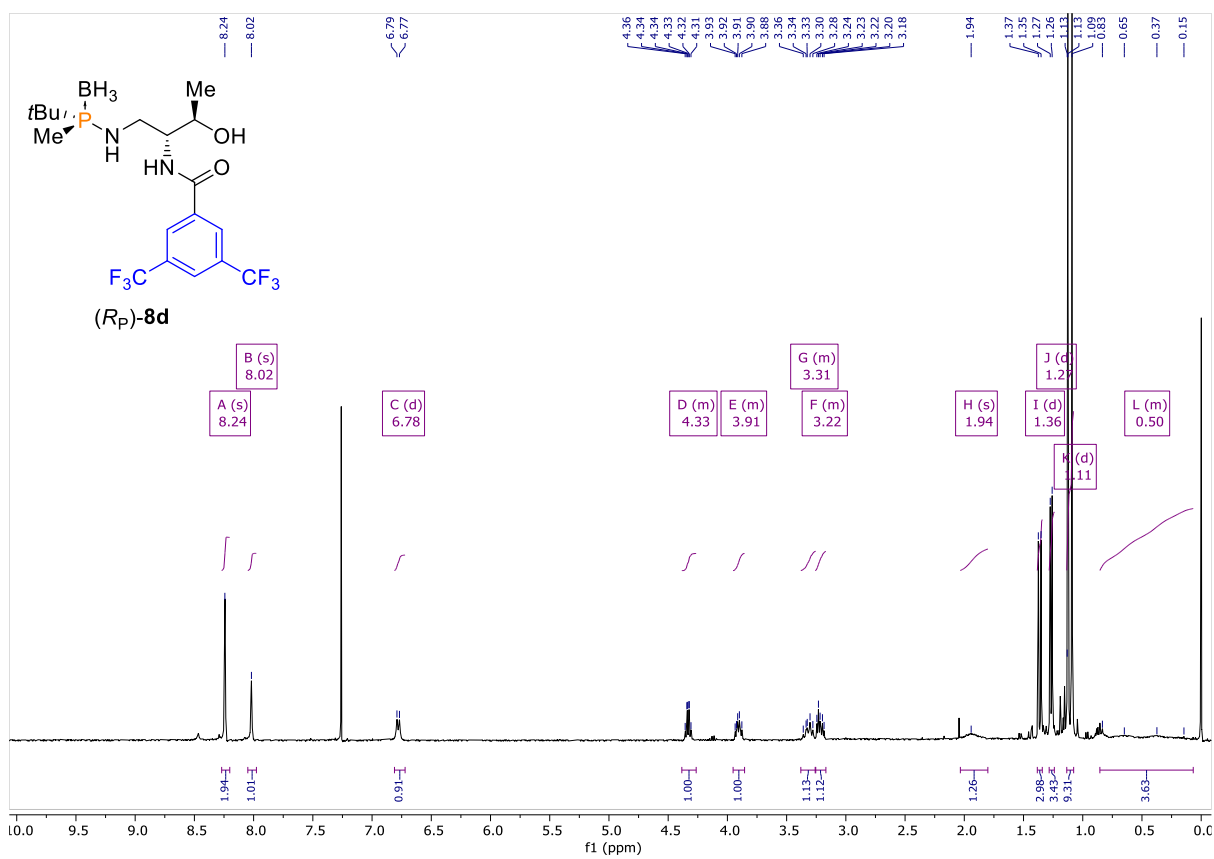

<sup>1</sup>H-NMR (400 MHz, CDCl<sub>3</sub>):

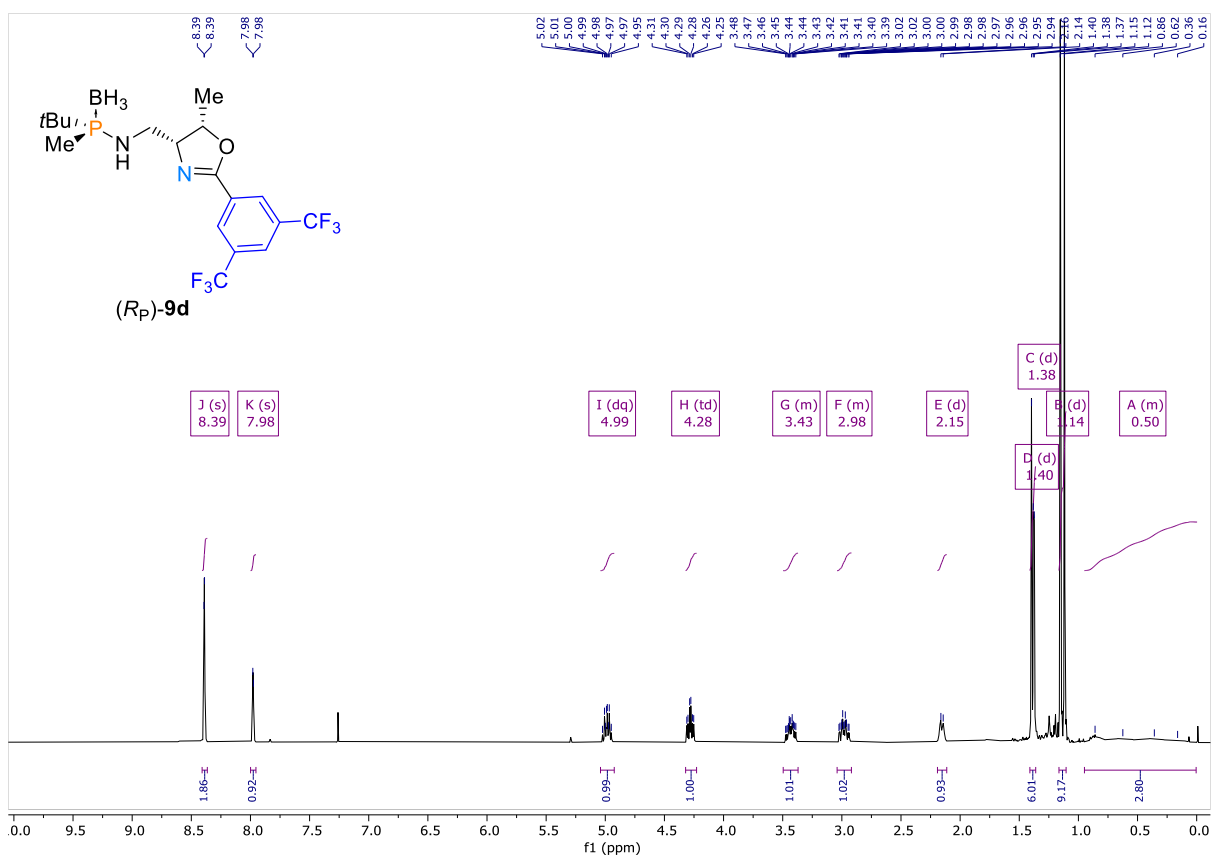

**<sup>13</sup>C-NMR (101 MHz, CDCl<sub>3</sub>):**

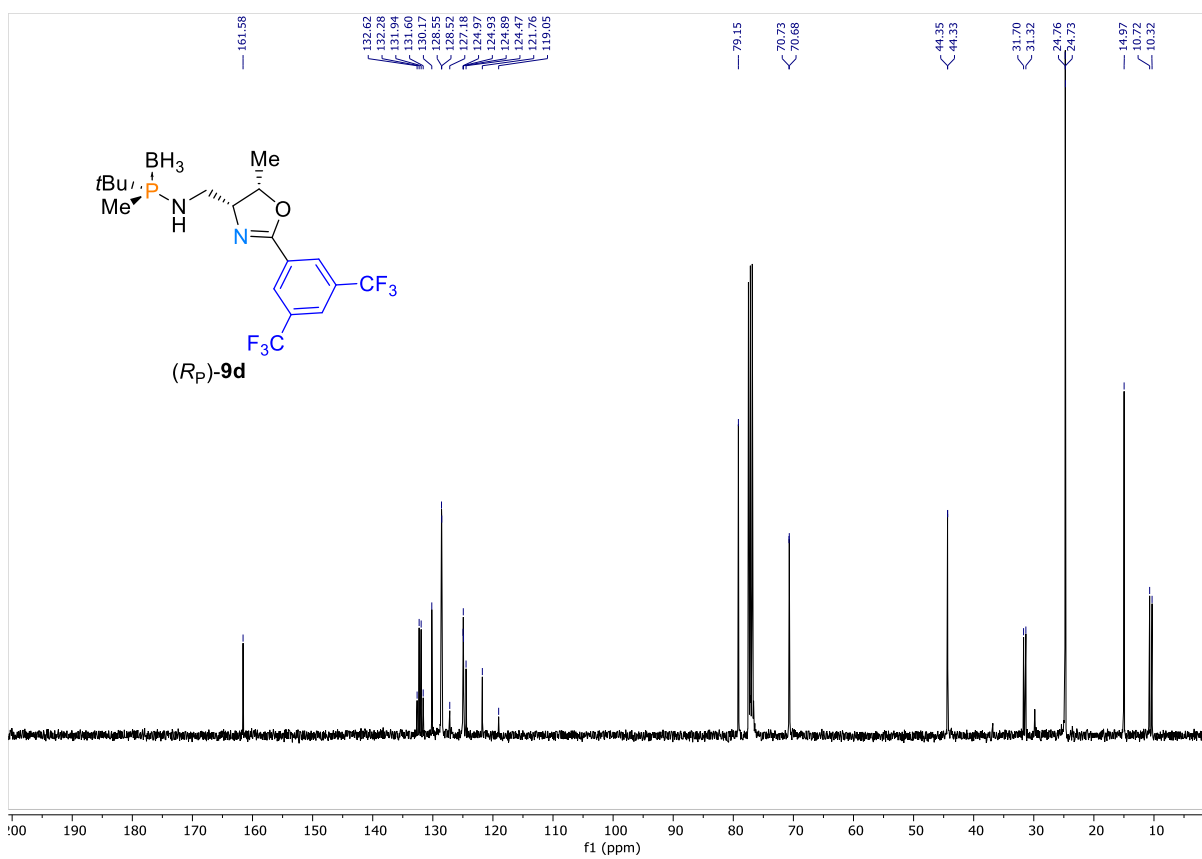

**<sup>31</sup>P-NMR (162 MHz, CDCl<sub>3</sub>):**

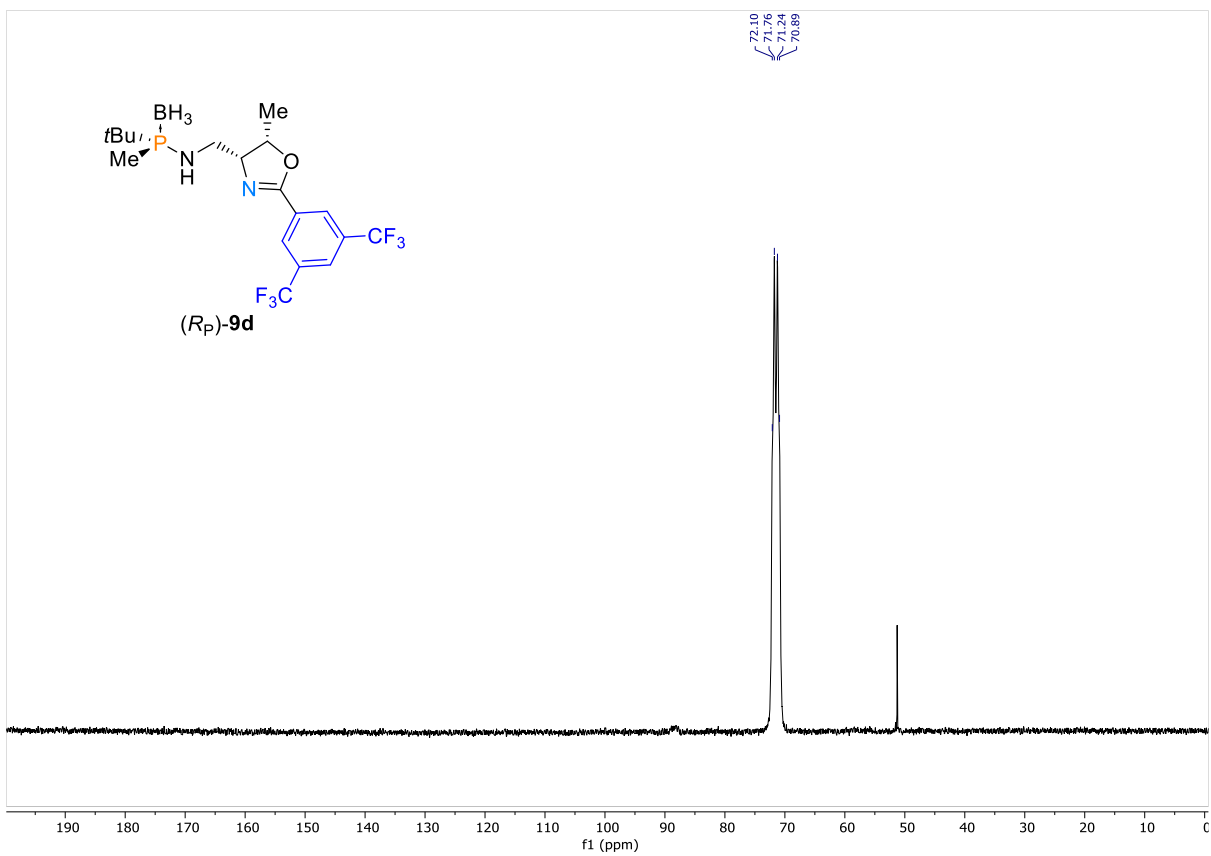

$^1\text{H-NMR}$  (400 MHz,  $\text{CDCl}_3$ ):

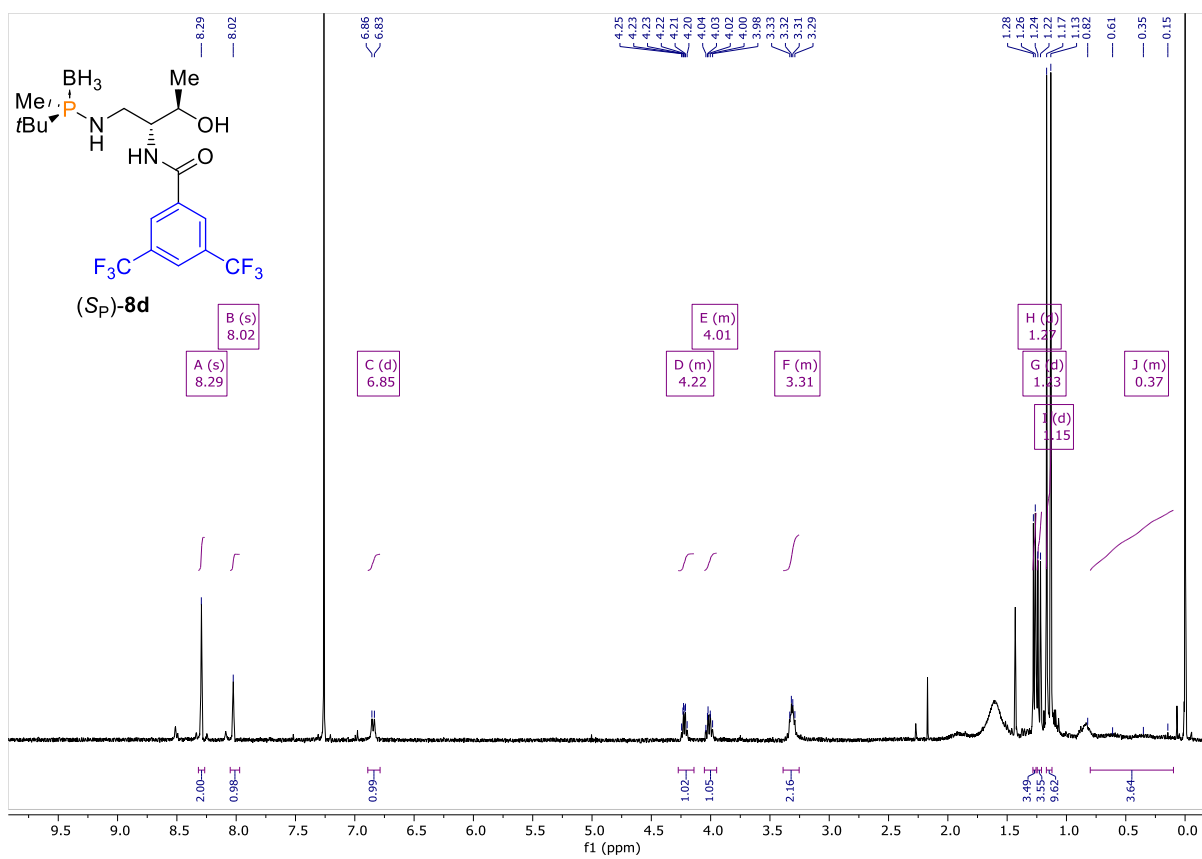

$^1\text{H-NMR}$  (400 MHz,  $\text{CDCl}_3$ ):

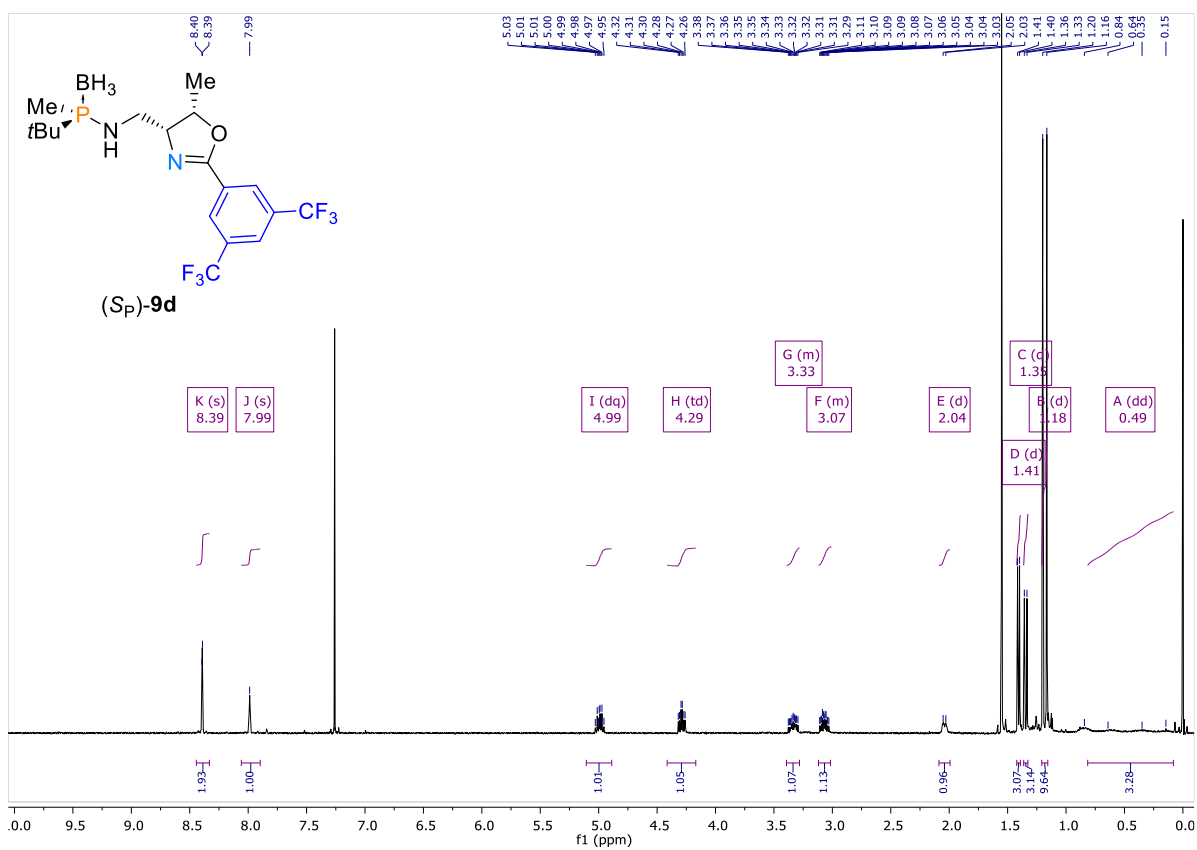

**<sup>13</sup>C-NMR (101 MHz, CDCl<sub>3</sub>):**

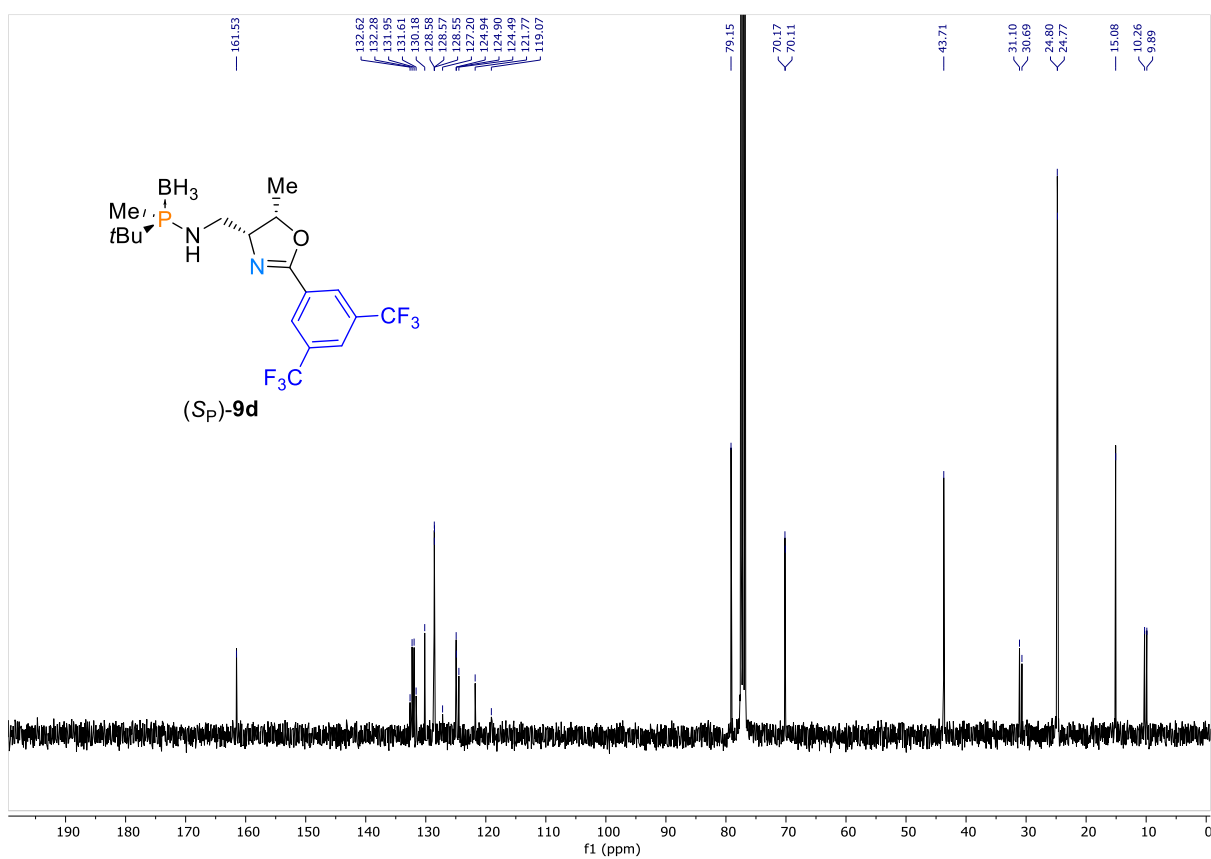

**<sup>31</sup>P-NMR (162 MHz, CDCl<sub>3</sub>):**

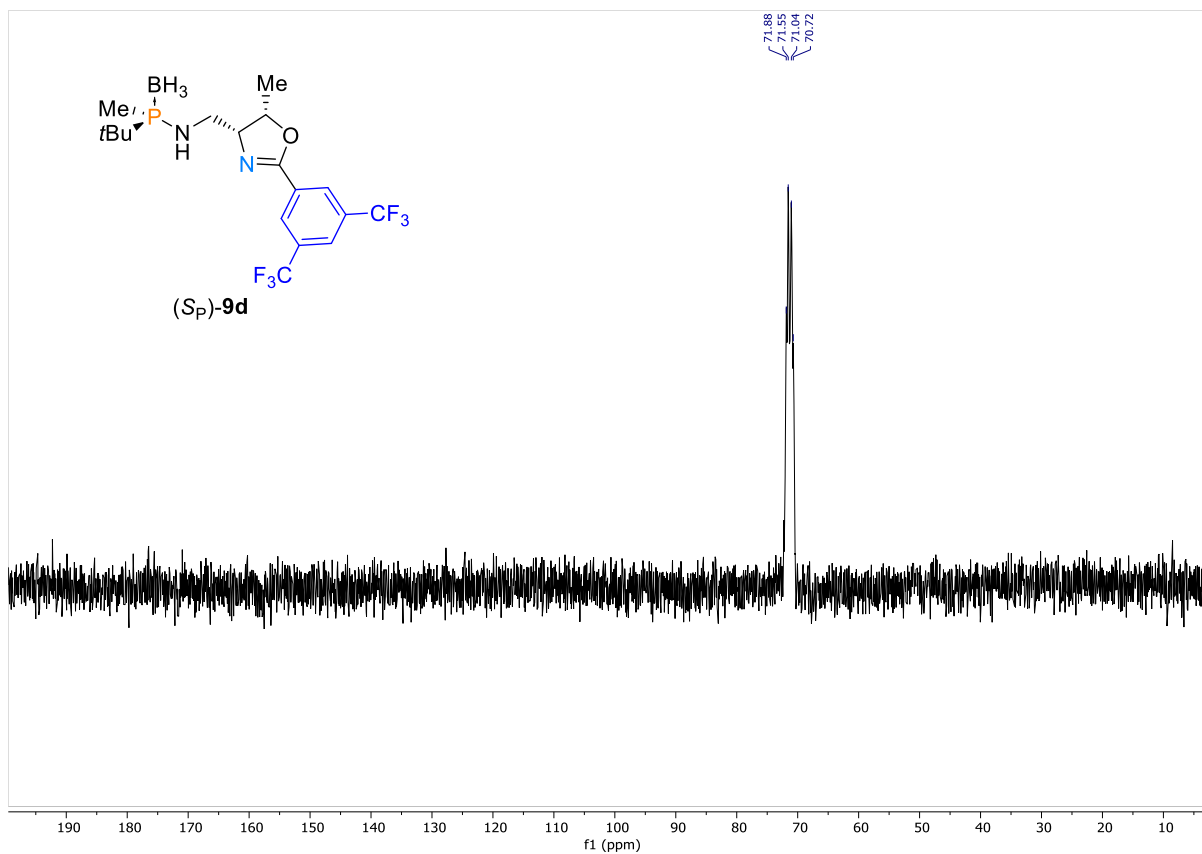

<sup>1</sup>H-NMR (400 MHz, CDCl<sub>3</sub>):

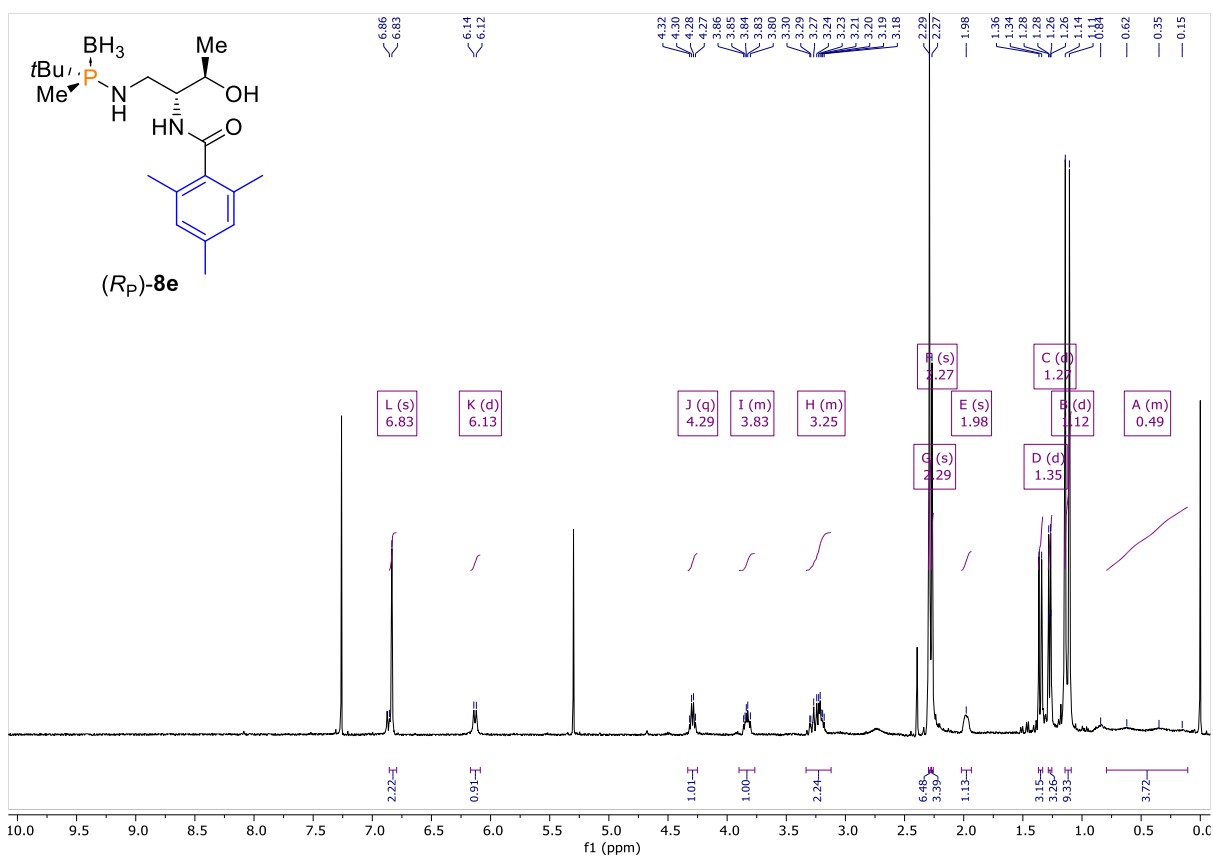

<sup>1</sup>H-NMR (400 MHz, CDCl<sub>3</sub>):



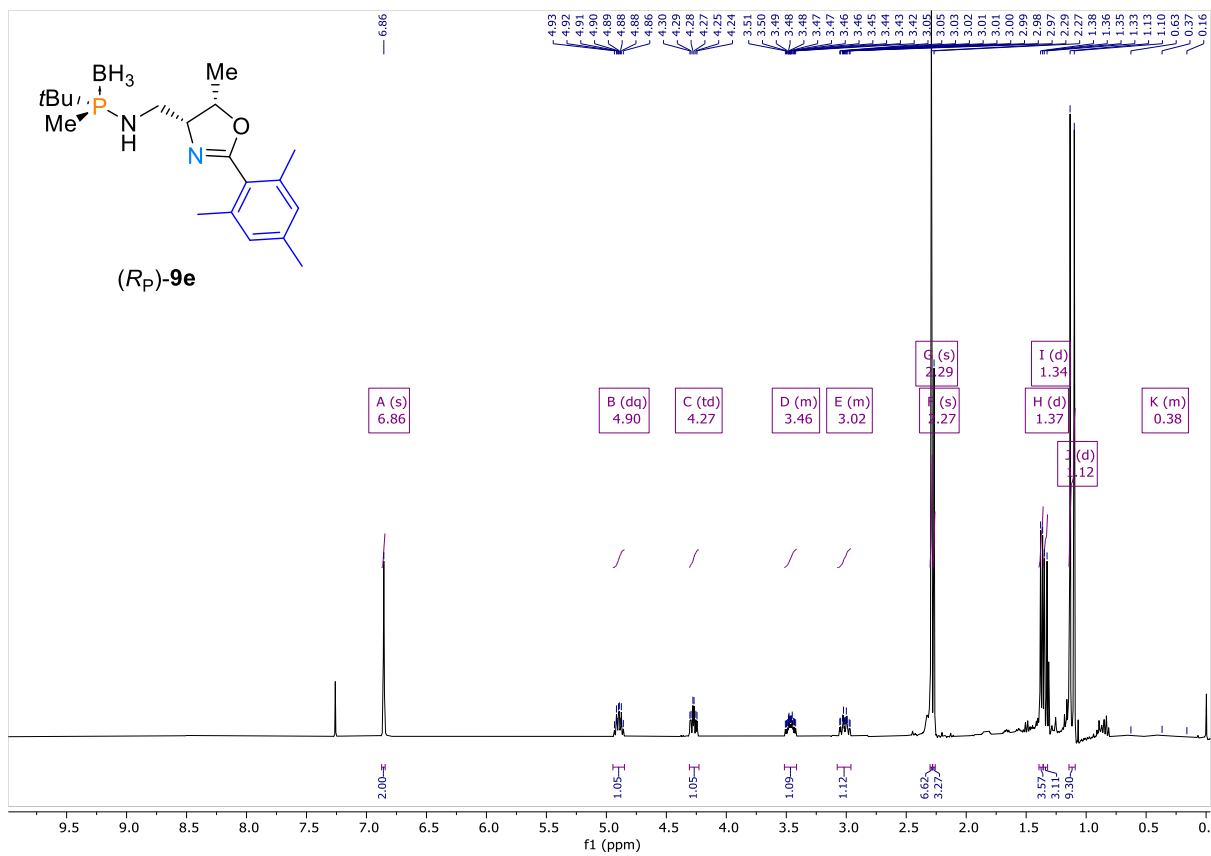

<sup>13</sup>C-NMR (101 MHz, CDCl<sub>3</sub>):

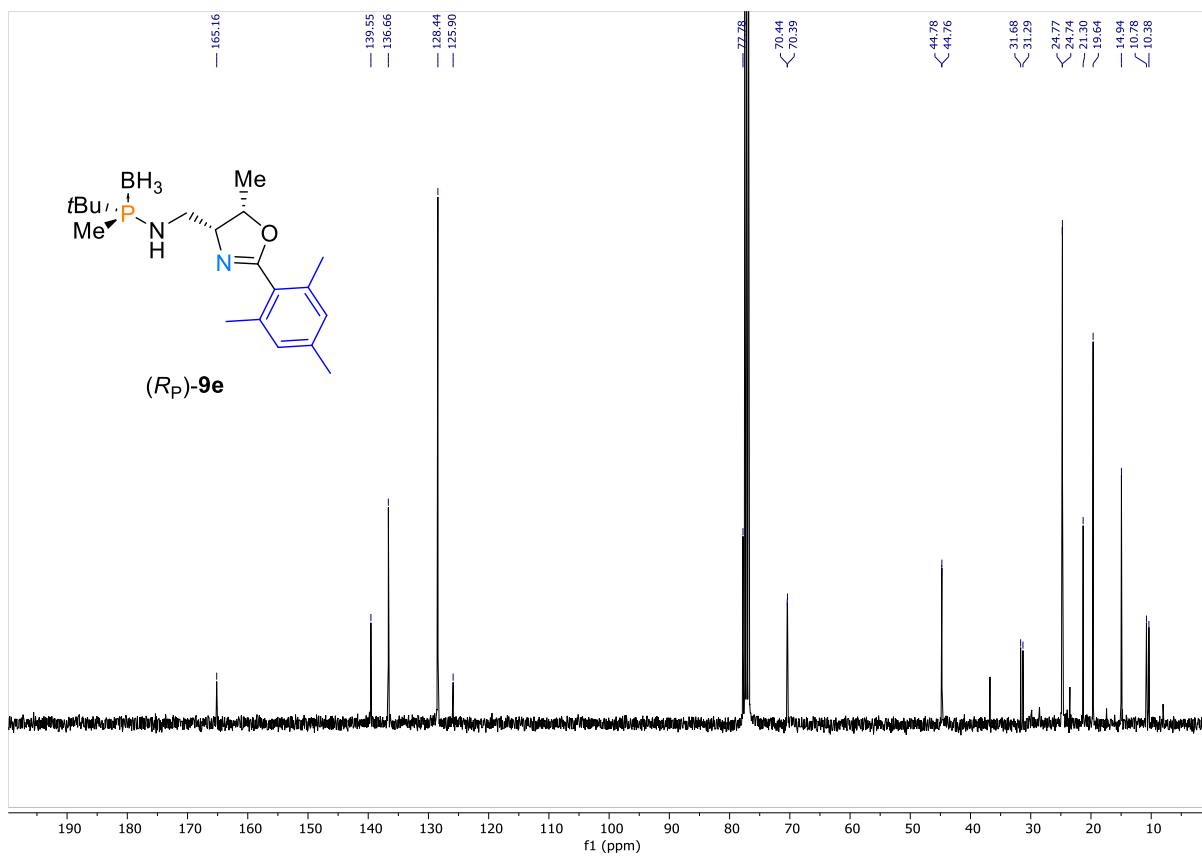

<sup>31</sup>P-NMR (162 MHz, CDCl<sub>3</sub>):

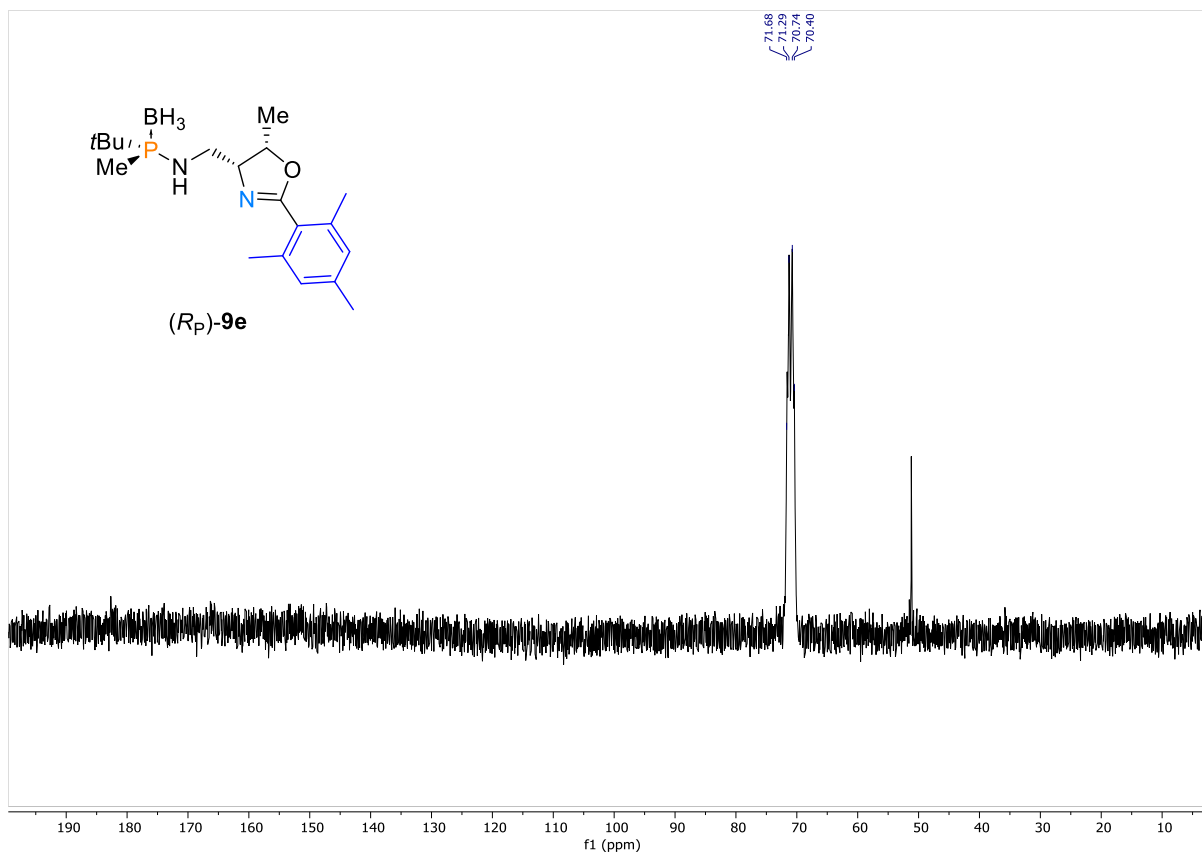

<sup>1</sup>H-NMR (400 MHz, CDCl<sub>3</sub>):

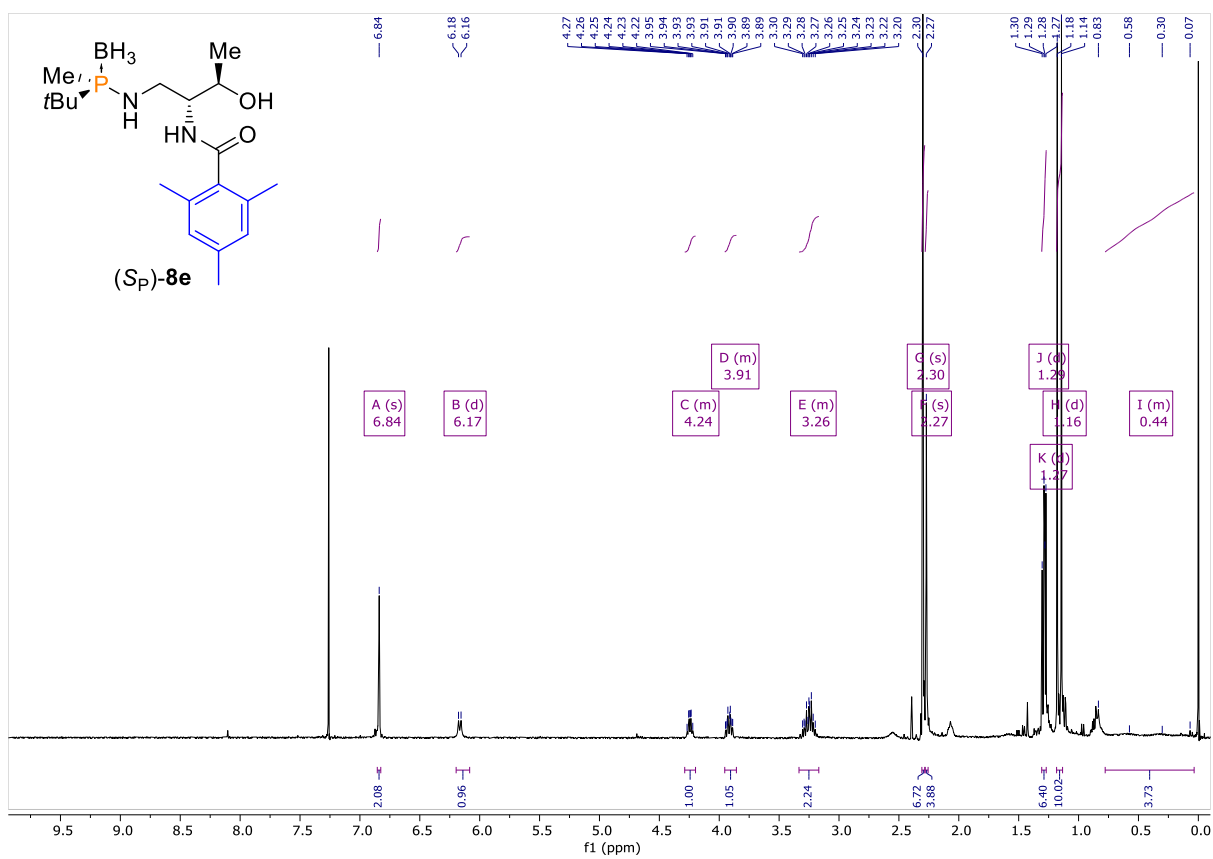

<sup>1</sup>H-NMR (400 MHz, CDCl<sub>3</sub>):



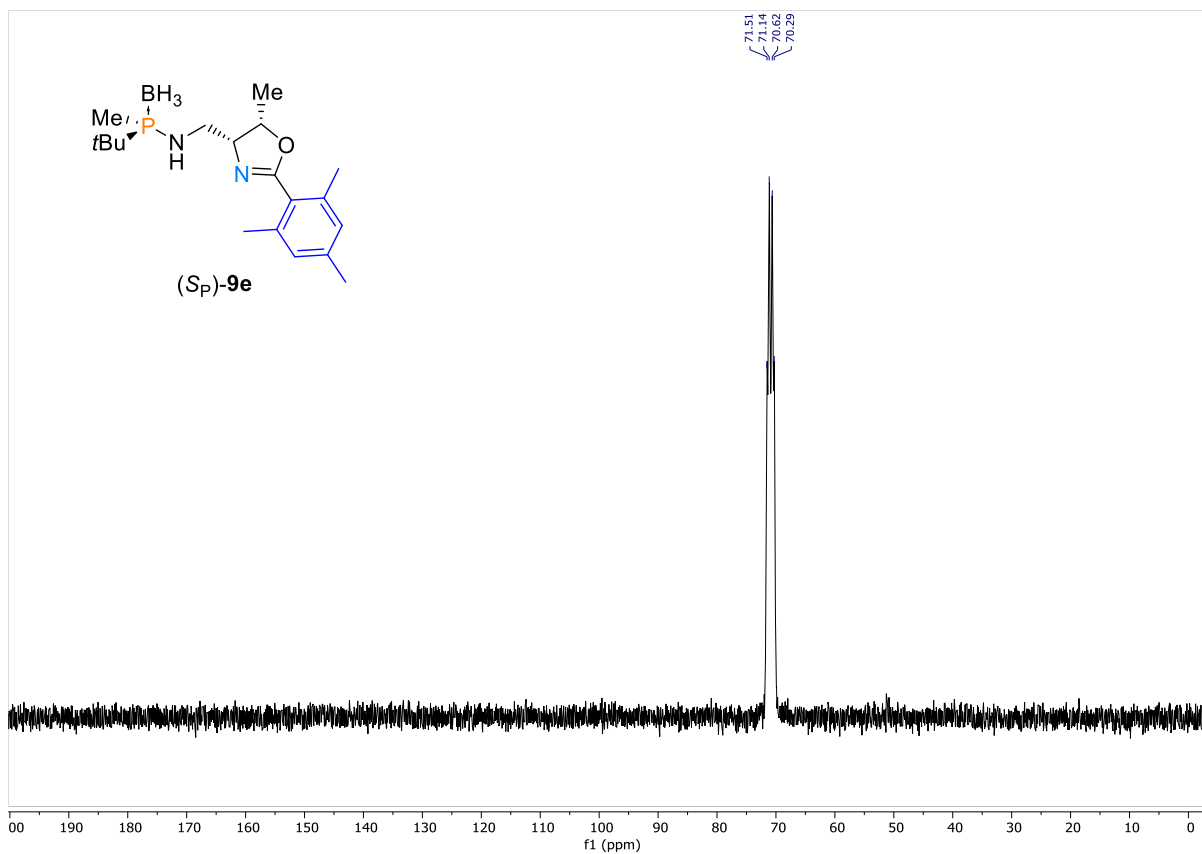

<sup>1</sup>H-NMR (400 MHz, CDCl<sub>3</sub>):

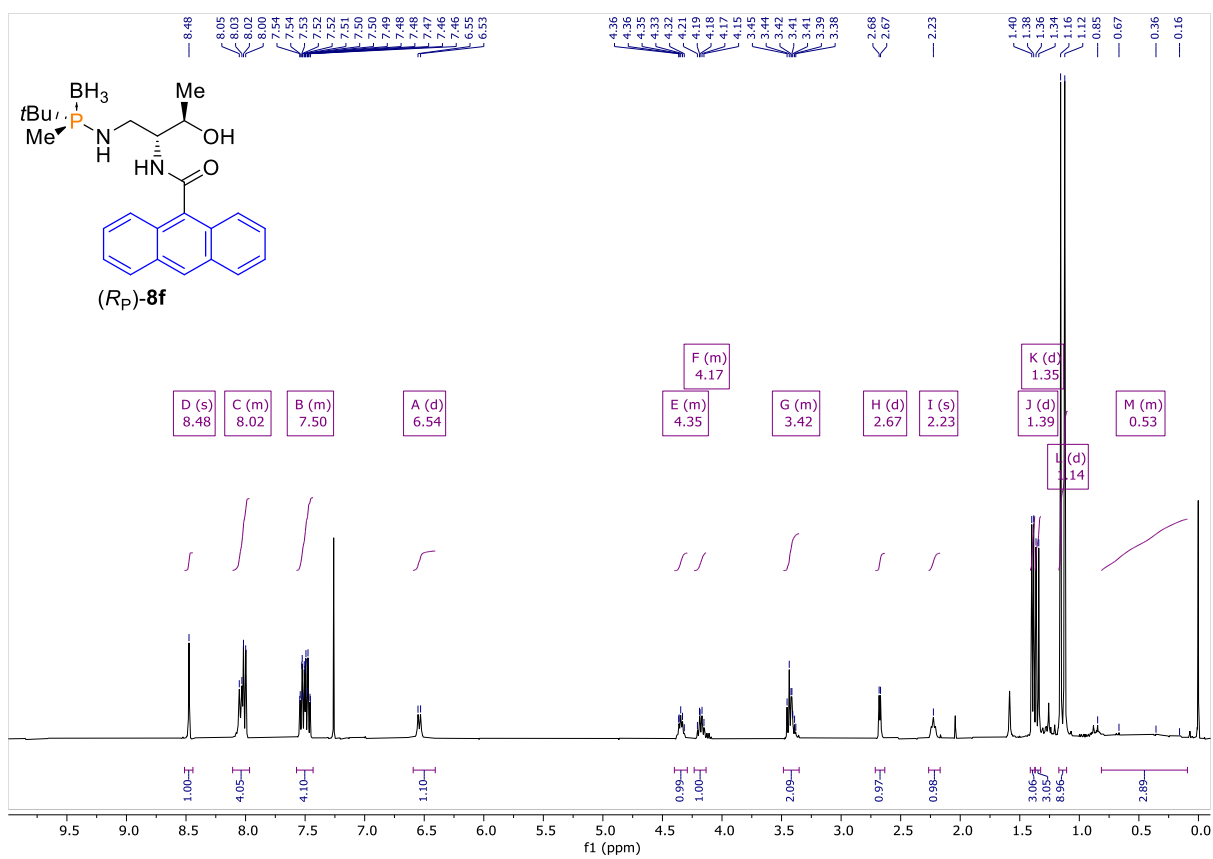

<sup>1</sup>H-NMR (400 MHz, CDCl<sub>3</sub>):

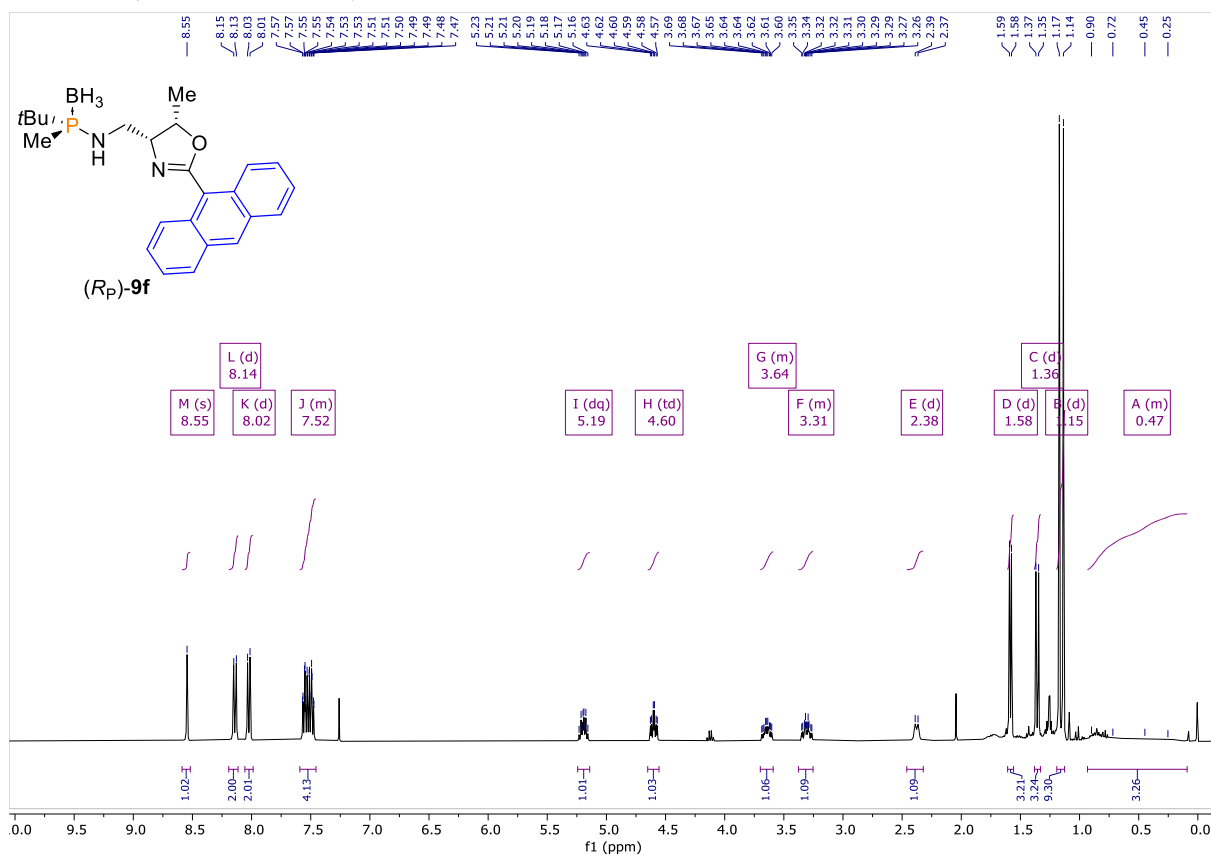

<sup>13</sup>C-NMR (101 MHz, CDCl<sub>3</sub>):

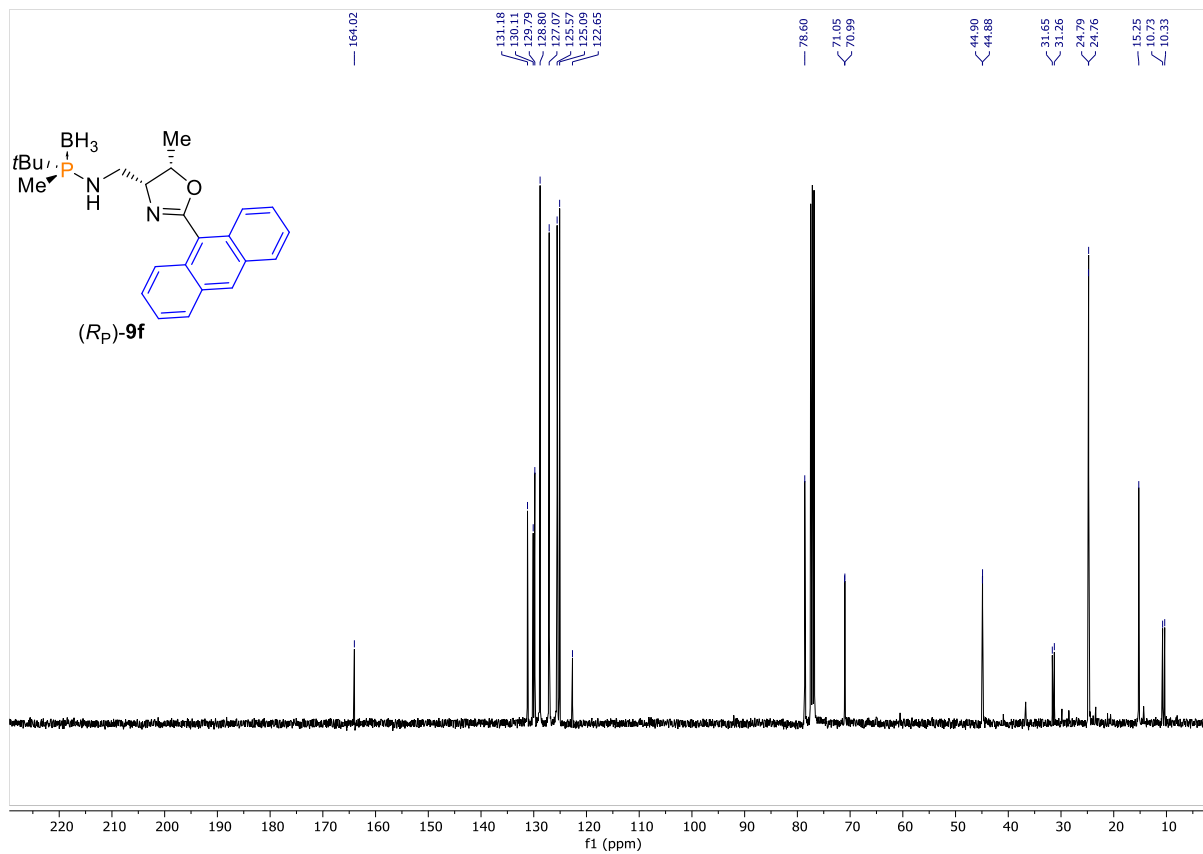

$^{31}\text{P}$ -NMR (162 MHz,  $\text{CDCl}_3$ ):

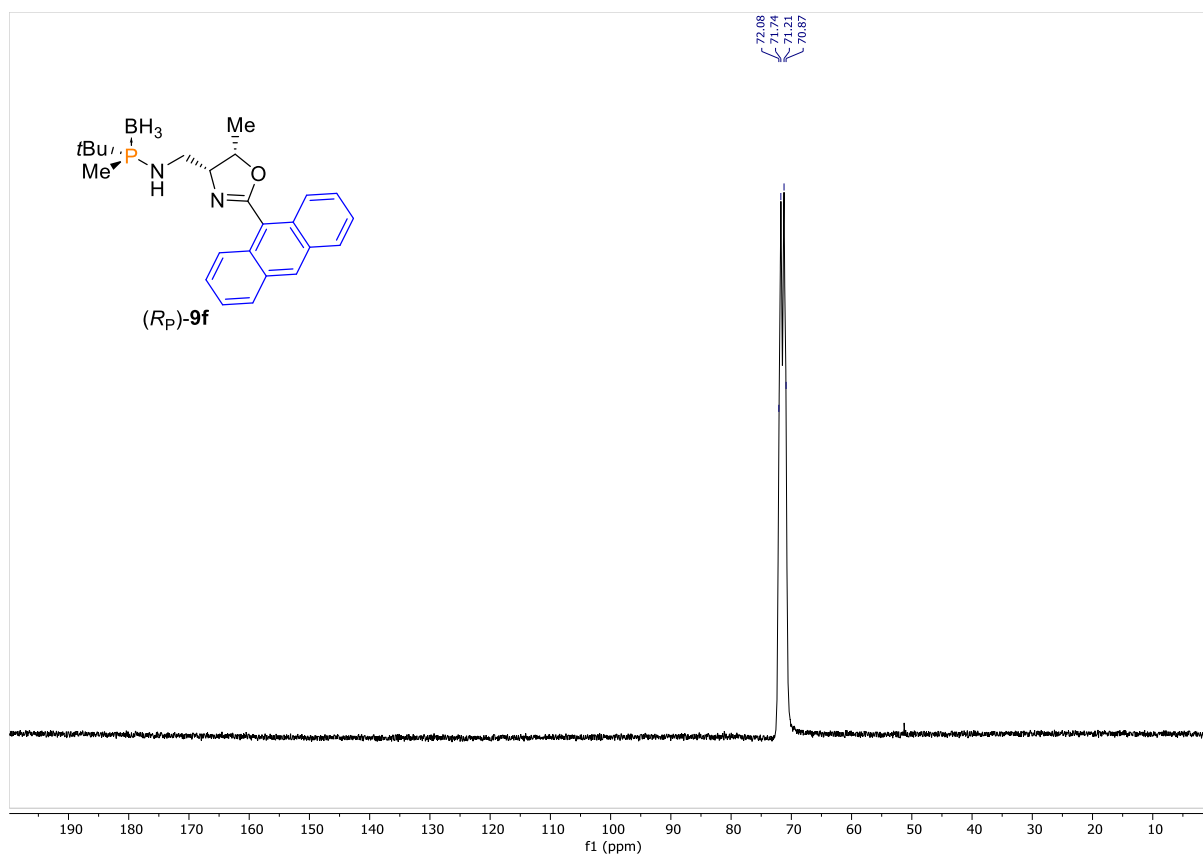

$^1\text{H}$ -NMR (400 MHz,  $\text{CDCl}_3$ ):

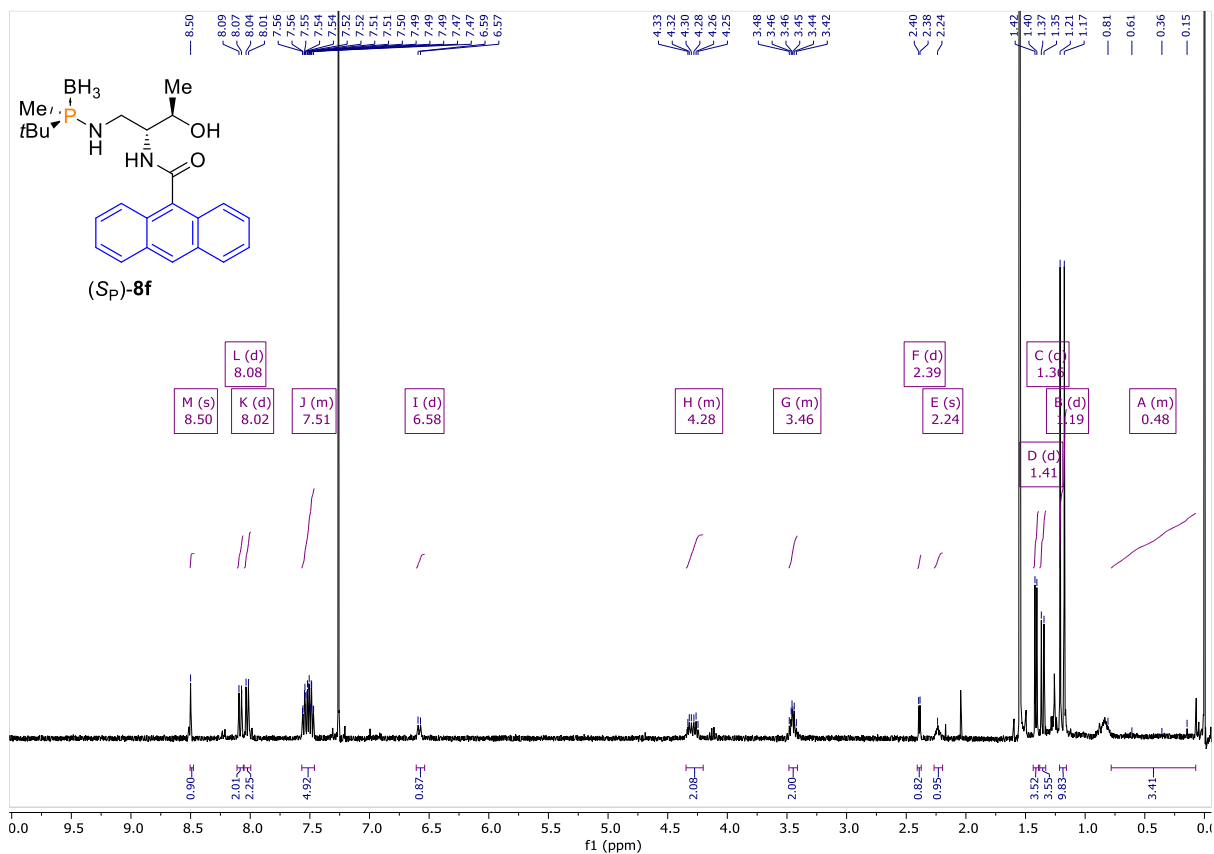

<sup>1</sup>H-NMR (400 MHz, CDCl<sub>3</sub>):

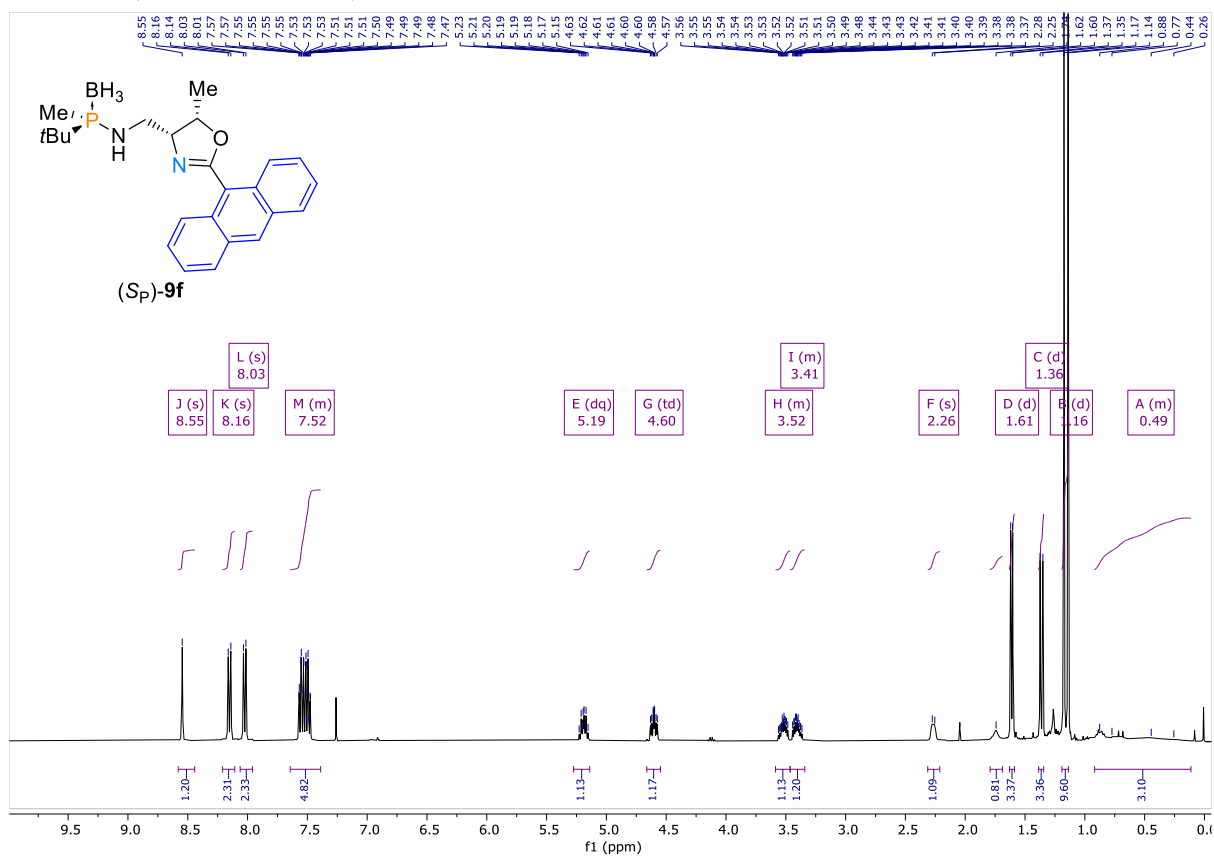

<sup>13</sup>C-NMR (101 MHz, CDCl<sub>3</sub>):

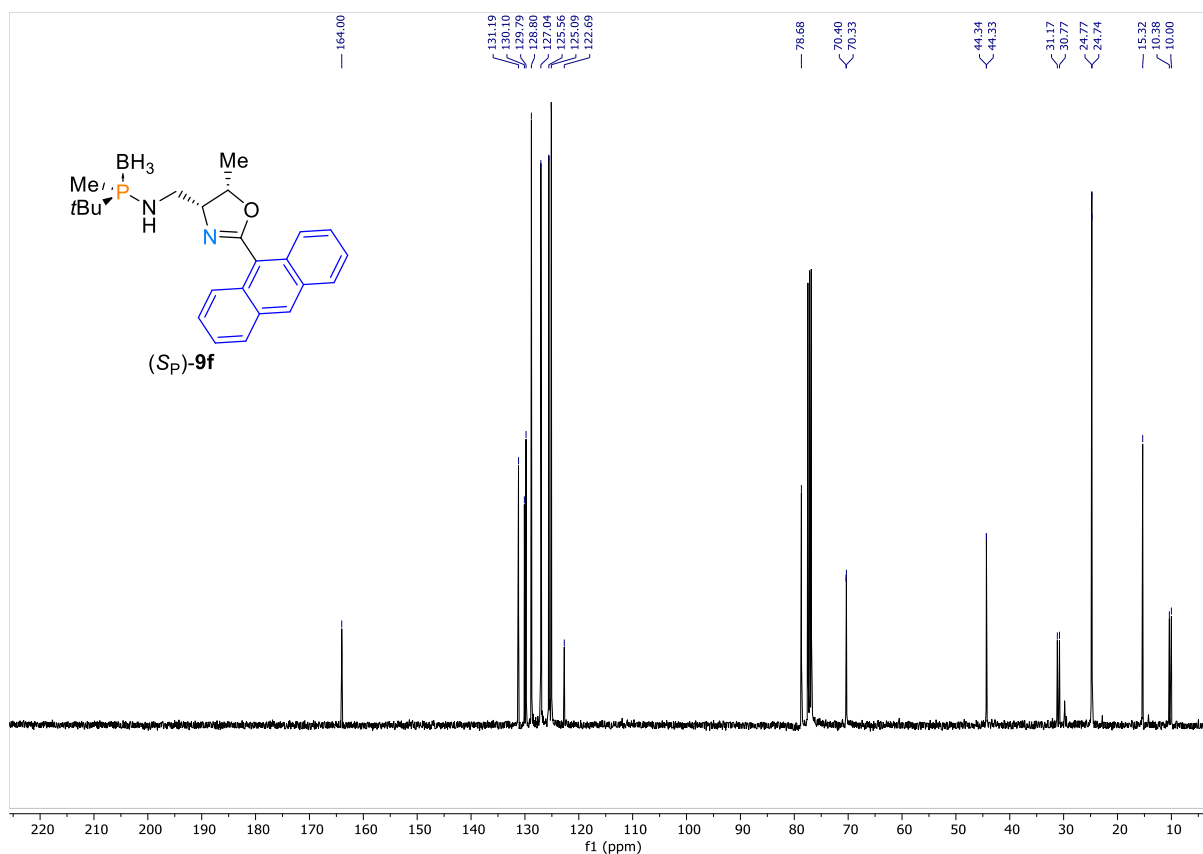

$^{31}\text{P}$ -NMR (162 MHz,  $\text{CDCl}_3$ ):

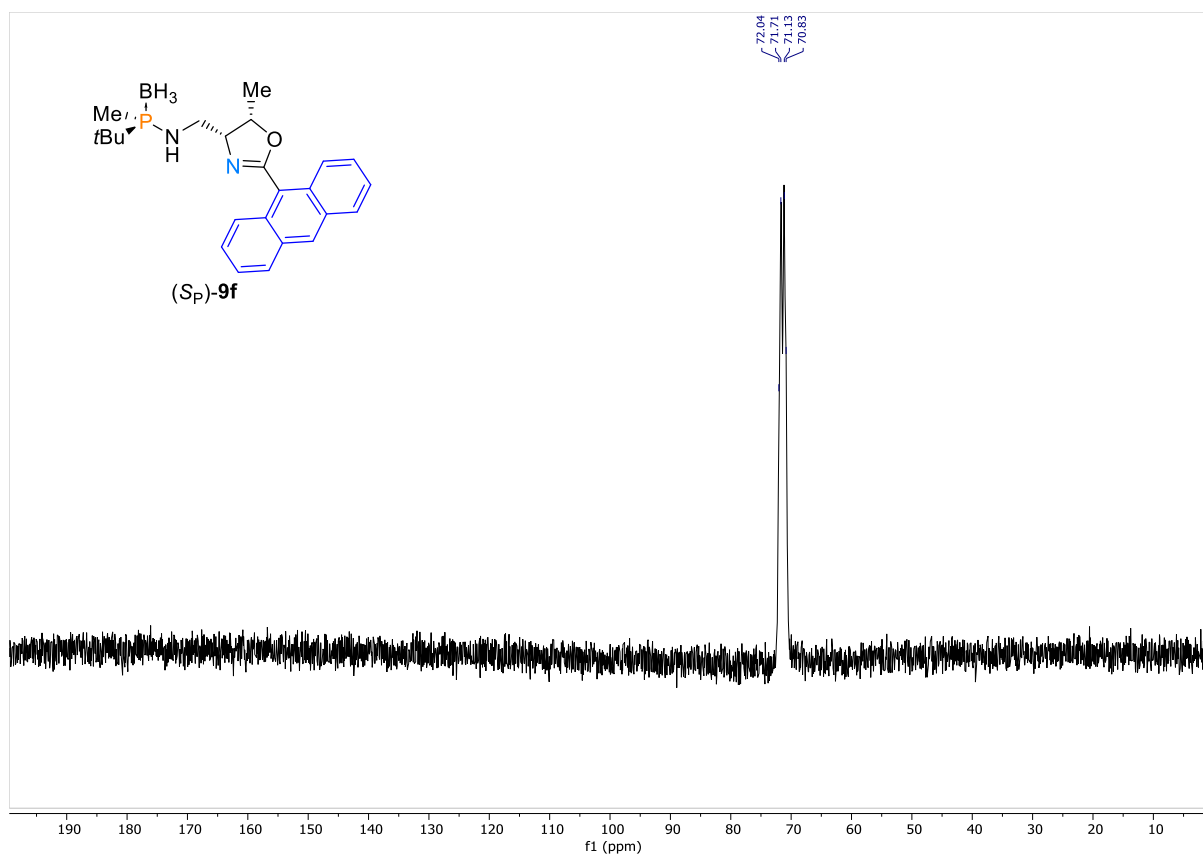

$^1\text{H}$ -NMR (400 MHz,  $\text{CDCl}_3$ ):

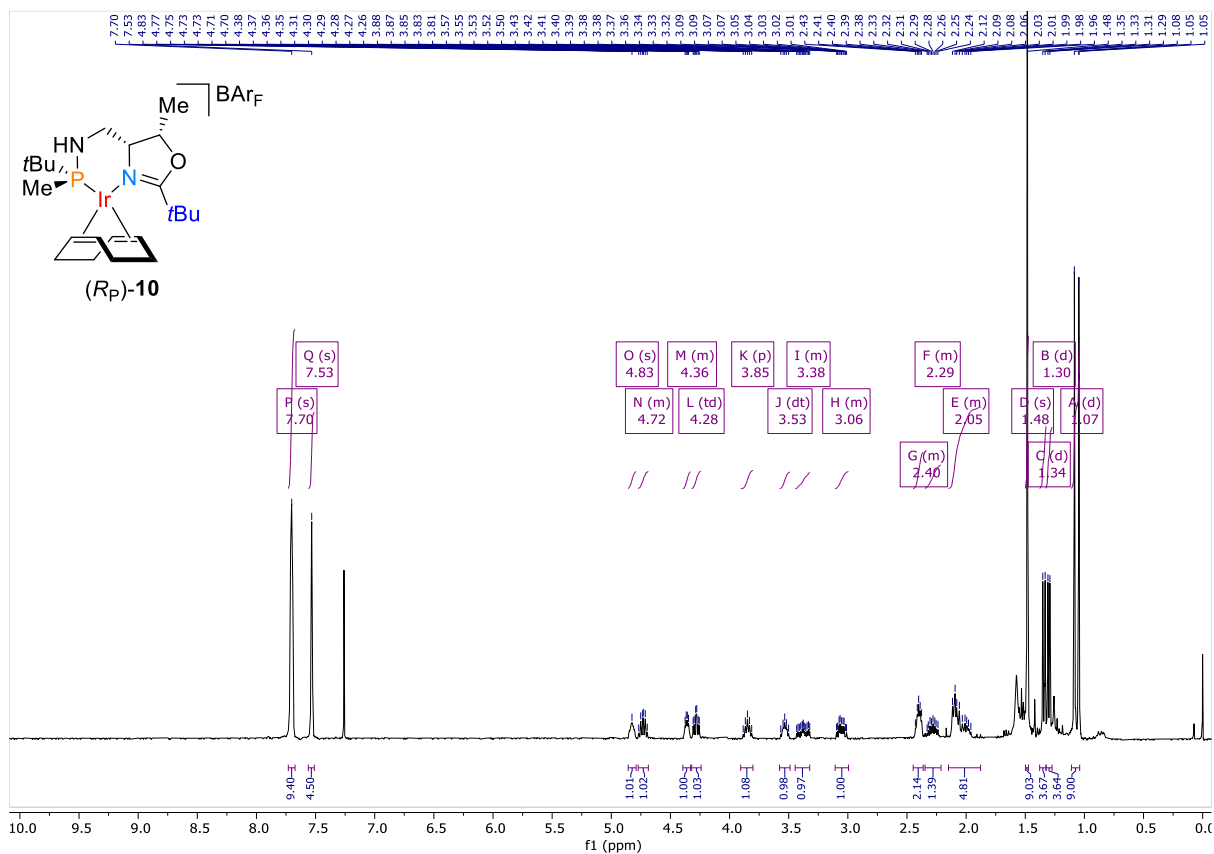



$^{13}\text{C}$ -NMR (101 MHz,  $\text{CDCl}_3$ ):

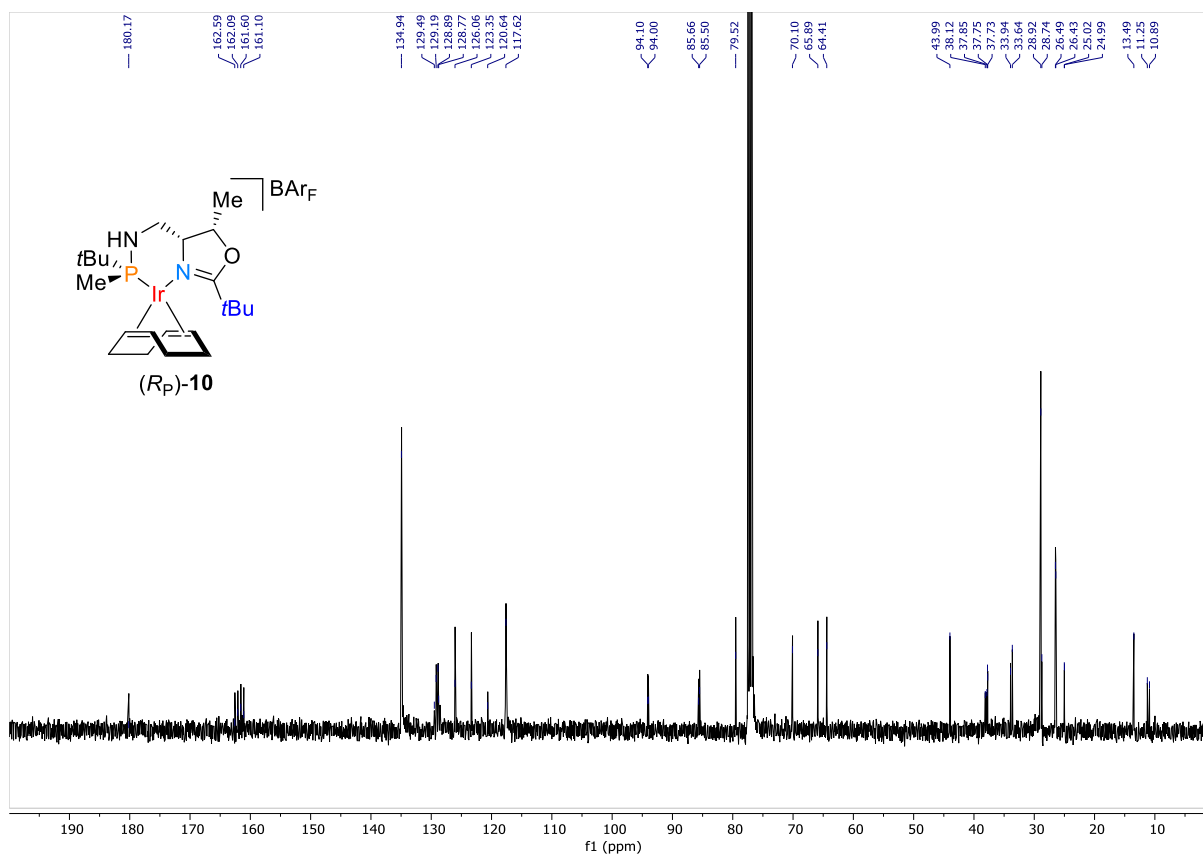

$^{31}\text{P}$ -NMR (162 MHz,  $\text{CDCl}_3$ ):

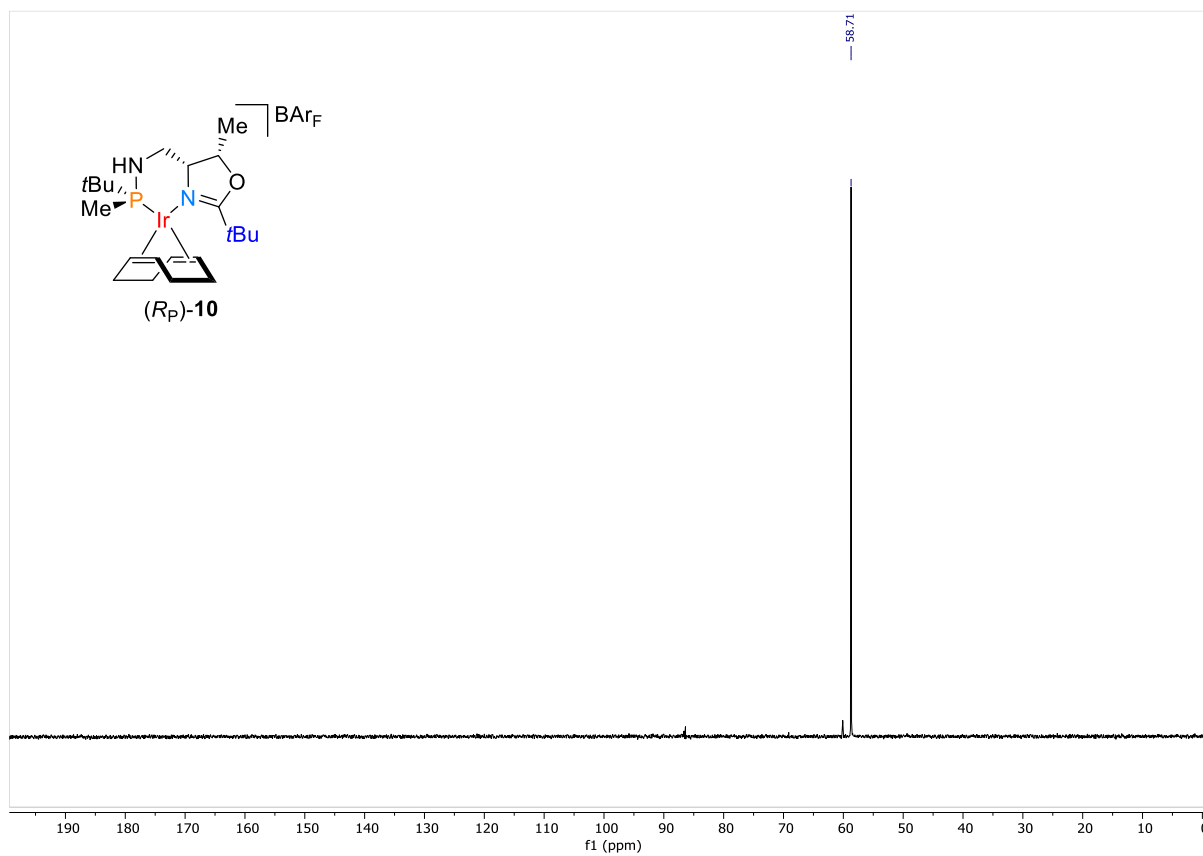

$^1\text{H-NMR}$  (400 MHz,  $\text{CDCl}_3$ ):

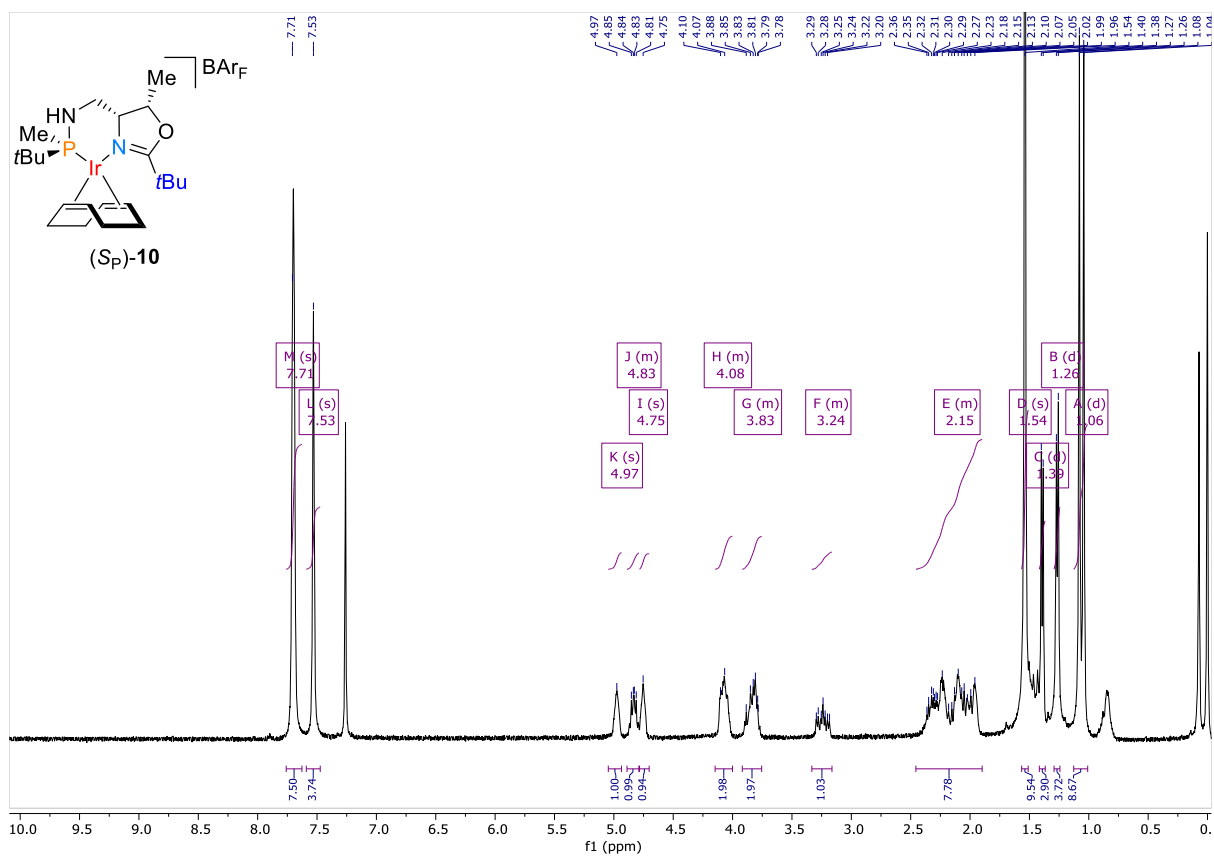

$^{13}\text{C-NMR}$  (101 MHz,  $\text{CDCl}_3$ ):

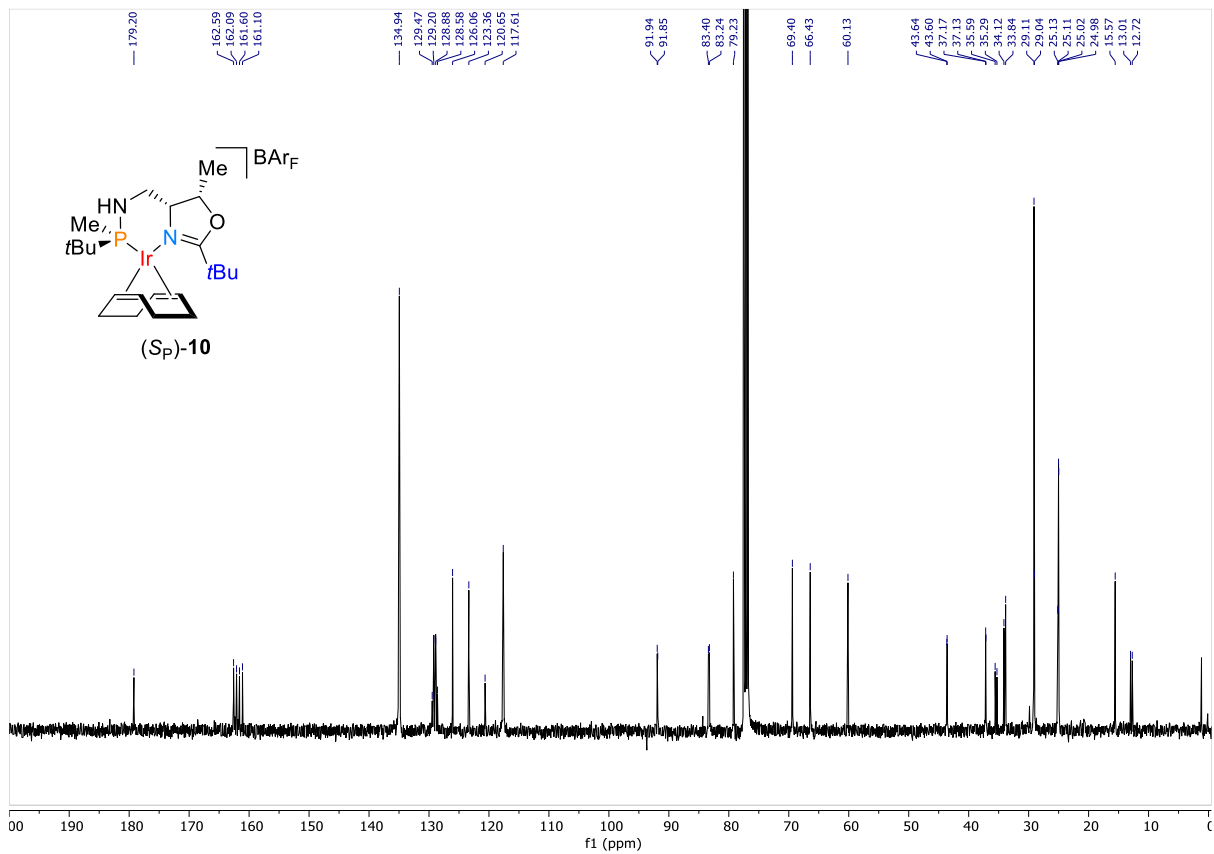

$^{31}\text{P}$ -NMR (162 MHz,  $\text{CDCl}_3$ ):

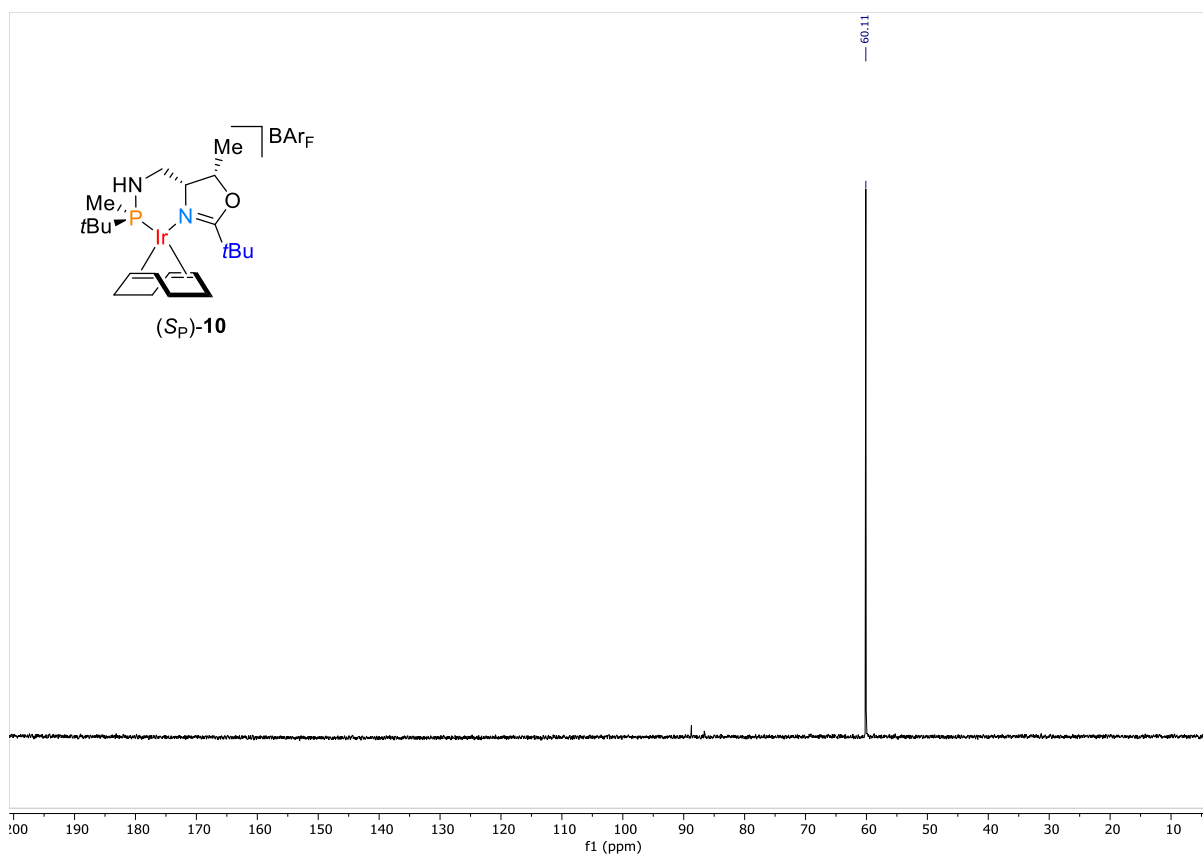

$^1\text{H}$ -NMR (400 MHz,  $\text{CDCl}_3$ ):

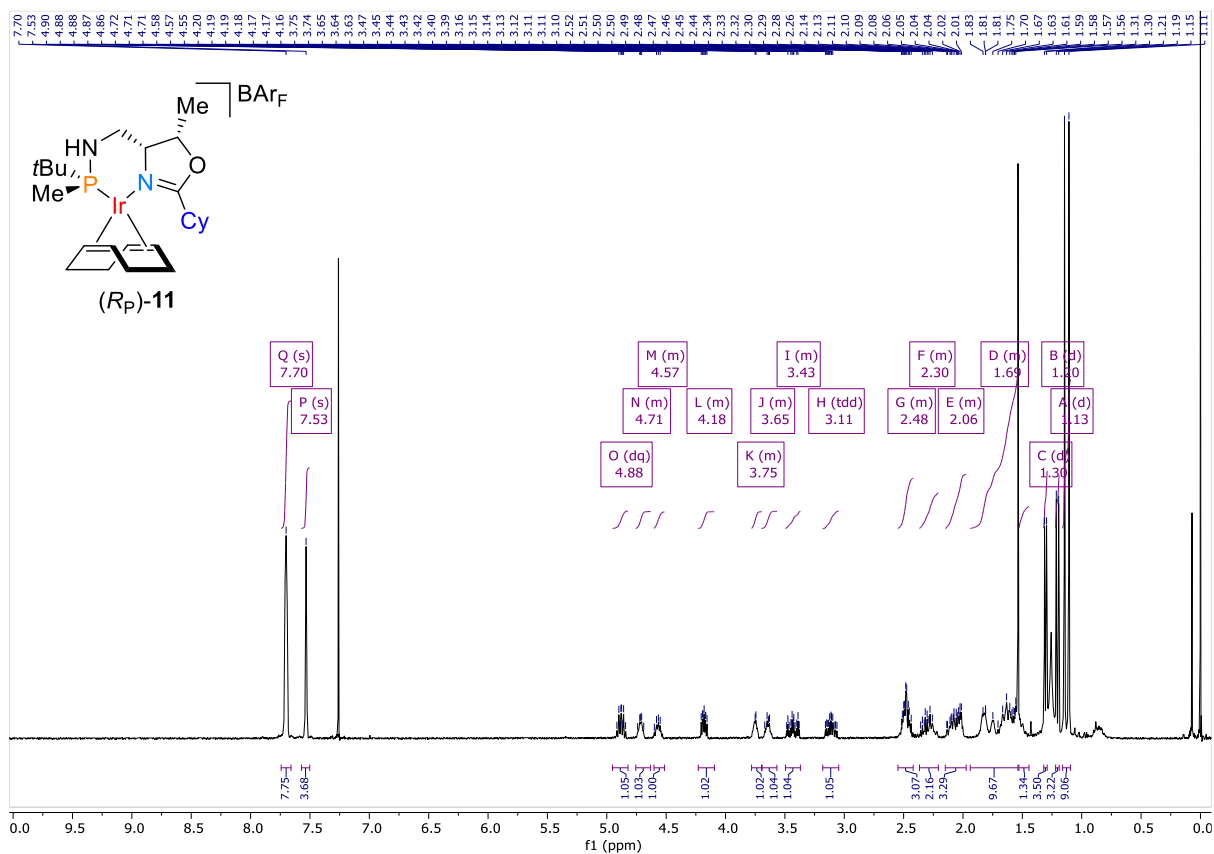

$^{13}\text{C}$ -NMR (101 MHz,  $\text{CDCl}_3$ ):

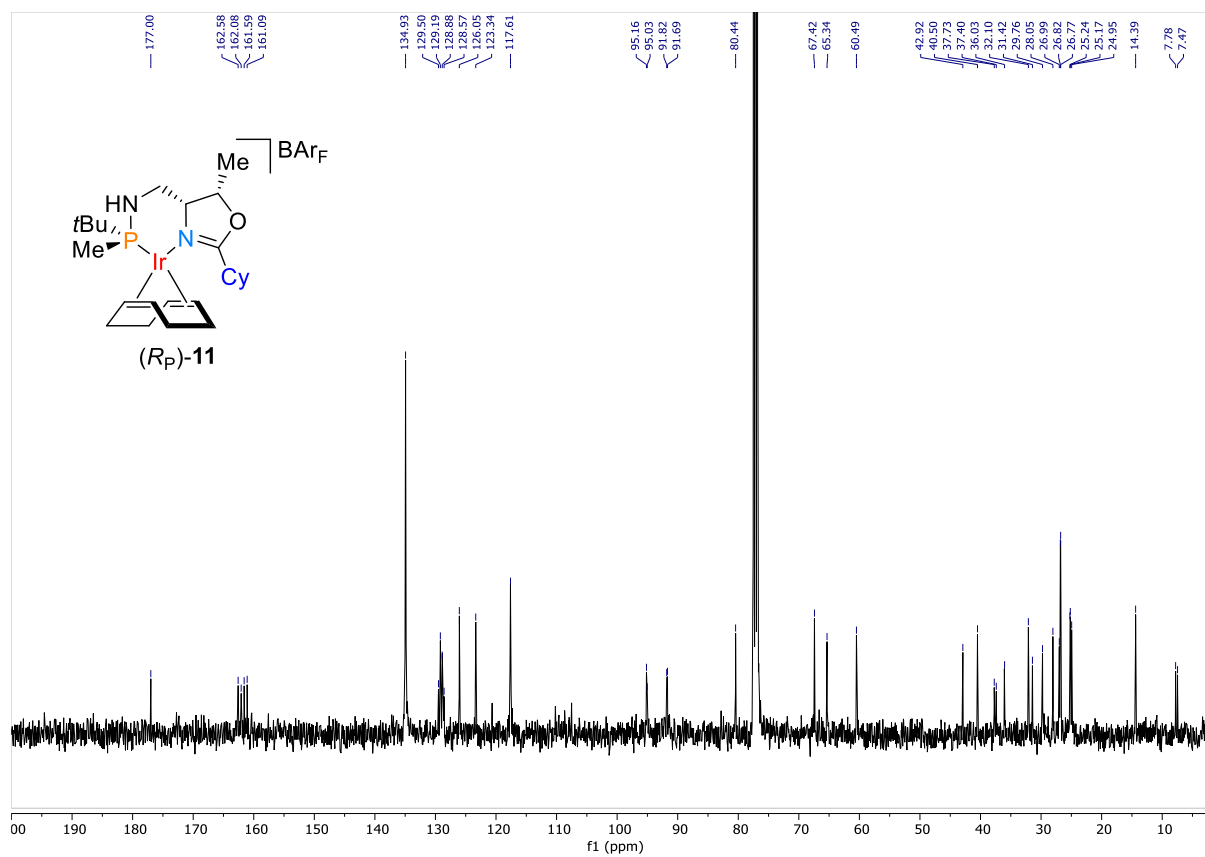

$^{31}\text{P}$ -NMR (162 MHz,  $\text{CDCl}_3$ ):

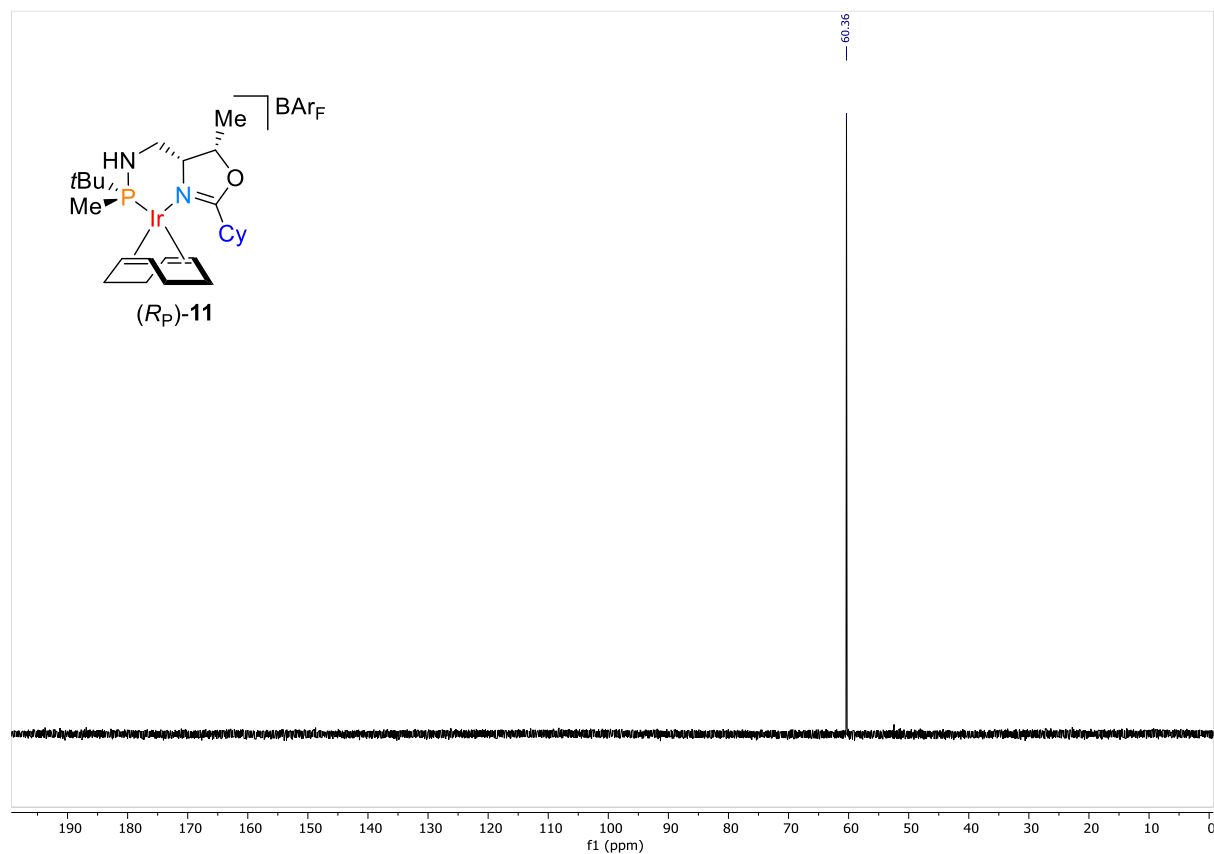

$^1\text{H-NMR}$  (400 MHz,  $\text{CDCl}_3$ ):

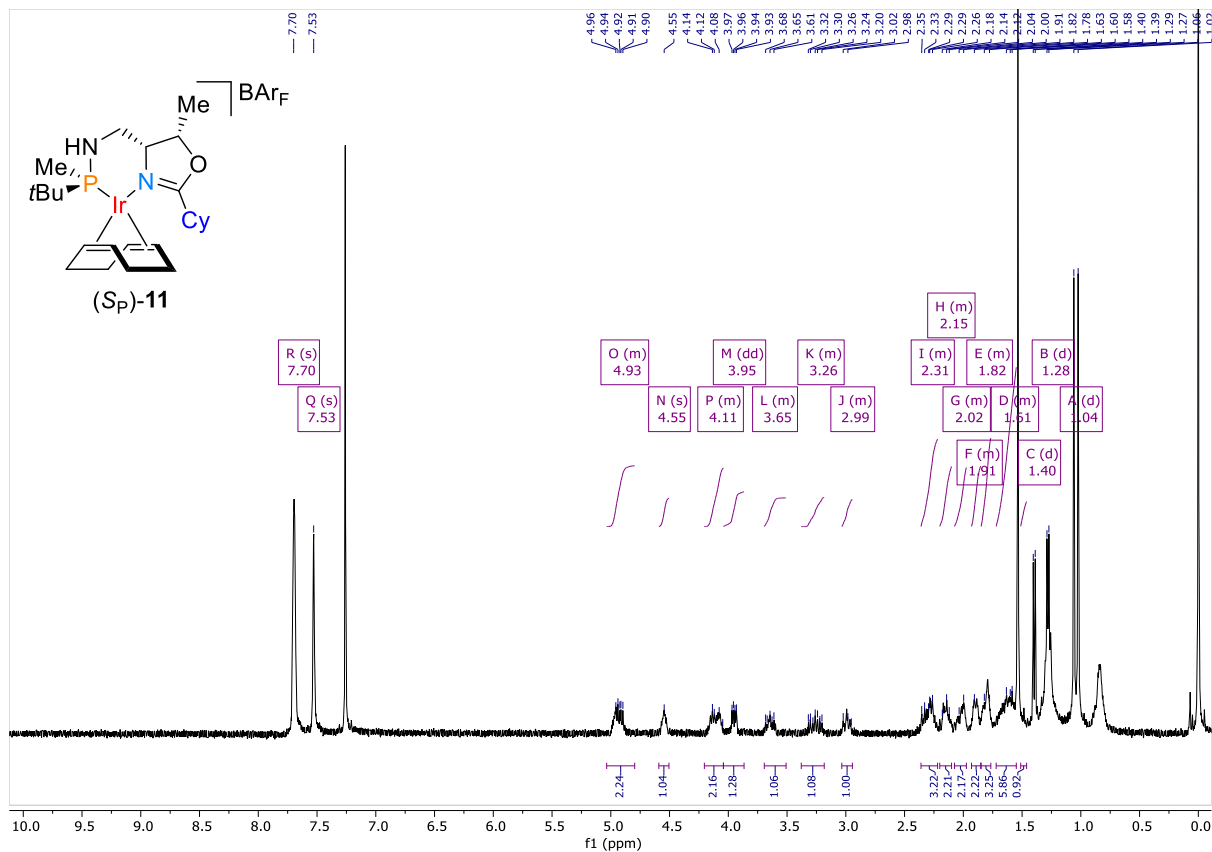

$^{13}\text{C-NMR}$  (101 MHz,  $\text{CDCl}_3$ ):

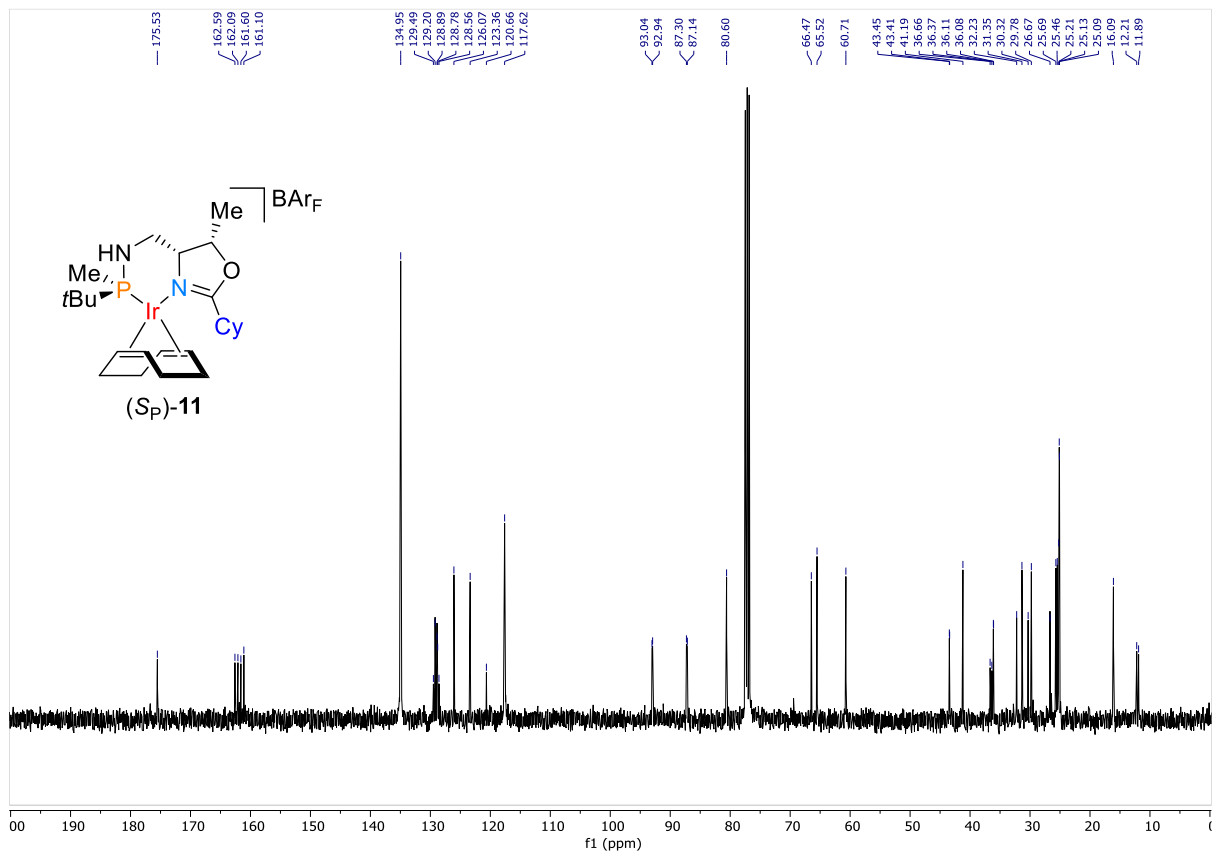

$^{31}\text{P}$ -NMR (162 MHz,  $\text{CDCl}_3$ ):

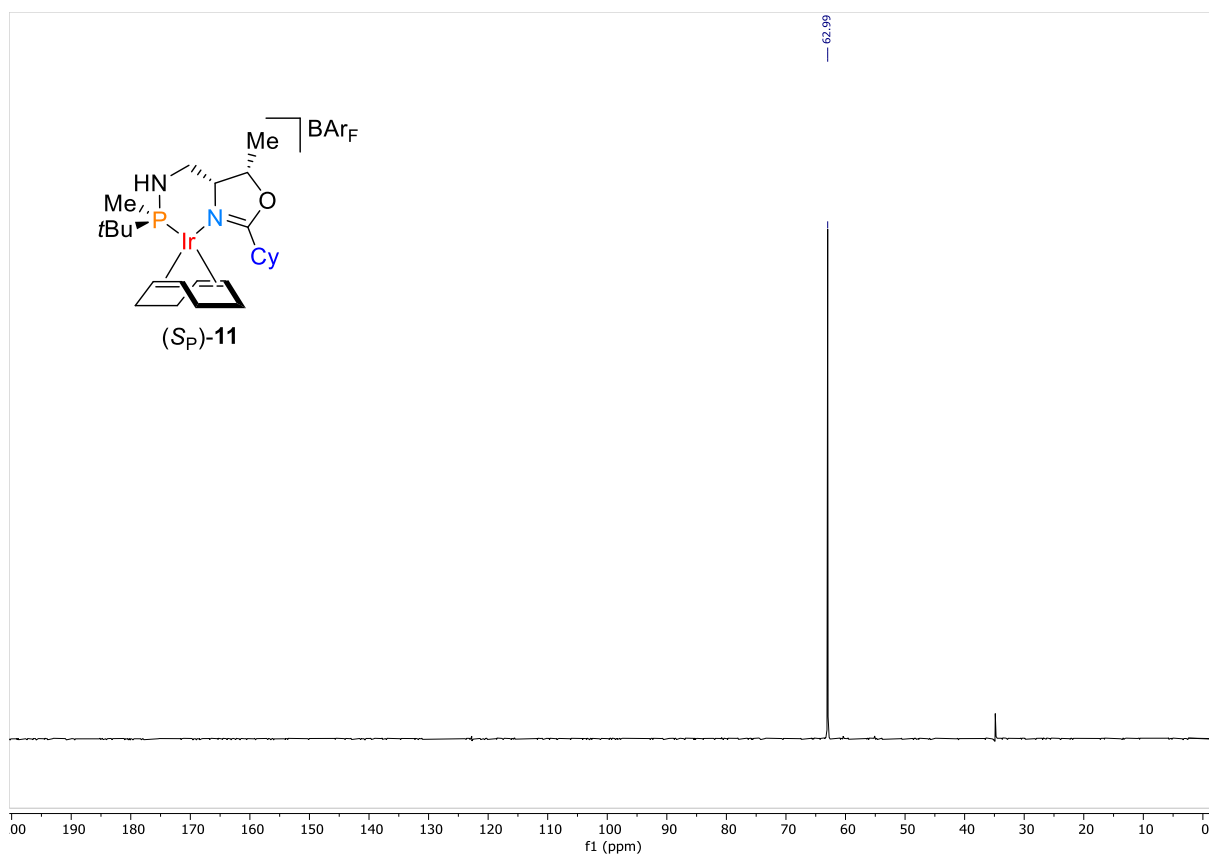

$^1\text{H}$ -NMR (400 MHz,  $\text{CDCl}_3$ ):

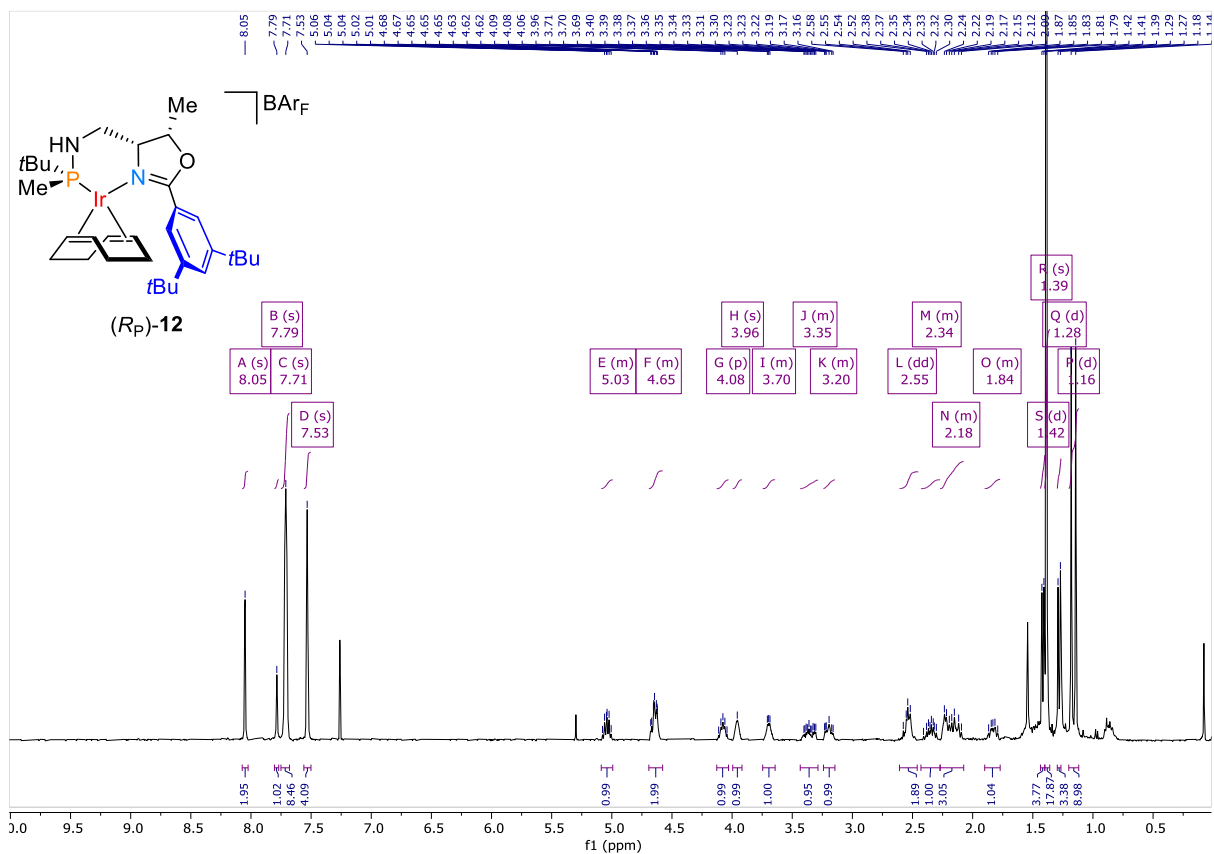

$^{13}\text{C}$ -NMR (101 MHz,  $\text{CDCl}_3$ ):

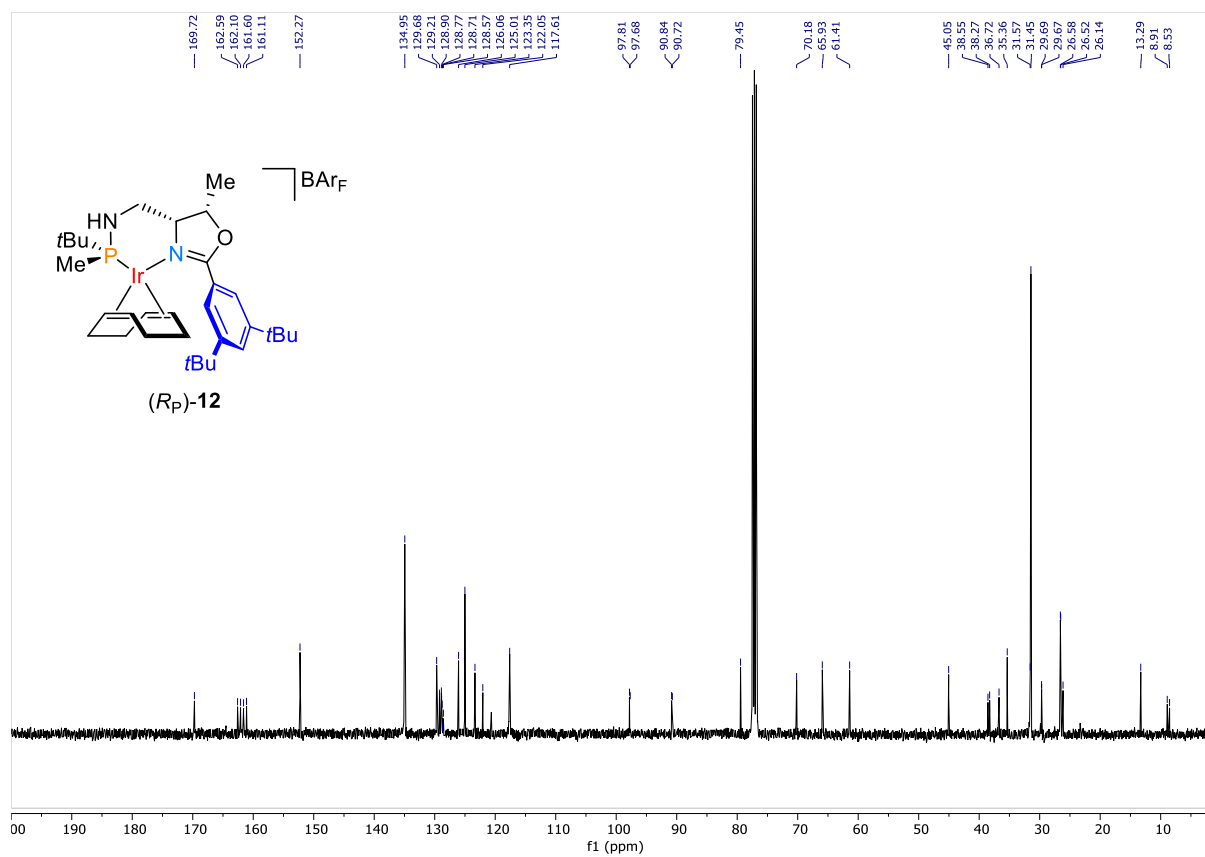

$^{31}\text{P}$ -NMR (162 MHz,  $\text{CDCl}_3$ ):

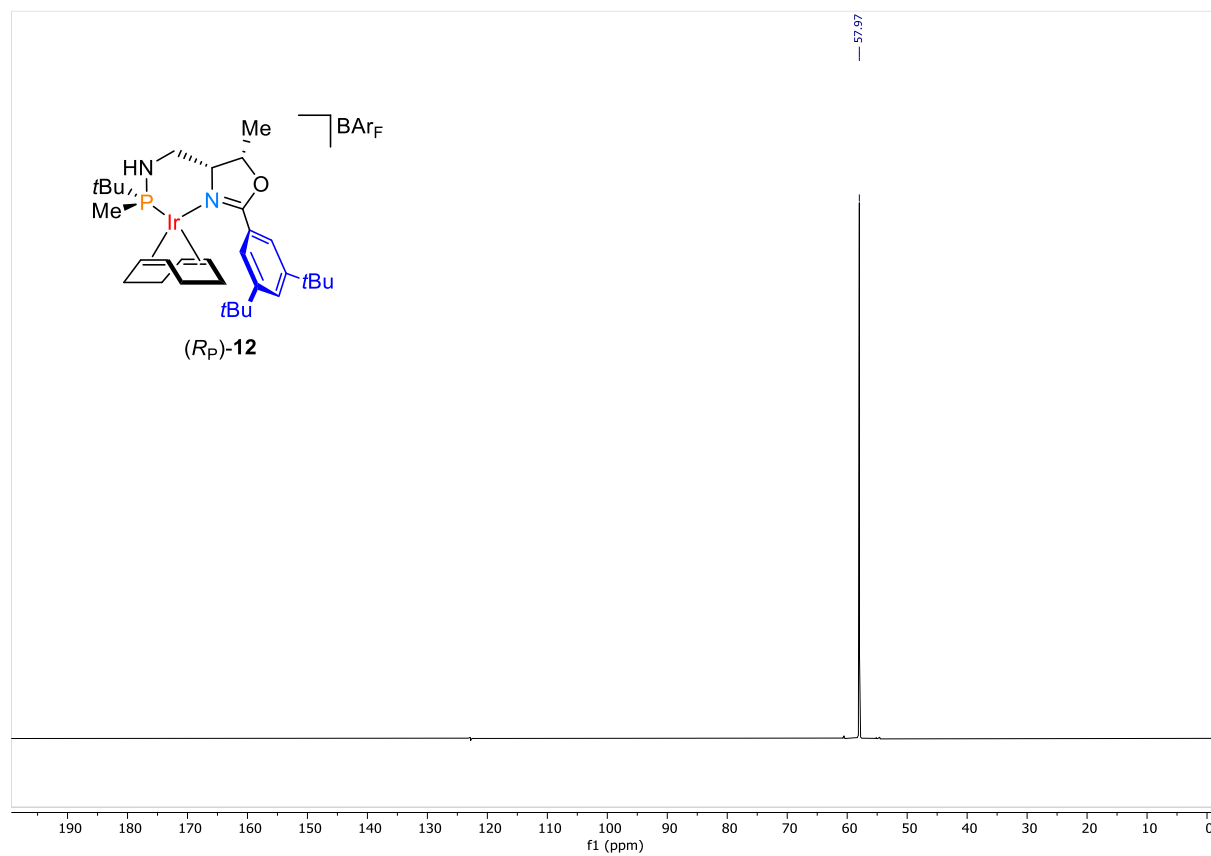

<sup>1</sup>H-NMR (400 MHz, CDCl<sub>3</sub>):

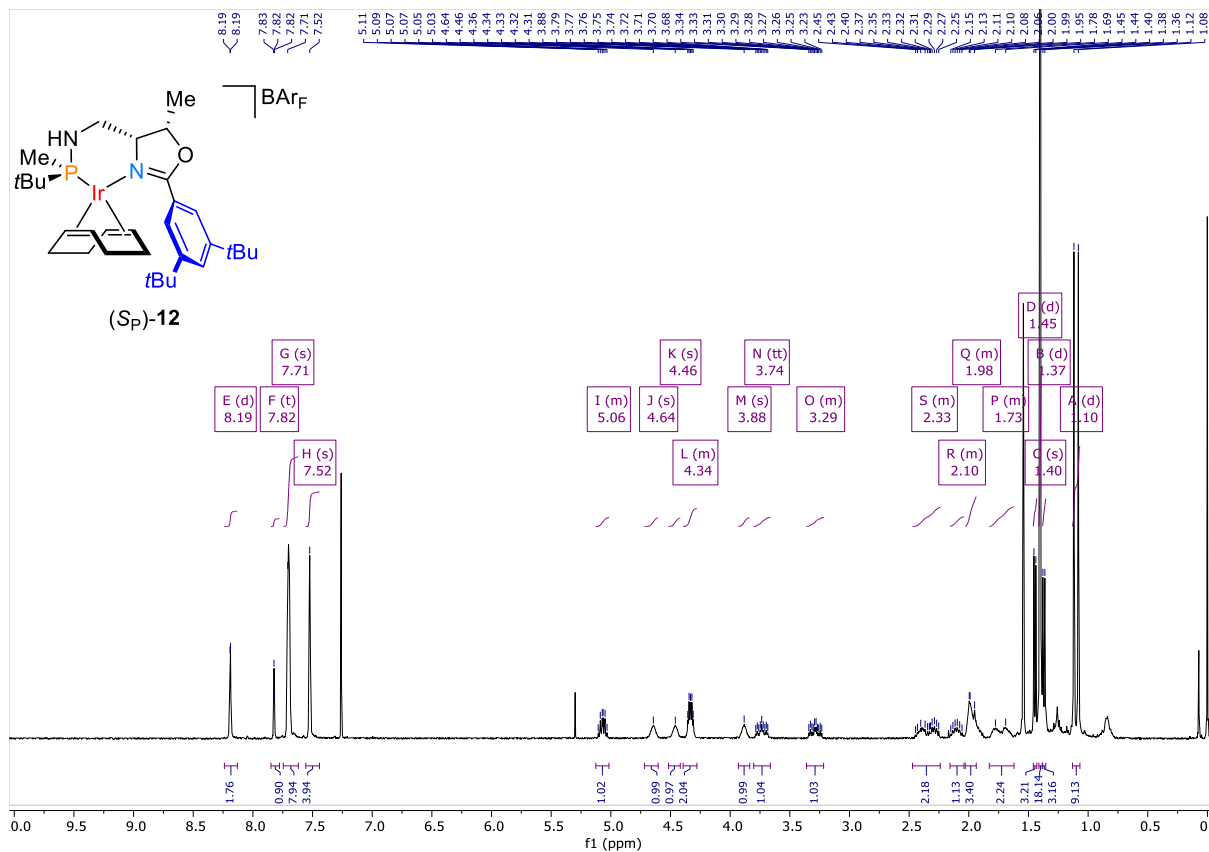

<sup>13</sup>C-NMR (101 MHz, CDCl<sub>3</sub>):

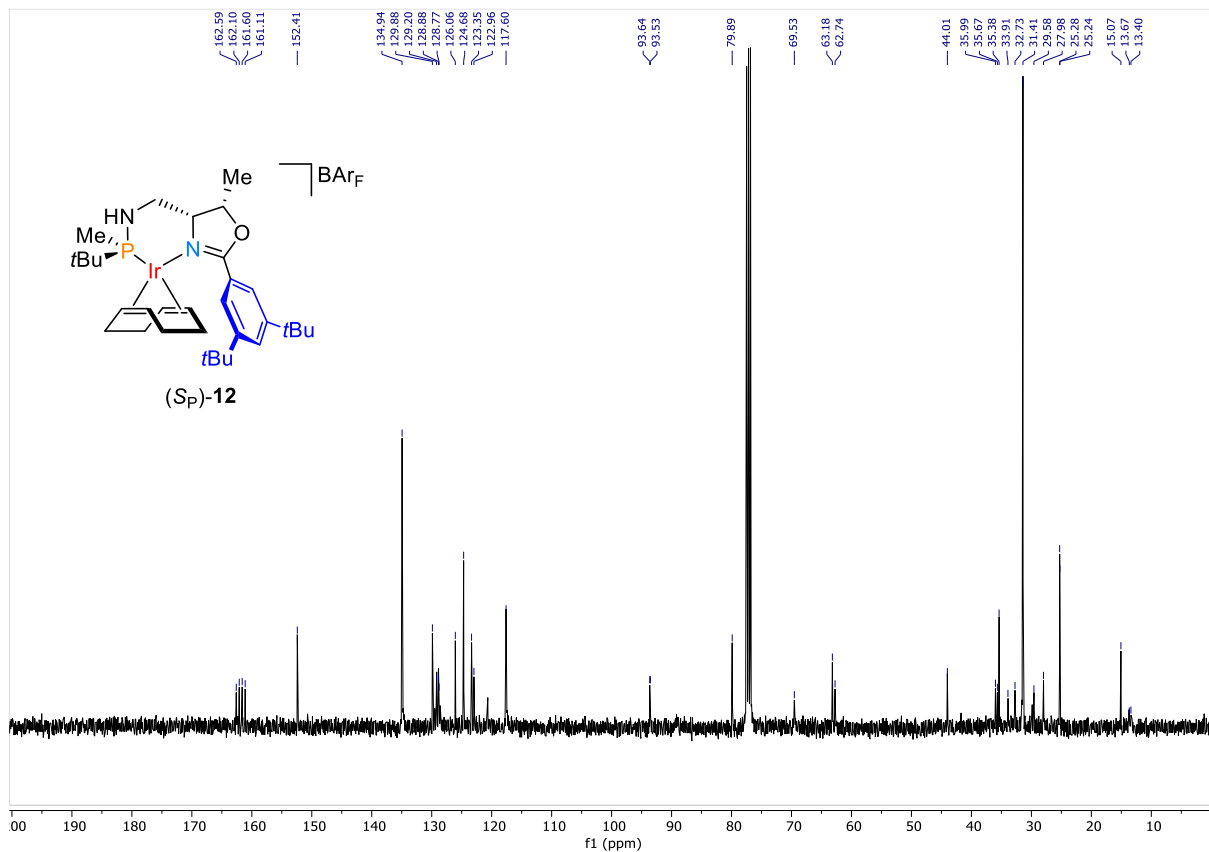



$^{31}\text{P}$ -NMR (162 MHz,  $\text{CDCl}_3$ ):

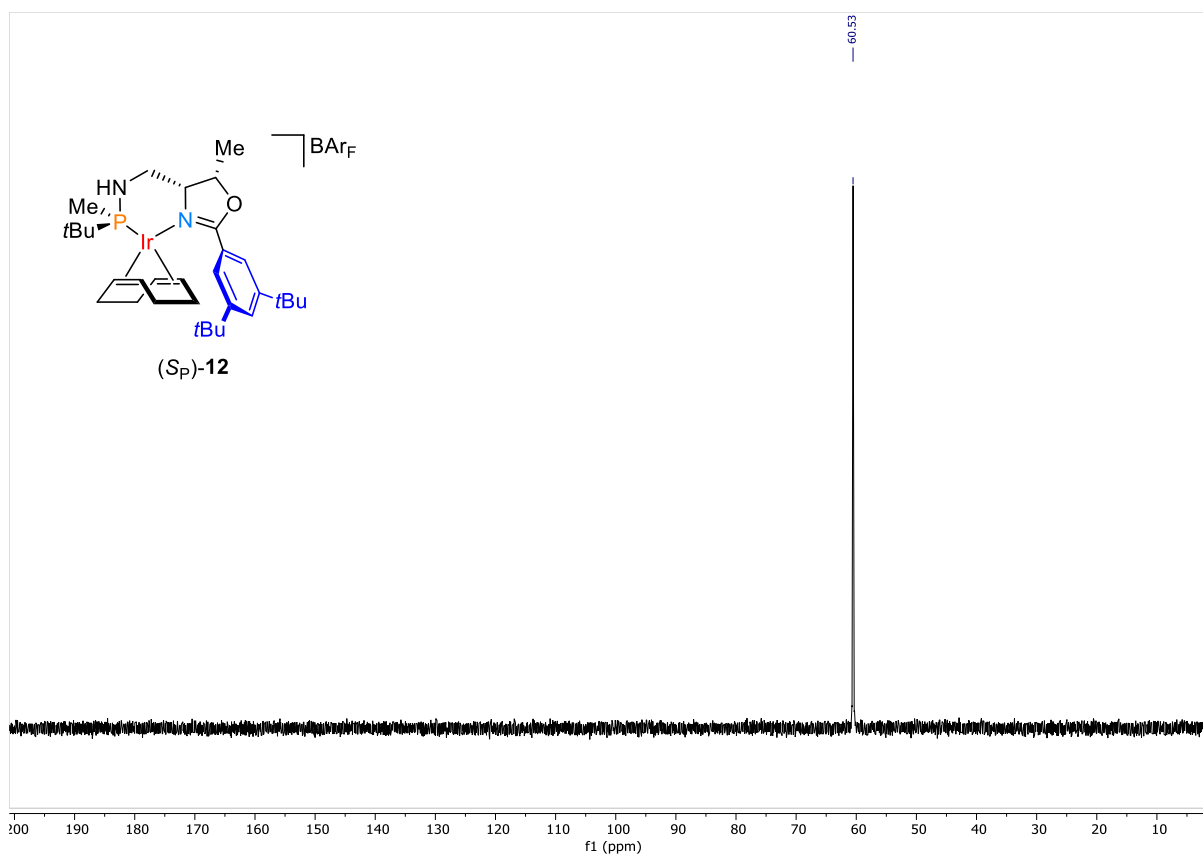

$^1\text{H}$ -NMR (400 MHz,  $\text{CDCl}_3$ ):

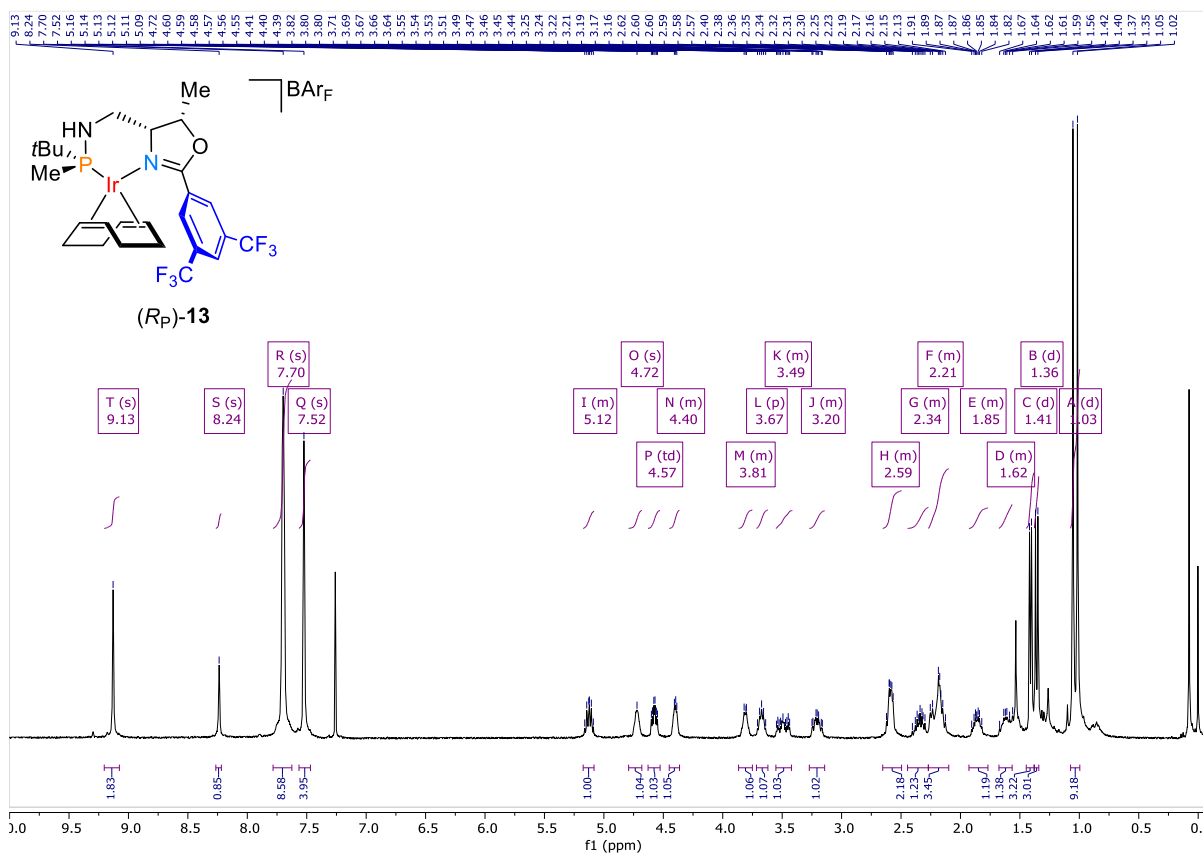

$^{13}\text{C}$ -NMR (101 MHz,  $\text{CDCl}_3$ ):

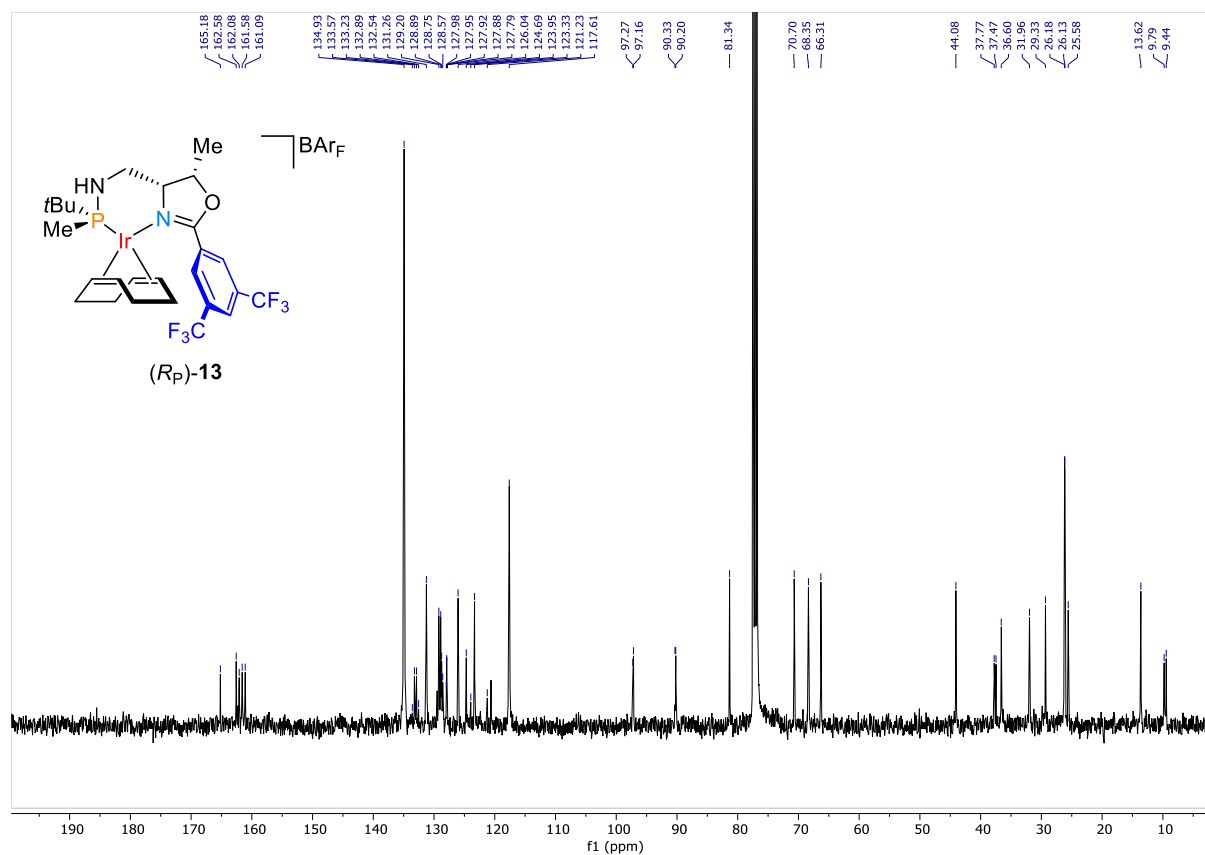

$^{31}\text{P}$ -NMR (162 MHz,  $\text{CDCl}_3$ ):

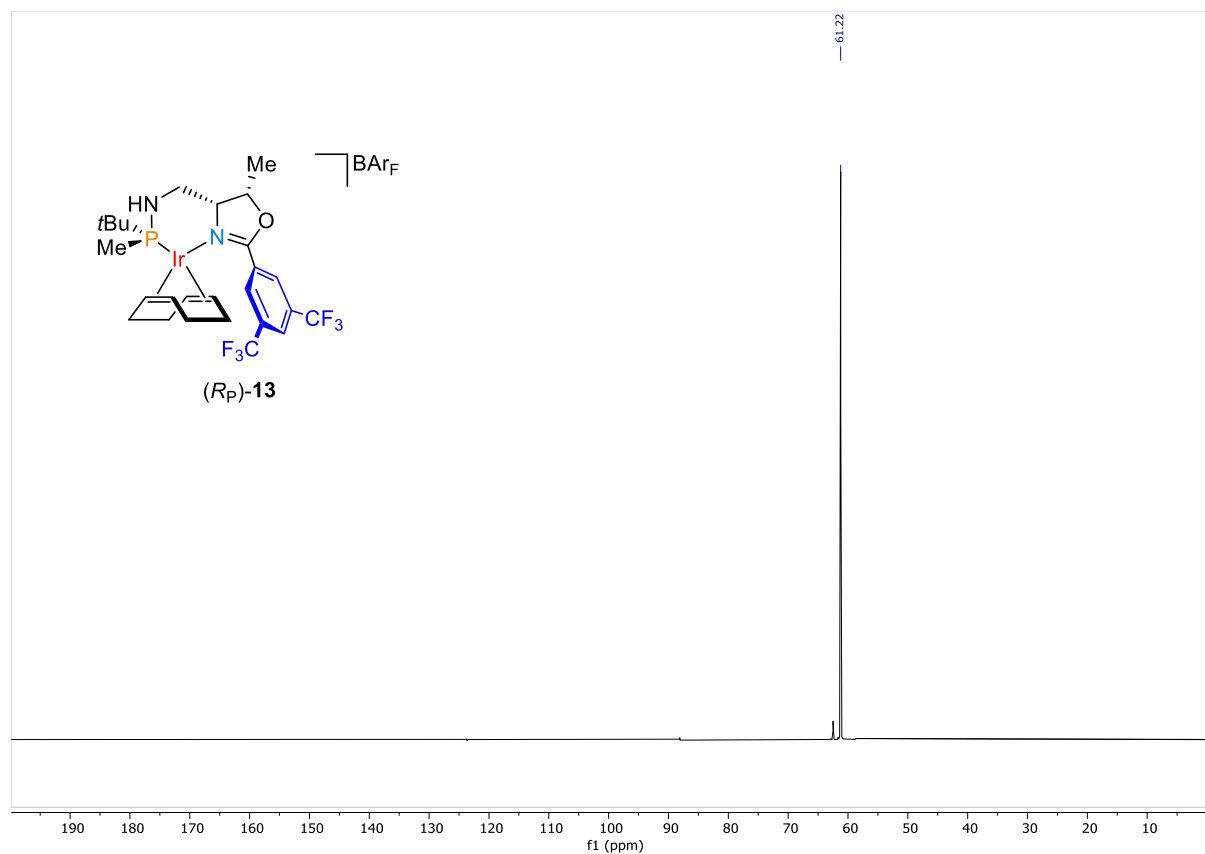

$^1\text{H-NMR}$  (400 MHz,  $\text{CDCl}_3$ ):

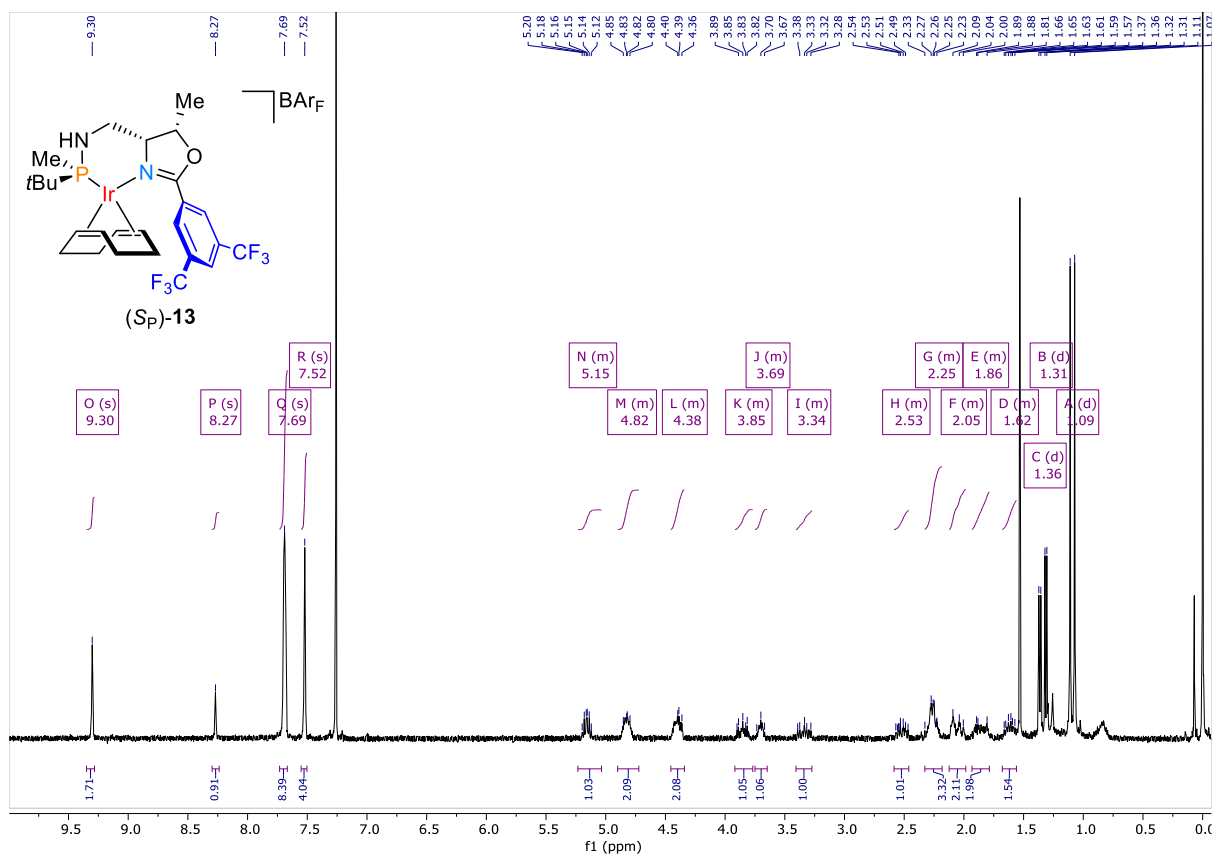

$^{13}\text{C-NMR}$  (101 MHz,  $\text{CDCl}_3$ ):

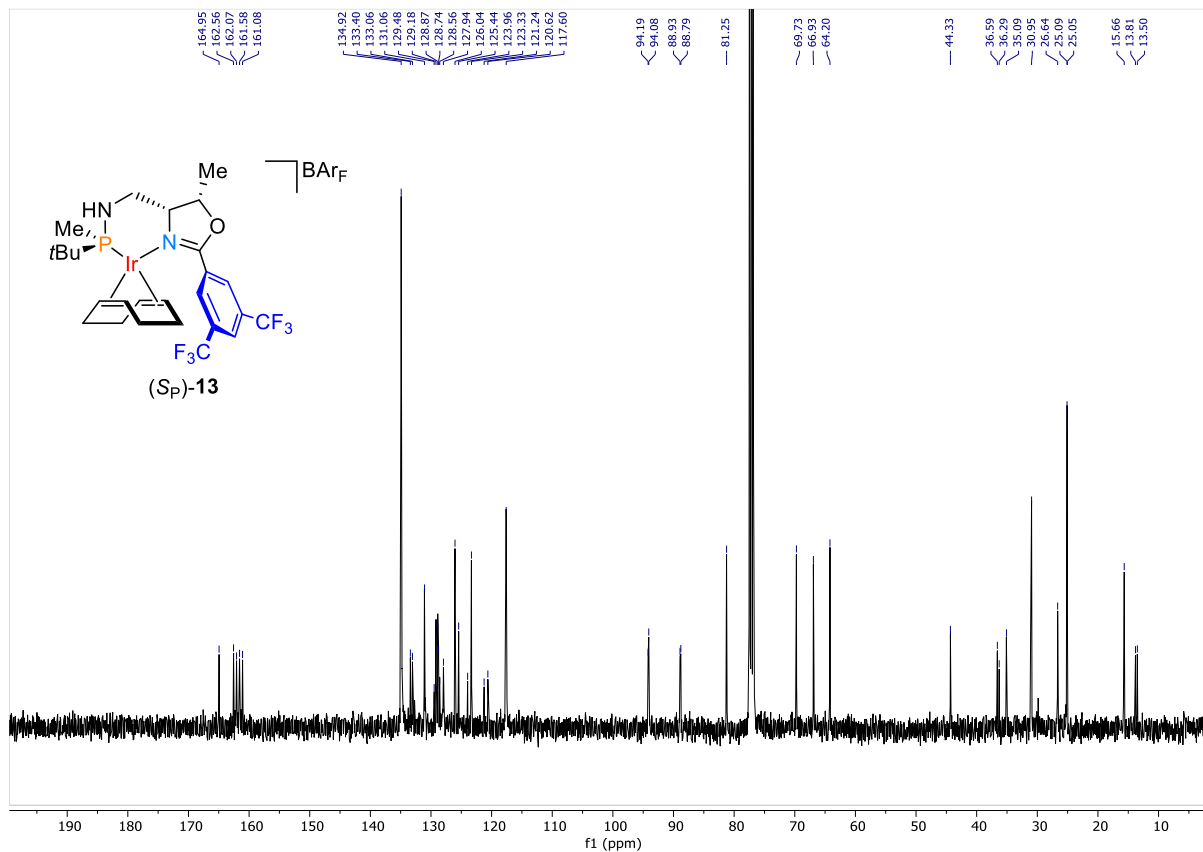

$^{31}\text{P}$ -NMR (162 MHz,  $\text{CDCl}_3$ ):

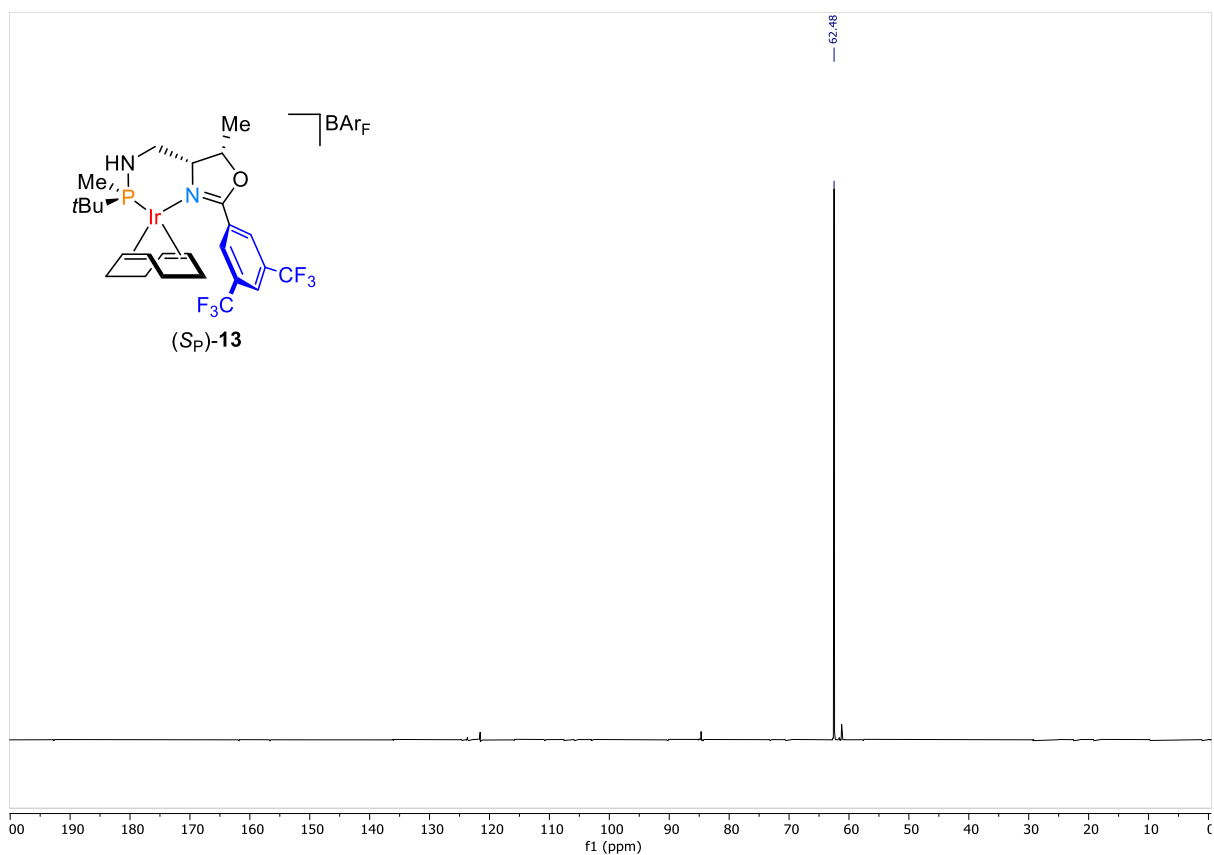

$^1\text{H}$ -NMR (400 MHz,  $\text{CDCl}_3$ ):

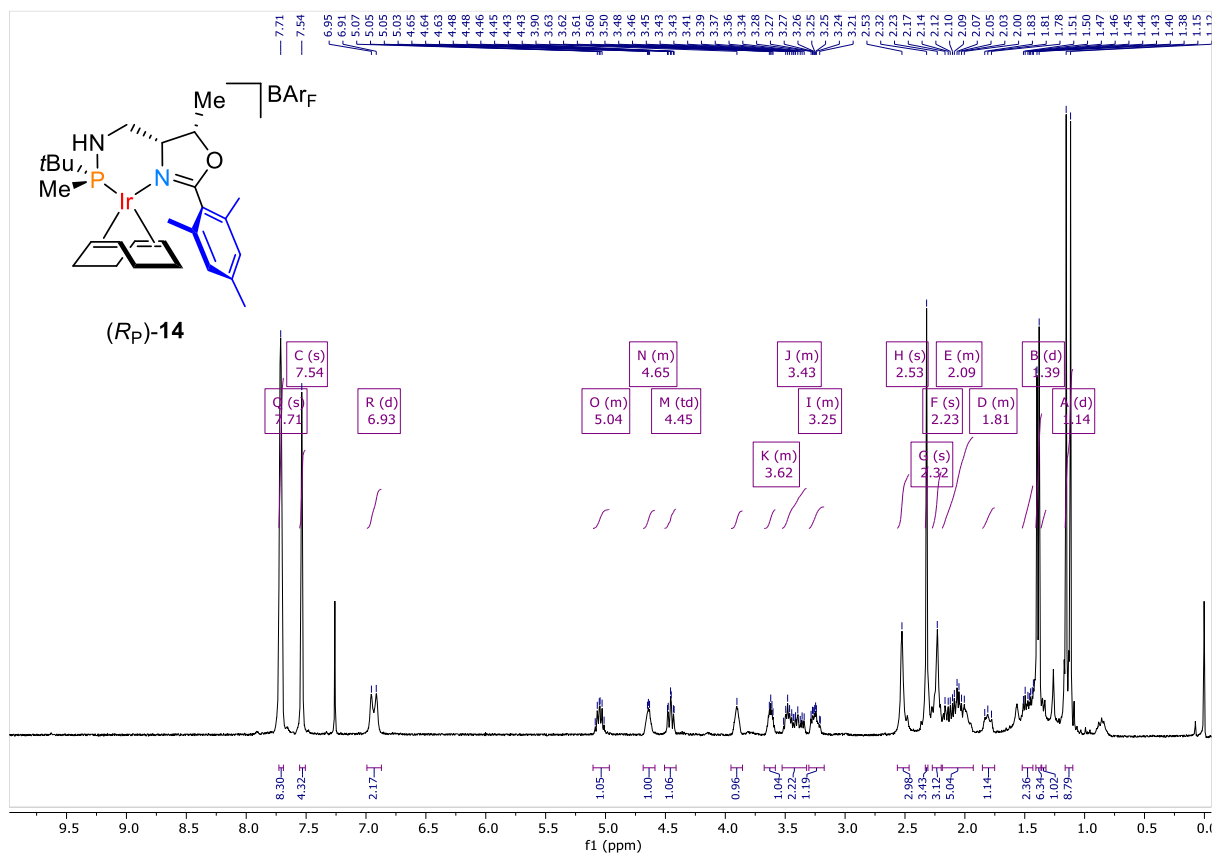

$^{13}\text{C}$ -NMR (101 MHz,  $\text{CDCl}_3$ ):

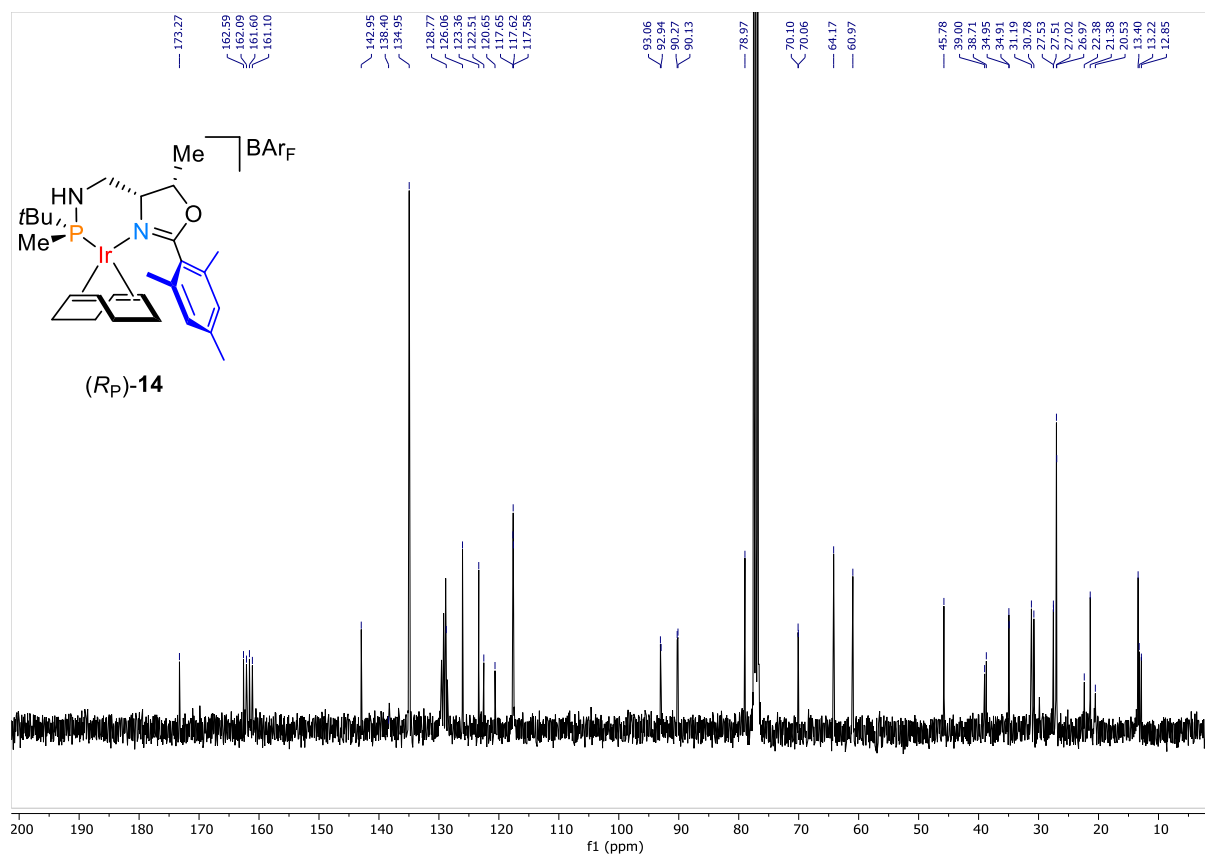

$^{31}\text{P}$ -NMR (162 MHz,  $\text{CDCl}_3$ ):

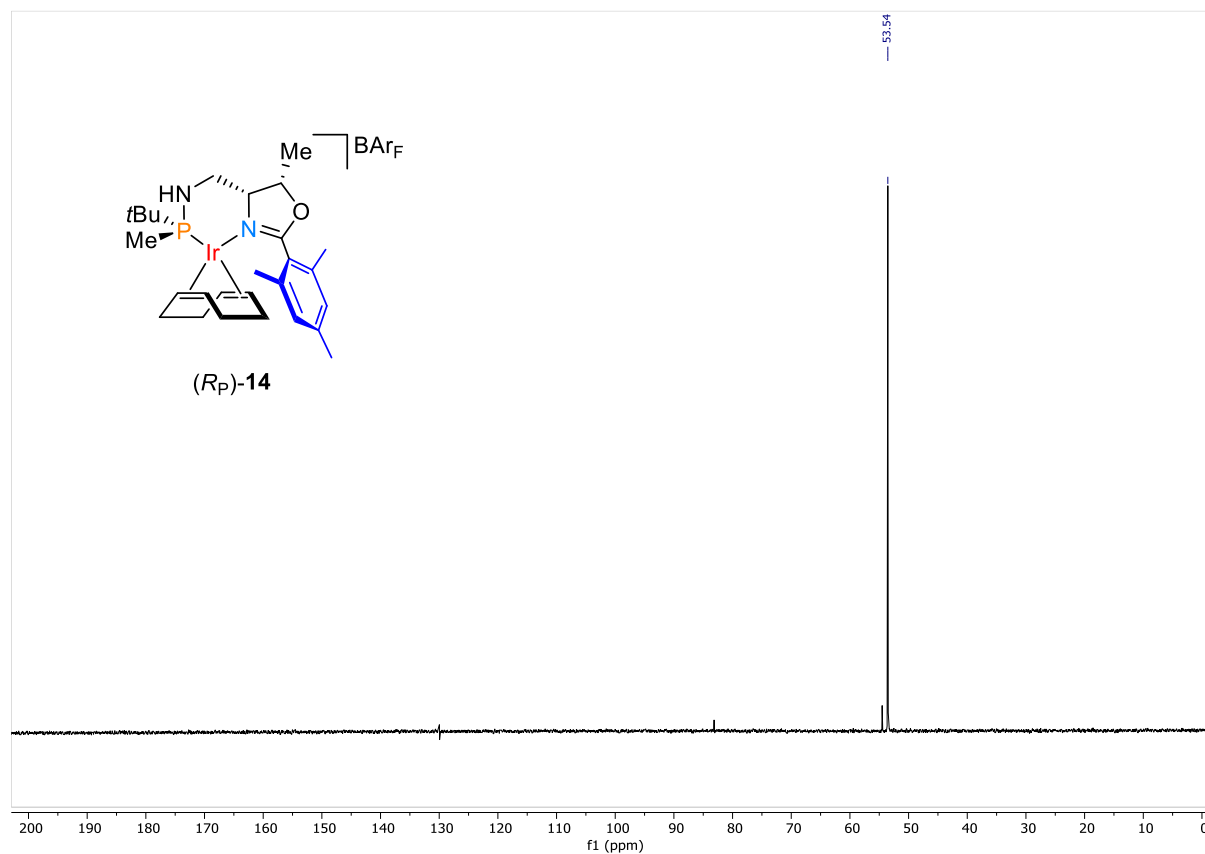

<sup>1</sup>H-NMR (400 MHz, CDCl<sub>3</sub>):

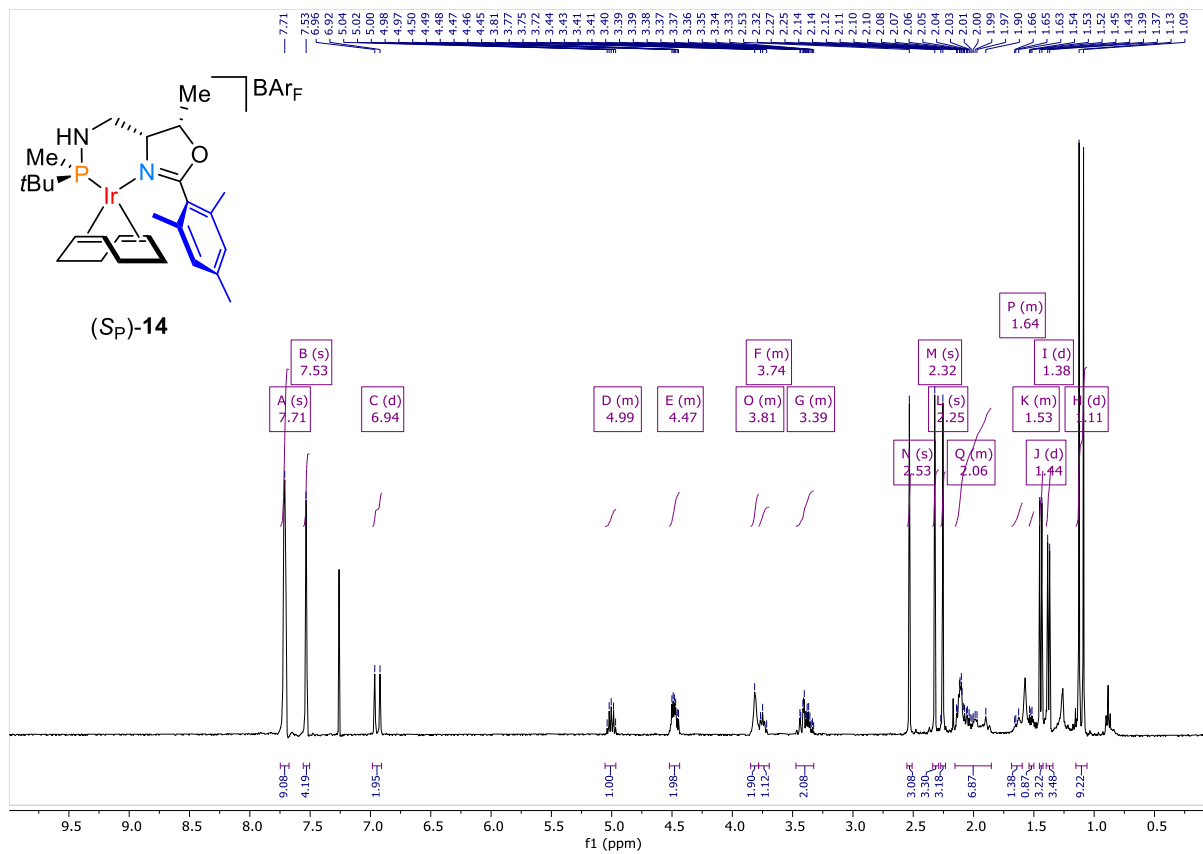

<sup>13</sup>C-NMR (101 MHz, CDCl<sub>3</sub>):

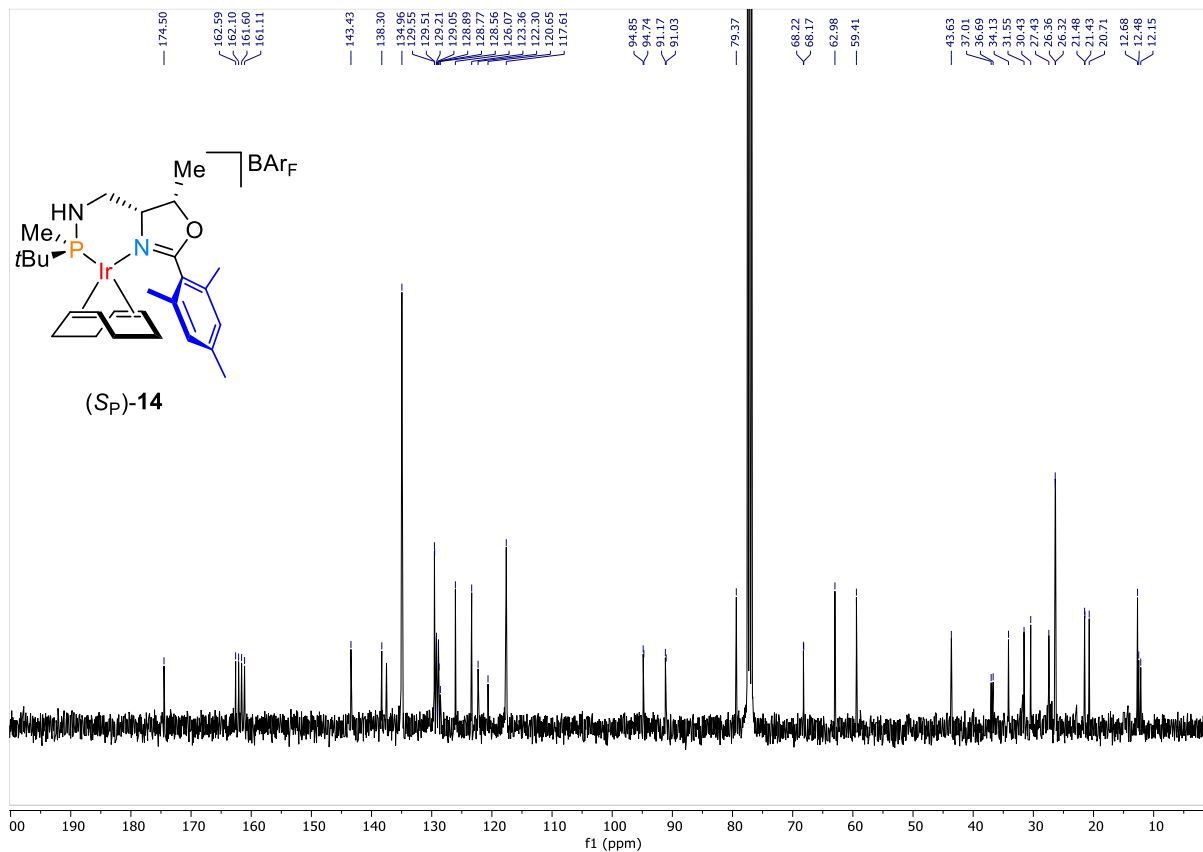

$^{31}\text{P}$ -NMR (162 MHz,  $\text{CDCl}_3$ ):

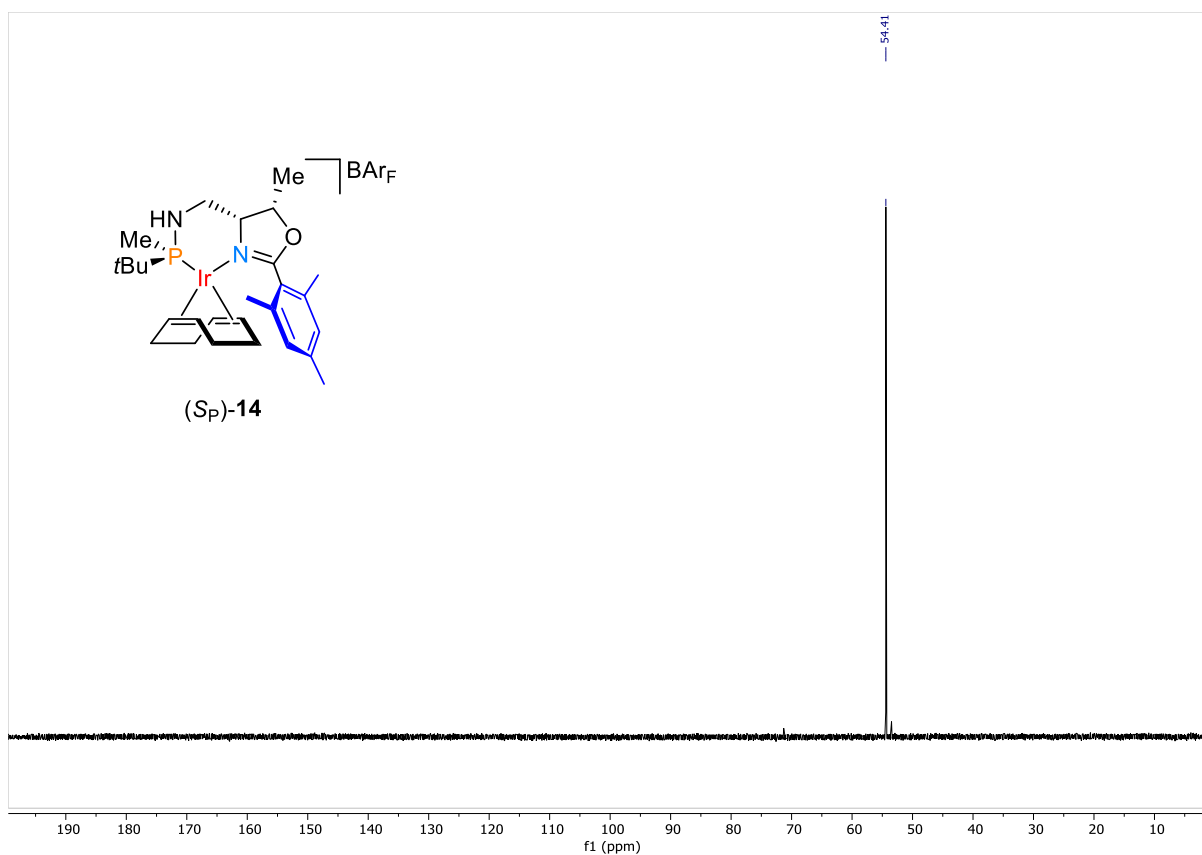

$^1\text{H}$ -NMR (400 MHz,  $\text{CDCl}_3$ ):

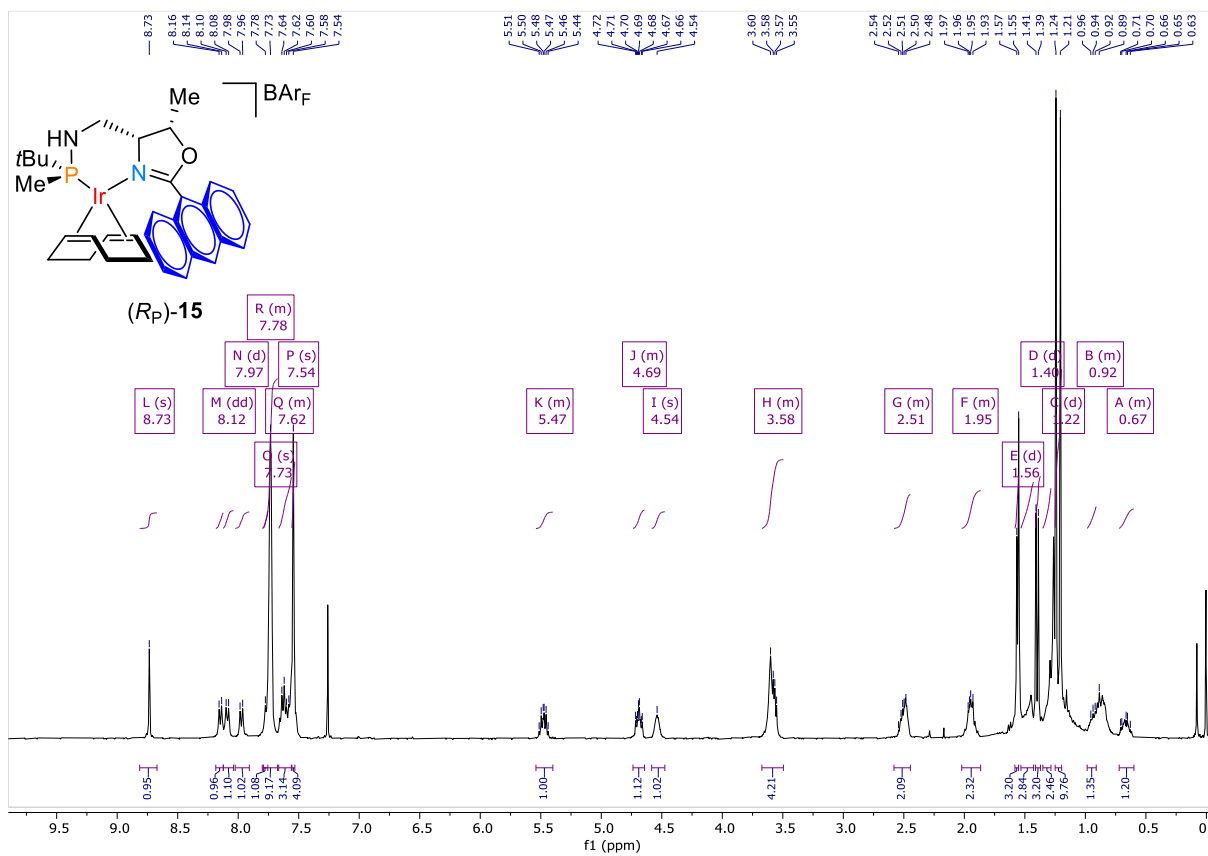

$^{13}\text{C}$ -NMR (101 MHz,  $\text{CDCl}_3$ ):

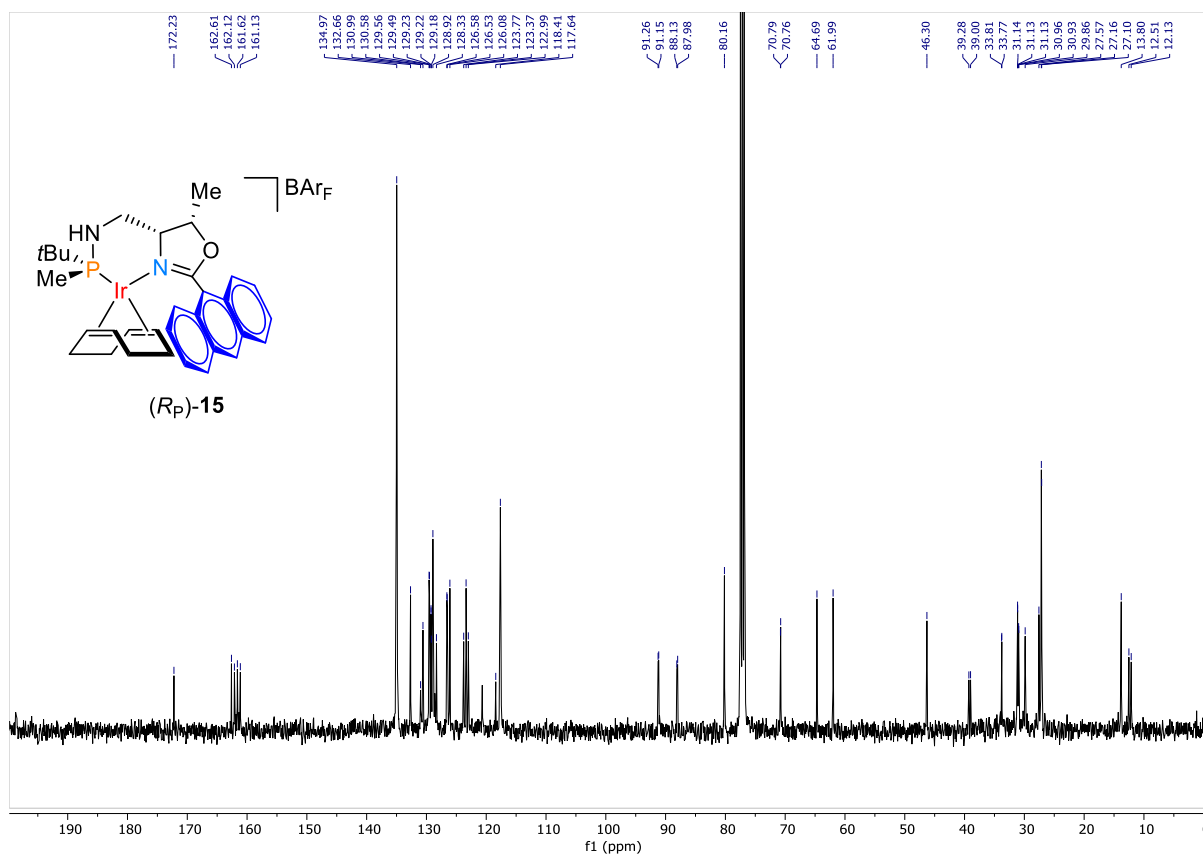

$^{31}\text{P}$ -NMR (162 MHz,  $\text{CDCl}_3$ ):

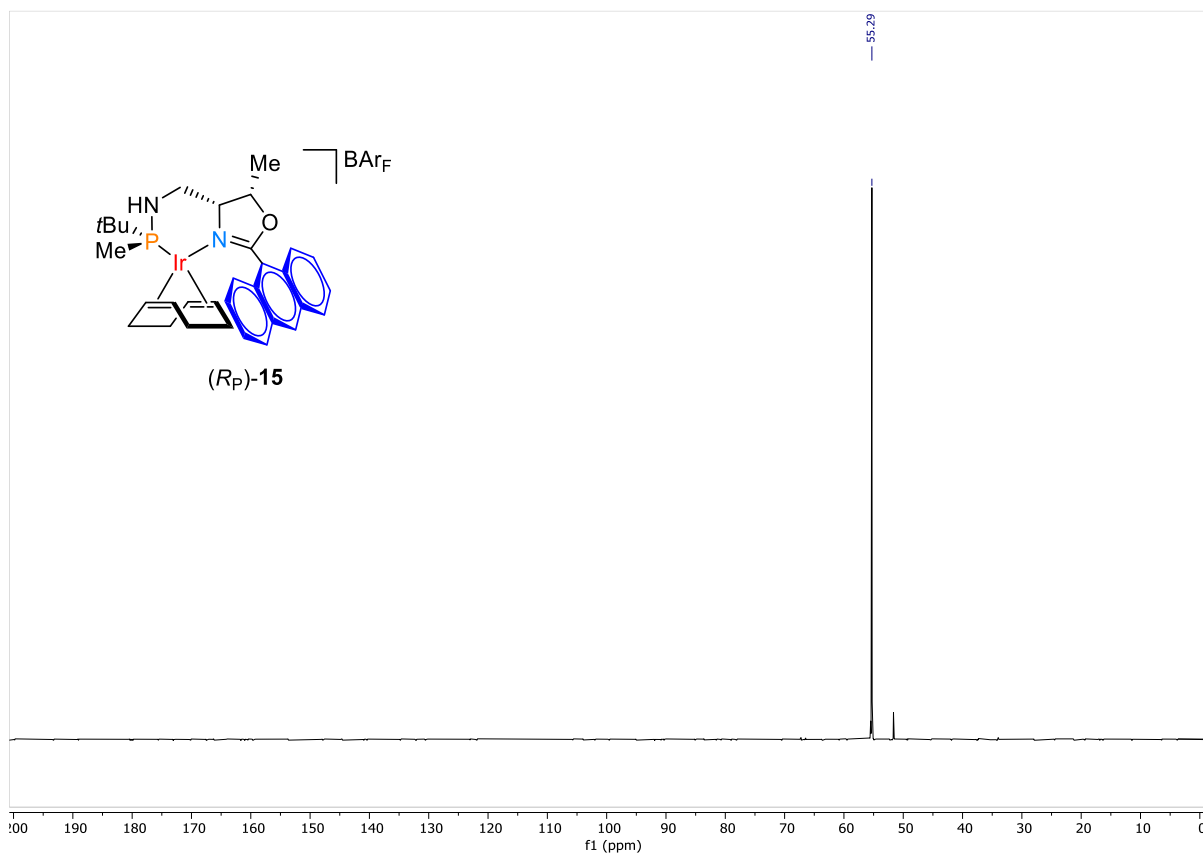



<sup>1</sup>H-NMR (400 MHz, CDCl<sub>3</sub>):

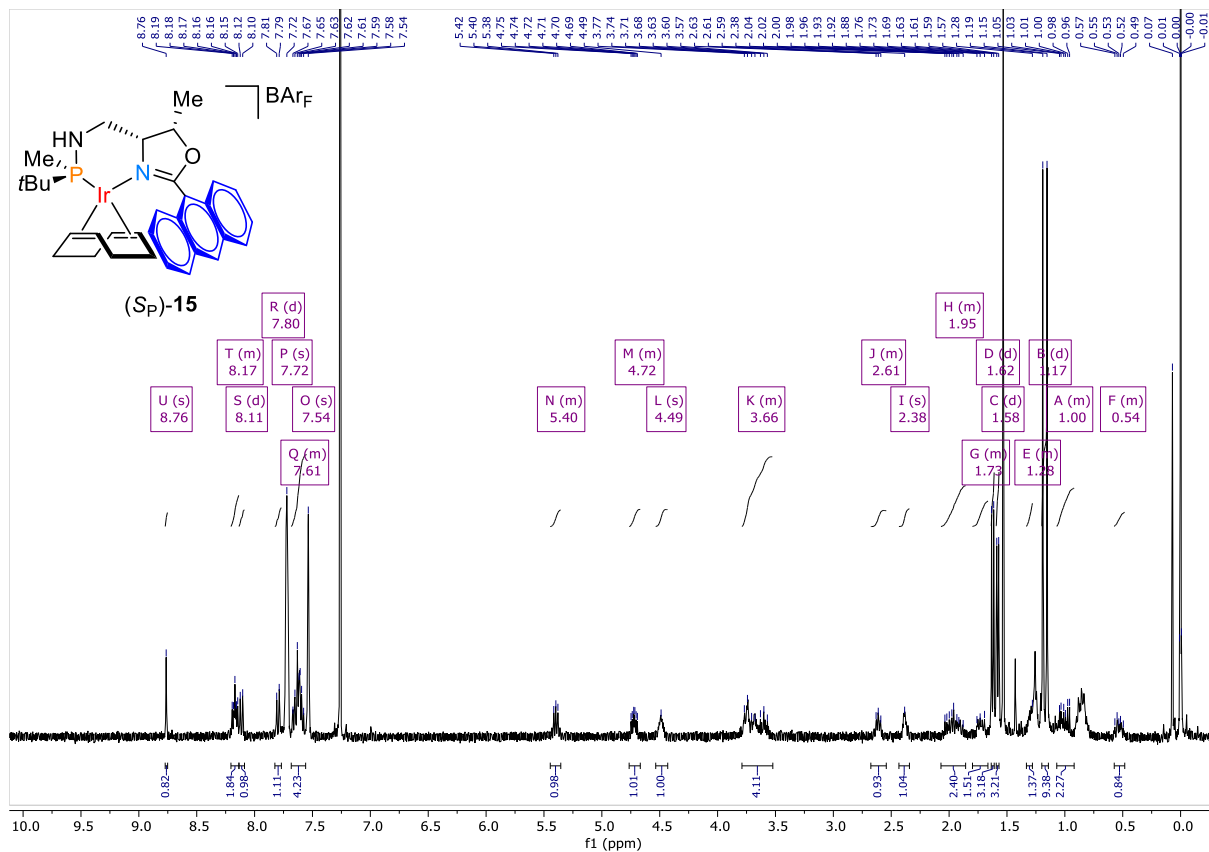

<sup>13</sup>C-NMR (101 MHz, CDCl<sub>3</sub>):

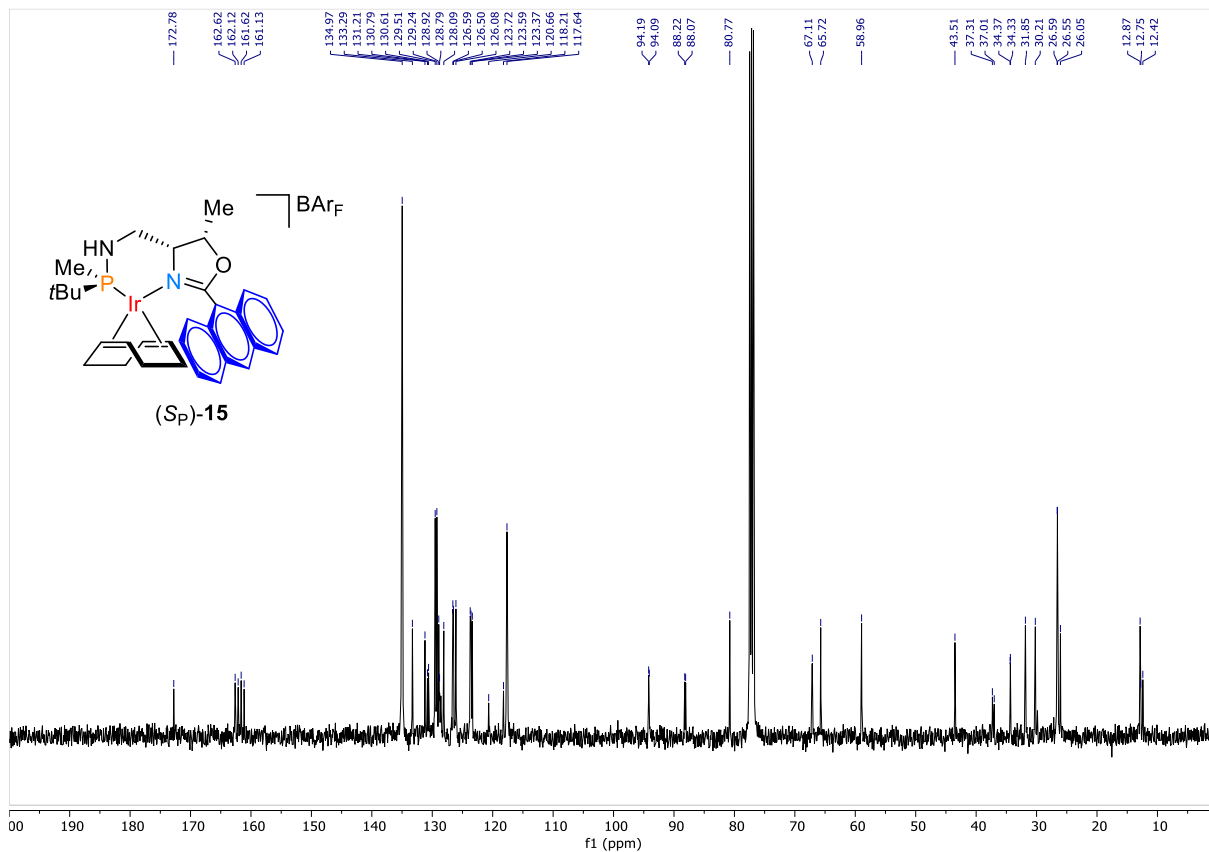

$^{31}\text{P}$ -NMR (162 MHz,  $\text{CDCl}_3$ ):

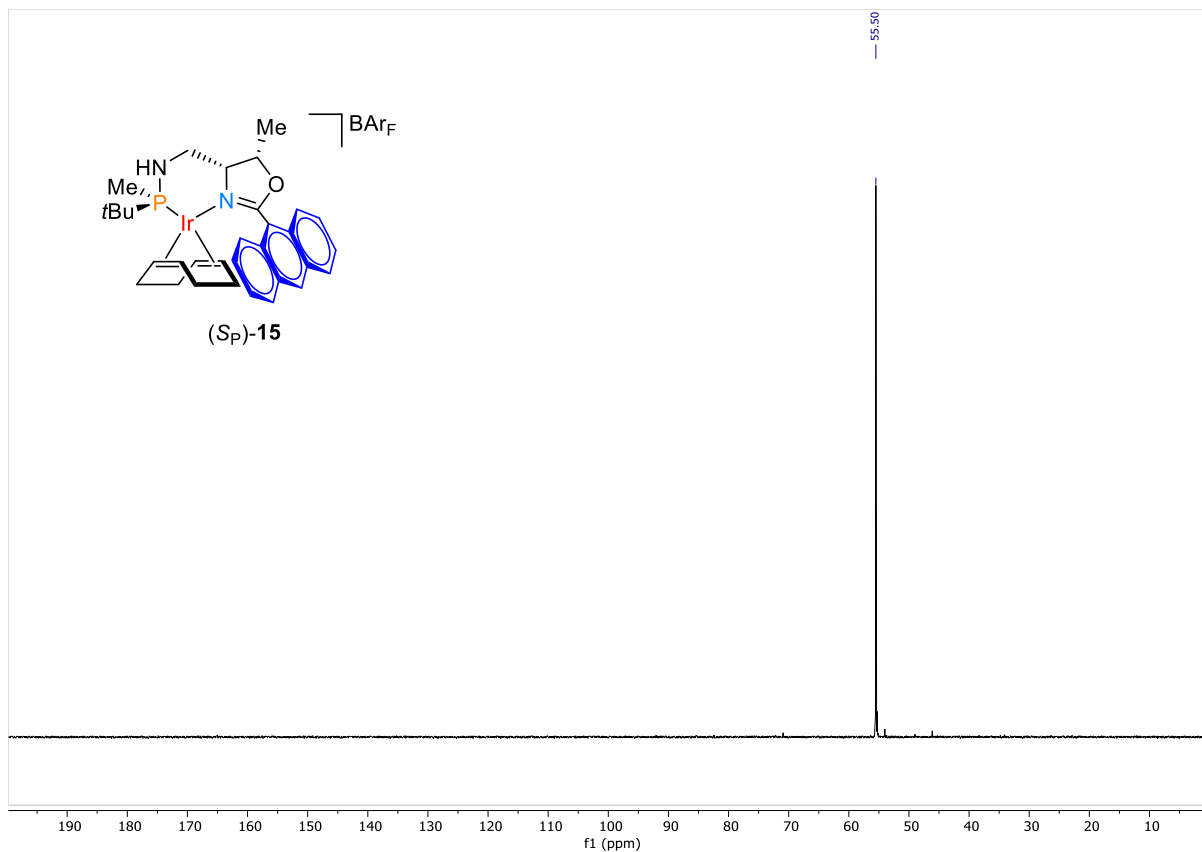

$^1\text{H}$ -NMR (400 MHz,  $\text{CDCl}_3$ ):

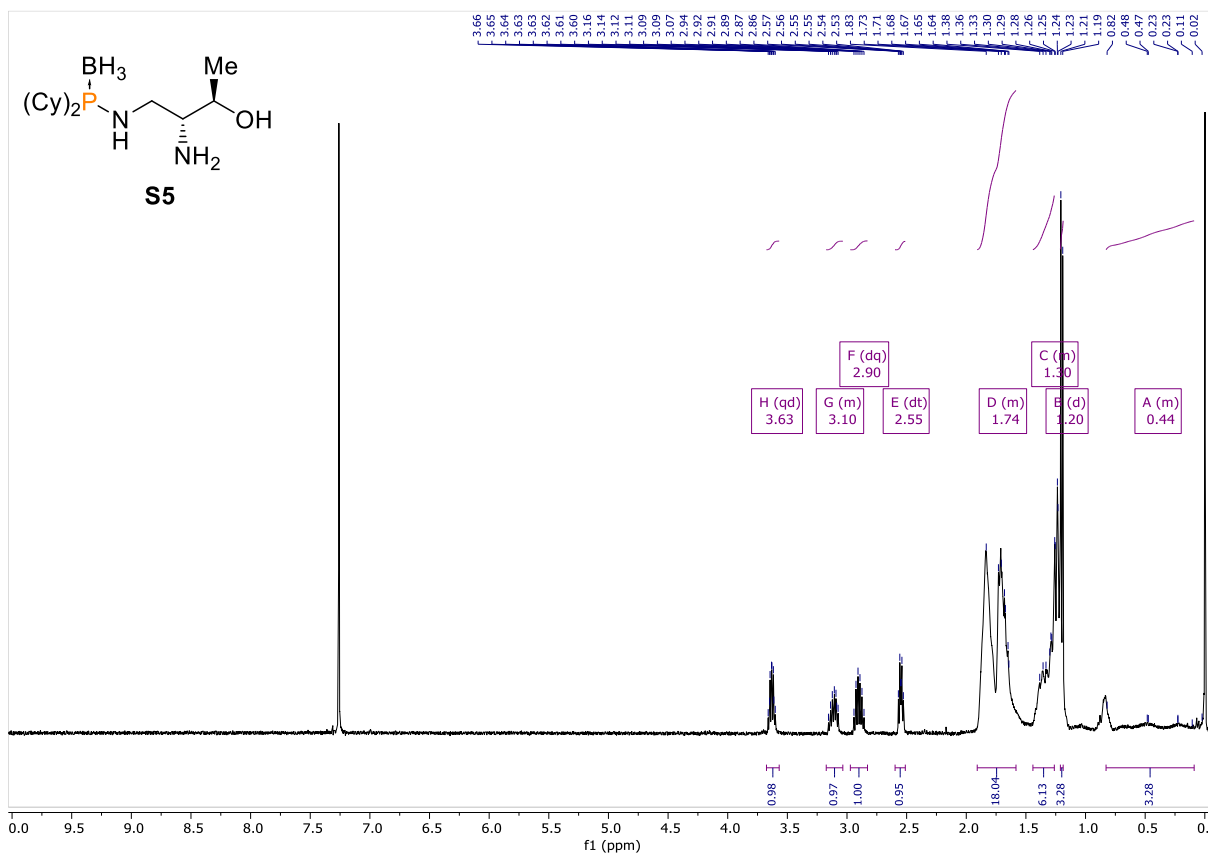

$^{13}\text{C}$ -NMR (101 MHz,  $\text{CDCl}_3$ ):

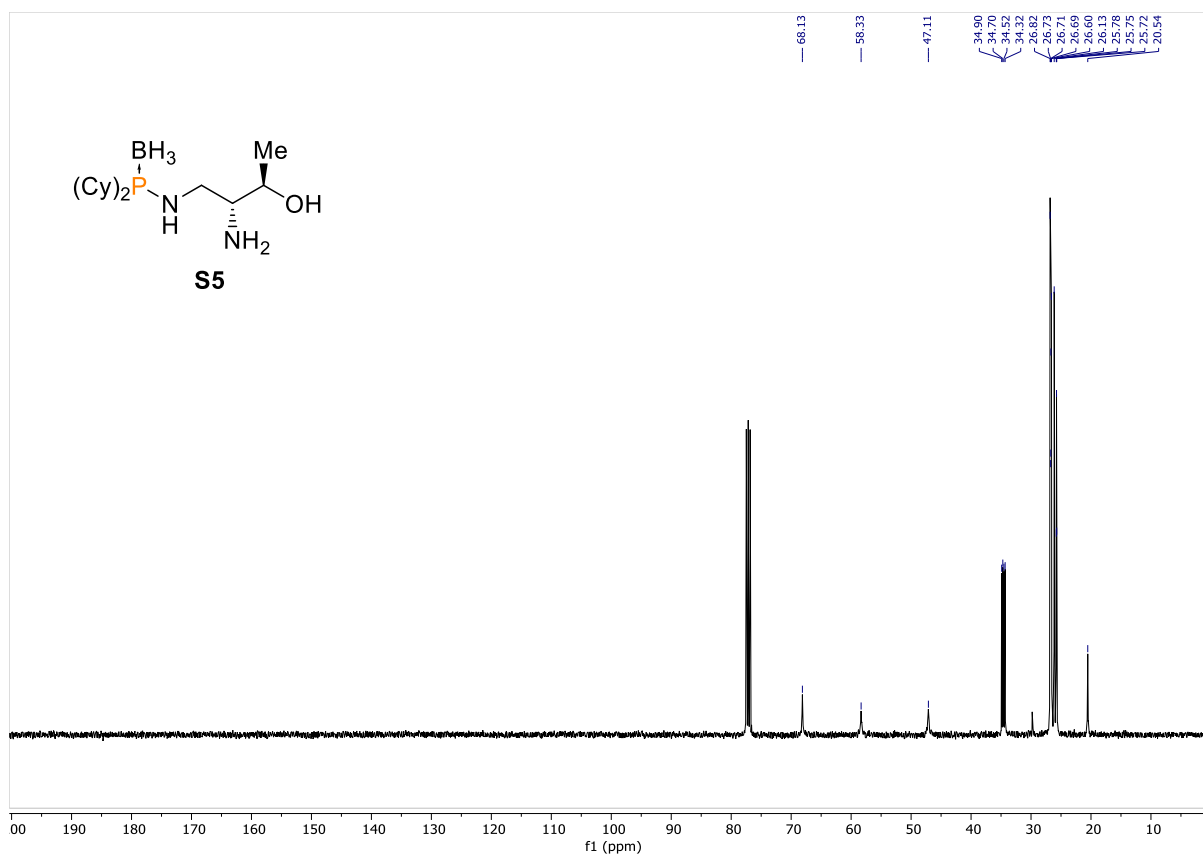

$^{31}\text{P}$ -NMR (162 MHz,  $\text{CDCl}_3$ ):

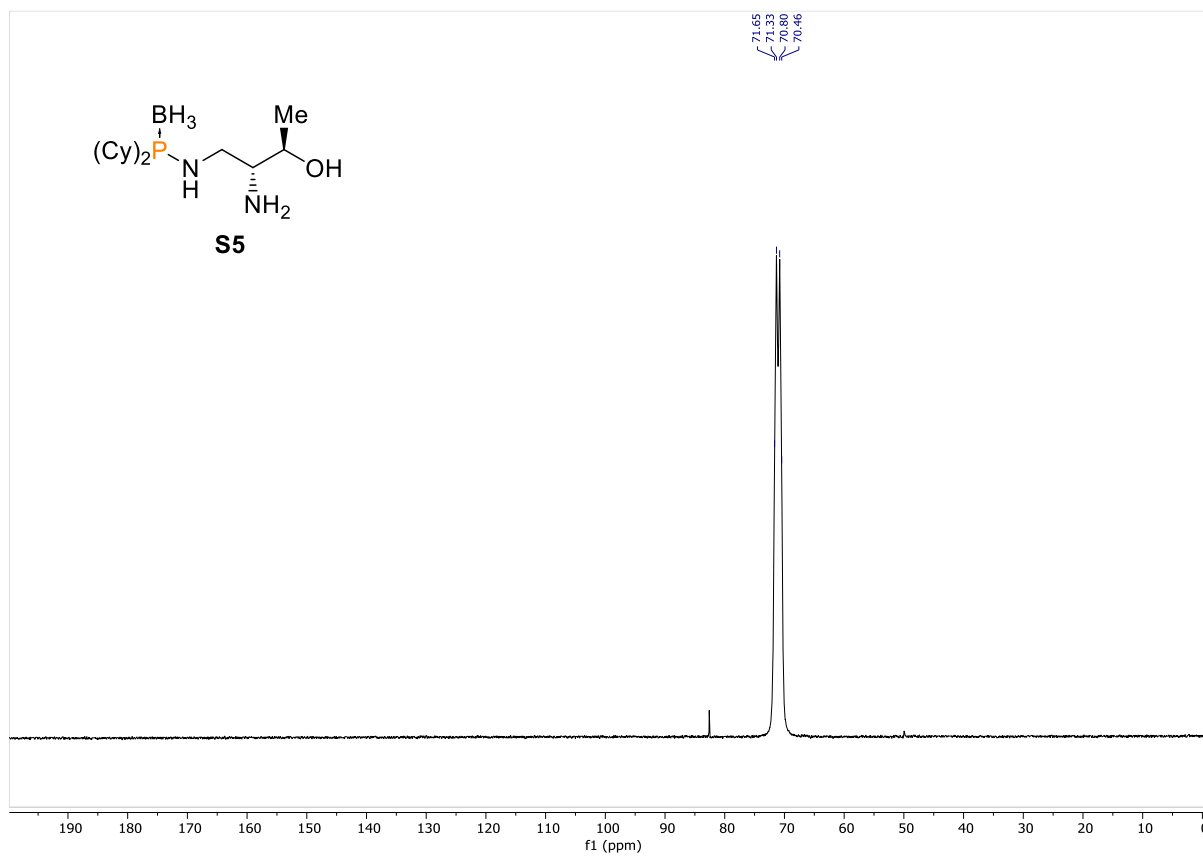

<sup>1</sup>H-NMR (400 MHz, CDCl<sub>3</sub>):

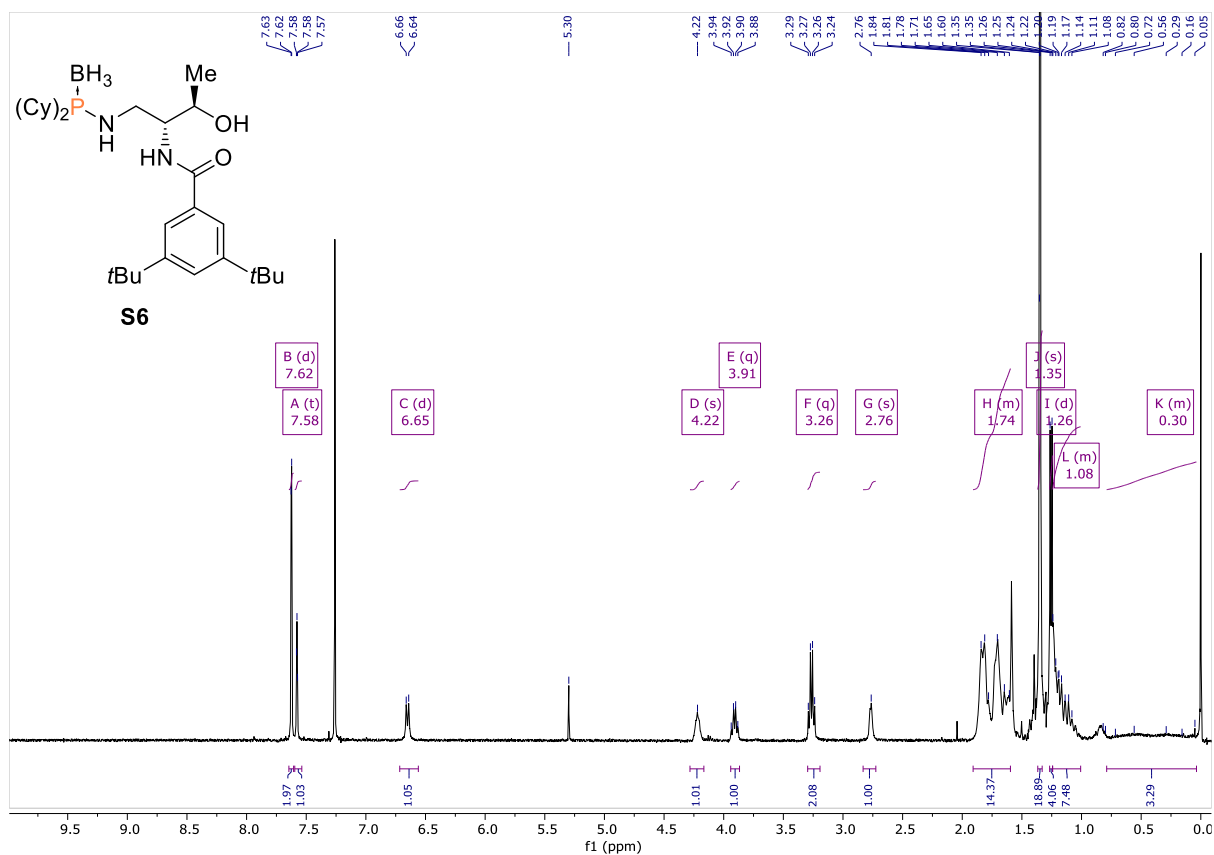

<sup>1</sup>H-NMR (400 MHz, CDCl<sub>3</sub>):

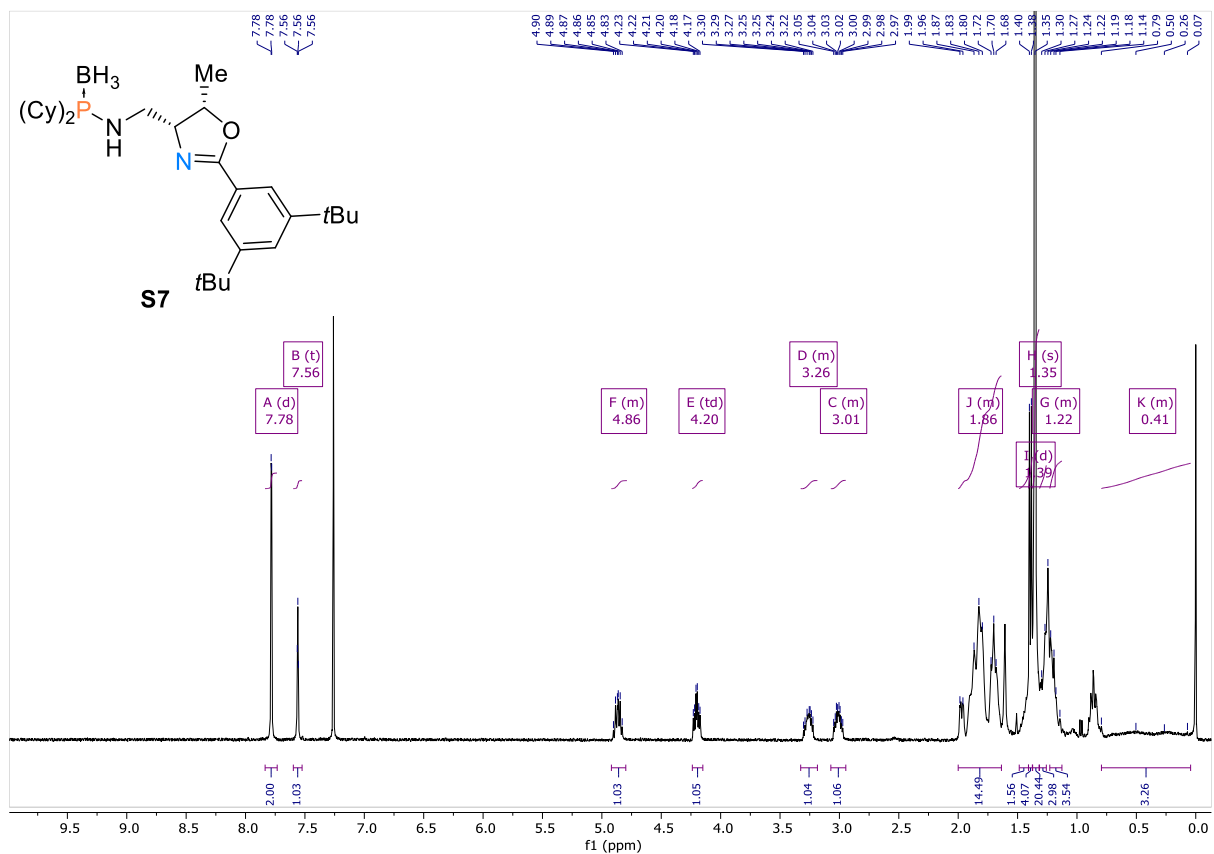

$^{13}\text{C}$ -NMR (101 MHz,  $\text{CDCl}_3$ ):

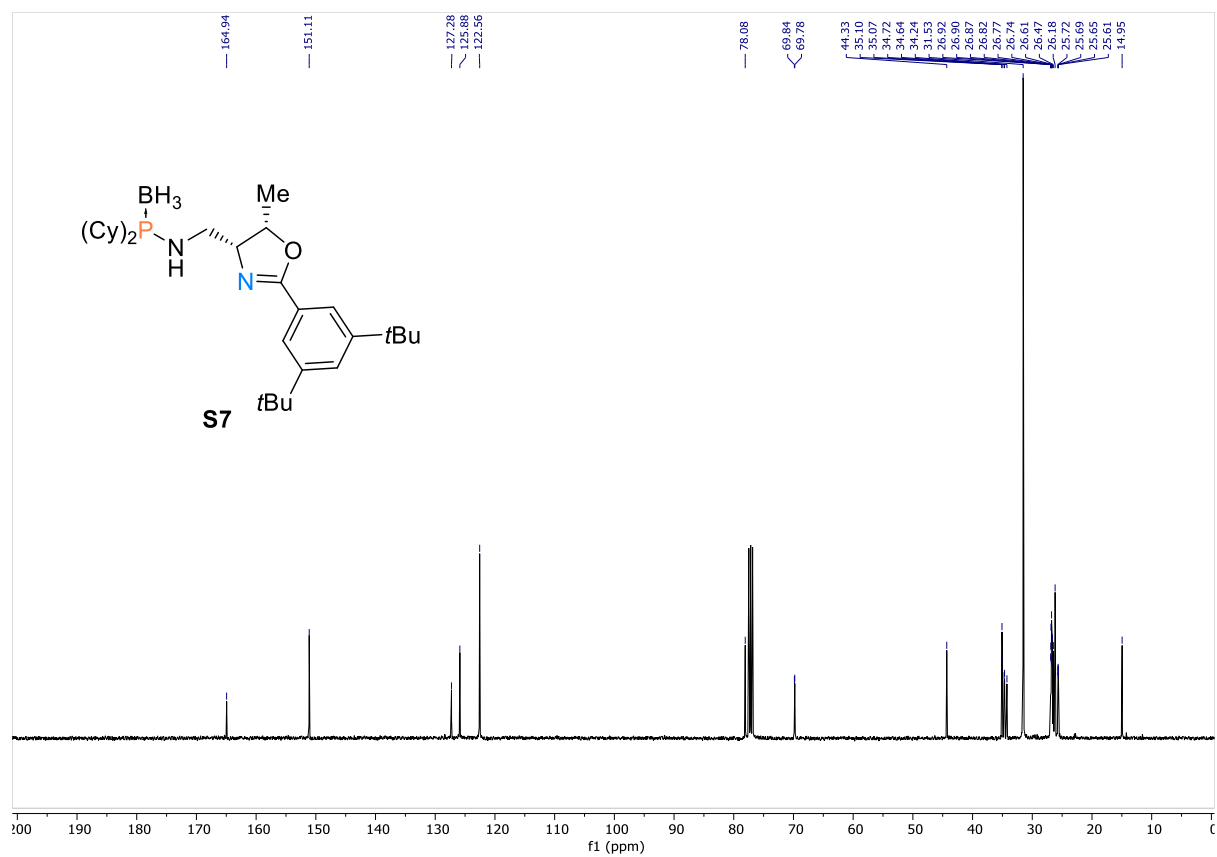

$^{31}\text{P}$ -NMR (162 MHz,  $\text{CDCl}_3$ ):

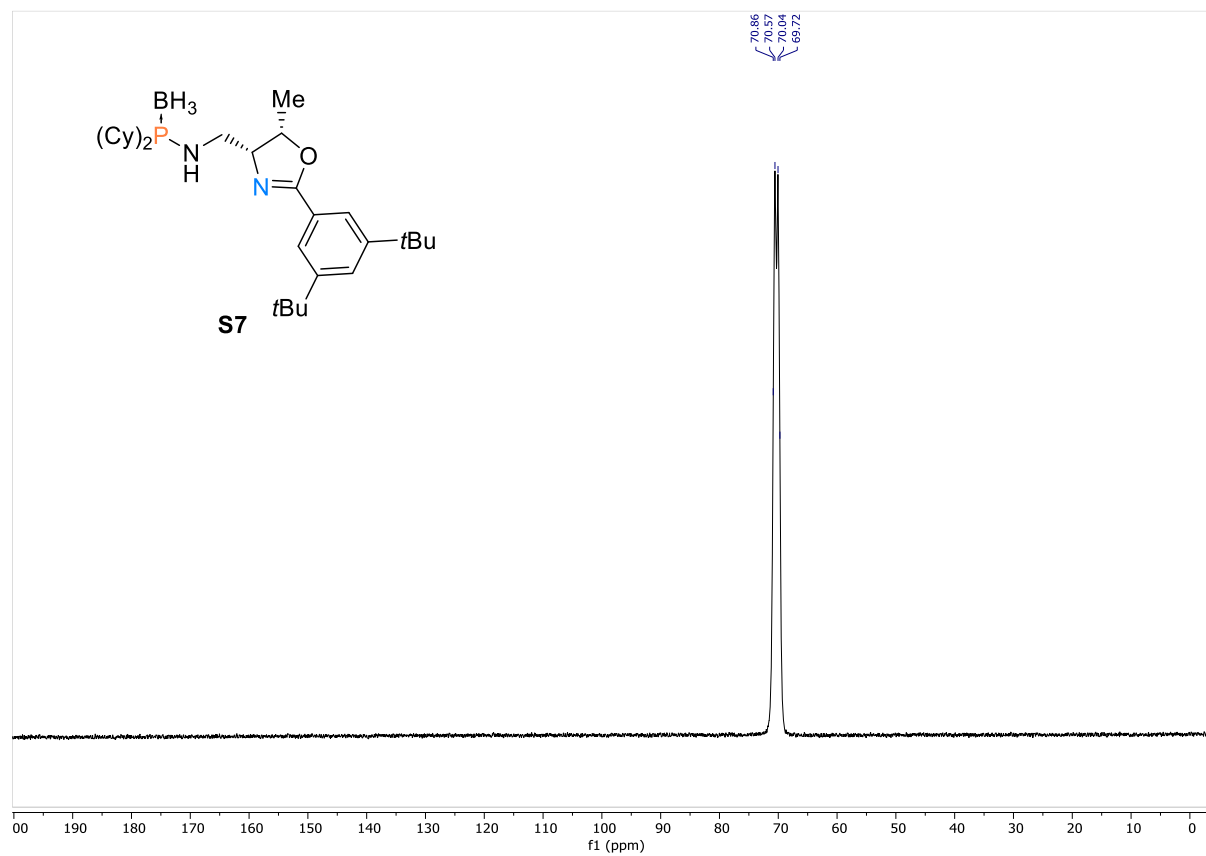

<sup>1</sup>H-NMR (400 MHz, CDCl<sub>3</sub>):

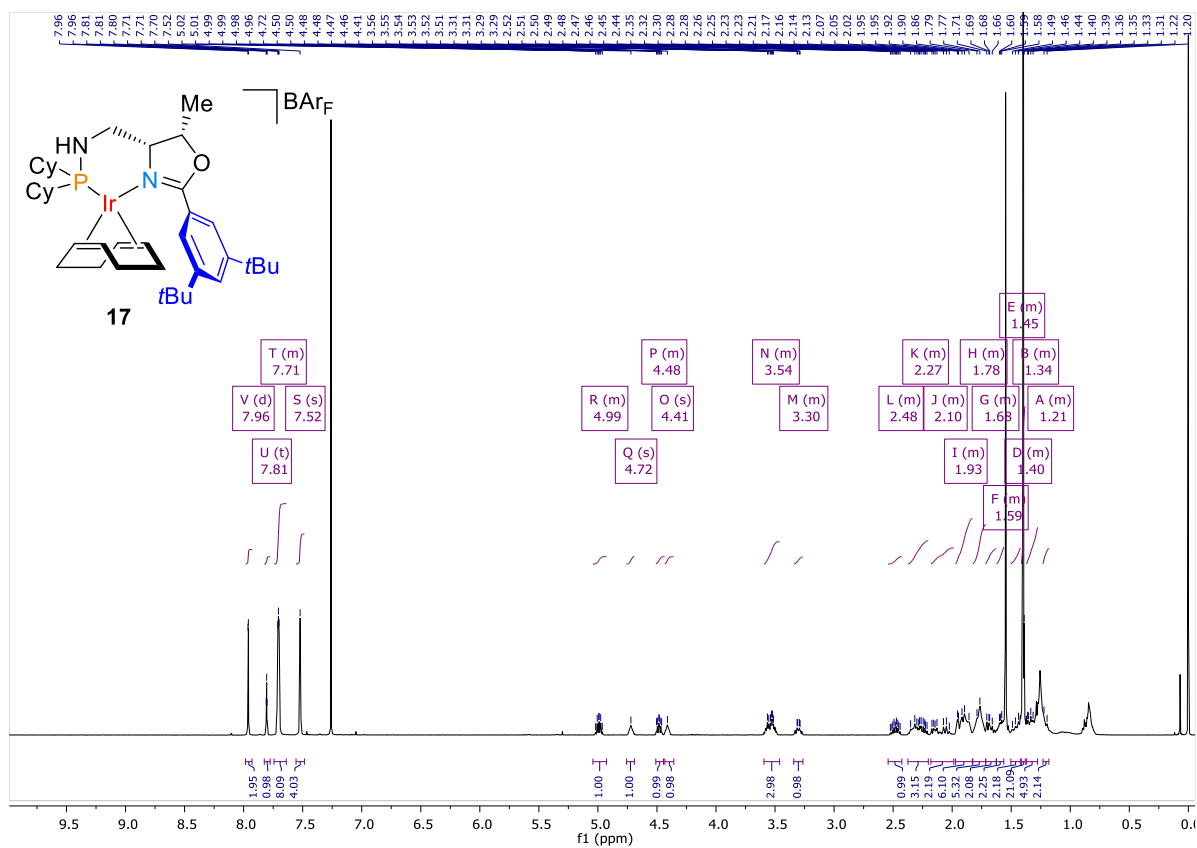

<sup>13</sup>C-NMR (101 MHz, CDCl<sub>3</sub>):

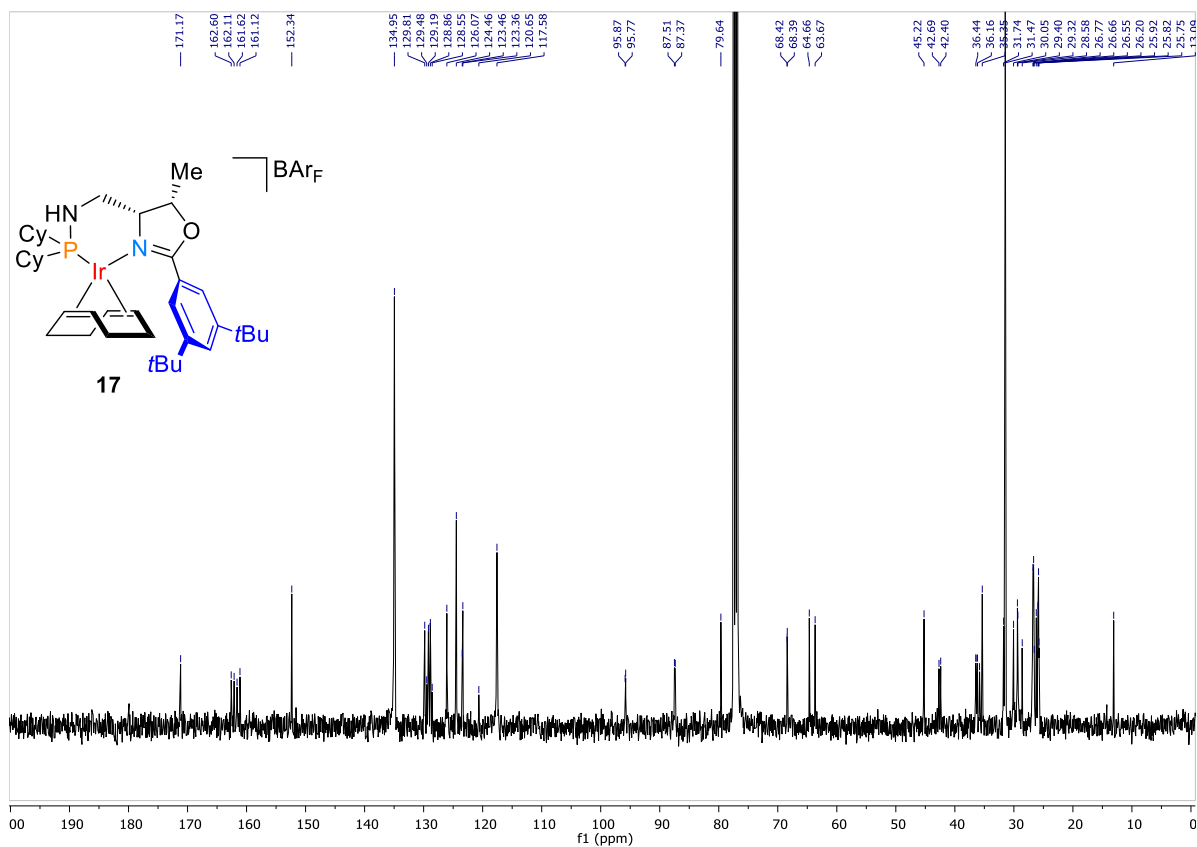

$^{31}\text{P}$ -NMR (162 MHz,  $\text{CDCl}_3$ ):

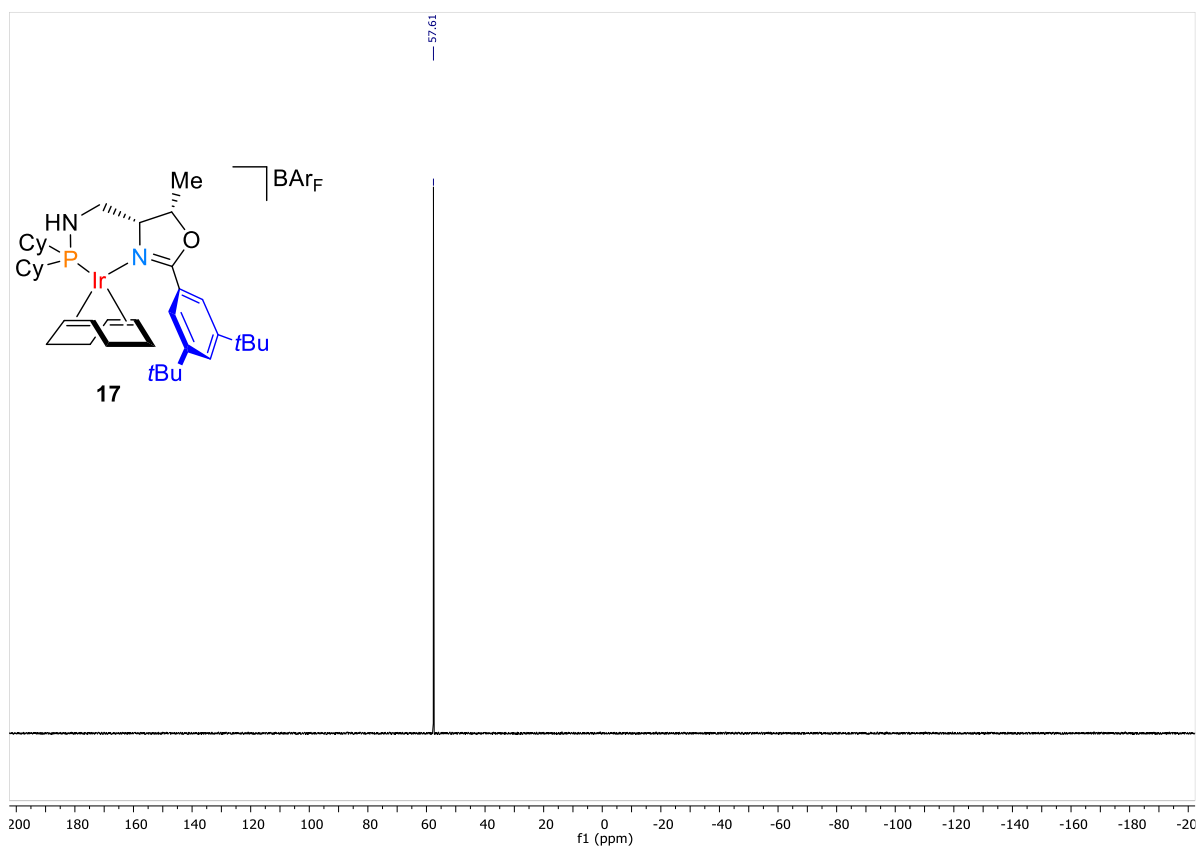

$^1\text{H}$ -NMR (400 MHz,  $\text{CDCl}_3$ ):

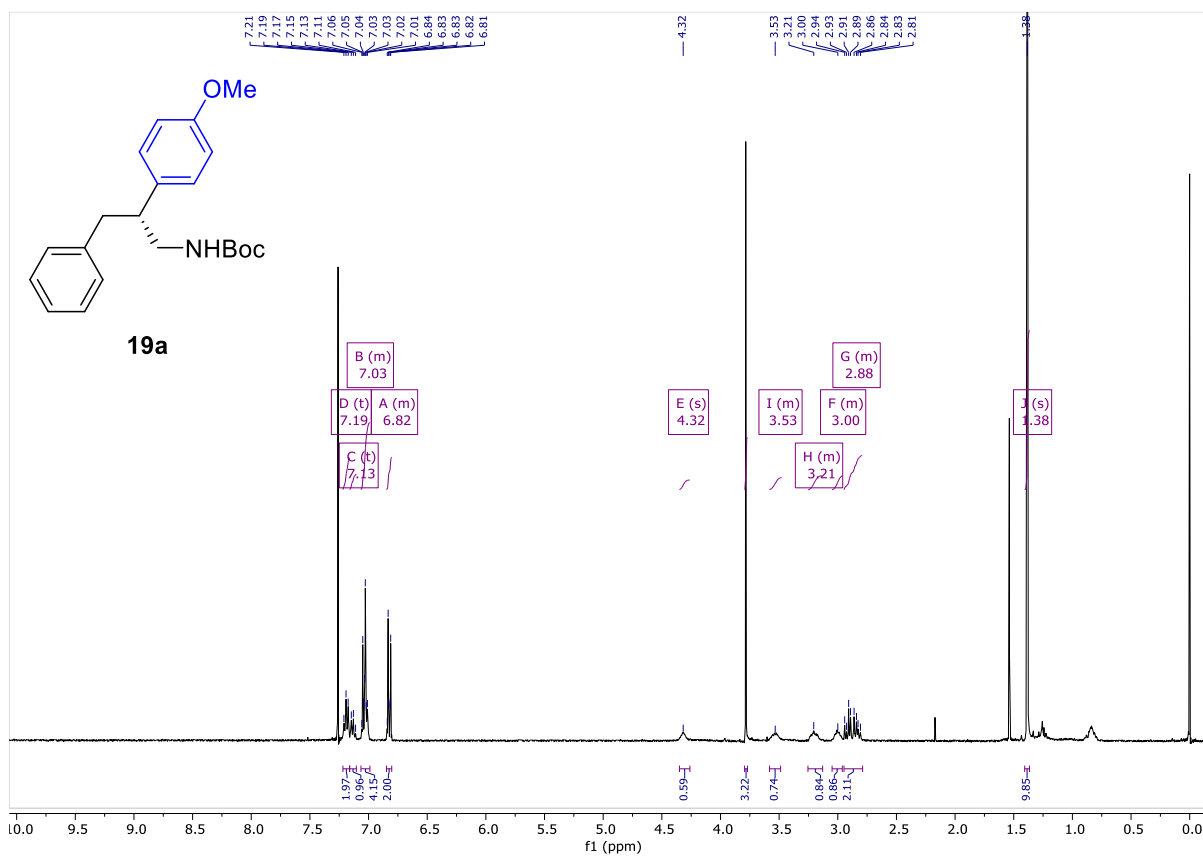

$^{13}\text{C-NMR}$  (101 MHz,  $\text{CDCl}_3$ ):

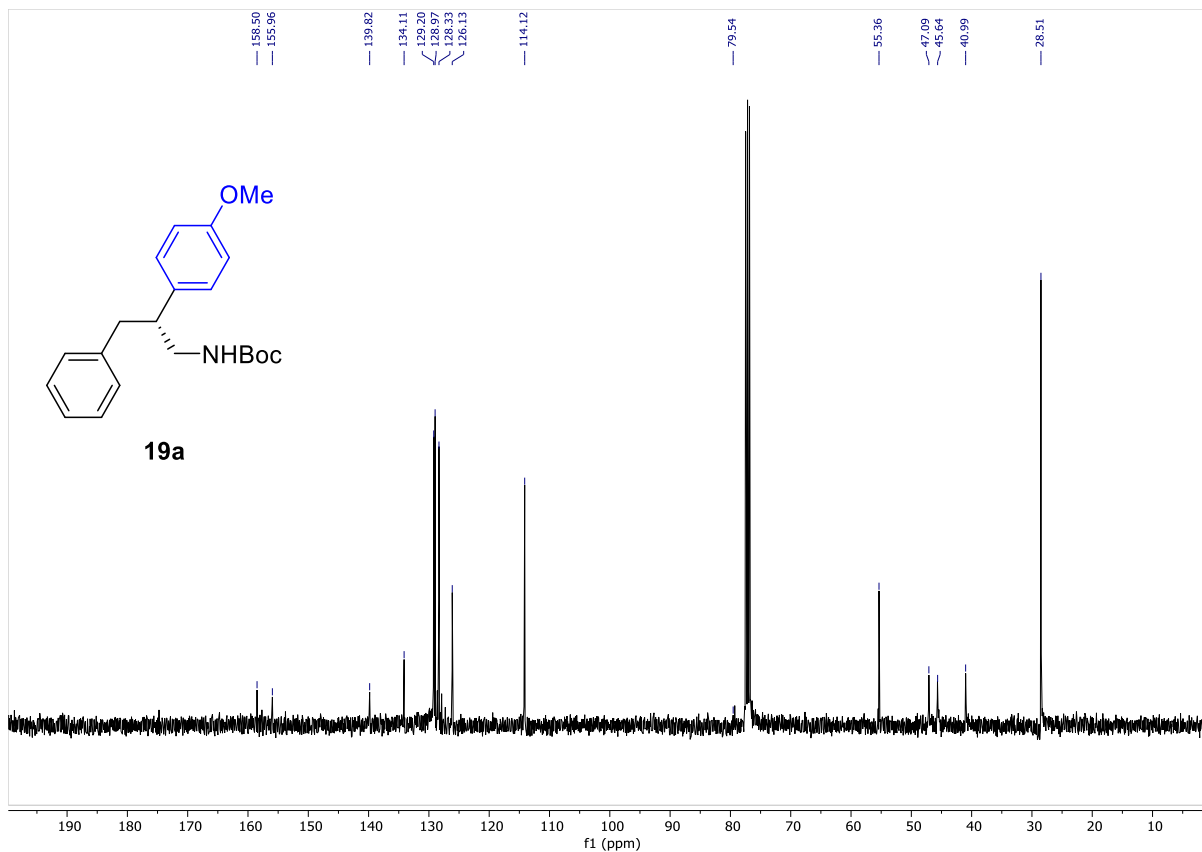

$^1\text{H-NMR}$  (400 MHz,  $\text{CDCl}_3$ ):

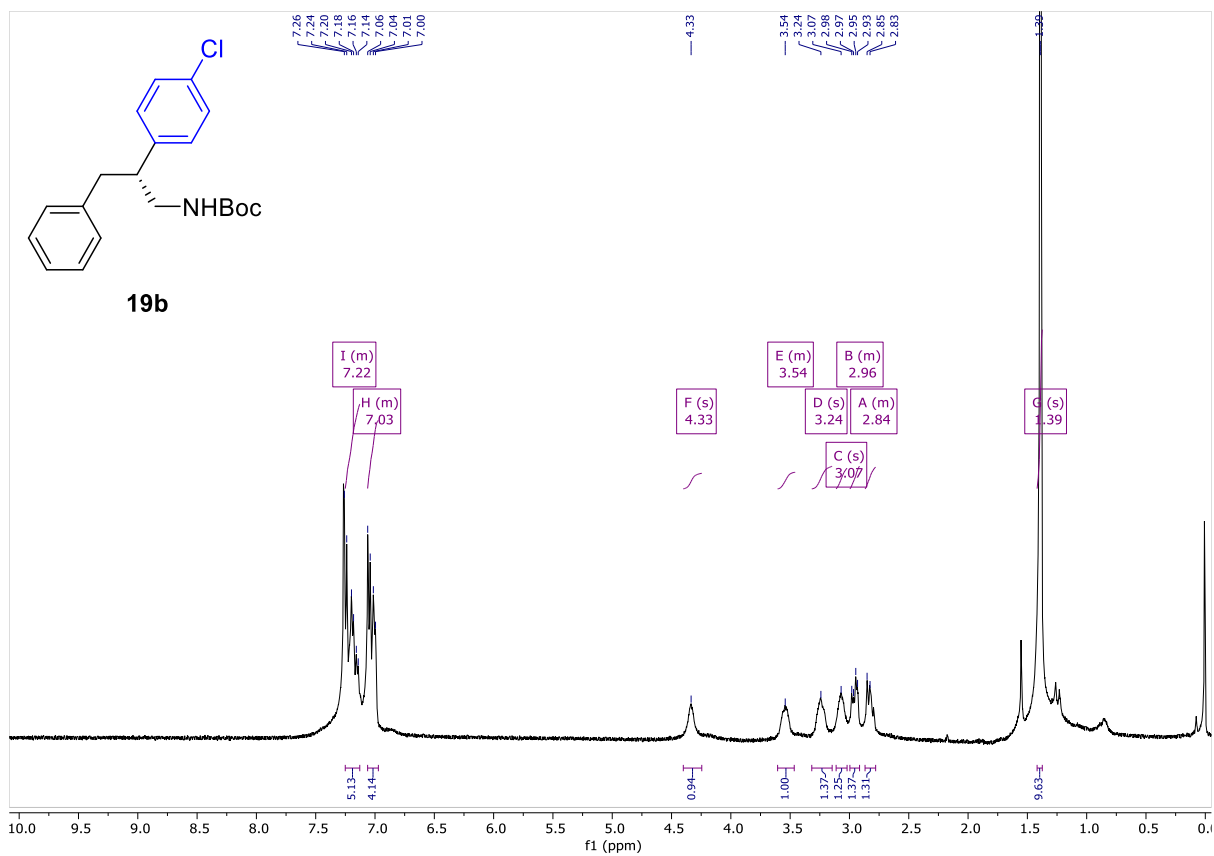



$^{13}\text{C}$ -NMR (101 MHz,  $\text{CDCl}_3$ ):

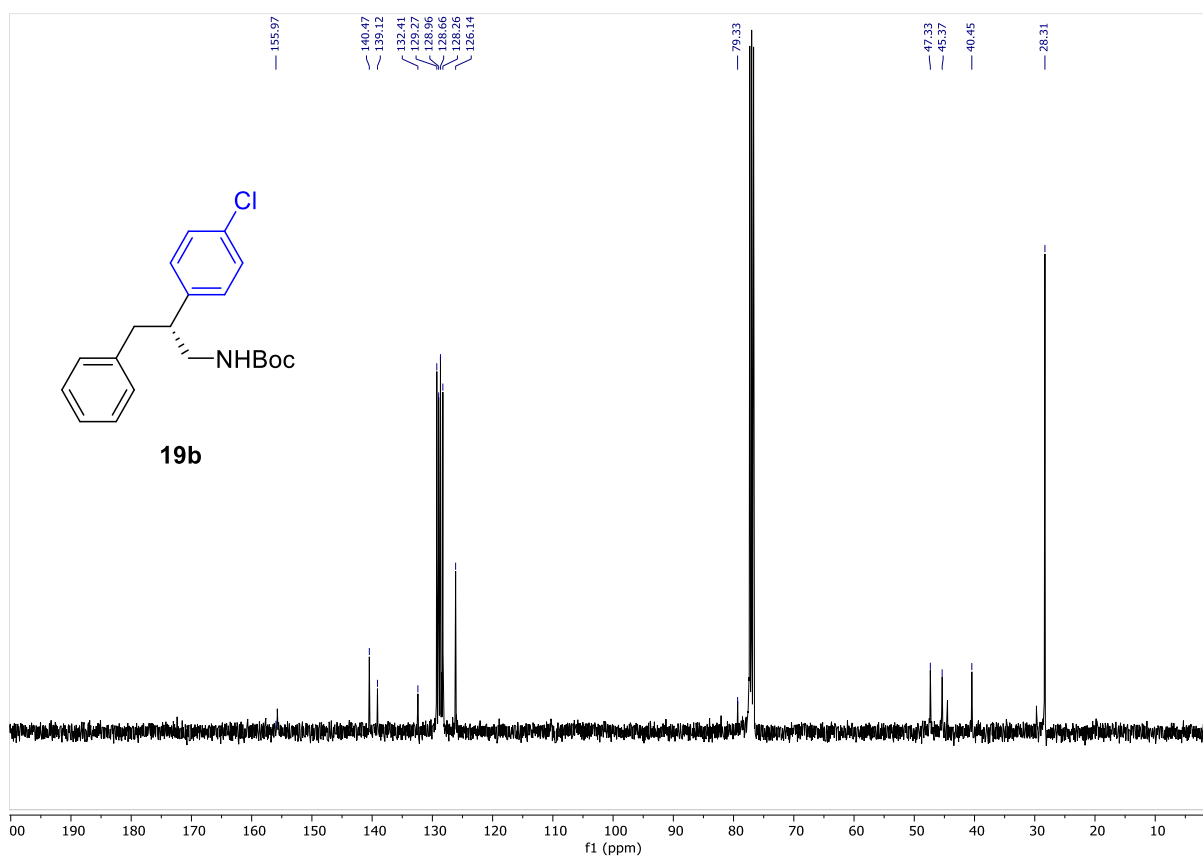

$^1\text{H}$ -NMR (400 MHz,  $\text{CDCl}_3$ ):

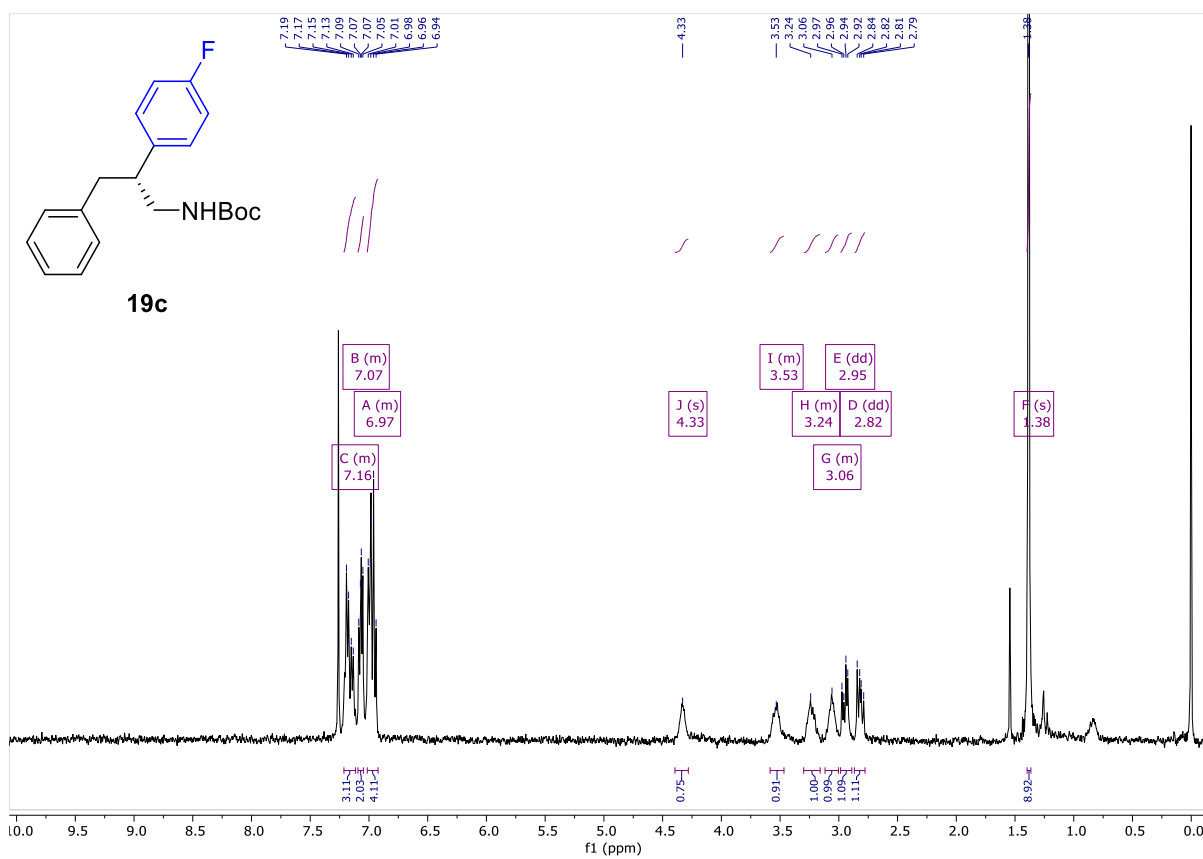

<sup>13</sup>C-NMR (101 MHz, CDCl<sub>3</sub>):

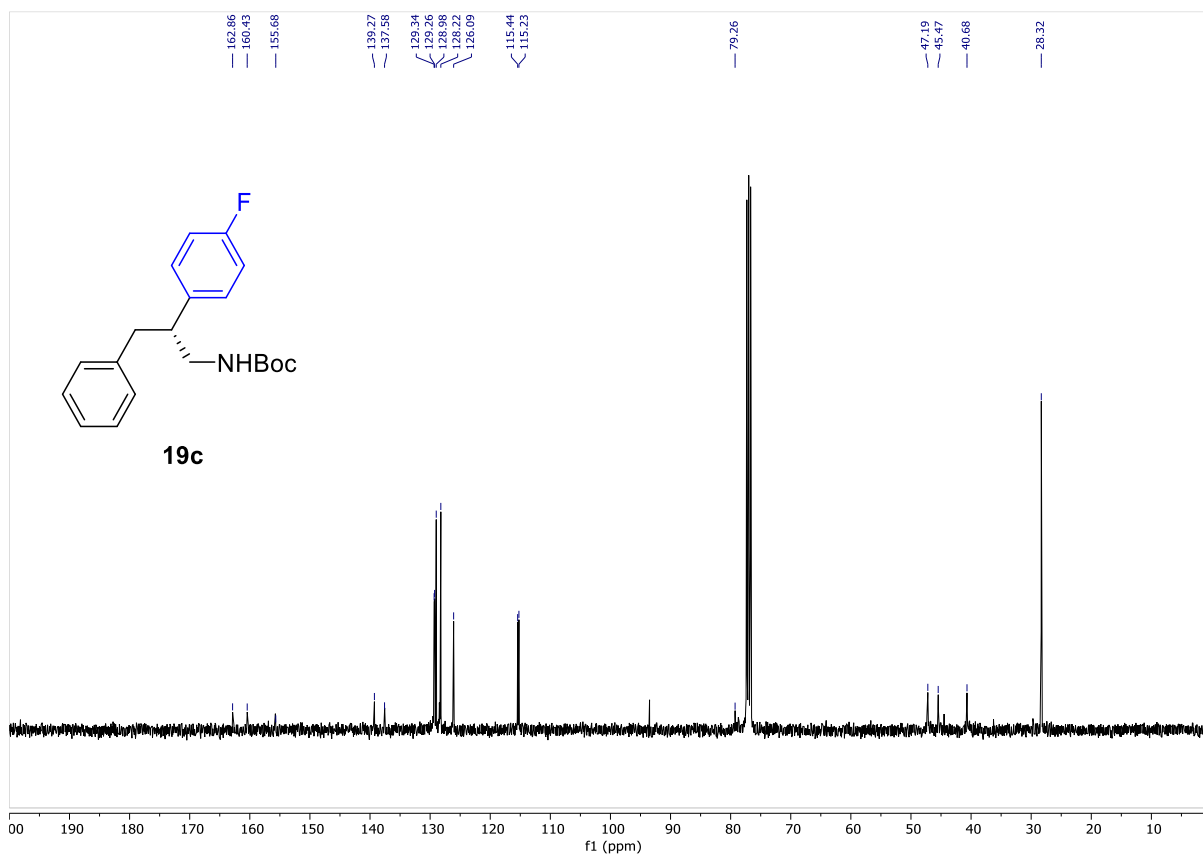

<sup>1</sup>H-NMR (400 MHz, CDCl<sub>3</sub>):

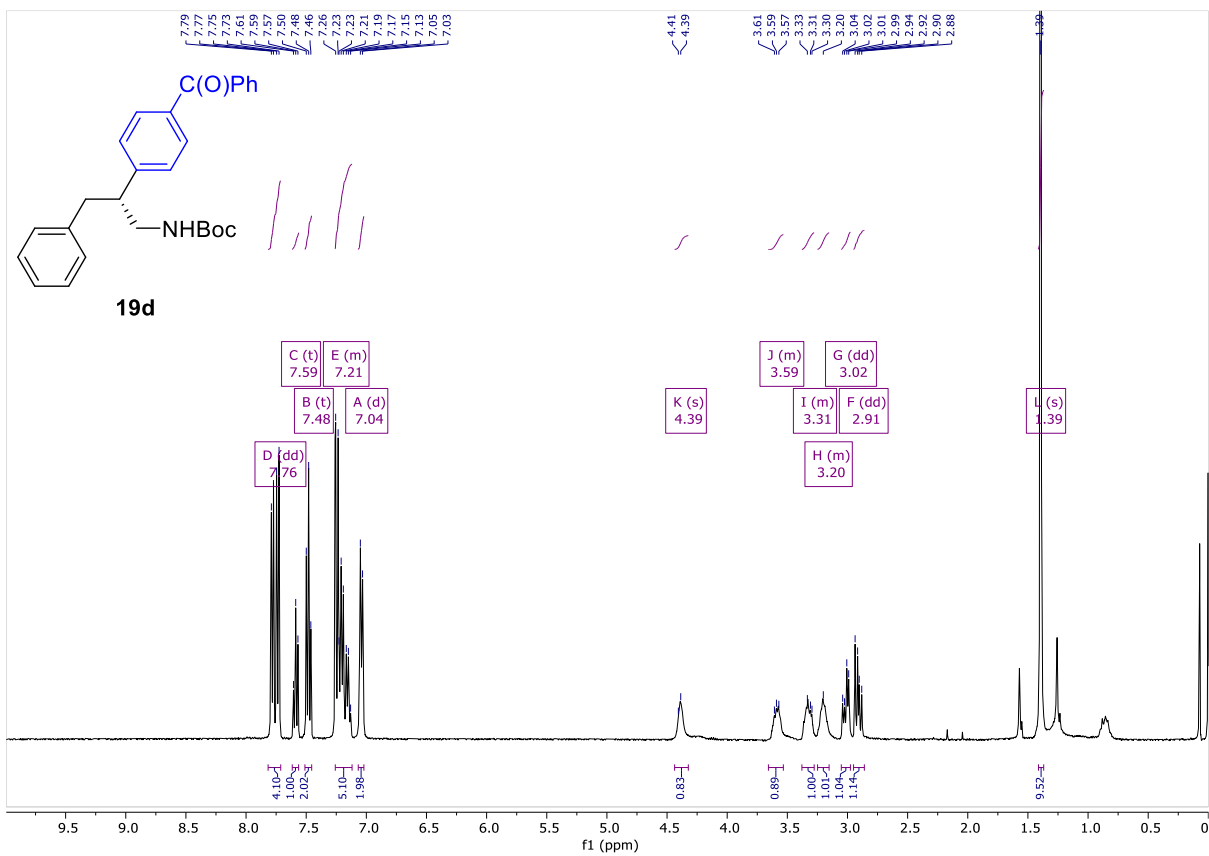

<sup>13</sup>C-NMR (101 MHz, CDCl<sub>3</sub>):

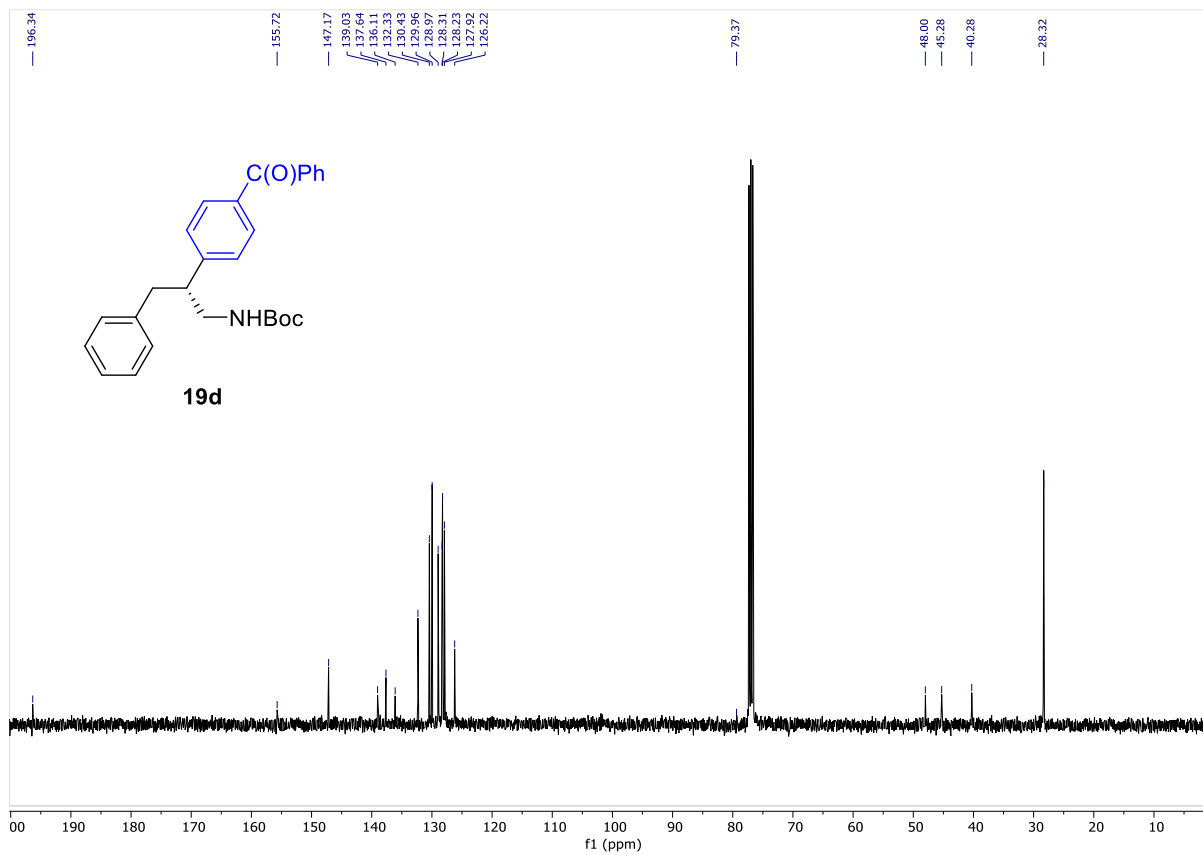

<sup>1</sup>H-NMR (400 MHz, CDCl<sub>3</sub>):

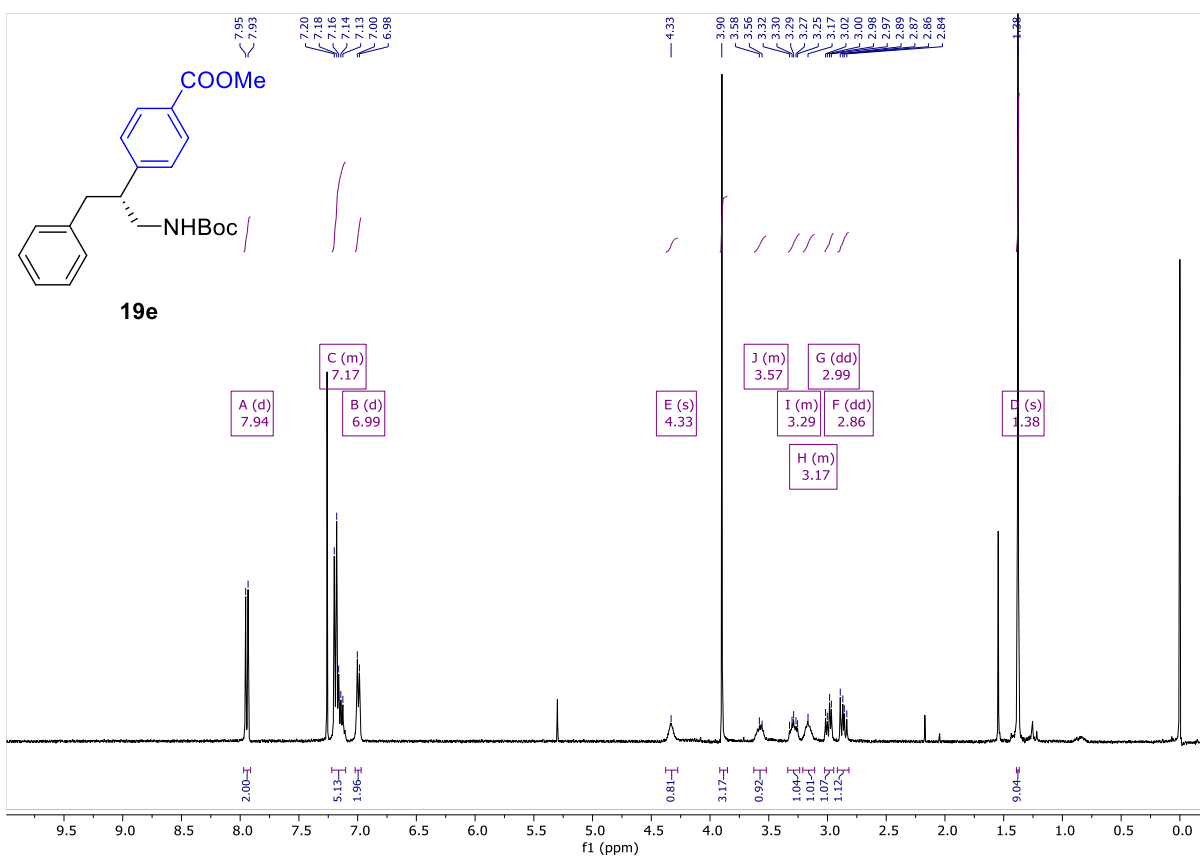

$^{13}\text{C-NMR}$  (101 MHz,  $\text{CDCl}_3$ ):

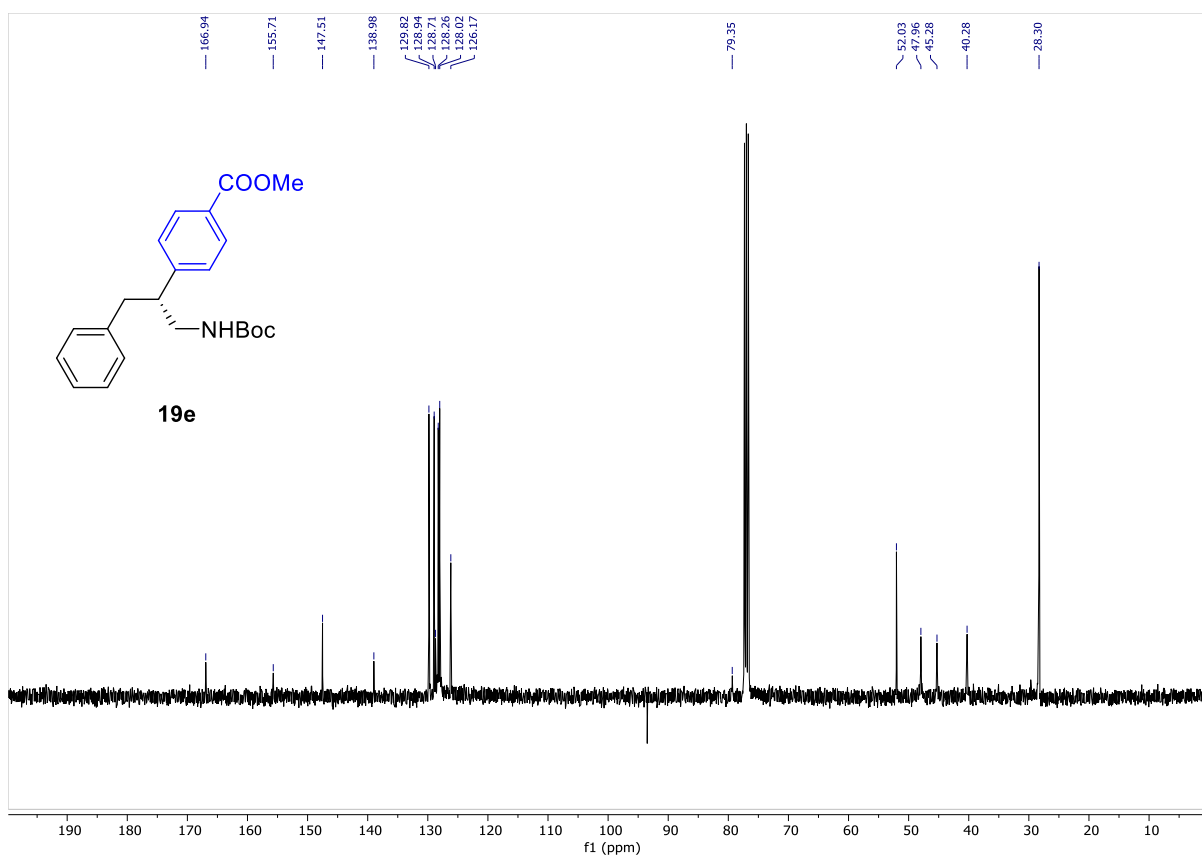

$^1\text{H-NMR}$  (400 MHz,  $\text{CDCl}_3$ ):

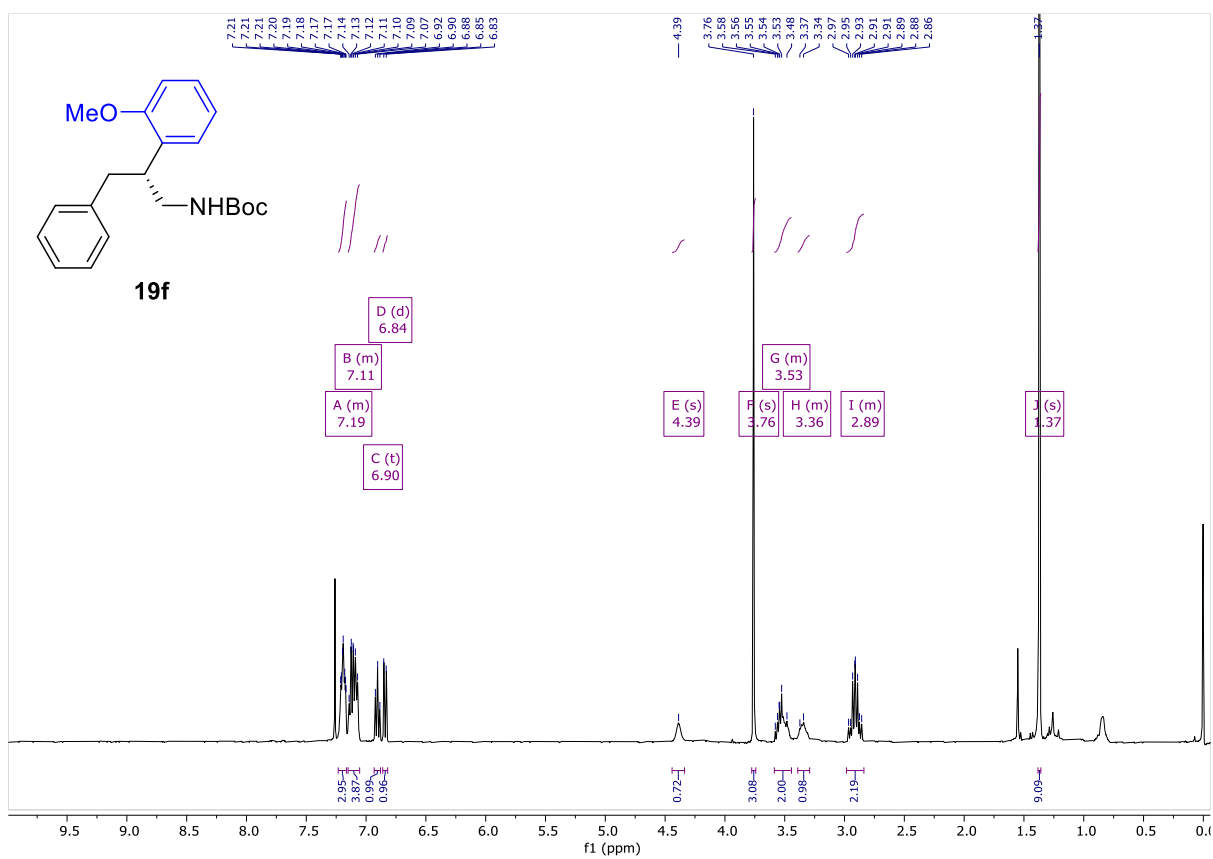

<sup>13</sup>C-NMR (101 MHz, CDCl<sub>3</sub>):

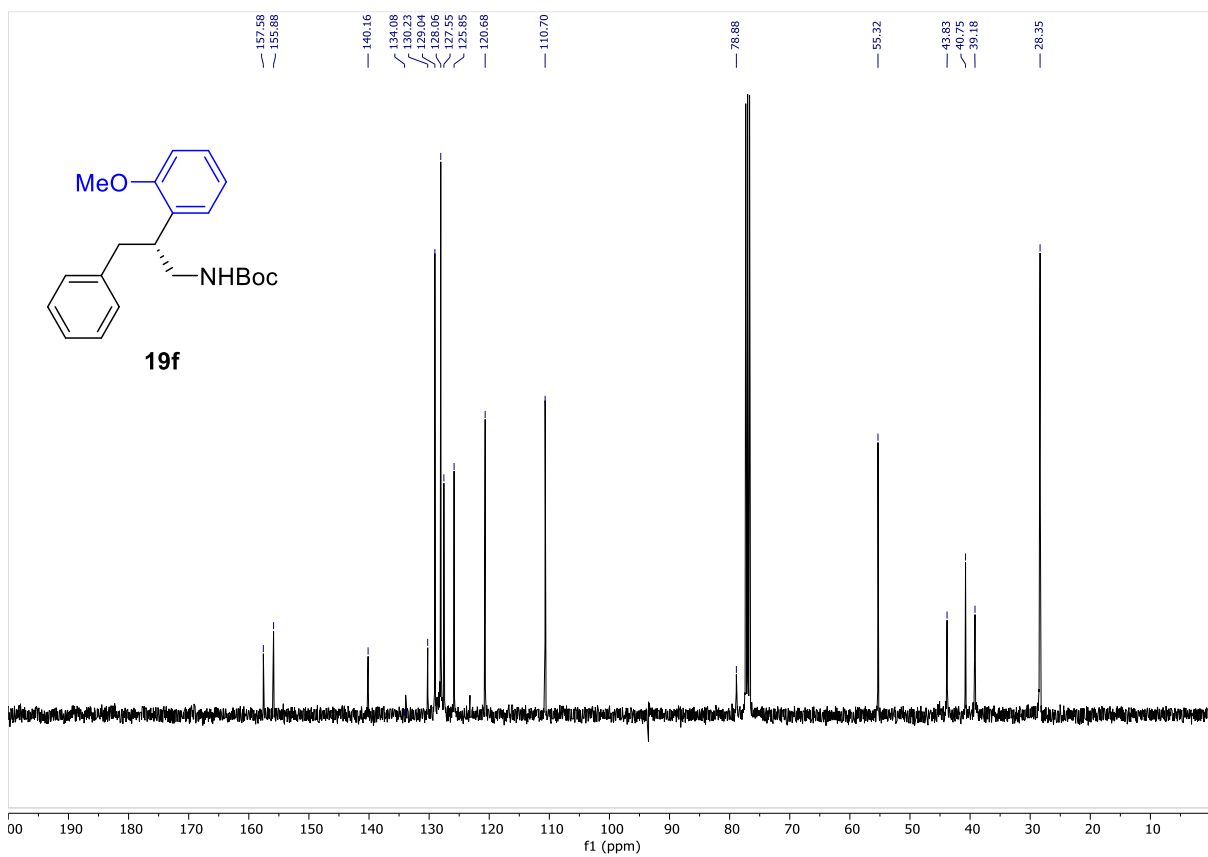

<sup>1</sup>H-NMR (400 MHz, CDCl<sub>3</sub>):

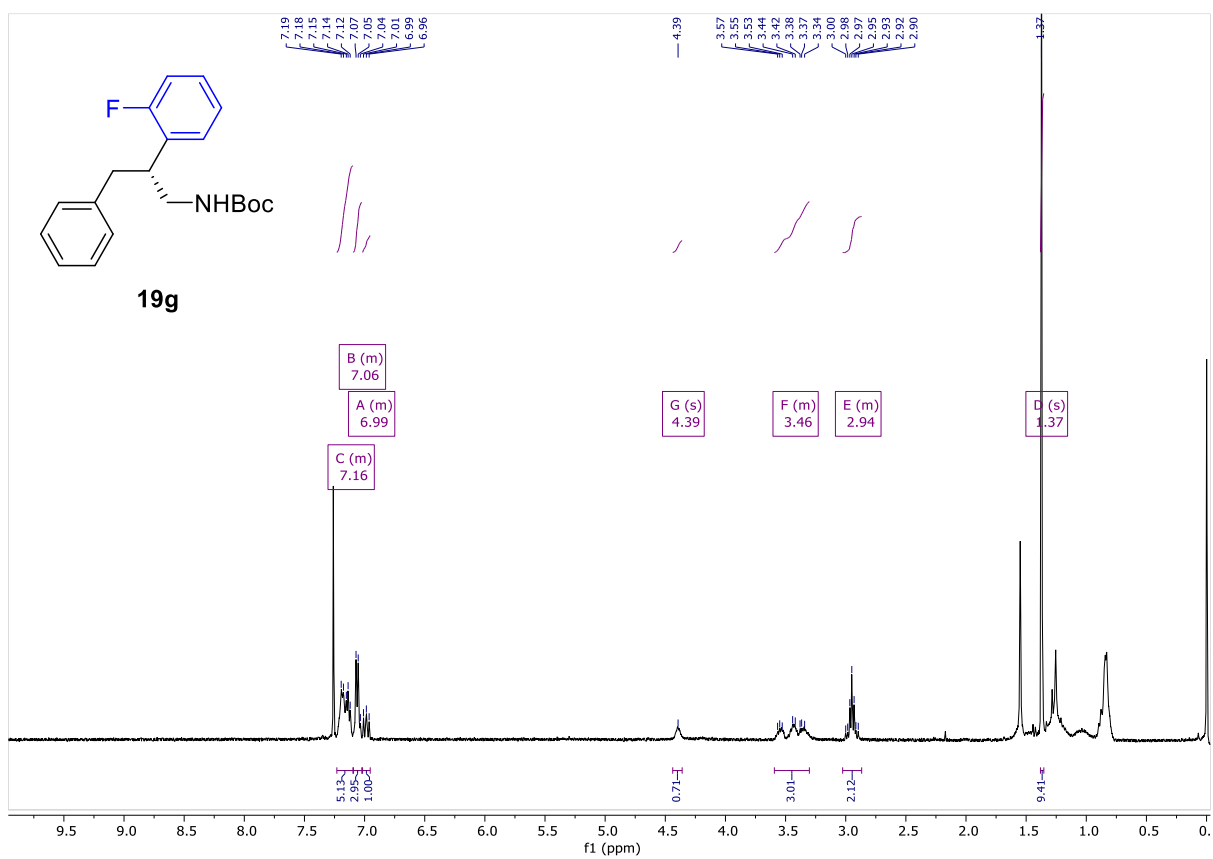

**<sup>13</sup>C-NMR (101 MHz, CDCl<sub>3</sub>):**

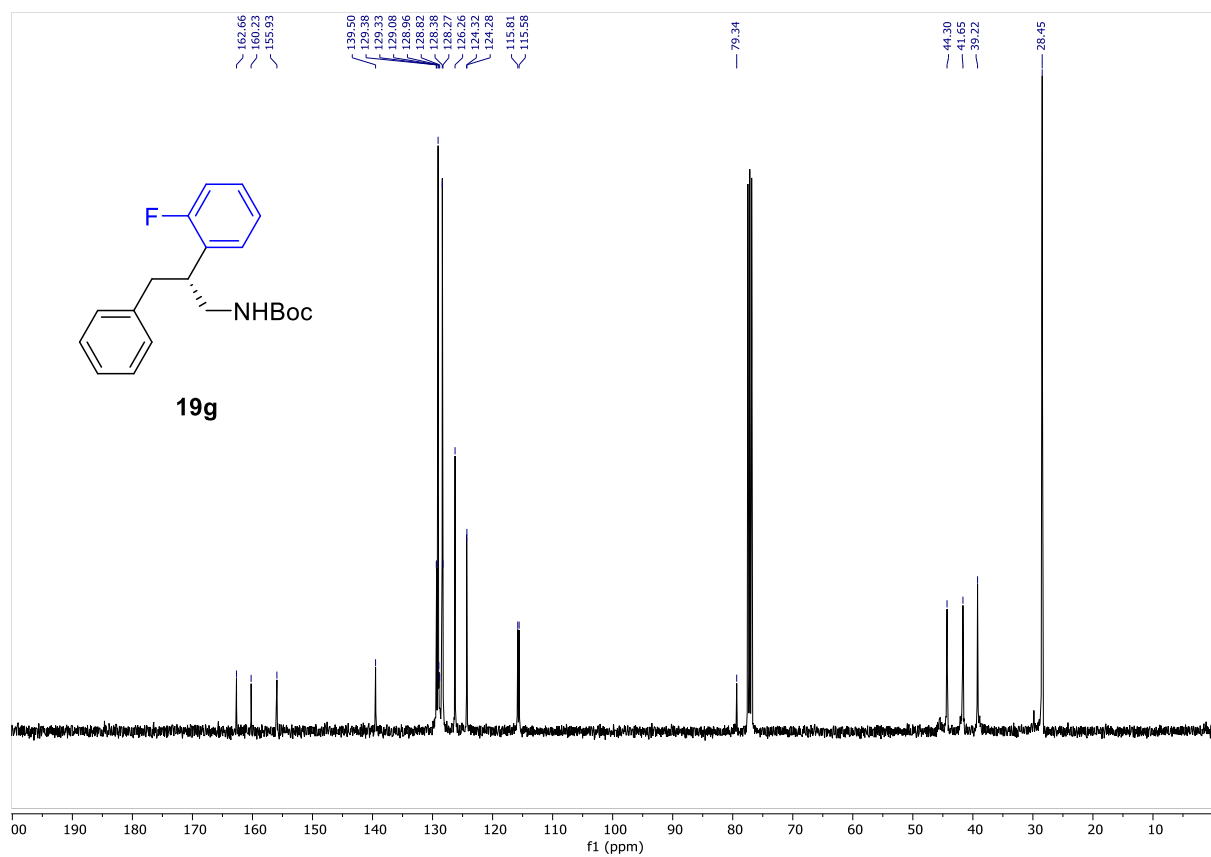

$^1\text{H-NMR}$  (400 MHz,  $\text{CDCl}_3$ ):

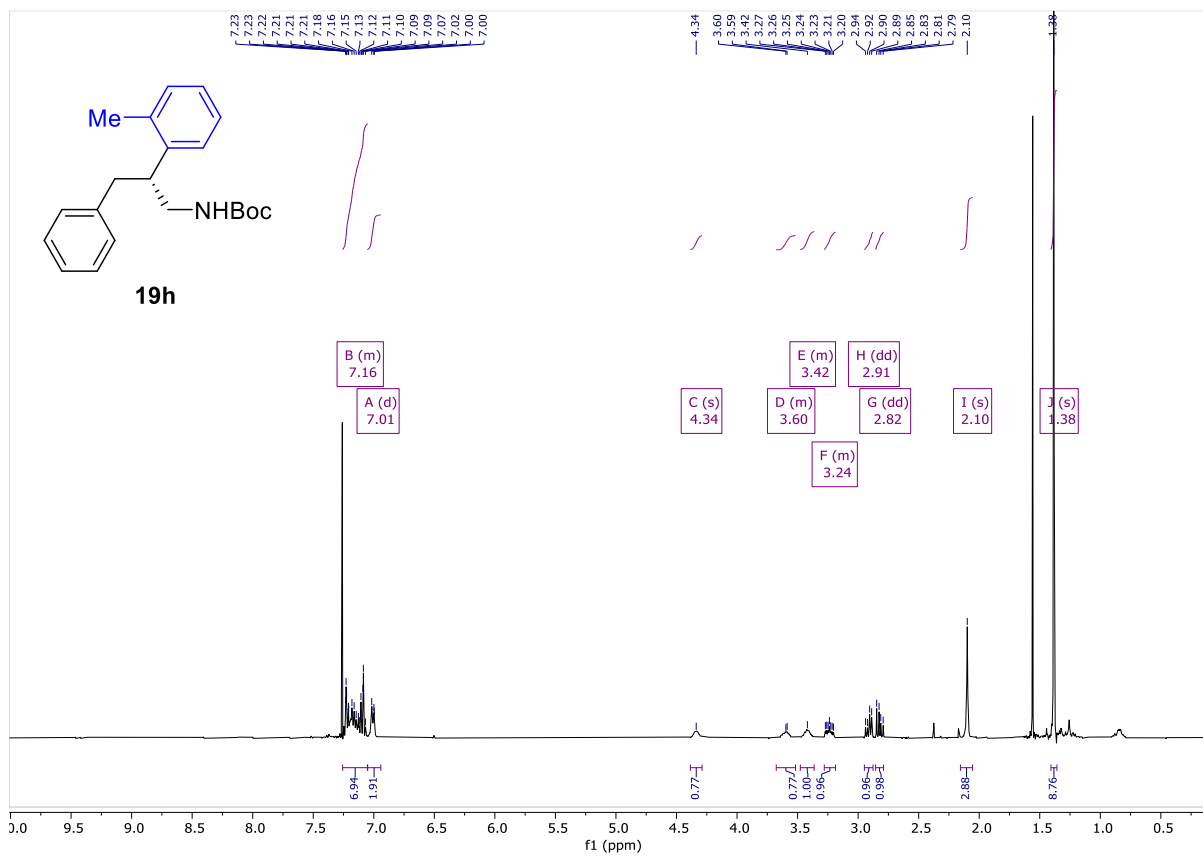

$^{13}\text{C-NMR}$  (101 MHz,  $\text{CDCl}_3$ ):

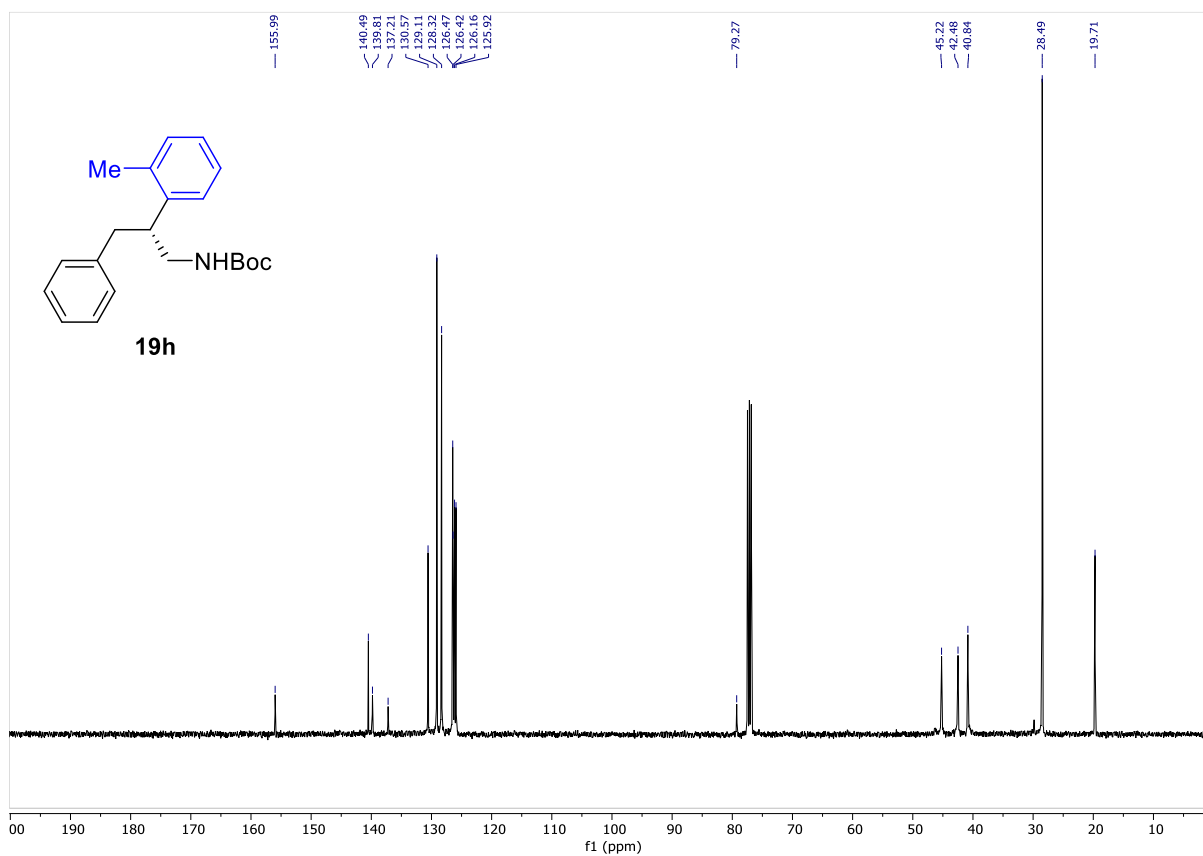

$^1\text{H-NMR}$  (400 MHz,  $\text{CDCl}_3$ ):

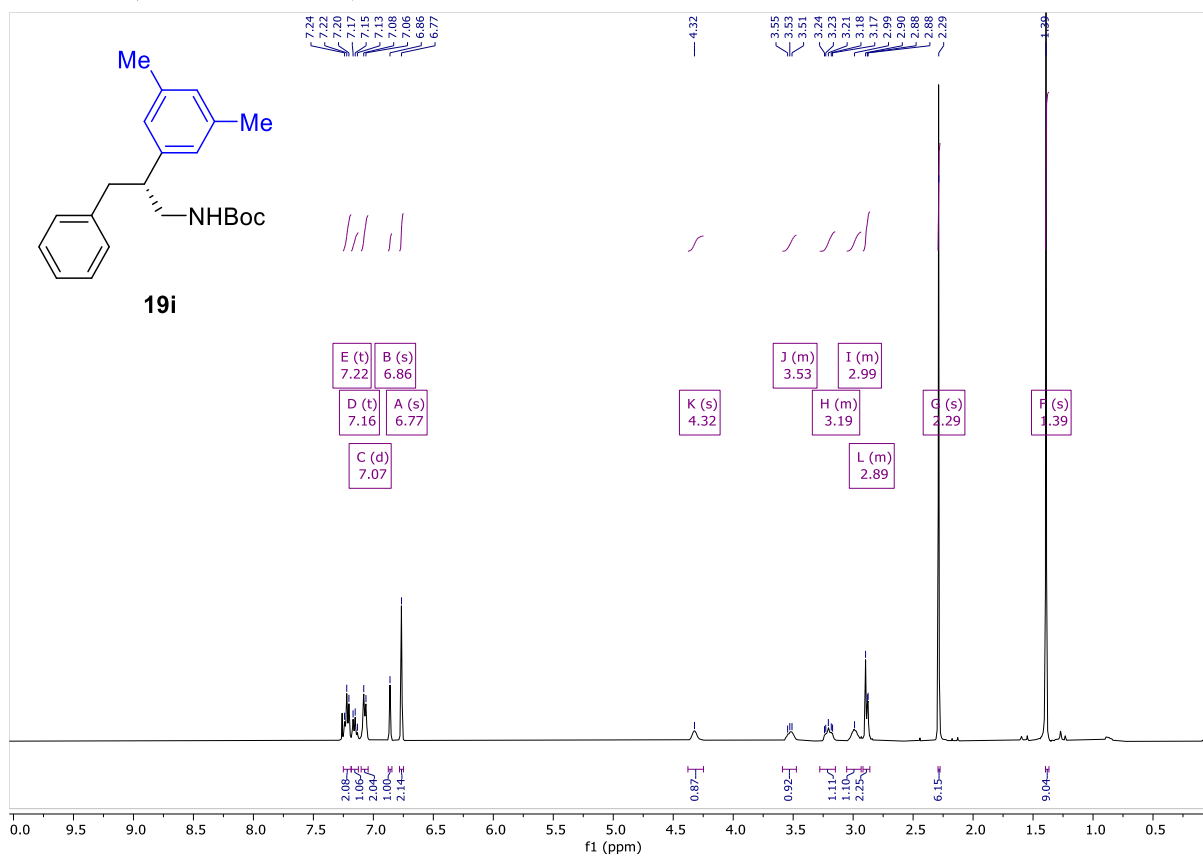

$^{13}\text{C-NMR}$  (101 MHz,  $\text{CDCl}_3$ ):

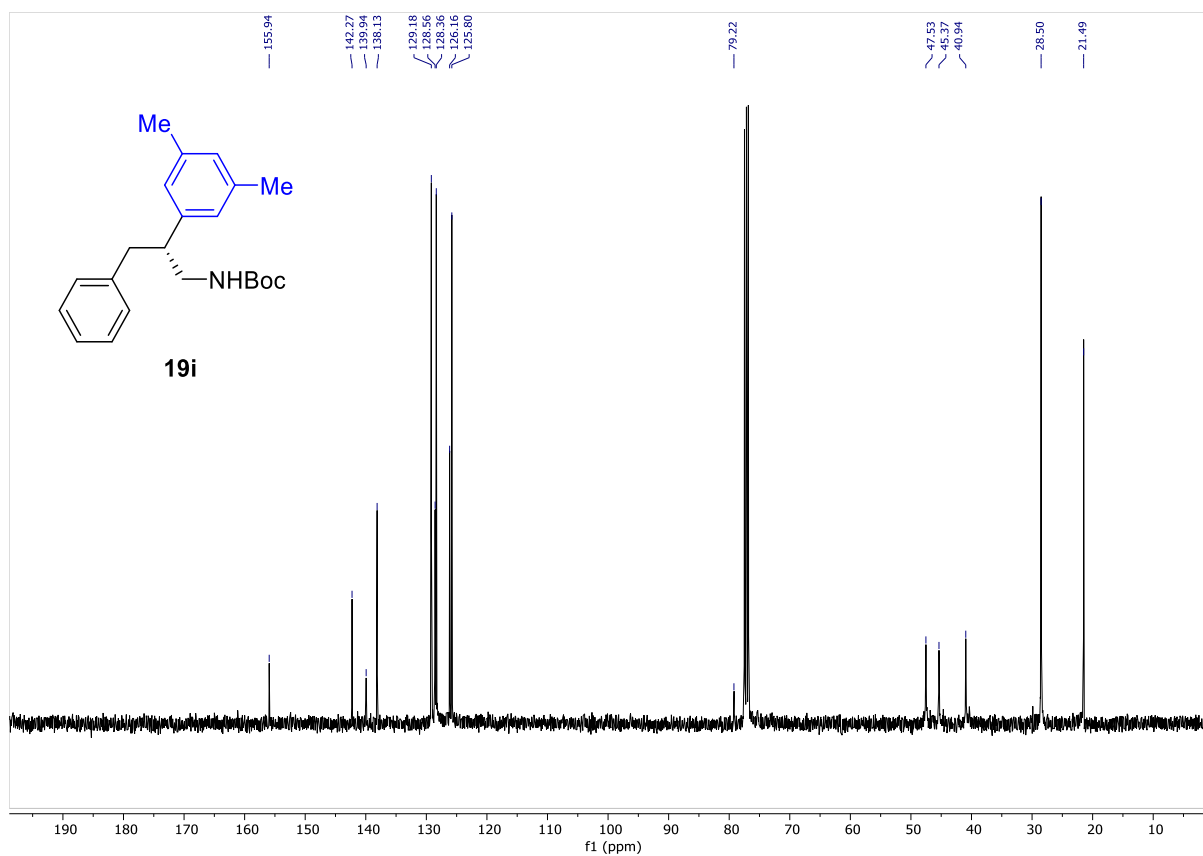



$^1\text{H-NMR}$  (400 MHz,  $\text{CDCl}_3$ ):

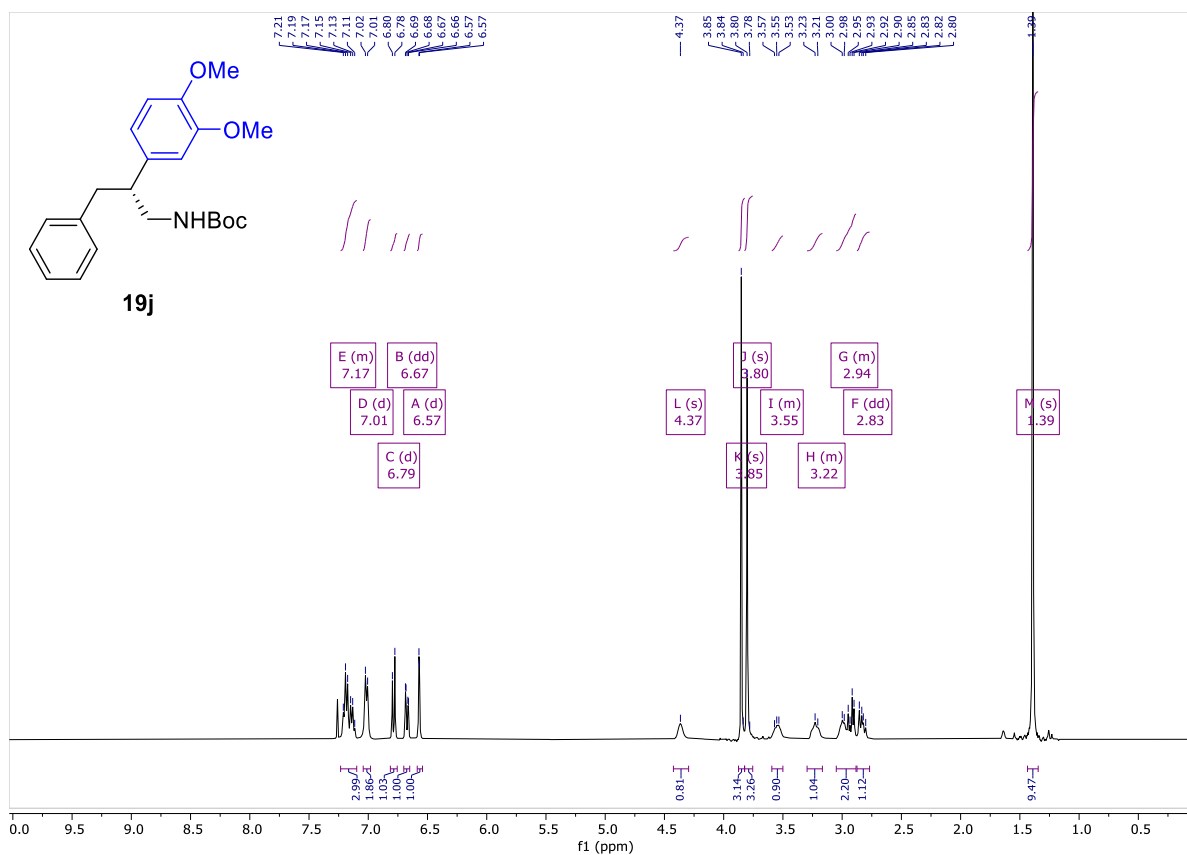

$^{13}\text{C-NMR}$  (101 MHz,  $\text{CDCl}_3$ ):

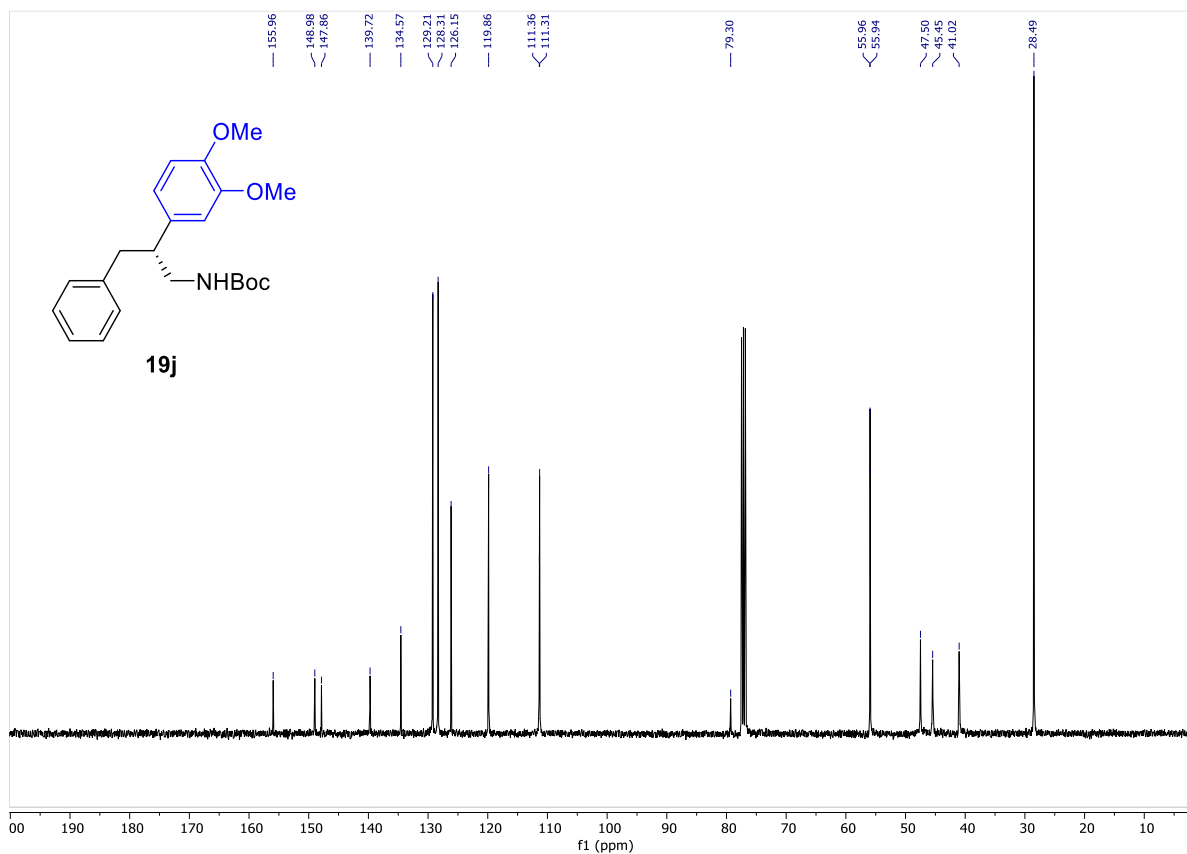

<sup>1</sup>H-NMR (400 MHz, CDCl<sub>3</sub>):

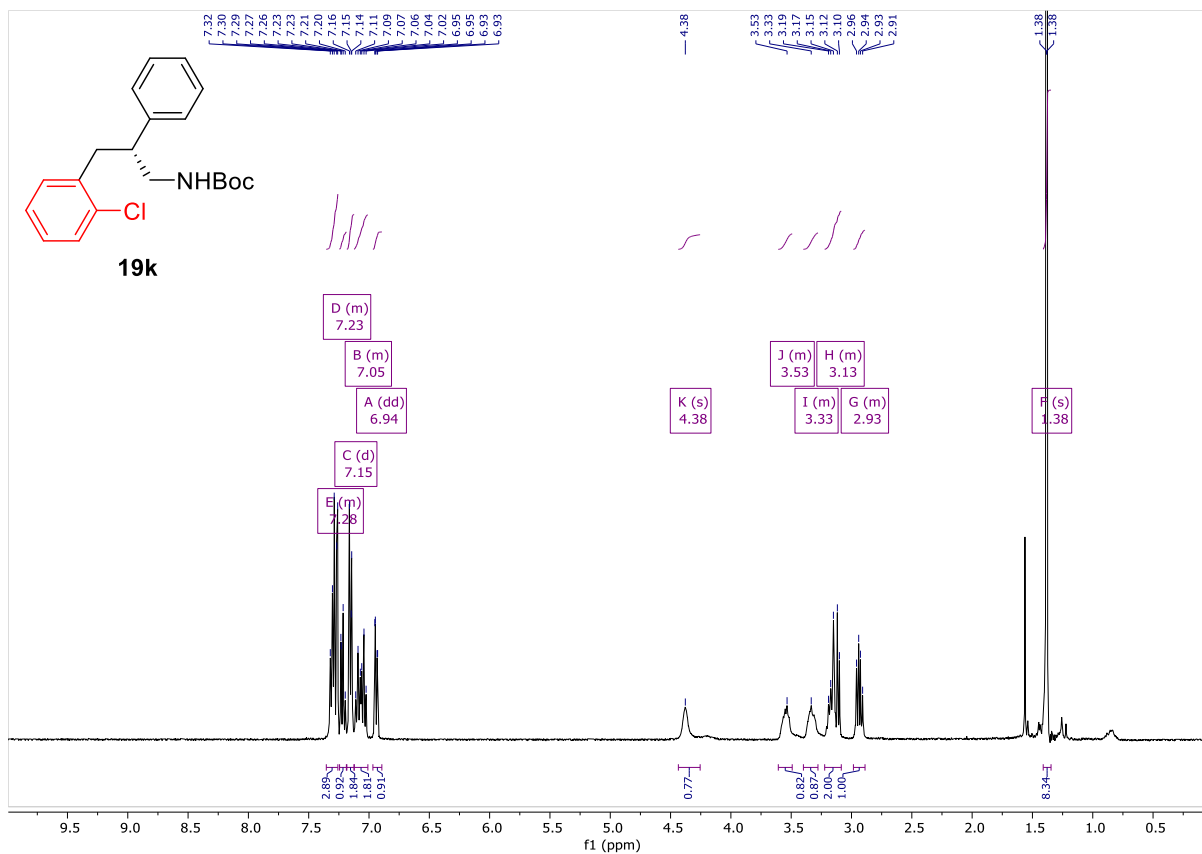

<sup>13</sup>C-NMR (101 MHz, CDCl<sub>3</sub>):

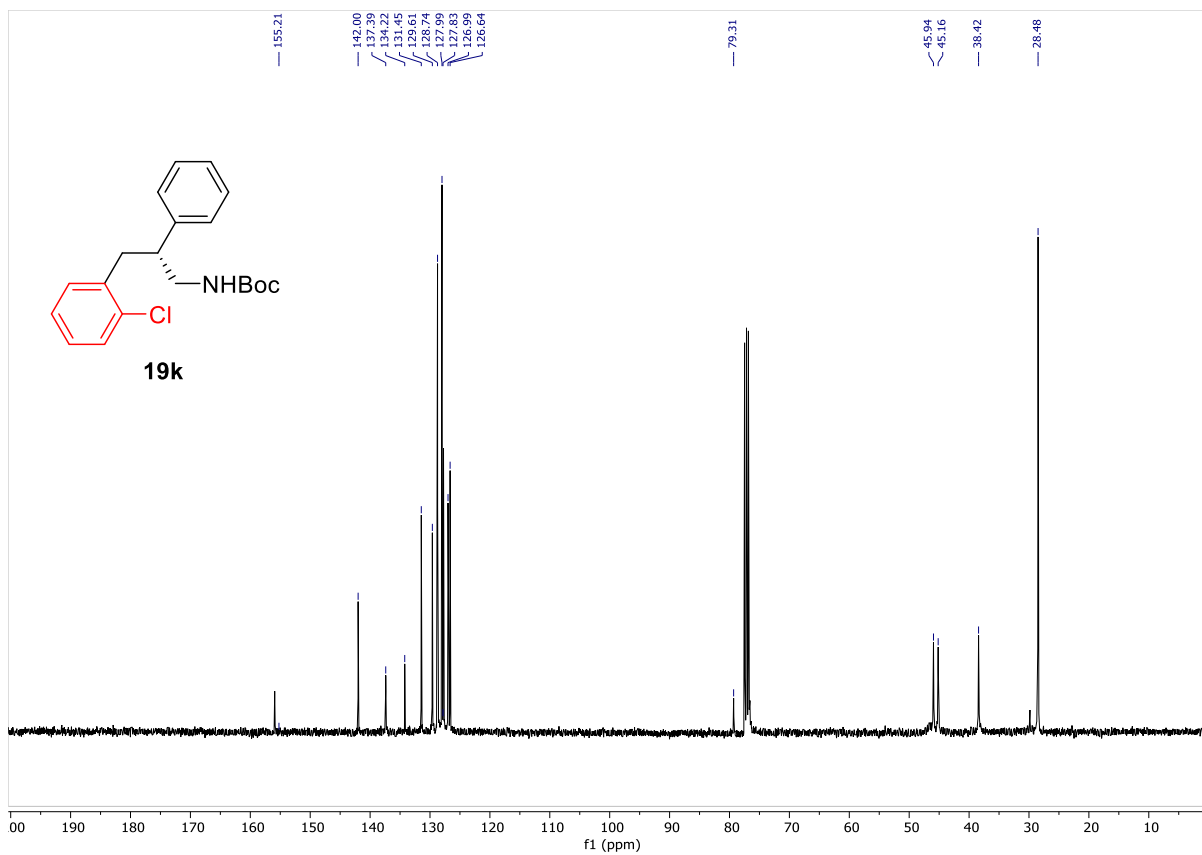

<sup>1</sup>H-NMR (400 MHz, CDCl<sub>3</sub>):

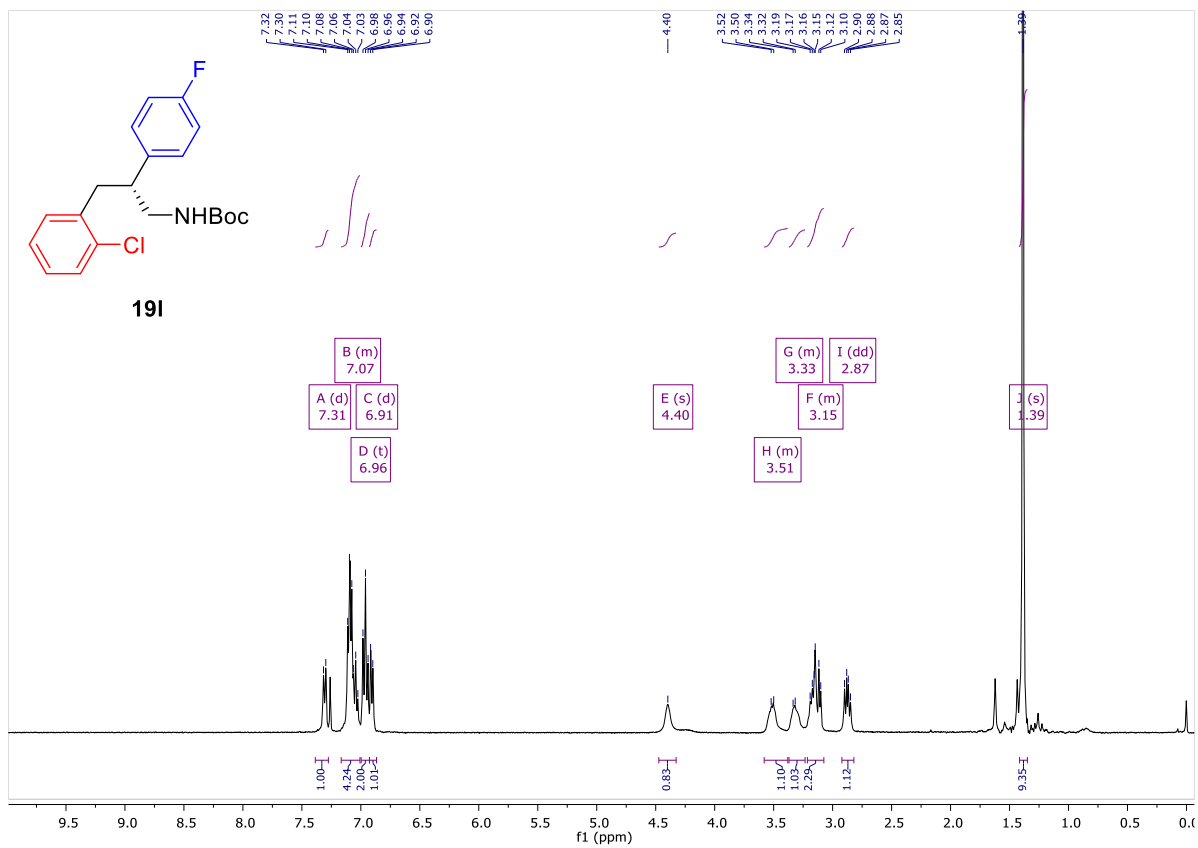

<sup>13</sup>C-NMR (101 MHz, CDCl<sub>3</sub>):

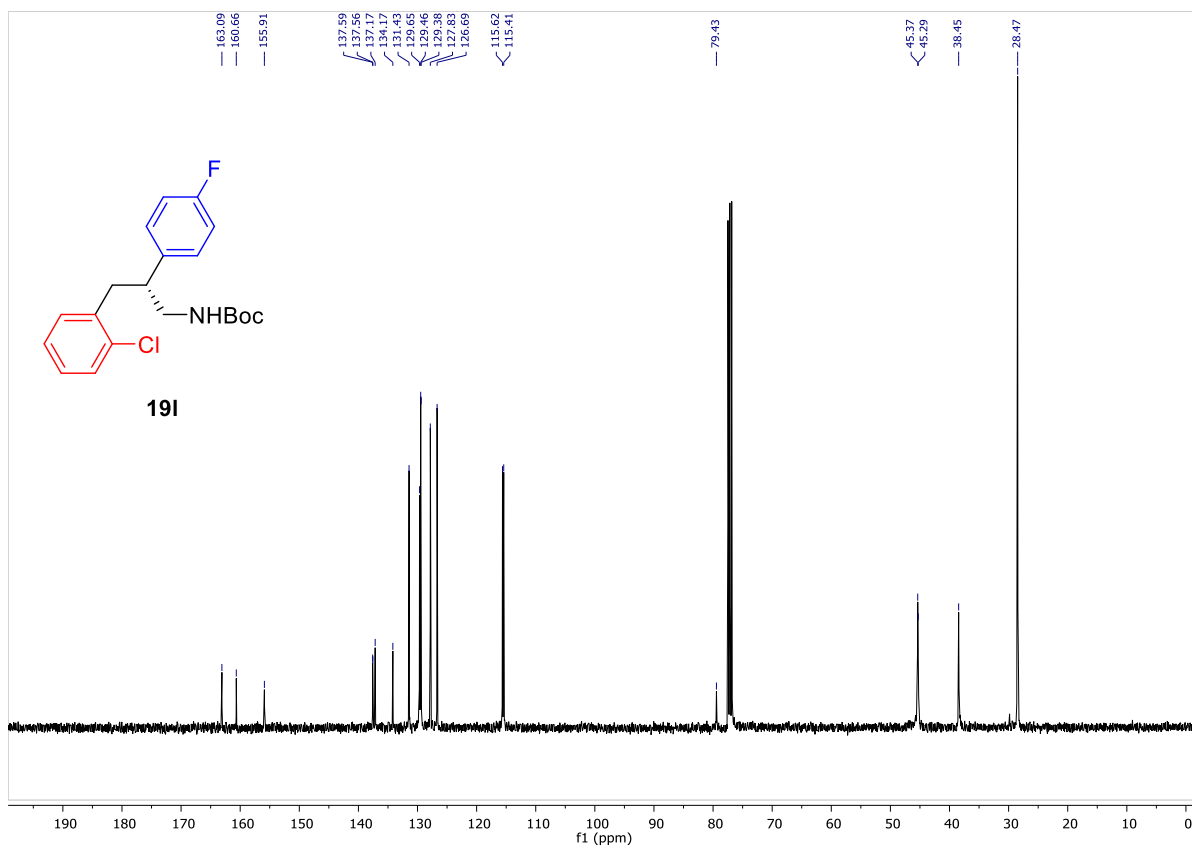

$^1\text{H-NMR}$  (400 MHz,  $\text{CDCl}_3$ ):

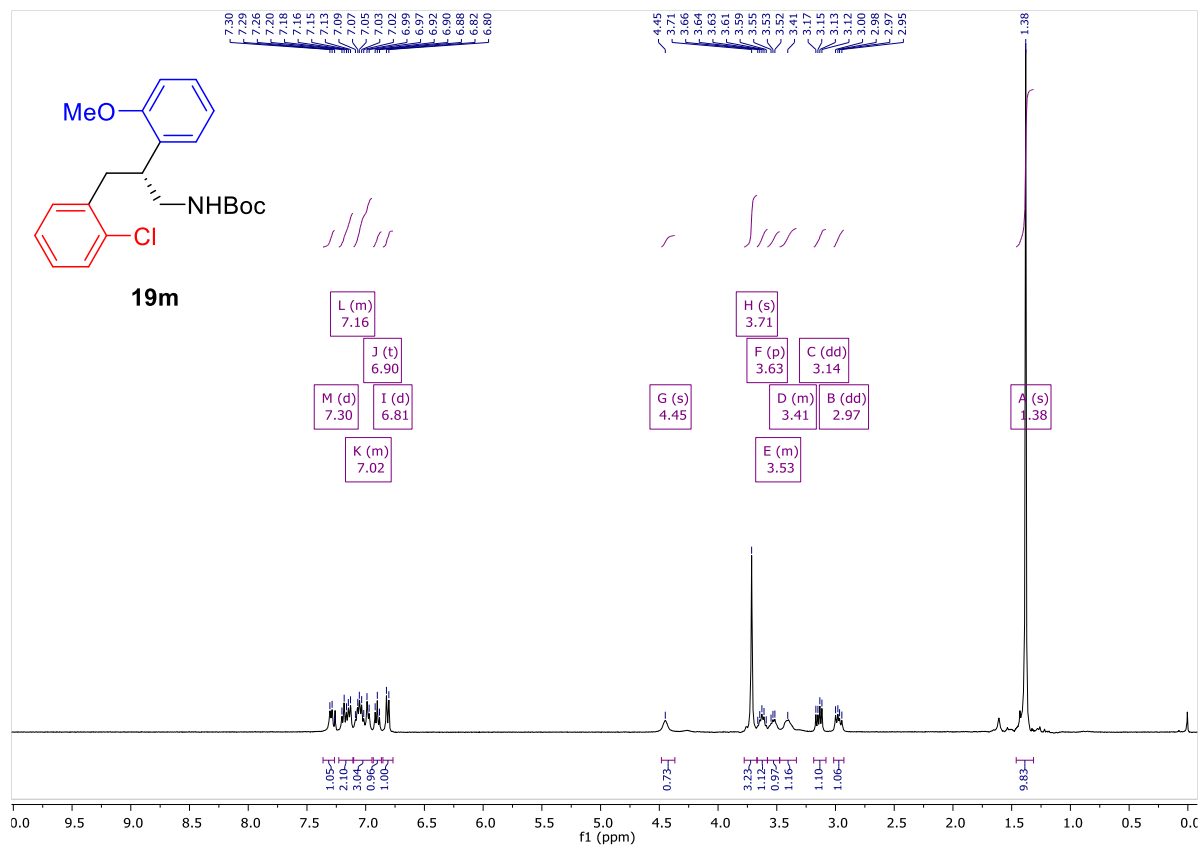

$^{13}\text{C-NMR}$  (101 MHz,  $\text{CDCl}_3$ ):

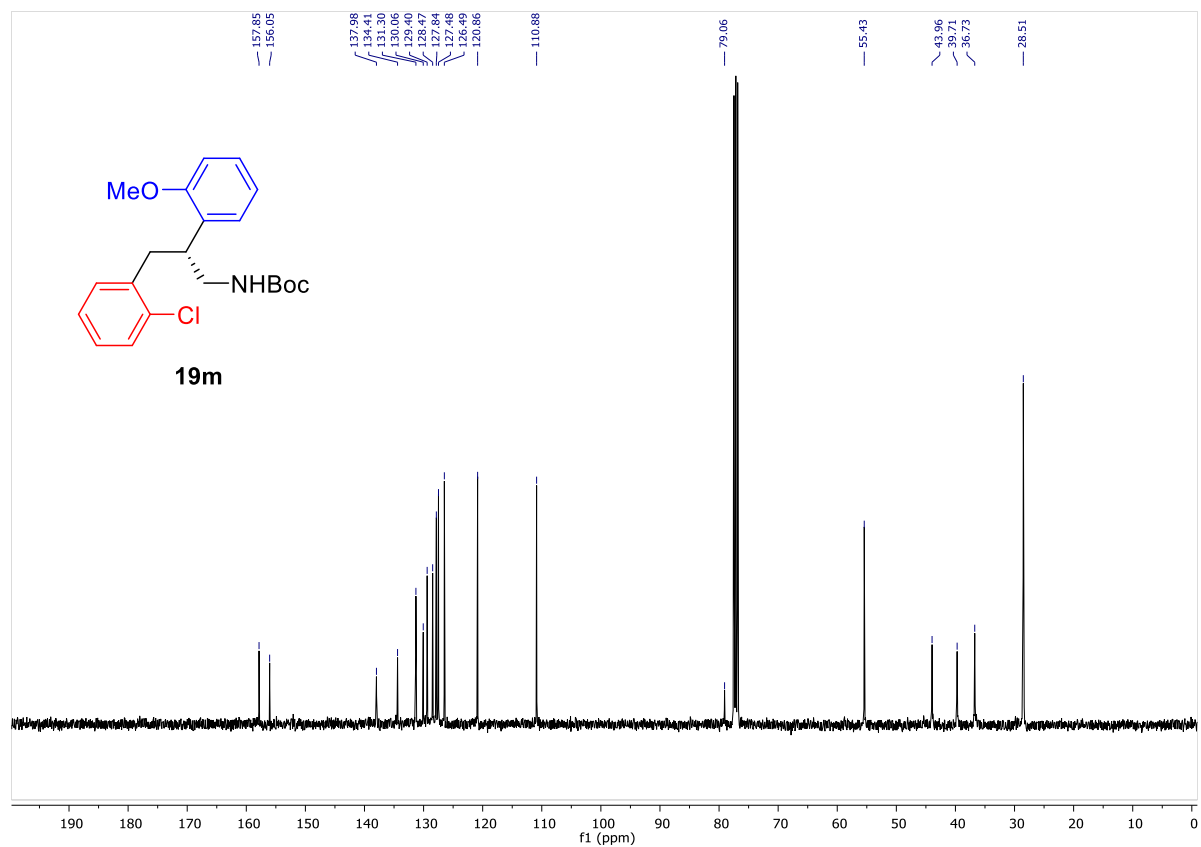

$^1\text{H-NMR}$  (400 MHz,  $\text{CDCl}_3$ ):

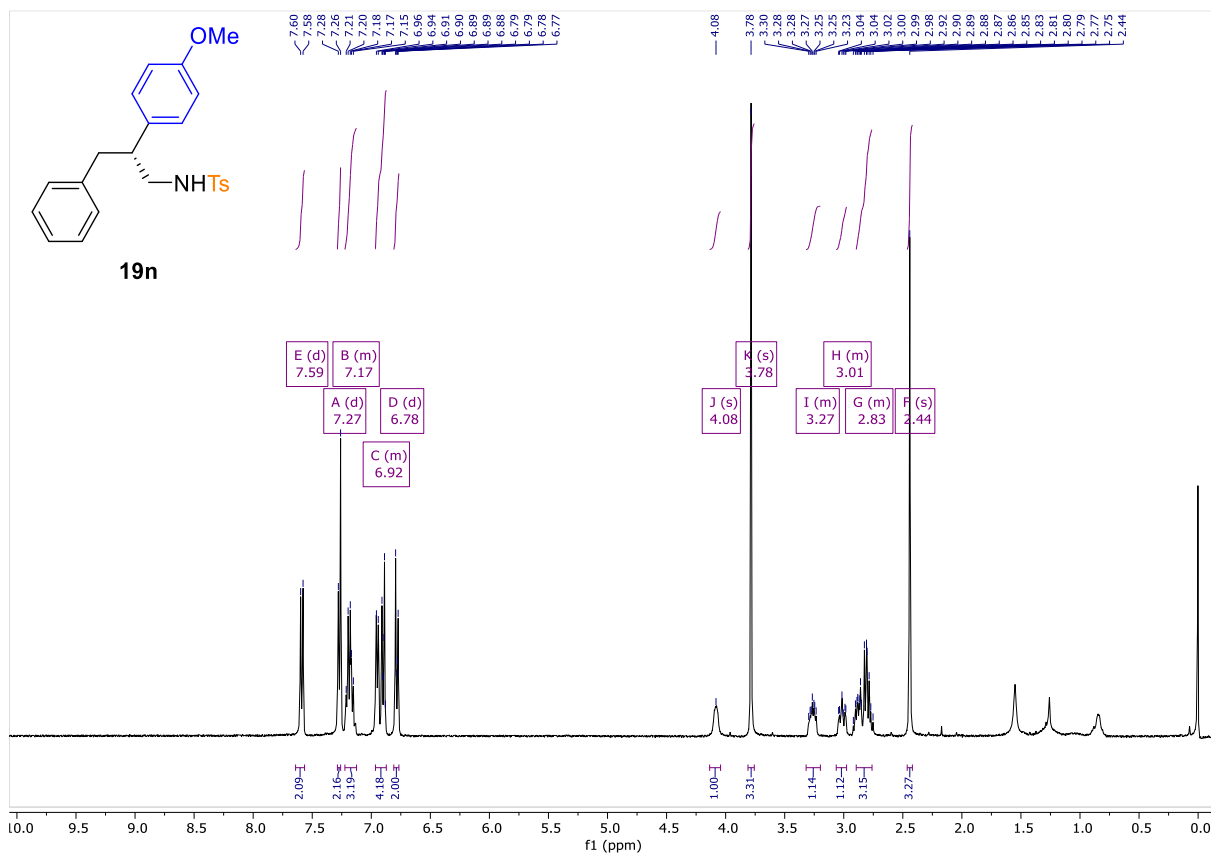

$^{13}\text{C-NMR}$  (101 MHz,  $\text{CDCl}_3$ ):

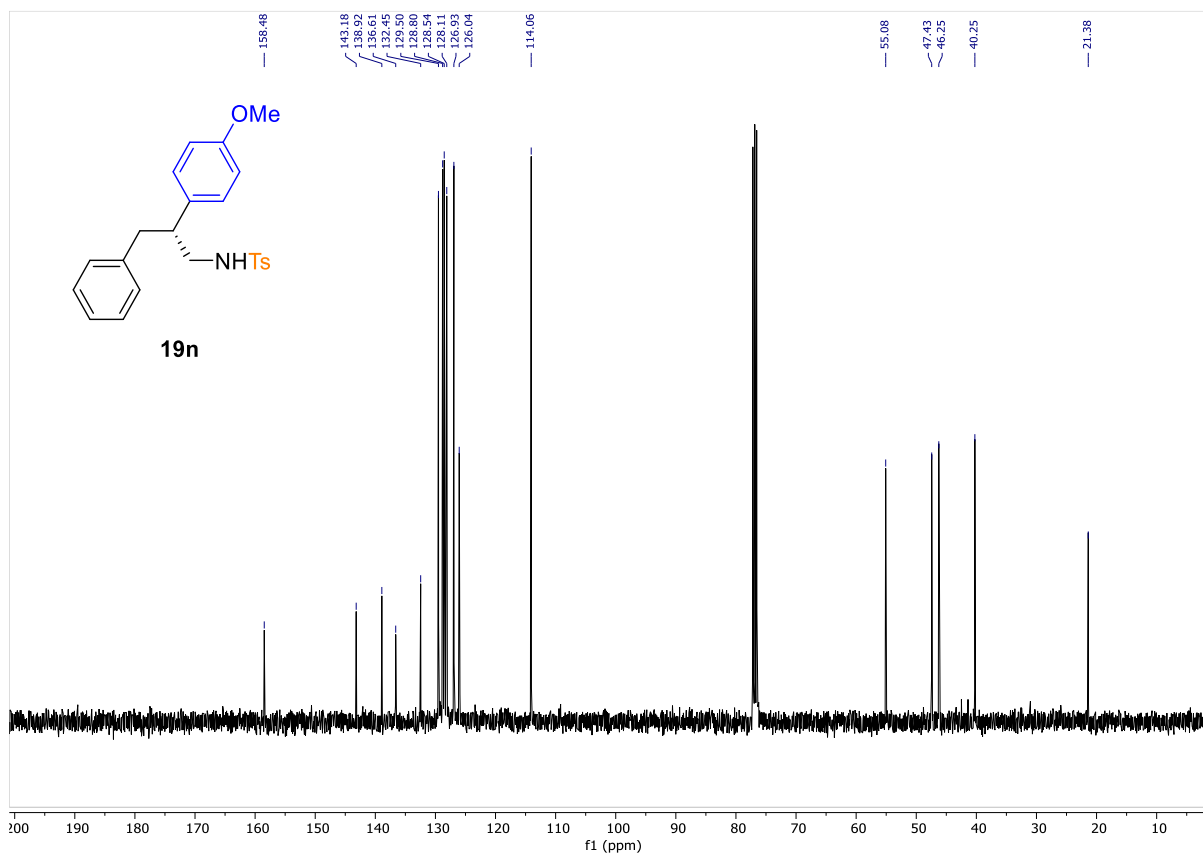

$^1\text{H-NMR}$  (400 MHz,  $\text{CDCl}_3$ ):

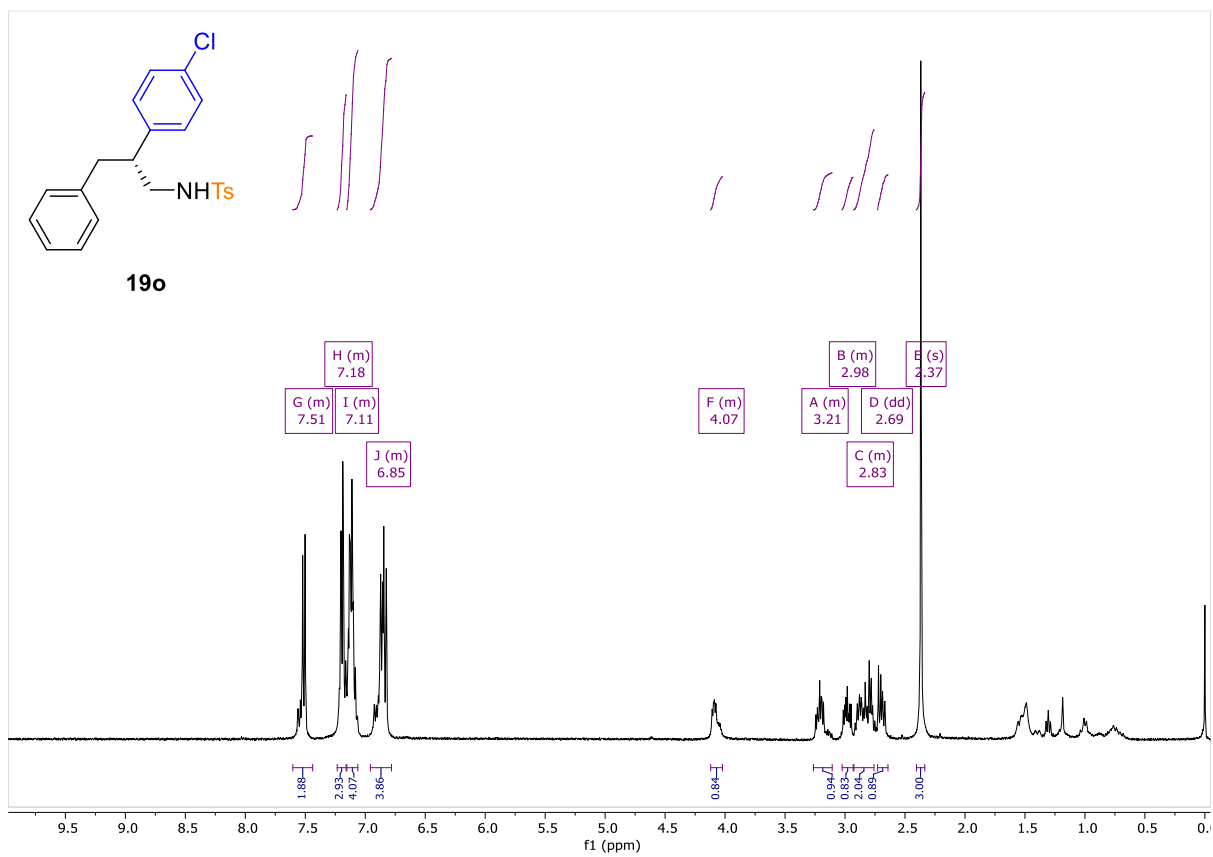

$^{13}\text{C-NMR}$  (101 MHz,  $\text{CDCl}_3$ ):

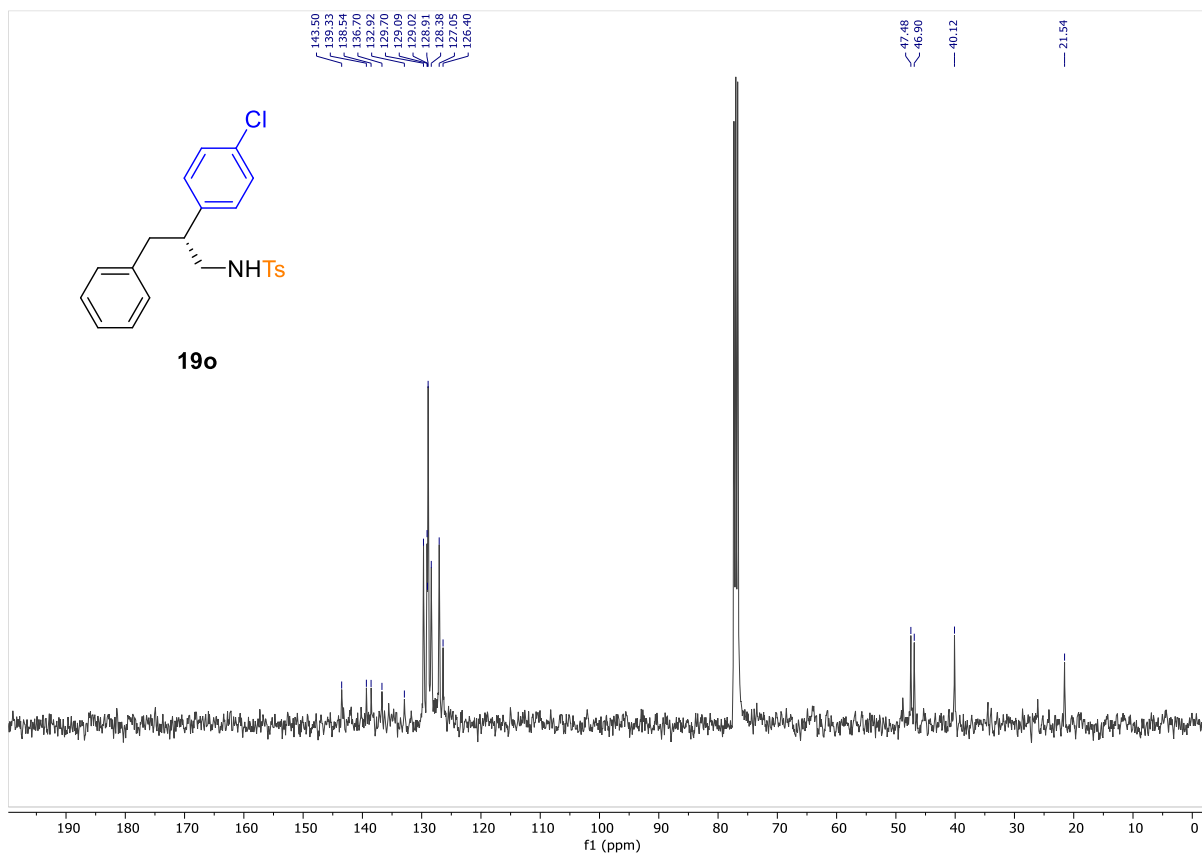

<sup>1</sup>H-NMR (400 MHz, CDCl<sub>3</sub>):

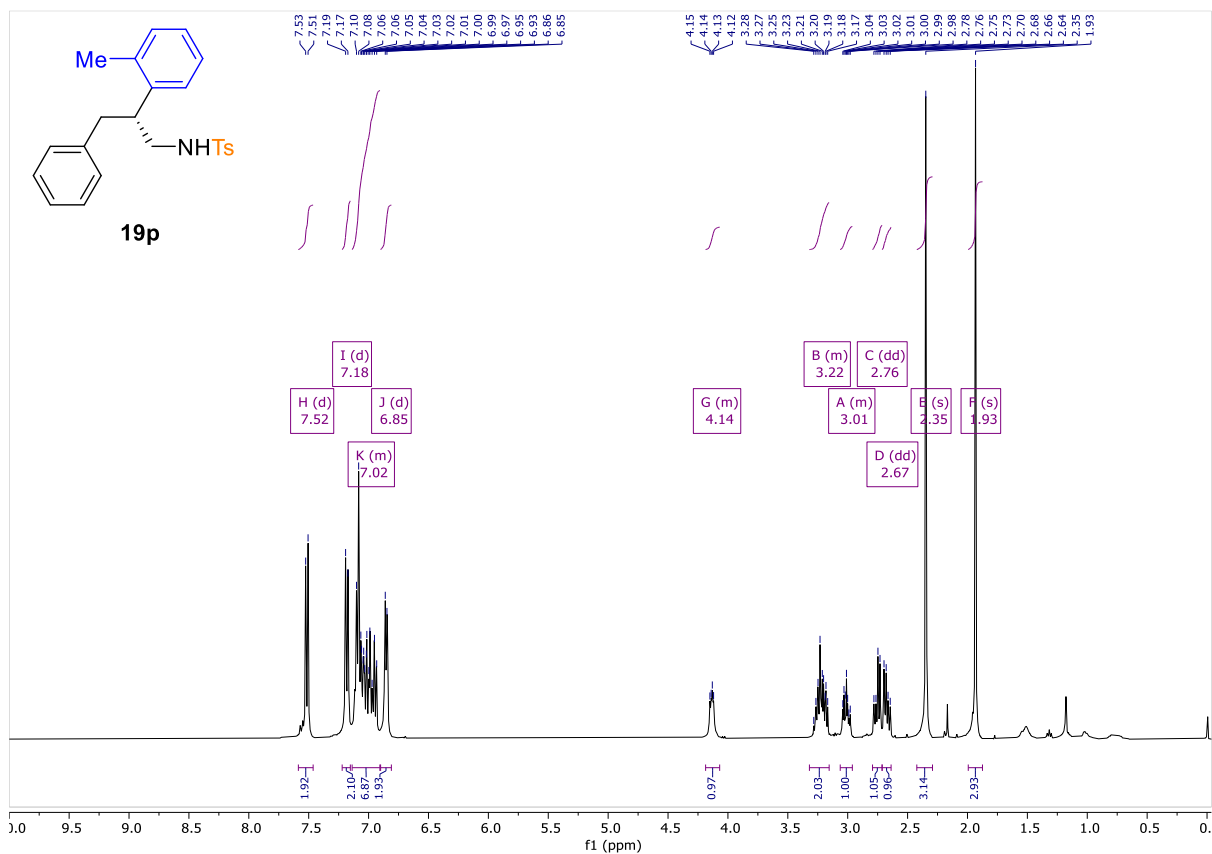

<sup>13</sup>C-NMR (101 MHz, CDCl<sub>3</sub>):

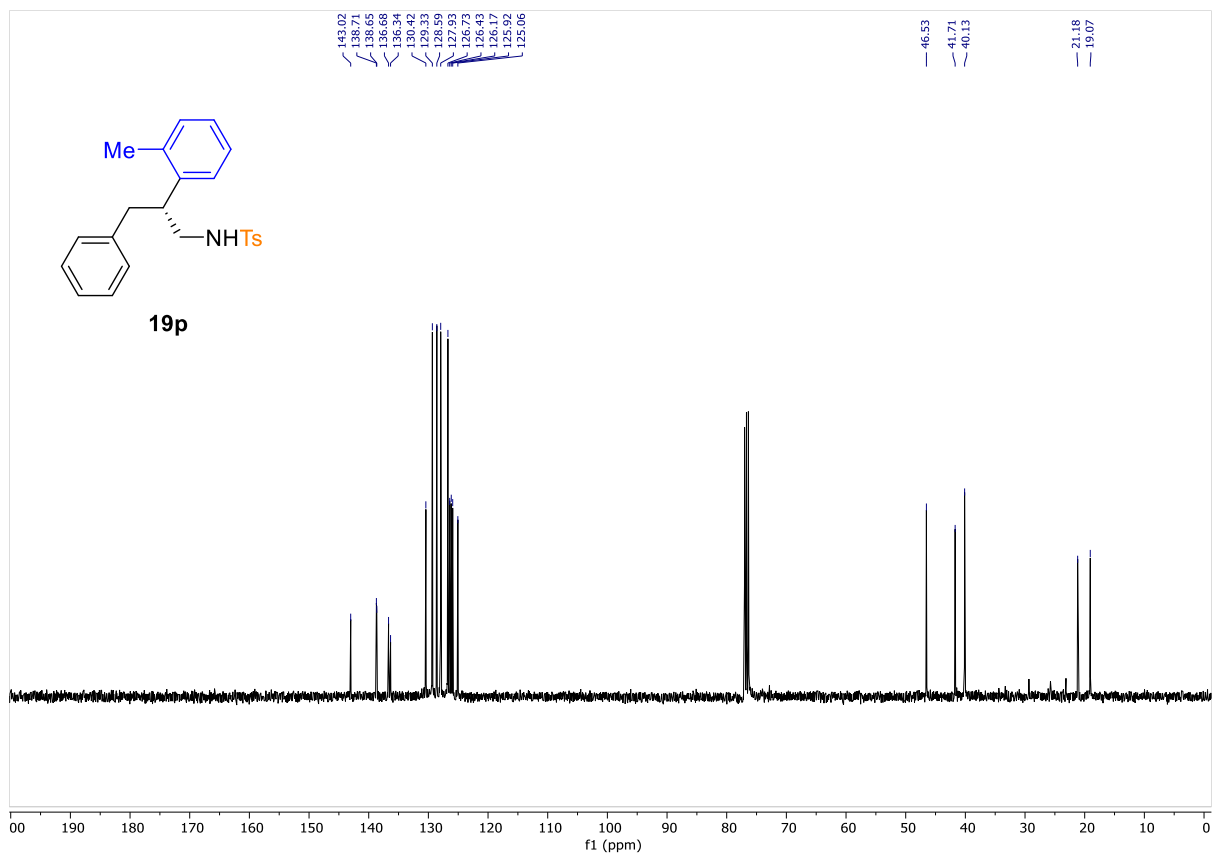

<sup>1</sup>H-NMR (400 MHz, CDCl<sub>3</sub>):

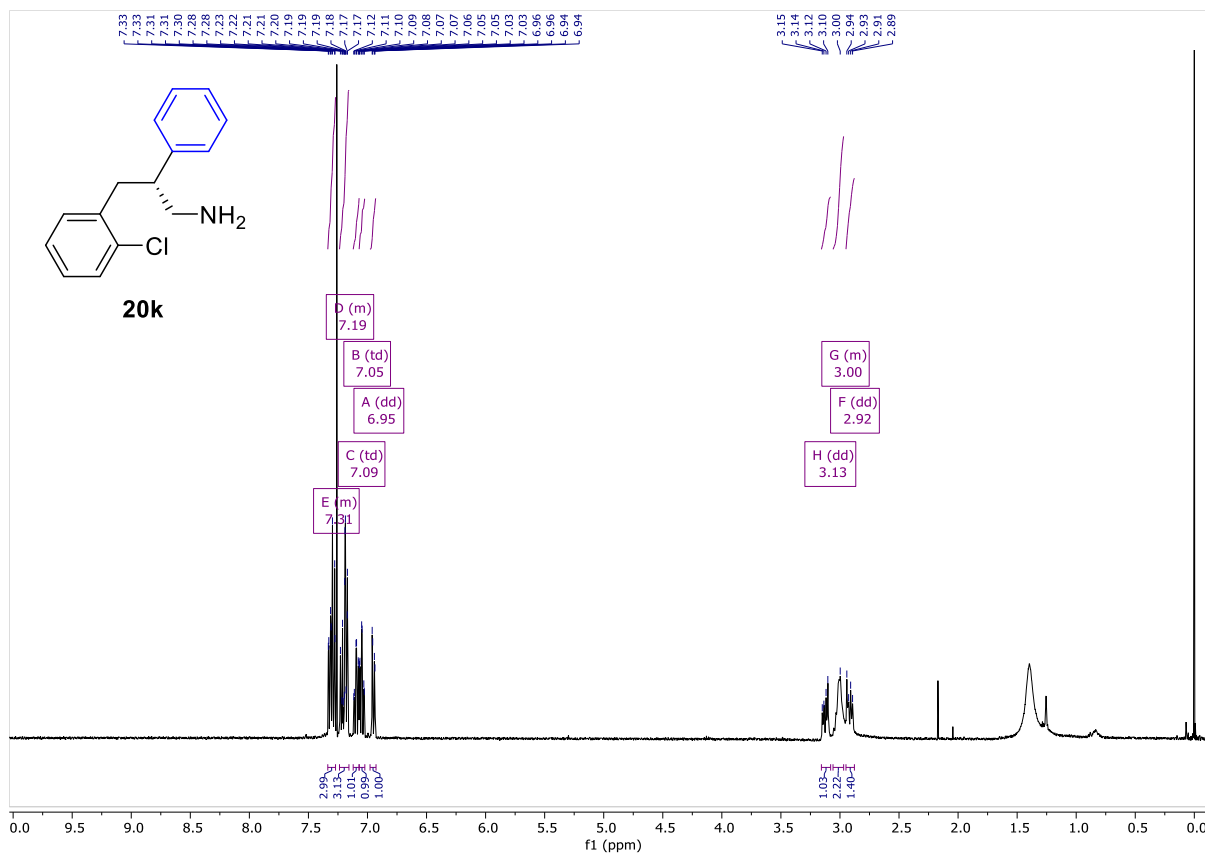

<sup>13</sup>C-NMR (101 MHz, CDCl<sub>3</sub>):

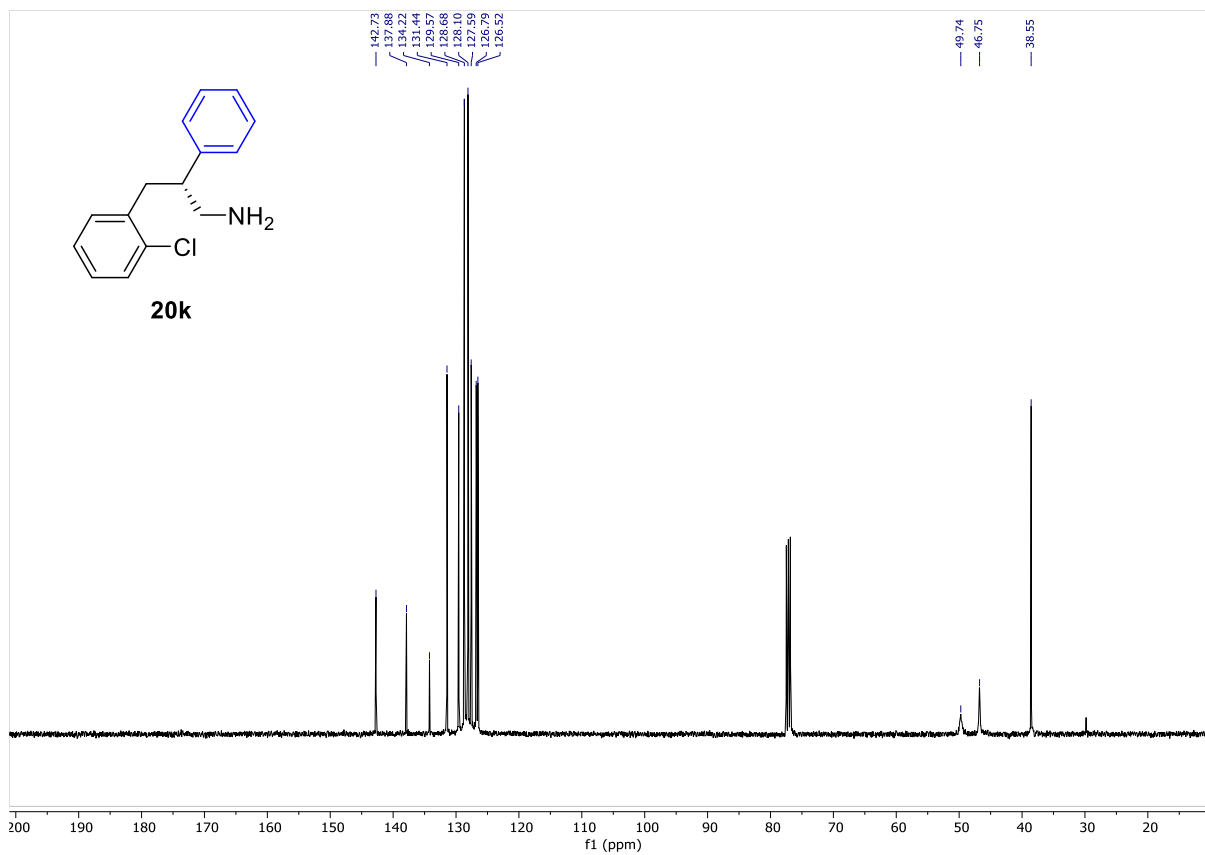



$^1\text{H-NMR}$  (400 MHz,  $\text{CDCl}_3$ ):

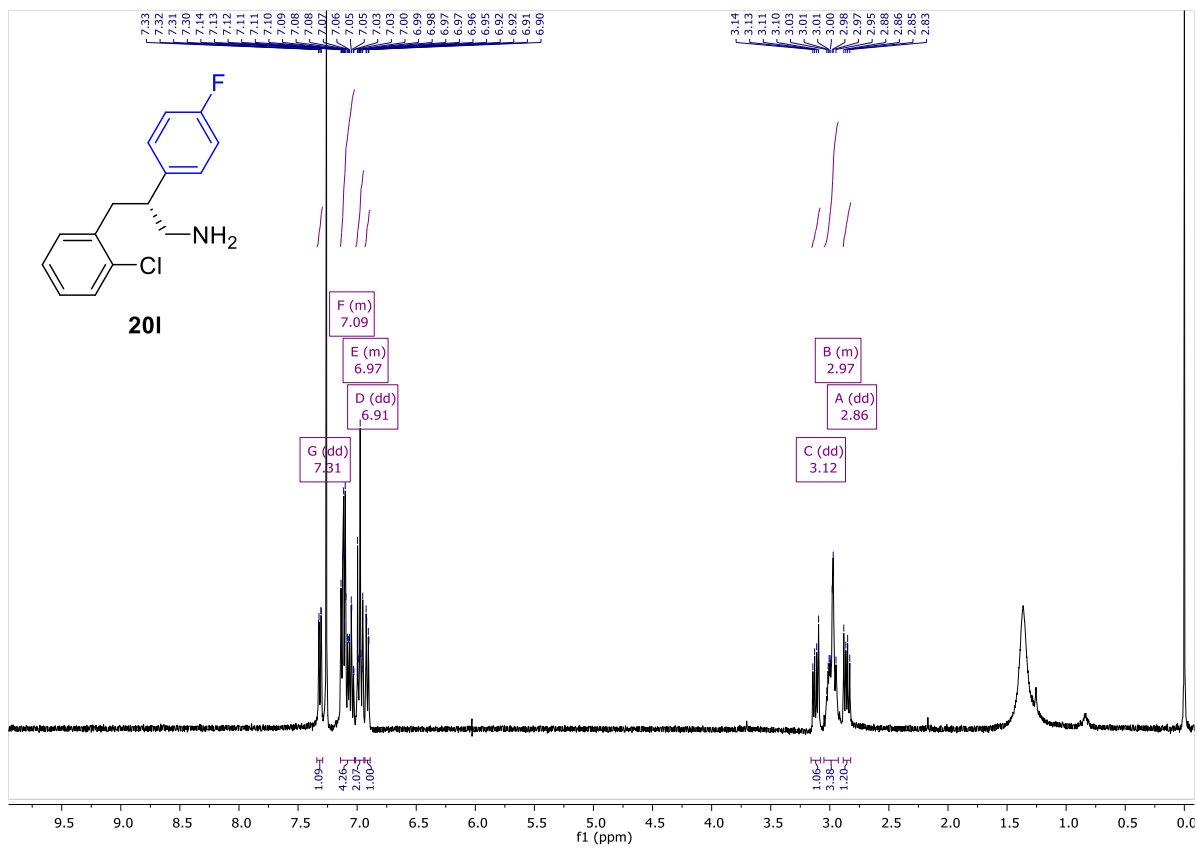

$^{13}\text{C-NMR}$  (101 MHz,  $\text{CDCl}_3$ ):

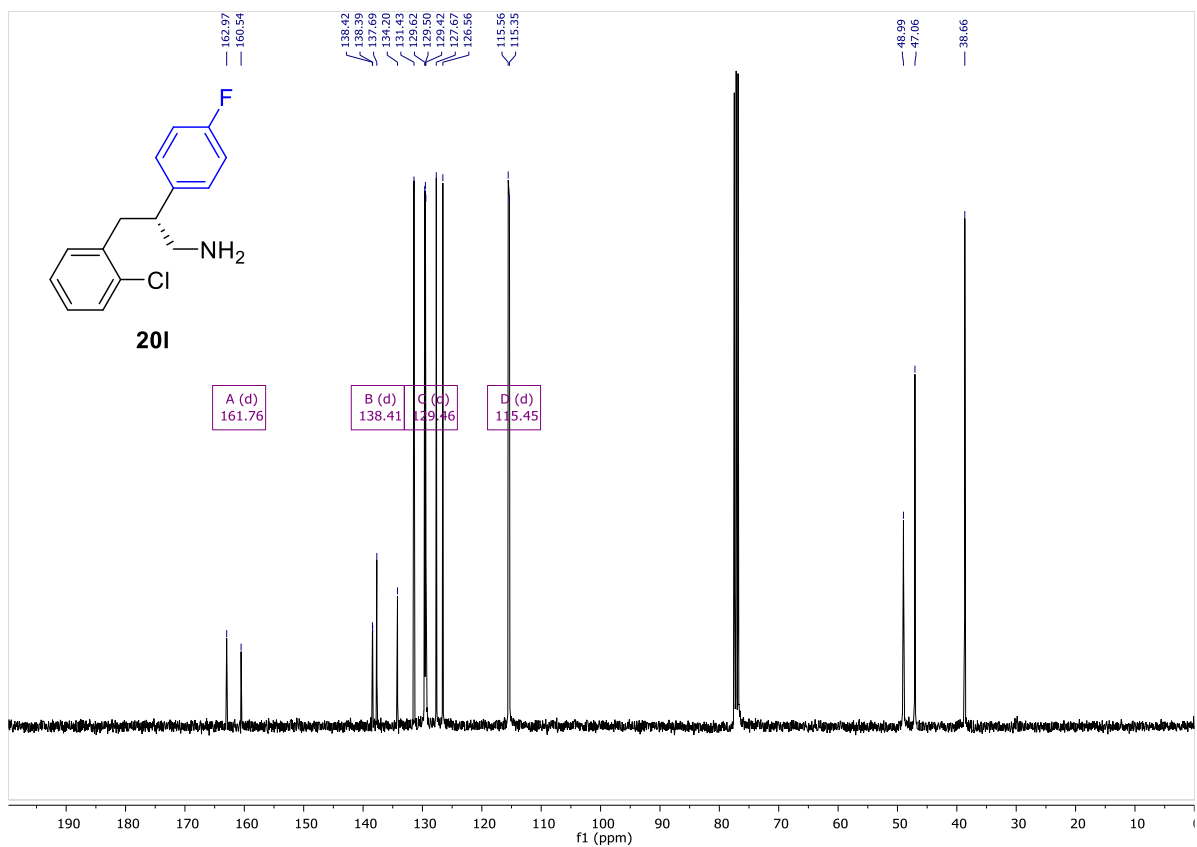

<sup>1</sup>H-NMR (400 MHz, CDCl<sub>3</sub>):

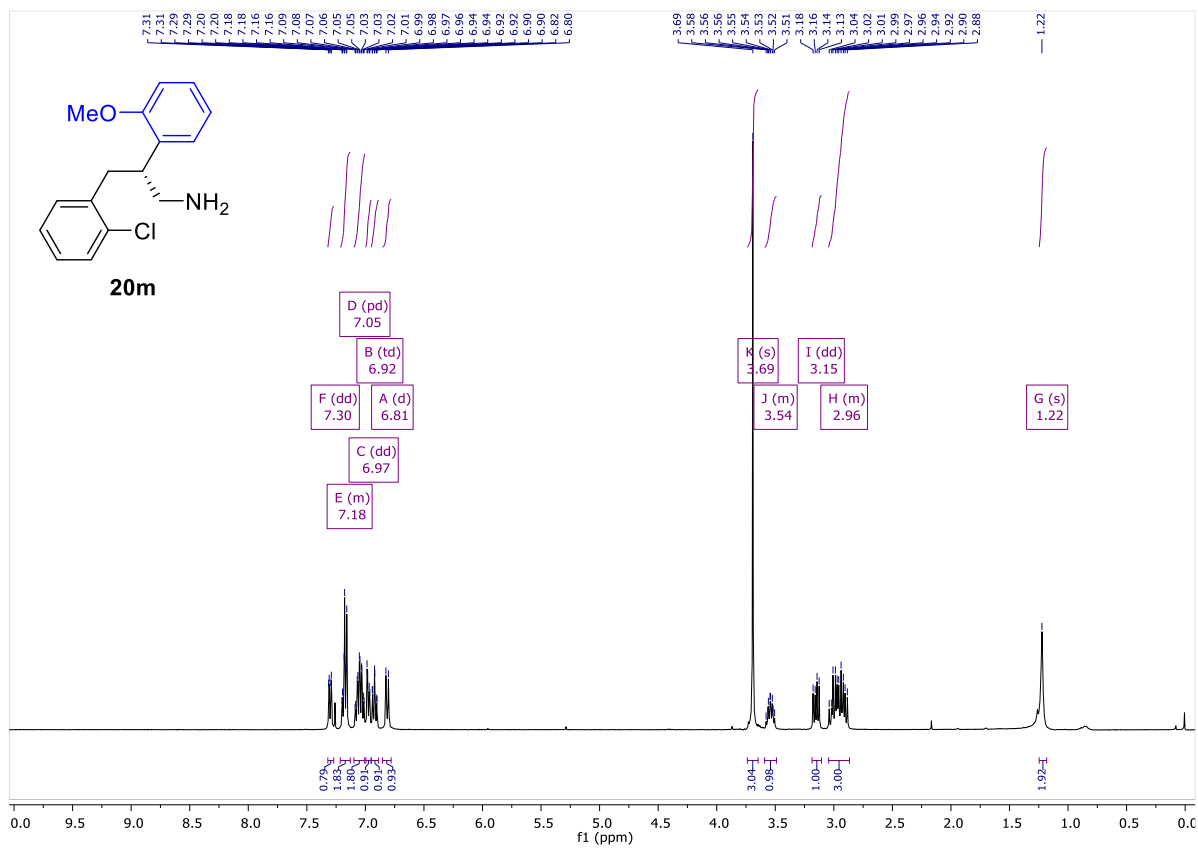

<sup>13</sup>C-NMR (101 MHz, CDCl<sub>3</sub>):

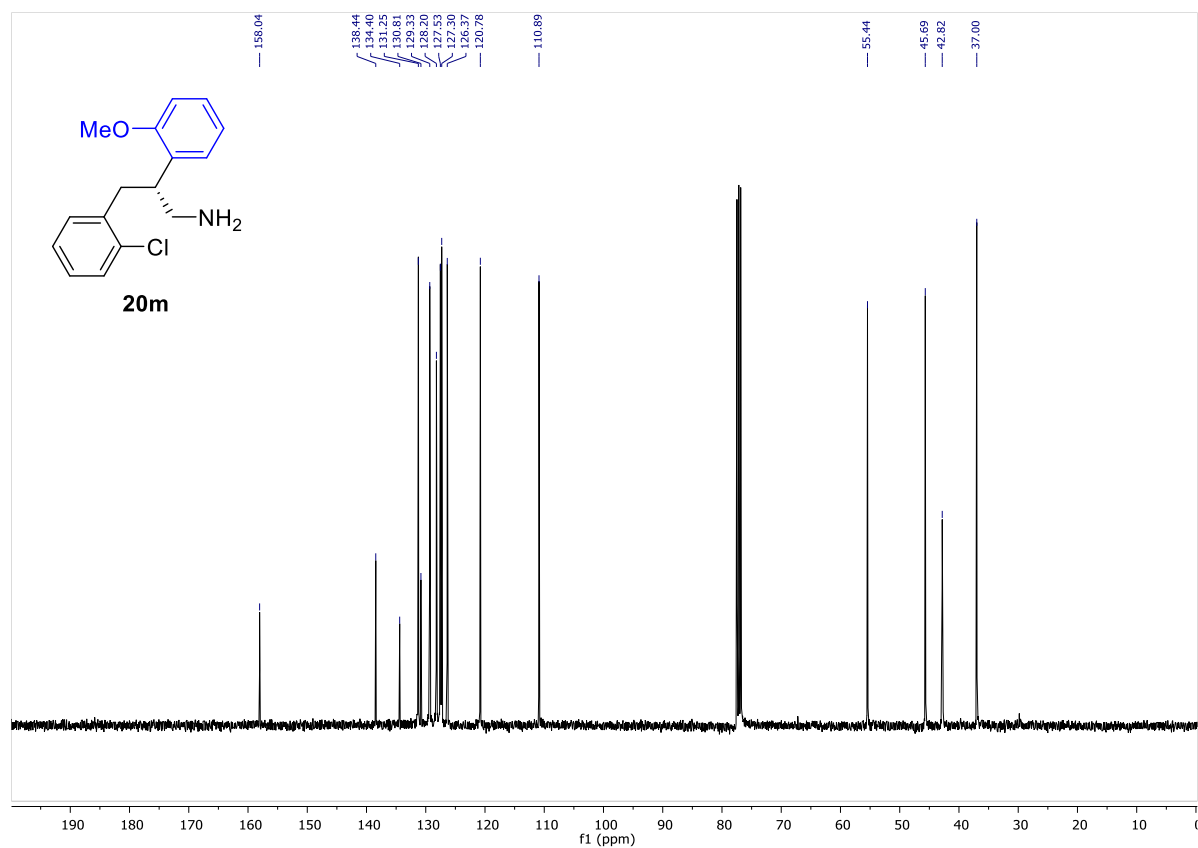

$^1\text{H-NMR}$  (400 MHz,  $\text{CDCl}_3$ ):

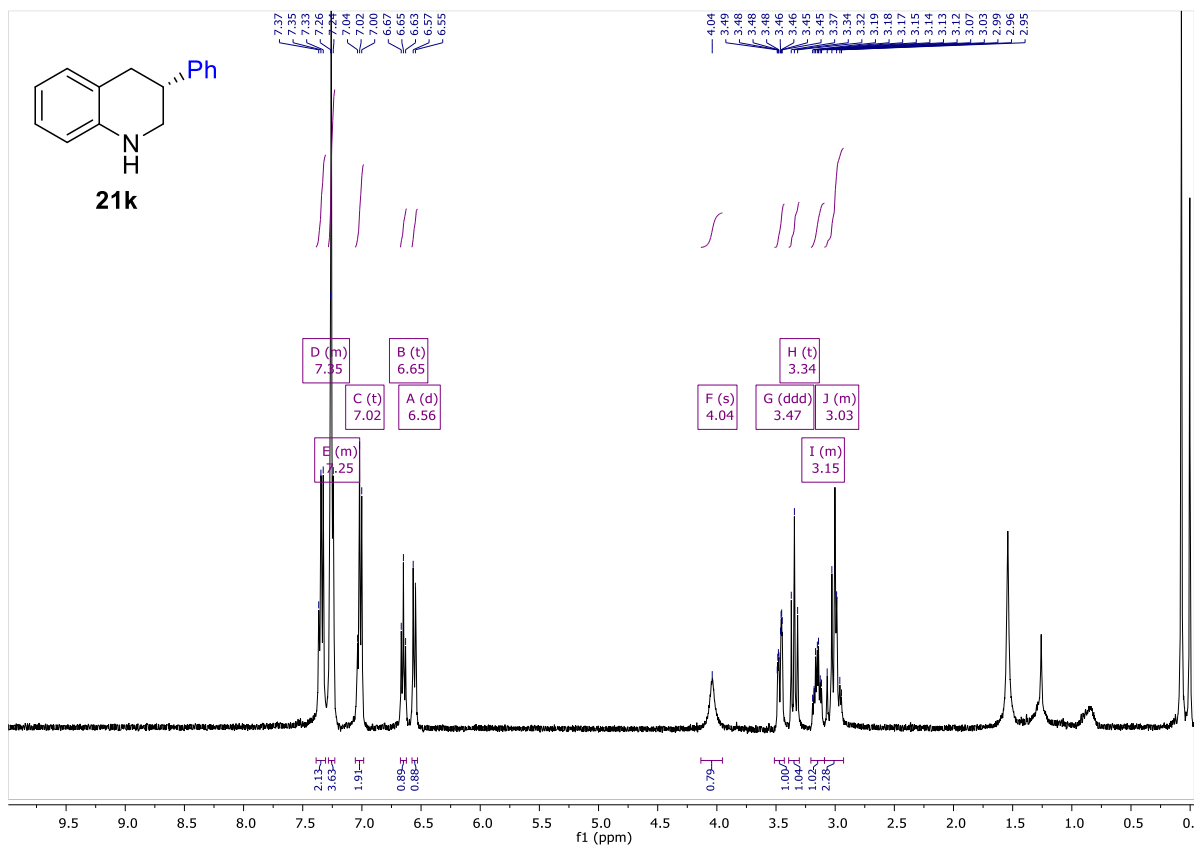

$^{13}\text{C-NMR}$  (101 MHz,  $\text{CDCl}_3$ ):

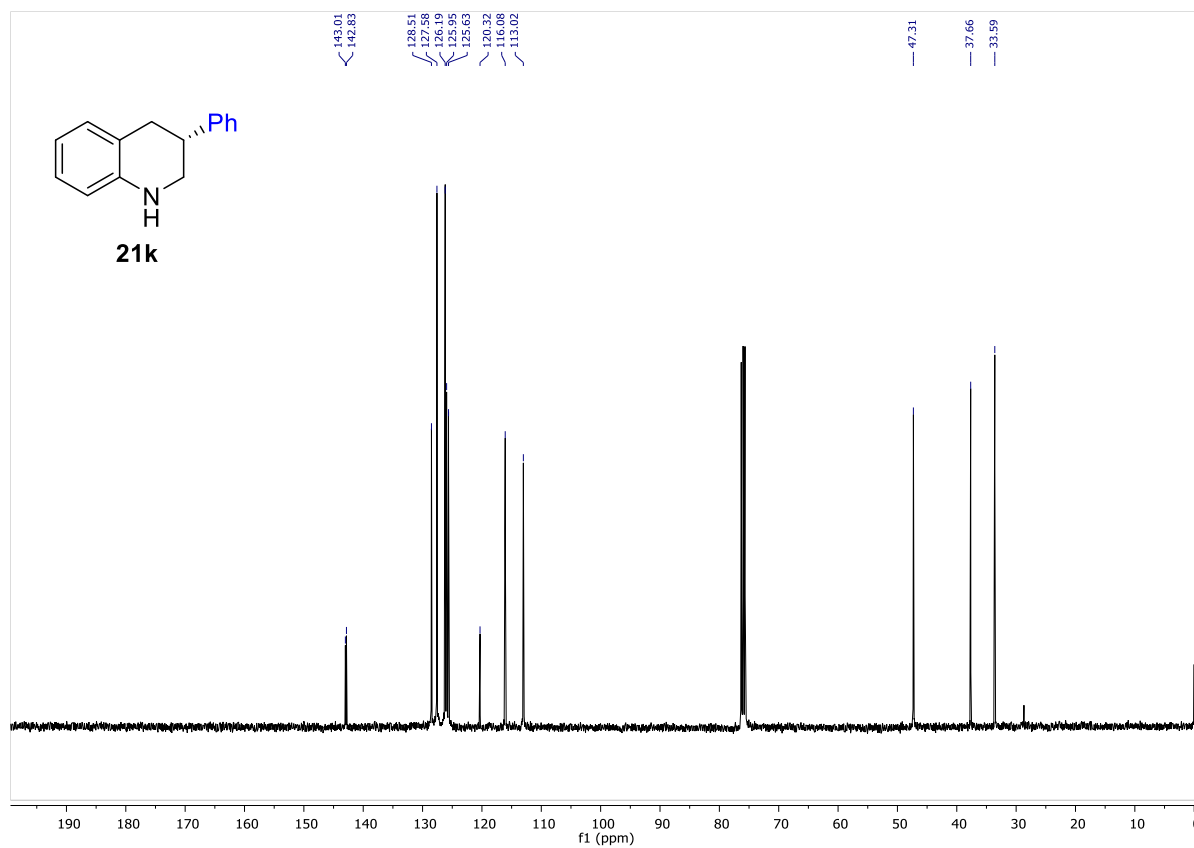

$^1\text{H-NMR}$  (400 MHz,  $\text{CDCl}_3$ ):

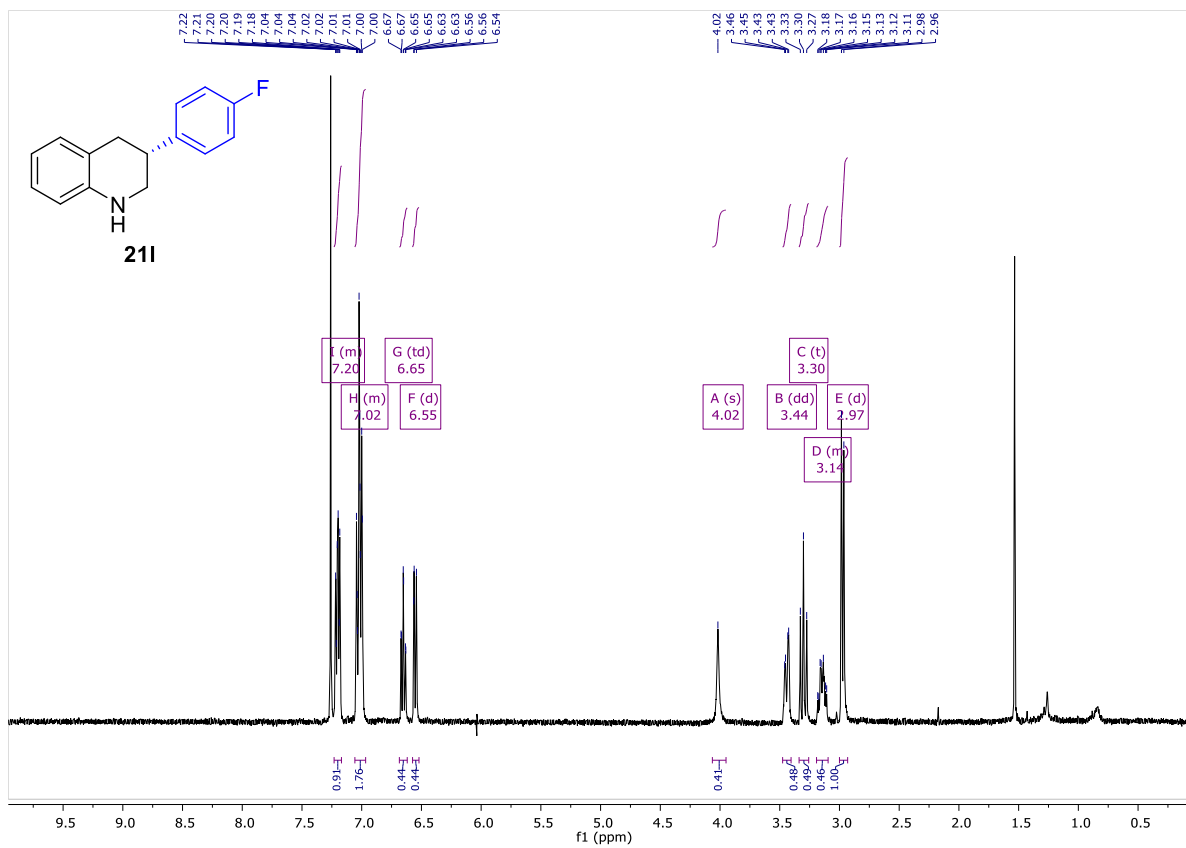

$^{13}\text{C-NMR}$  (101 MHz,  $\text{CDCl}_3$ ):

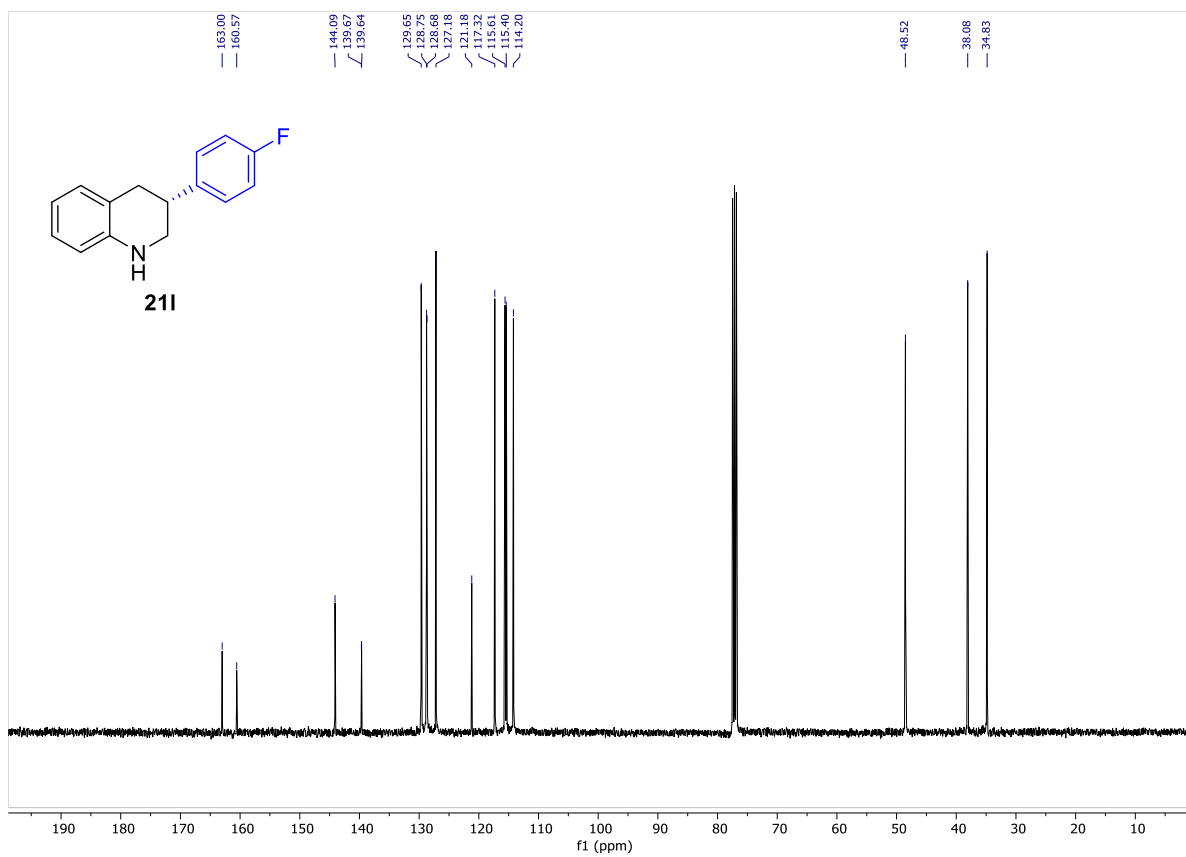

<sup>1</sup>H-NMR (400 MHz, CDCl<sub>3</sub>):

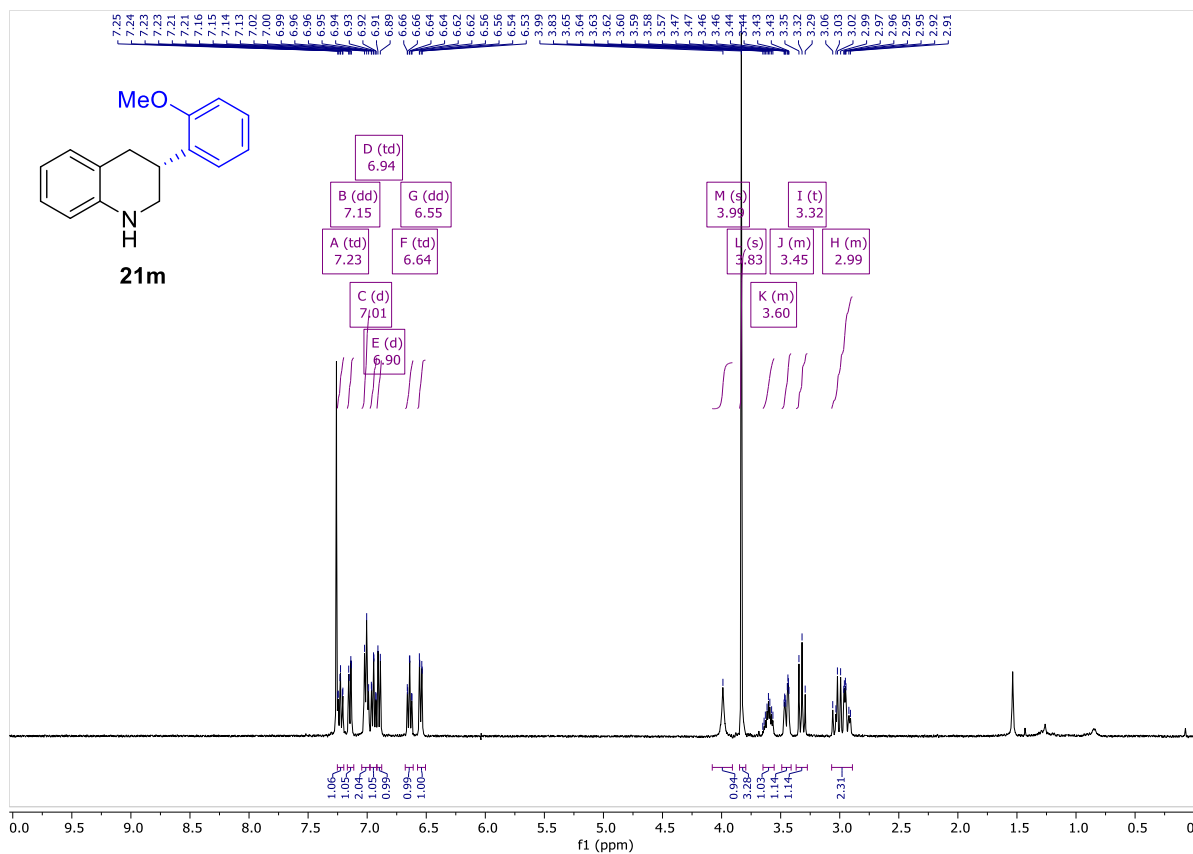

<sup>13</sup>C-NMR (101 MHz, CDCl<sub>3</sub>):

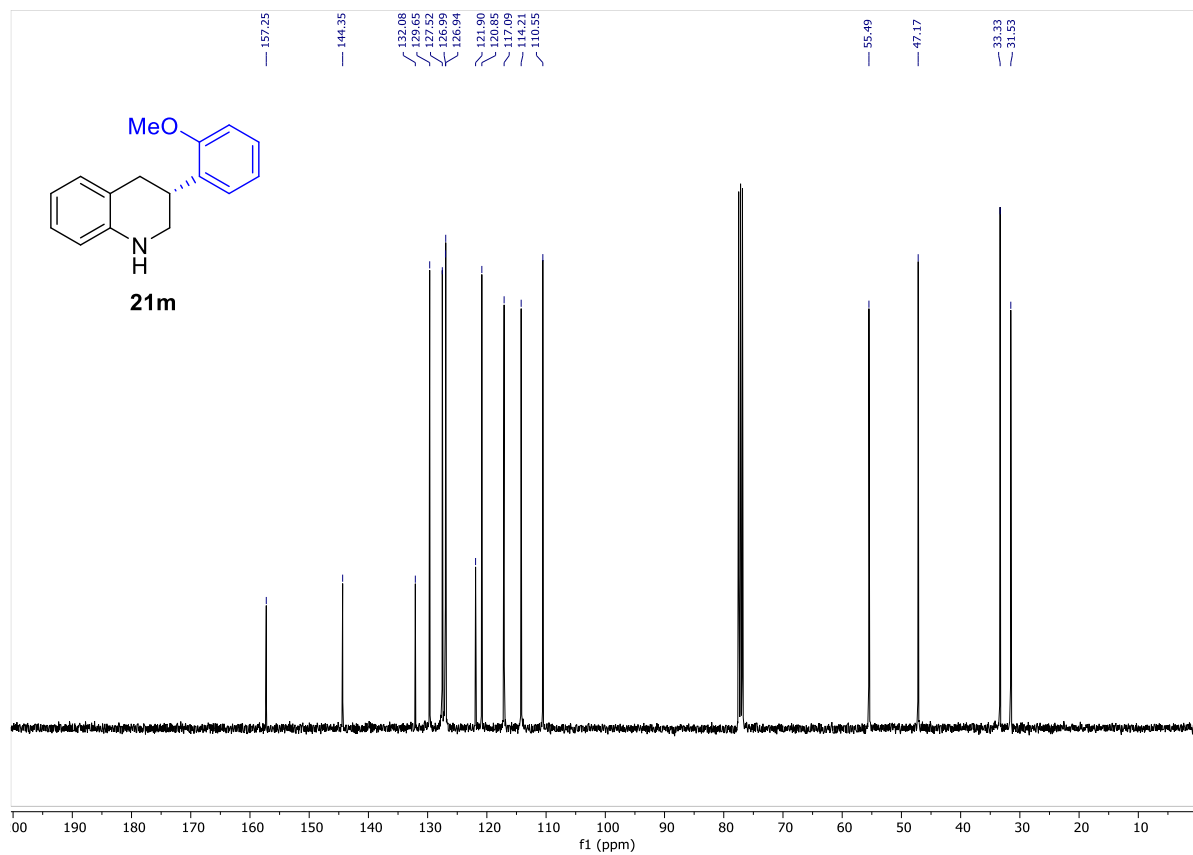

$^1\text{H-NMR}$  (400 MHz,  $\text{CDCl}_3$ ):

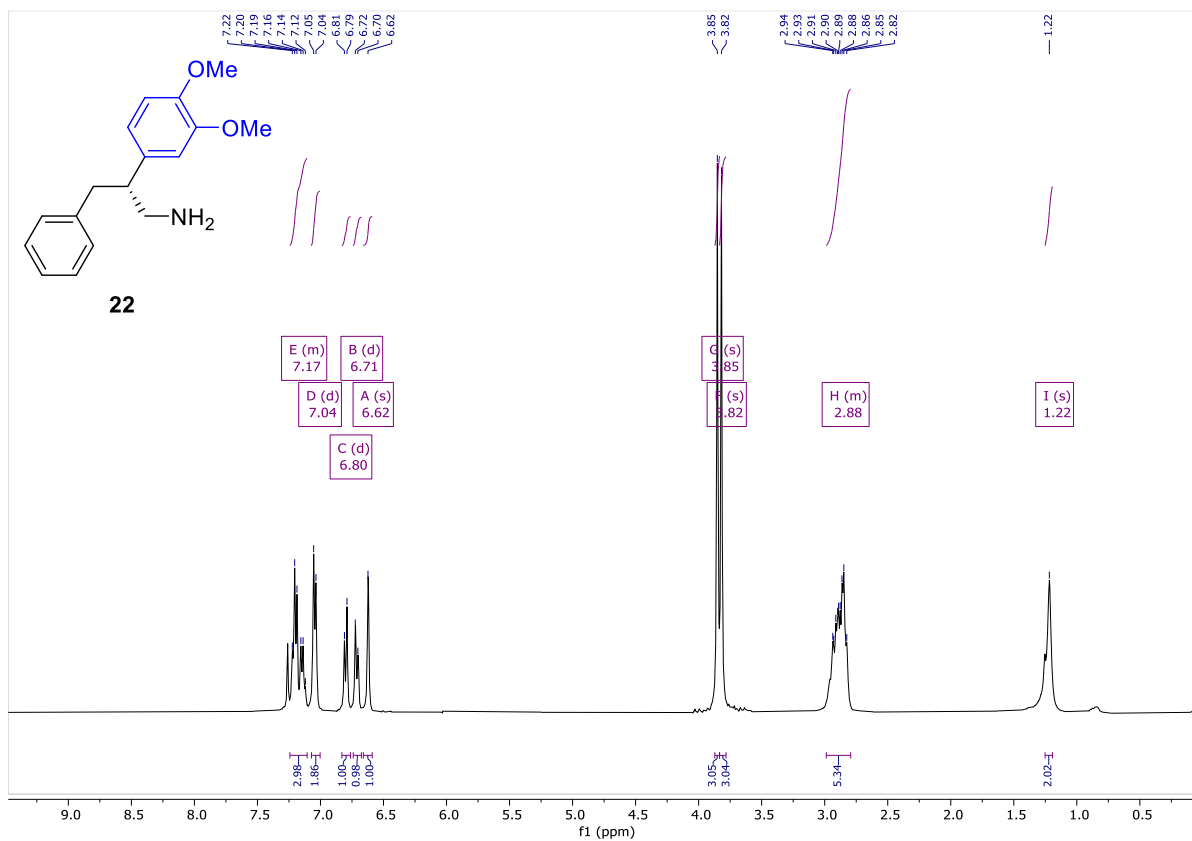

$^{13}\text{C-NMR}$  (101 MHz,  $\text{CDCl}_3$ ):

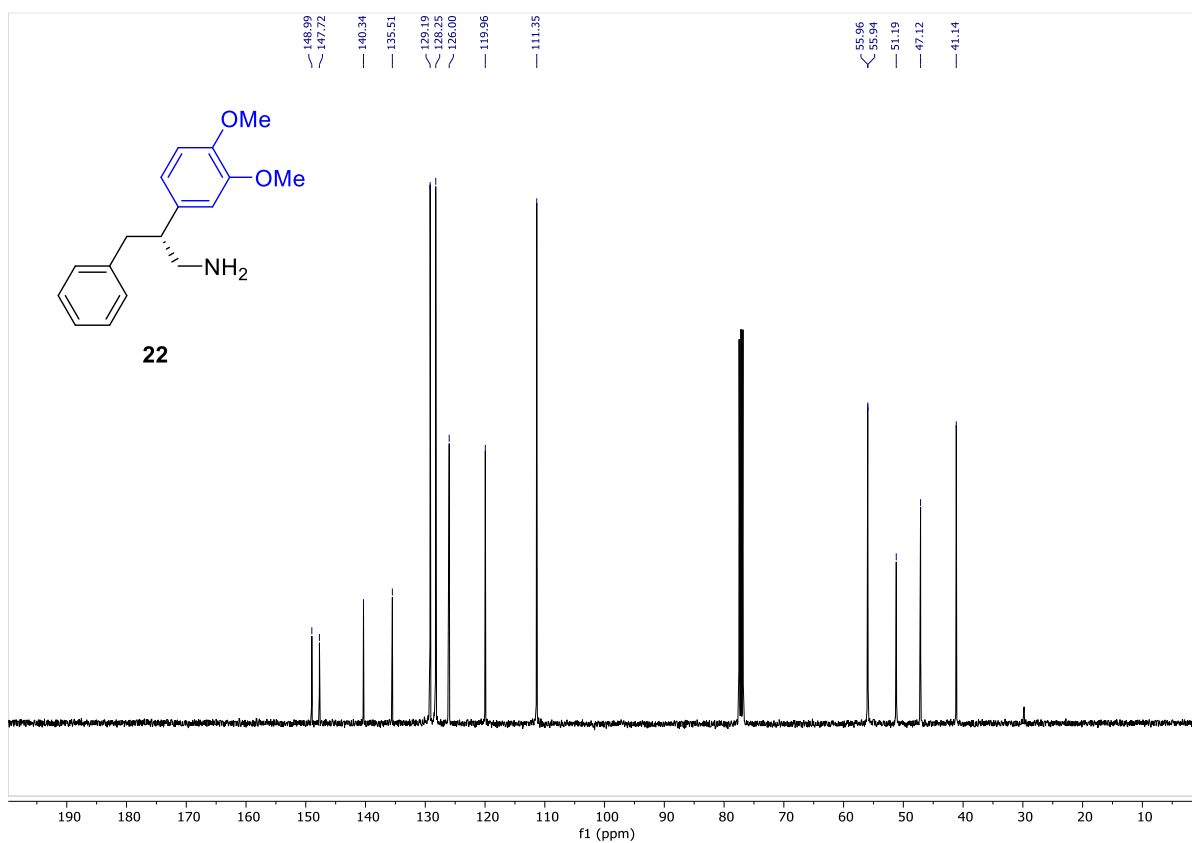

$^1\text{H-NMR}$  (400 MHz,  $\text{CDCl}_3$ ):

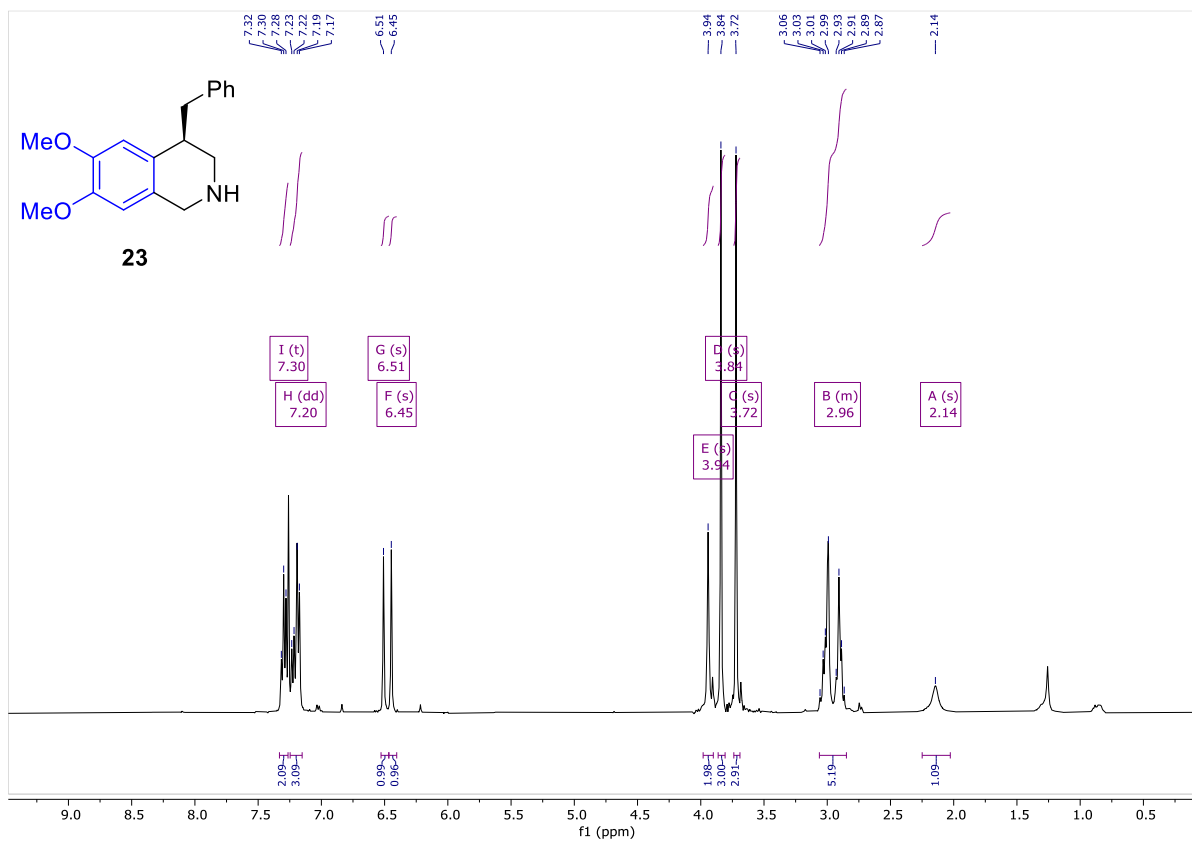

$^{13}\text{C-NMR}$  (101 MHz,  $\text{CDCl}_3$ ):

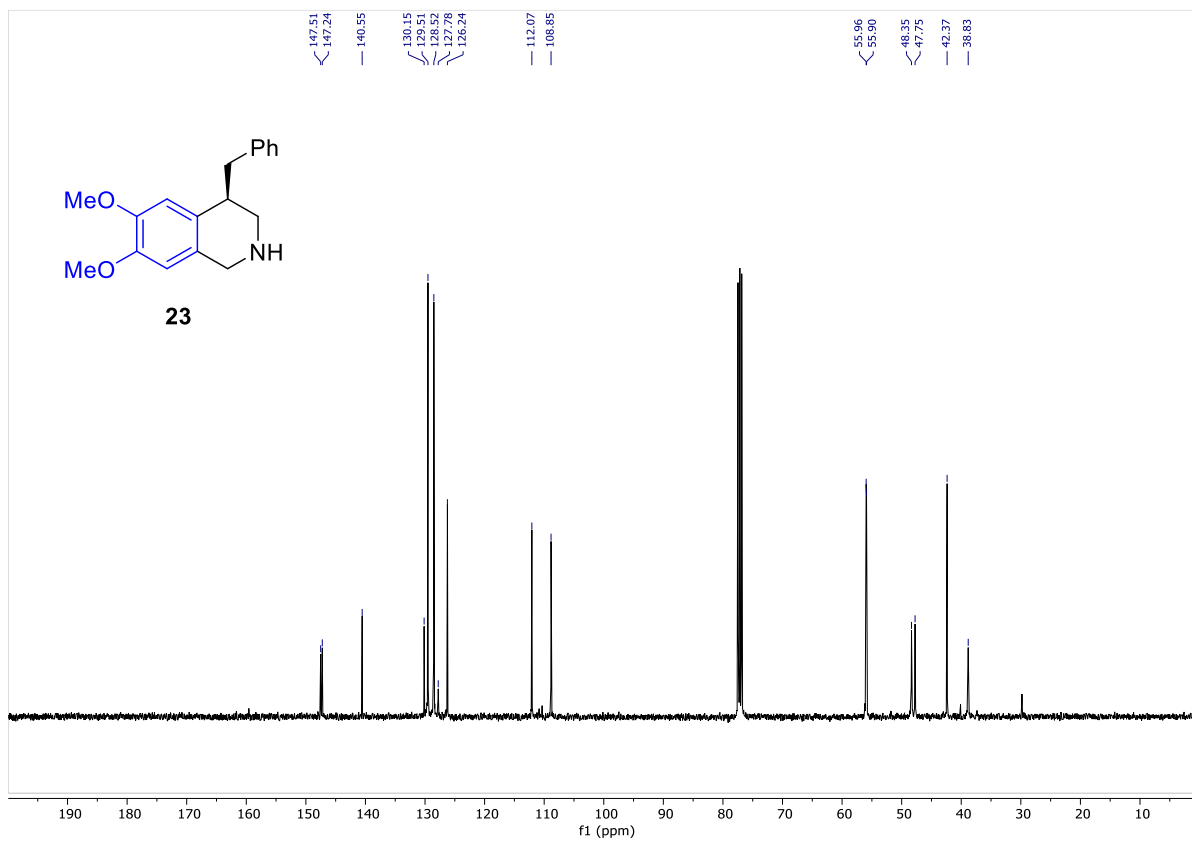

## 6. Chiral HPLC chromatographs

### *tert*-Butyl (*R*)-(2-(4-methoxyphenyl)-3-phenylpropyl)carbamate, 19a

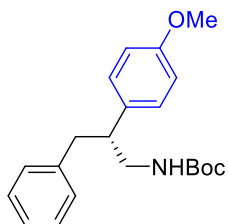

HPLC: Chiralpak IA, heptane:EtOH 98:2, 0.5 mL/min,  $\lambda = 210$  nm,  $t_R$  (*R*) = 18.1 min,  $t_R$  (*S*) = 20.4 min.

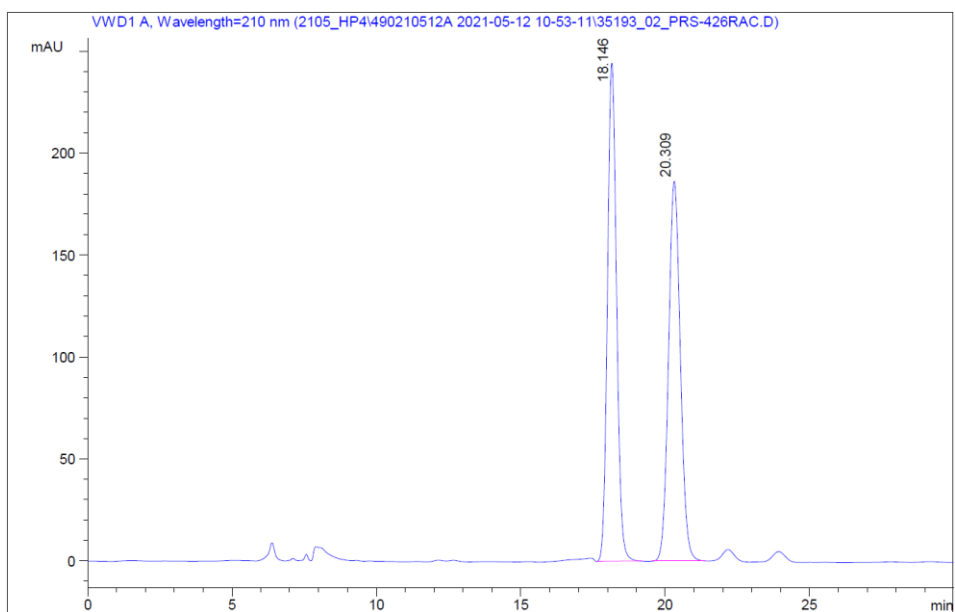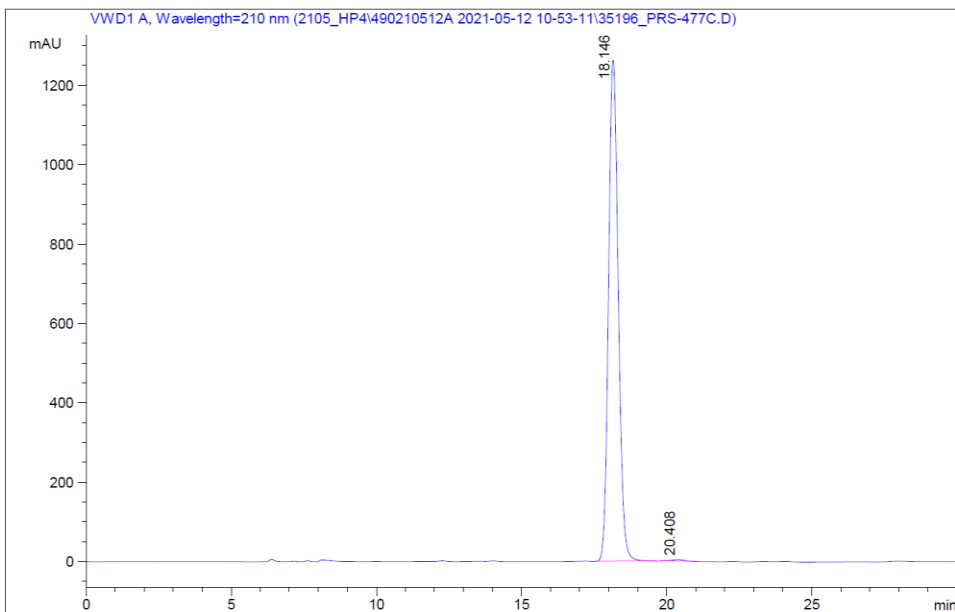

| # | Meas. R | Pea | Width | Area      | Height  | Area % |
|---|---------|-----|-------|-----------|---------|--------|
| 1 | 18.146  | MM  | 0.387 | 29343.912 | 1.264e3 | 99.514 |
| 2 | 20.408  | MM  | 0.560 | 143.214   | 4.262   | 0.486  |



***tert*-Butyl (*R*)-(2-(4-chlorophenyl)-3-phenylpropyl)carbamate, 19b**

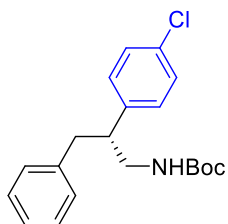

**HPLC:** Chiralpak IA, heptane:IPA 98:2, 0.5 mL/min,  $\lambda = 210$  nm,  $t_R$  (*R*) = 30.9 min,  $t_R$  (*S*) = 36.3 min.

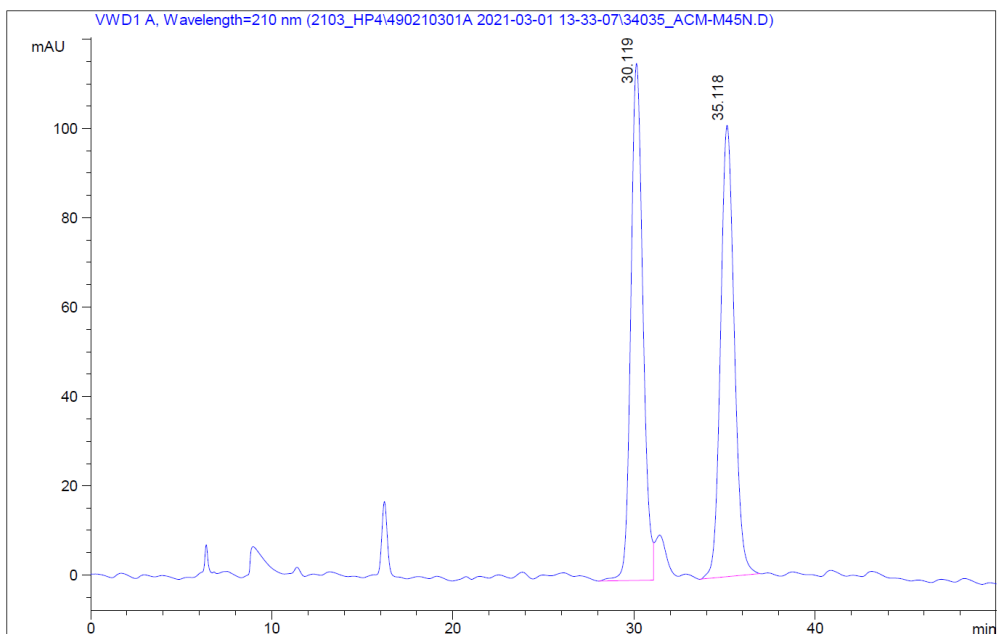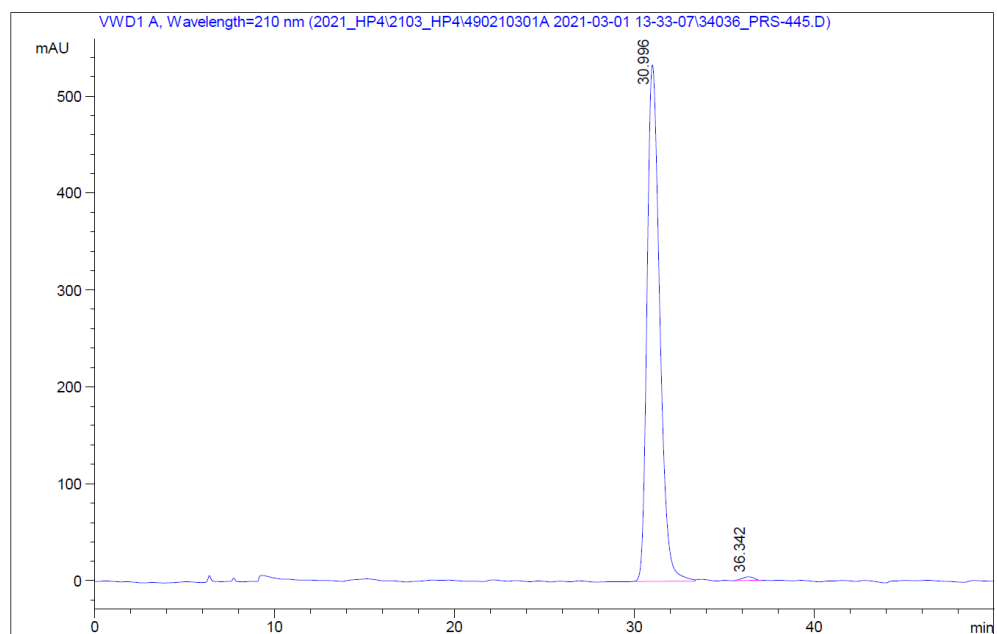

| # | Meas. R | Pea | Width | Area      | Height  | Area % |
|---|---------|-----|-------|-----------|---------|--------|
| 1 | 30.996  | BB  | 0.763 | 26085.484 | 533.156 | 99.258 |
| 2 | 36.342  | FM  | 0.809 | 195.133   | 4.022   | 0.742  |

***tert*-Butyl (*R*)-(2-(4-fluorophenyl)-3-phenylpropyl)carbamate, 19c**

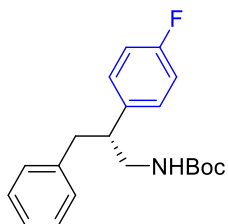

**HPLC:** Chiralpak IA, heptane:IPA 98:2, 0.5 mL/min,  $\lambda = 210$  nm,  $t_R$  (*R*) = 22.0 min,  $t_R$  (*S*) = 26.1 min.

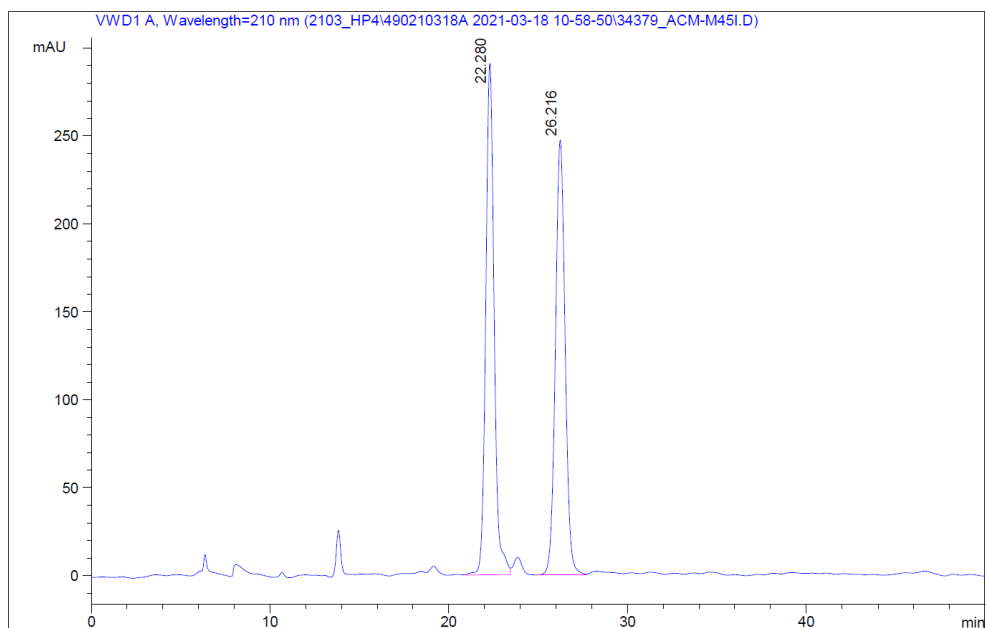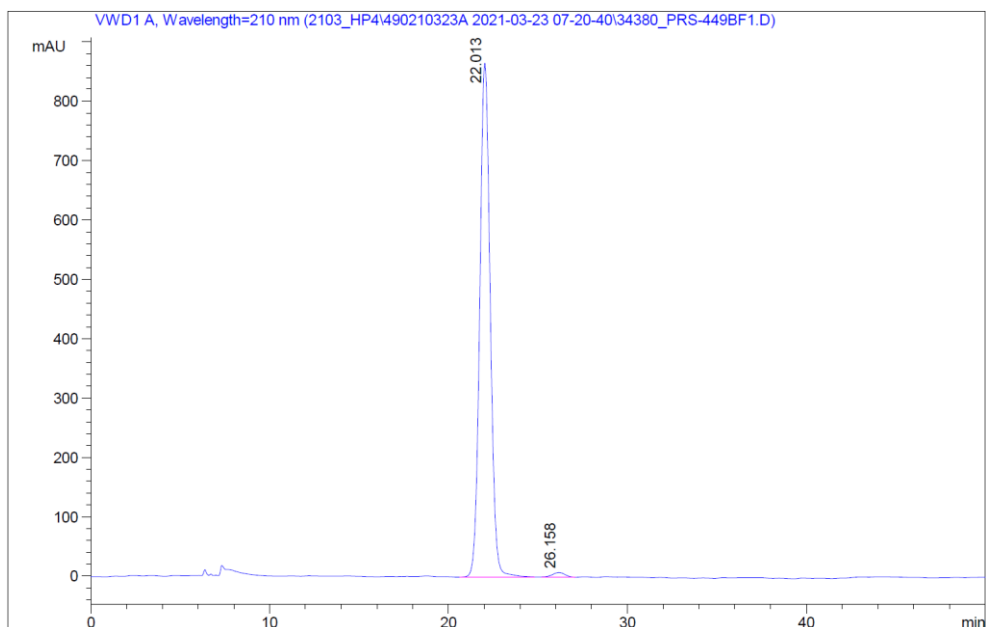

| # | Meas. R | Pea | Width | Area      | Height  | Area % |
|---|---------|-----|-------|-----------|---------|--------|
| 1 | 22.013  | BB  | 0.630 | 35073.121 | 865.437 | 98.962 |
| 2 | 26.158  | BV  | 0.732 | 367.762   | 7.692   | 1.038  |

***tert*-Butyl (*R*)-(2-(4-benzoylphenyl)-3-phenylpropyl)carbamate, 19d**

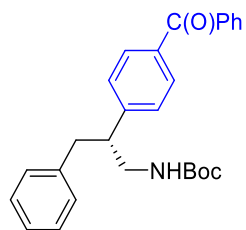

**HPLC:** Chiralpak IA, heptane:EtOH 9:1, 0.5 mL/min,  $\lambda = 210$  nm,  $t_R$  (*R*) = 18.2 min,  $t_R$  (*S*) = 21.0 min.

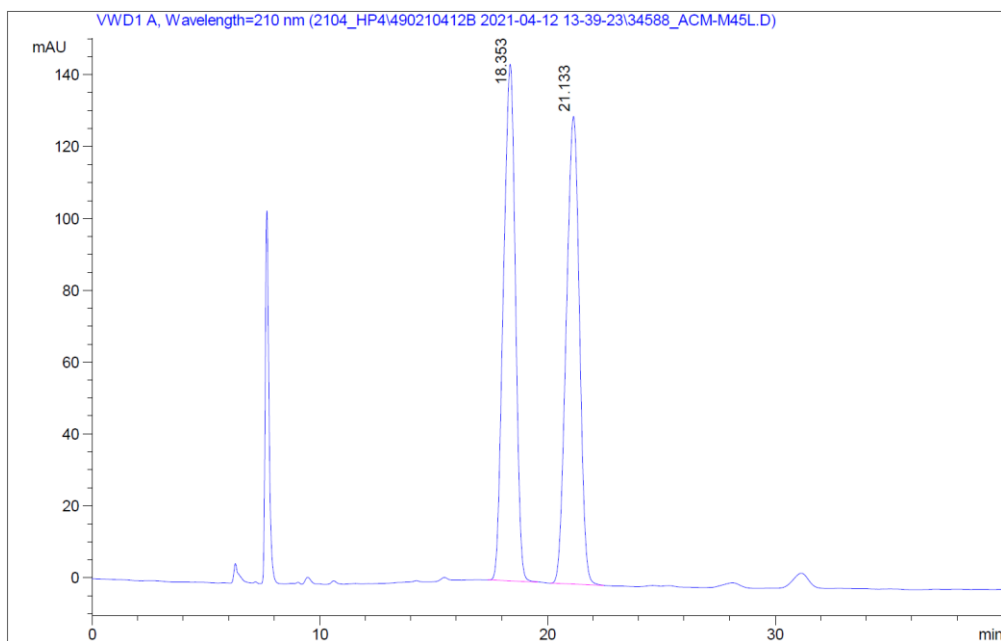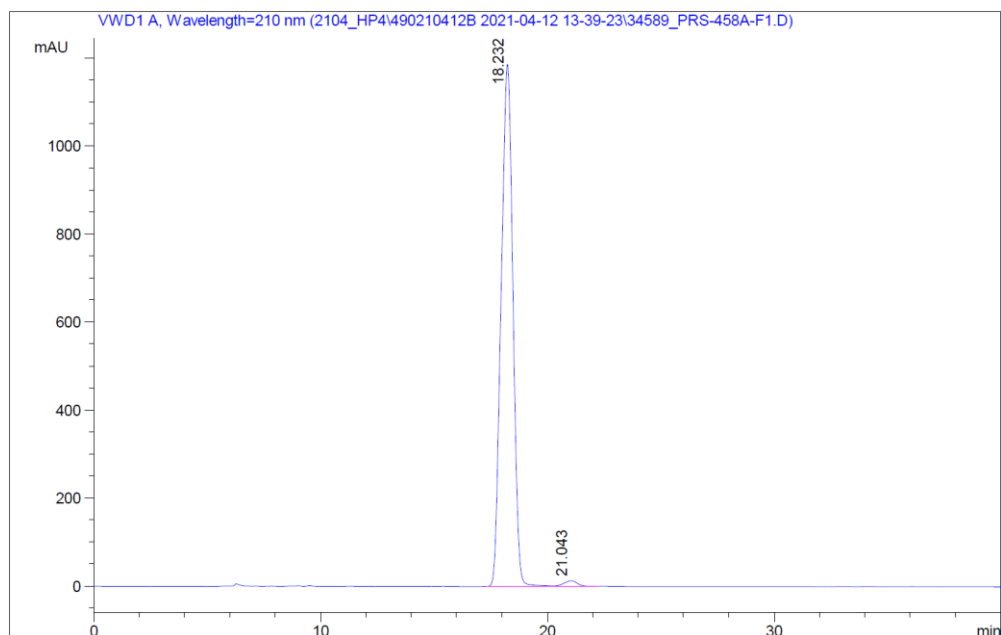

| # | Meas. R | Pea | Width | Area      | Height  | Area % |
|---|---------|-----|-------|-----------|---------|--------|
| 1 | 18.232  | BB  | 0.542 | 42573.789 | 1.186e3 | 98.837 |
| 2 | 21.043  | BB  | 0.645 | 500.867   | 12.338  | 1.163  |

# Methyl (R)-4-(1-((*tert*-butoxycarbonyl)amino)-3-phenylpropan-2-yl)benzoate, 19e

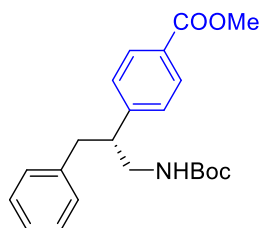

HPLC: Chiralpak IC, heptane:IPA 85:15, 0.5 mL/min,  $\lambda = 210$  nm,  $t_R(S) = 24.3$  min,  $t_R(R) = 27.1$  min.

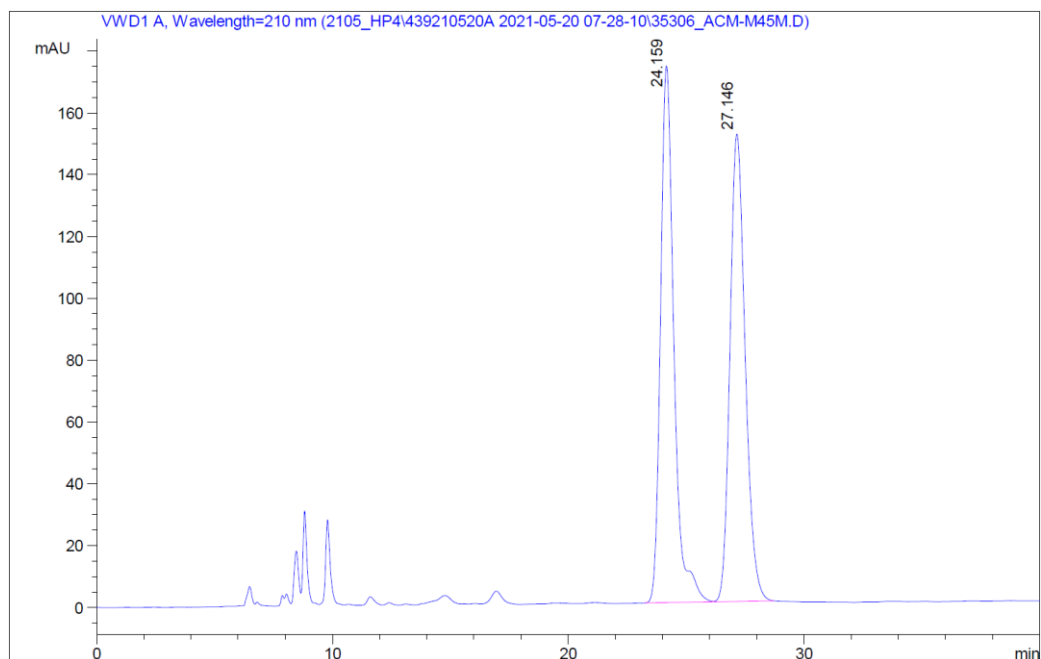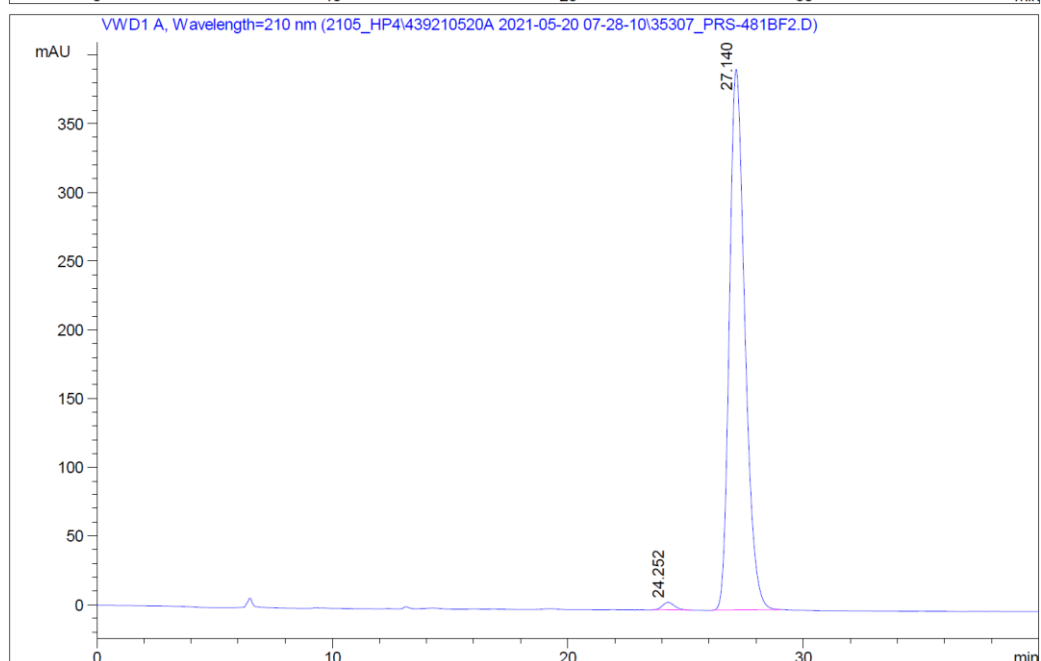

| # | Meas. R | Pea | Width | Area      | Height  | Area % |
|---|---------|-----|-------|-----------|---------|--------|
| 1 | 24.252  | BB  | 0.548 | 205.328   | 5.552   | 1.128  |
| 2 | 27.140  | BB  | 0.704 | 18002.125 | 393.482 | 98.872 |

**tert-Butyl (R)-(2-(2-methoxyphenyl)-3-phenylpropyl)carbamate, 19f**

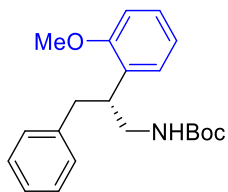

HPLC: Chiralpak IA, heptane:IPA 97:3, 0.5 mL/min,  $\lambda = 210$  nm,  $t_R(S) = 24.3$  min,  $t_R(R) = 27.1$  min.

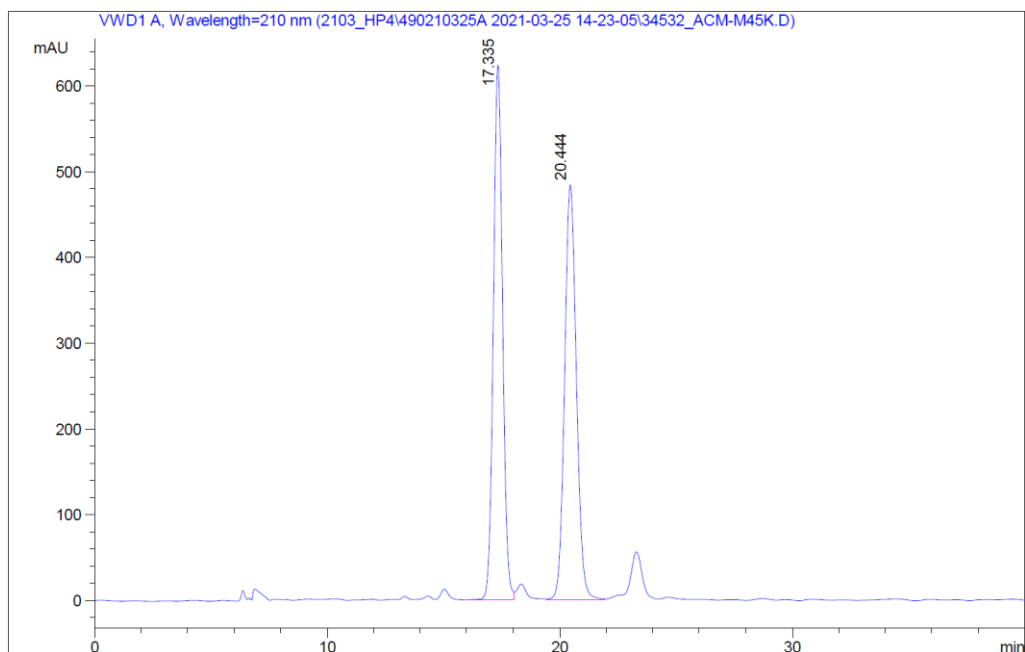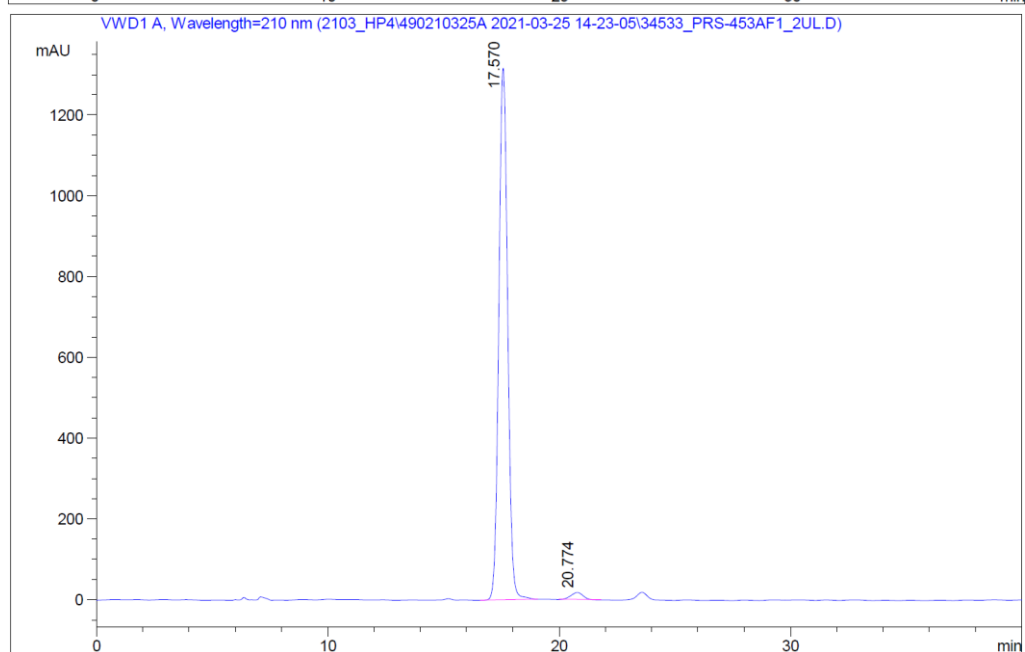

| # | Meas. R | Pea | Width | Area      | Height  | Area % |
|---|---------|-----|-------|-----------|---------|--------|
| 1 | 17.570  | VB  | 0.415 | 34974.305 | 1.317e3 | 98.147 |
| 2 | 20.774  | BB  | 0.581 | 660.134   | 17.754  | 1.853  |

***tert*-Butyl (*R*)-(2-(2-fluorophenyl)-3-phenylpropyl)carbamate, 19g**

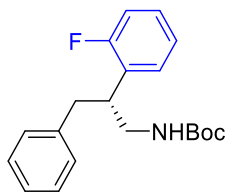

**HPLC:** Chiralpak IC, heptane:IPA 95:5, 0.5 mL/min,  $\lambda = 210$  nm,  $t_R$  (*R*) = 16.9 min,  $t_R$  (*S*) = 19.8 min.

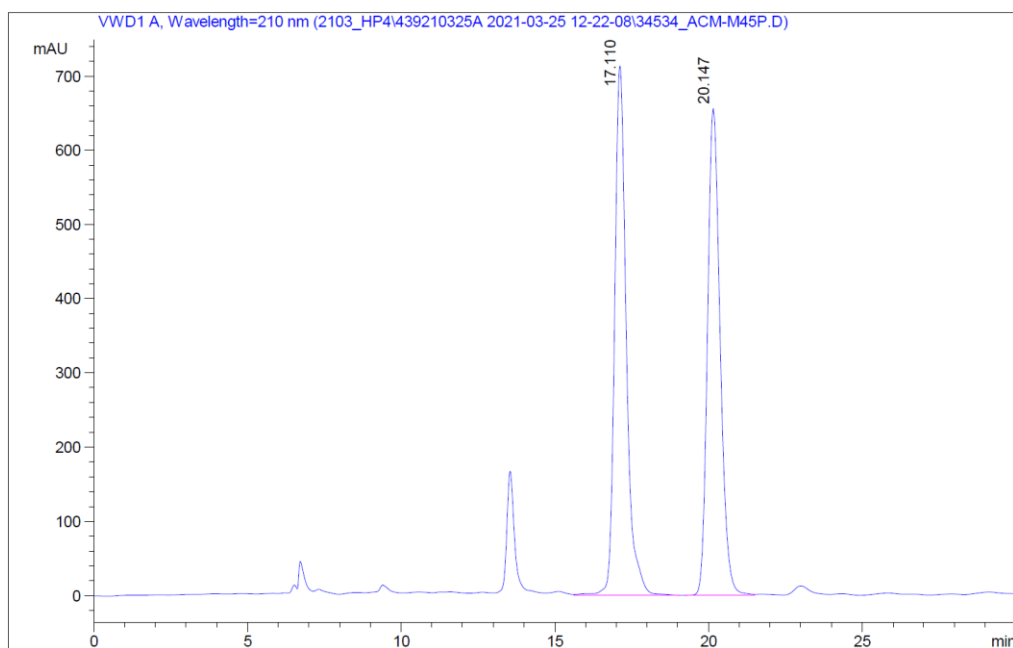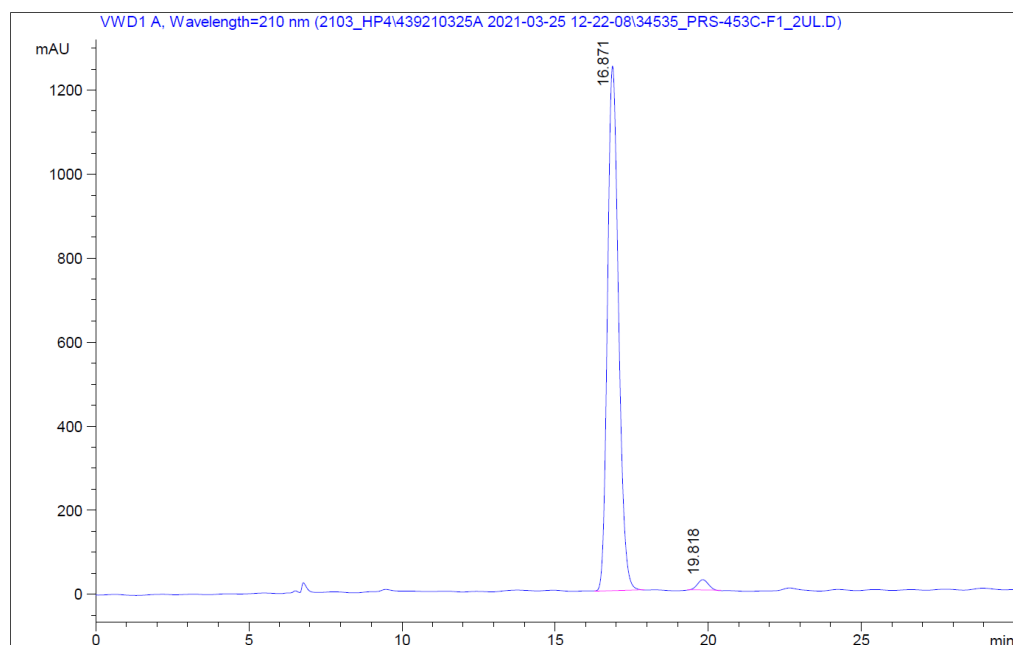

| # | Meas. R | Pea | Width | Area      | Height  | Area % |
|---|---------|-----|-------|-----------|---------|--------|
| 1 | 16.871  | MM  | 0.419 | 31432.643 | 1.251e3 | 97.966 |
| 2 | 19.818  | MM  | 0.429 | 652.561   | 25.381  | 2.034  |

***tert*-Butyl (*R*)-(3-phenyl-2-(*o*-tolyl)propyl)carbamate, 19h**

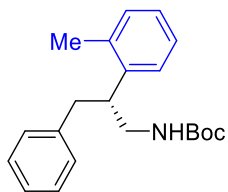

HPLC: Chiralpak IC, heptane:IPA 95:5, 0.5 mL/min,  $\lambda = 210$  nm,  $t_R$  (*R*) = 14.0 min,  $t_R$  (*S*) = 18.7 min.

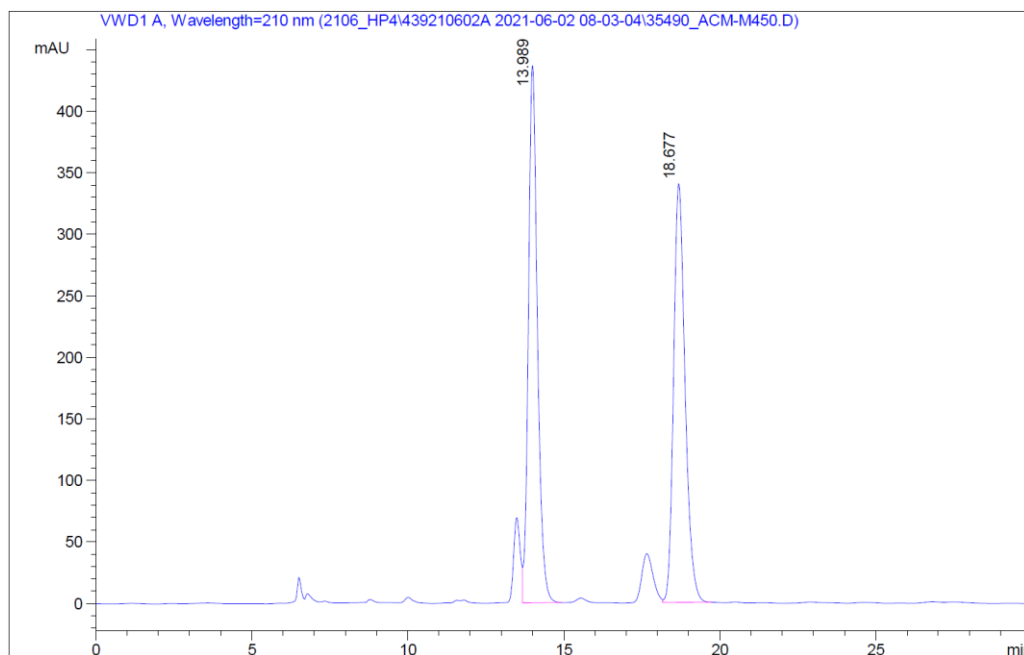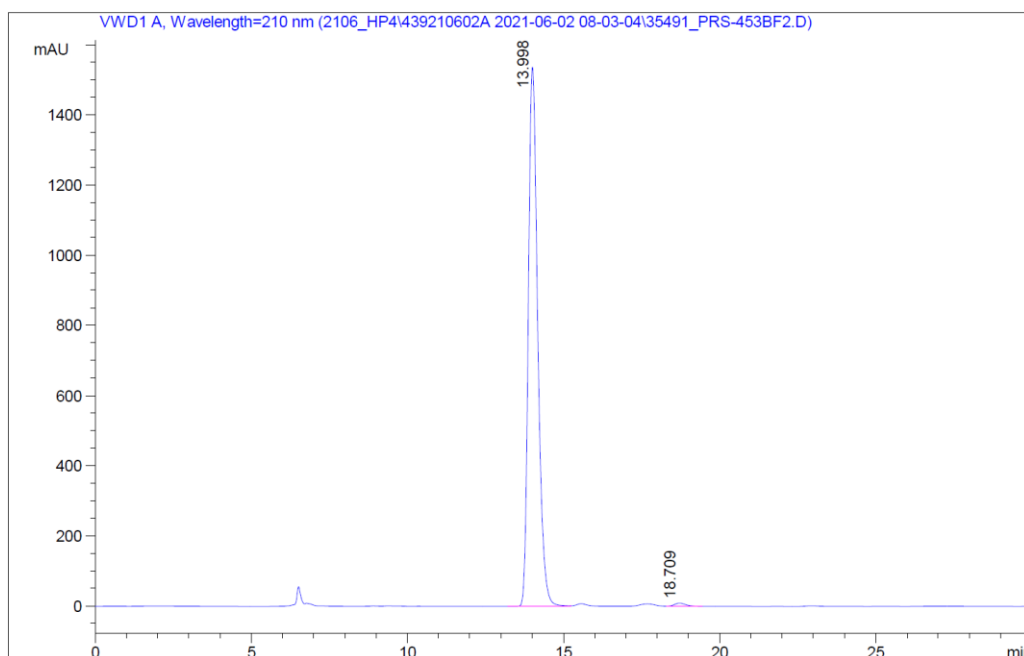

| # | Meas. R | Pea | Width | Area      | Height  | Area % |
|---|---------|-----|-------|-----------|---------|--------|
| 1 | 13.998  | VB  | 0.321 | 32182.211 | 1.538e3 | 99.274 |
| 2 | 18.709  | VB  | 0.385 | 235.209   | 9.298   | 0.726  |

***tert*-Butyl (*R*)-(2-(3,5-dimethylphenyl)-3-phenylpropyl)carbamate, 19i**

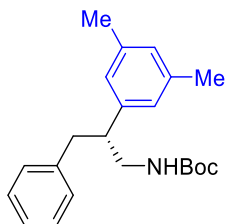

**HPLC:** Chiralpak IA, heptane:IPA 98:2, 0.5 mL/min,  $\lambda = 210$  nm,  $t_R$  (*R*) = 13.2 min,  $t_R$  (*S*) = 14.5 min.

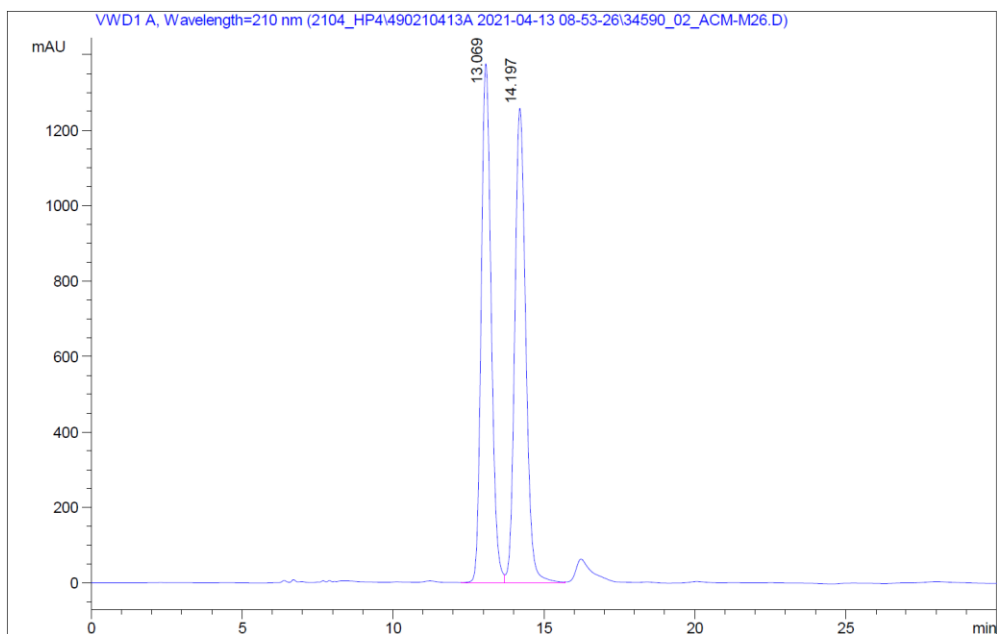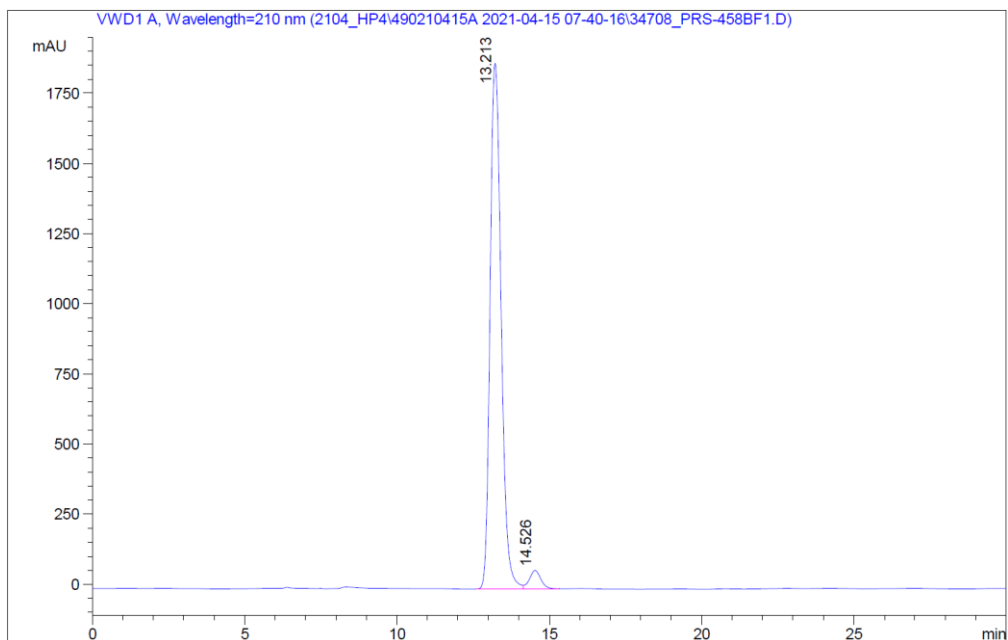

| # | Meas. R | Pea | Width | Area      | Height  | Area % |
|---|---------|-----|-------|-----------|---------|--------|
| 1 | 13.213  | MF  | 0.419 | 47086.941 | 1.874e3 | 96.457 |
| 2 | 14.526  | FM  | 0.438 | 1729.336  | 65.743  | 3.543  |



***tert*-Butyl (*R*)-(2-(3,5-dimethoxyphenyl)-3-phenylpropyl)carbamate, 19j**

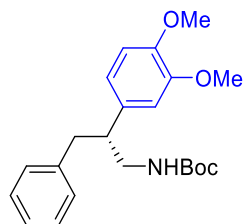

HPLC: Chiralpak IC, heptane:EtOH 8:2, 0.5 mL/min,  $\lambda = 210$  nm,  $t_R$  (*R*) = 13.9 min,  $t_R$  (*S*) = 17.4 min.

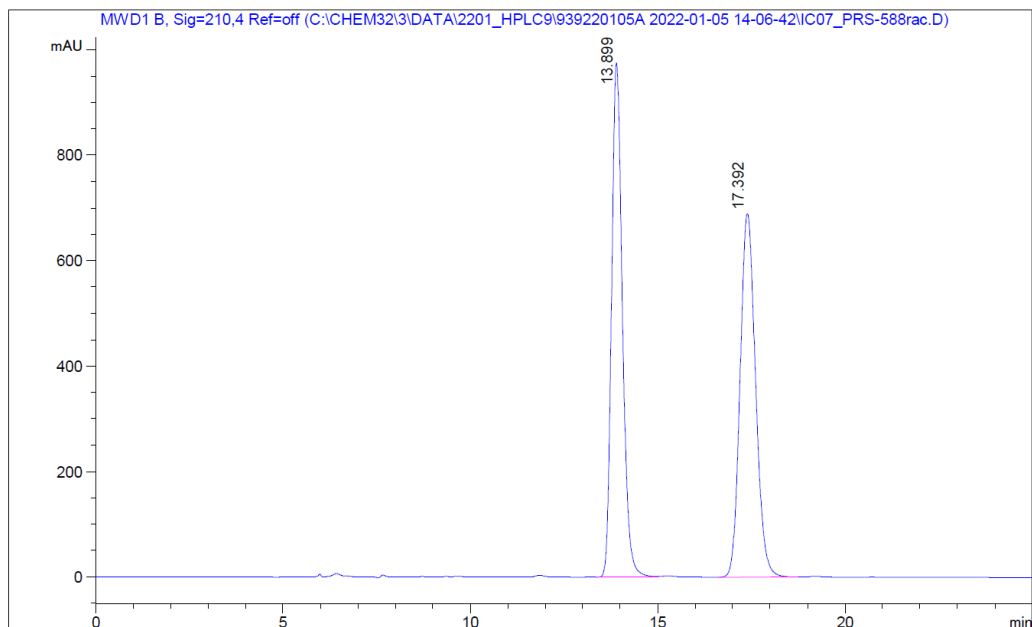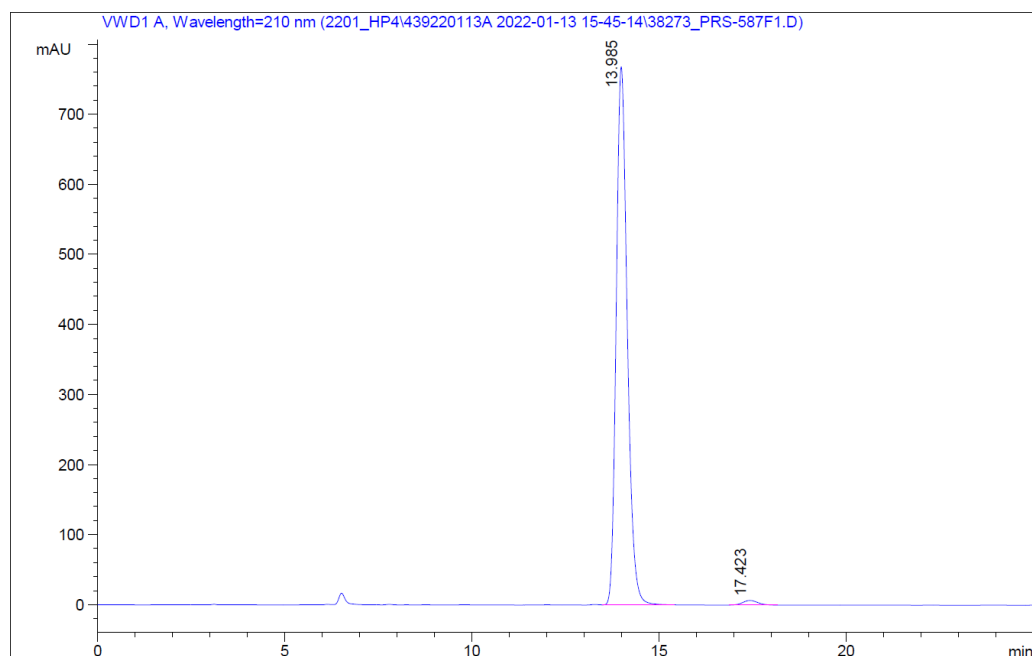

| # | Meas. R | Pea | Width | Area      | Height  | Area % |
|---|---------|-----|-------|-----------|---------|--------|
| 1 | 13.985  | VB  | 0.315 | 15737.816 | 768.176 | 98.796 |
| 2 | 17.423  | BB  | 0.441 | 191.741   | 6.690   | 1.204  |

***tert*-Butyl (R)-(3-(2-chlorophenyl)-2-phenylpropyl)carbamate, 19k**

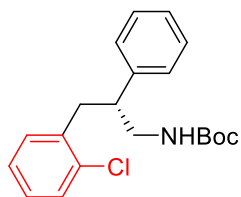

HPLC: Chiralpak IA, heptane:EtOH 98:2, 0.5 mL/min,  $\lambda = 210$  nm,  $t_R(R) = 14.0$  min,  $t_R(S) = 16.8$  min.

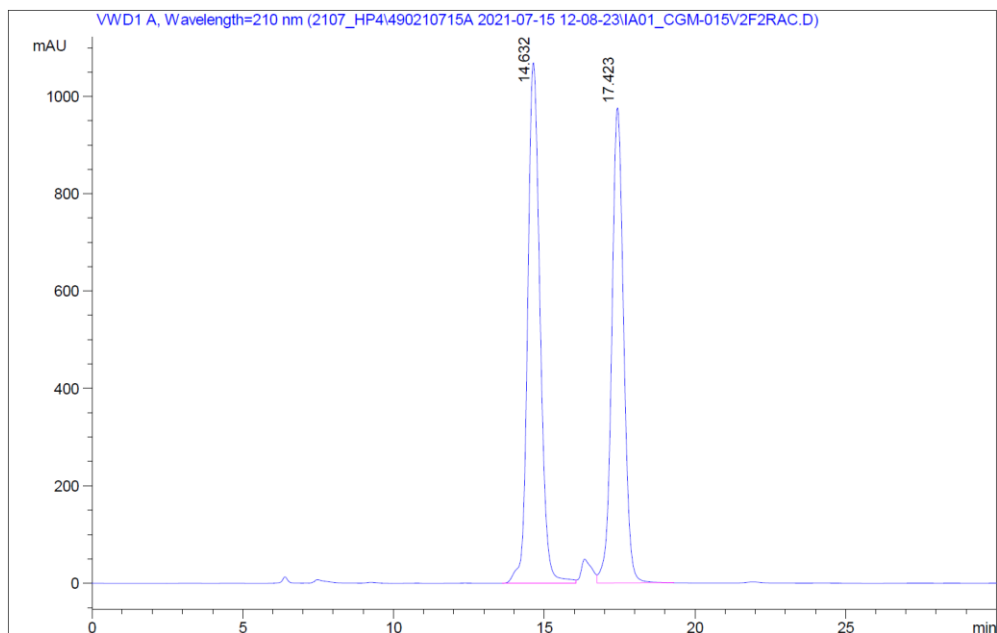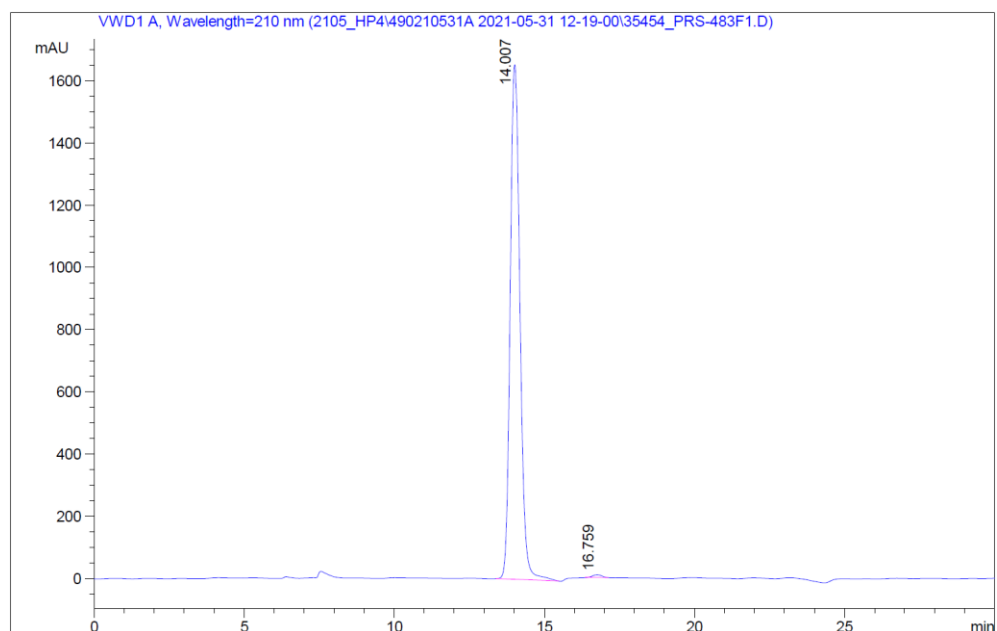

| # | Meas. R | Pea | Width | Area      | Height  | Area % |
|---|---------|-----|-------|-----------|---------|--------|
| 1 | 14.007  | MM  | 0.378 | 37533.992 | 1.655e3 | 99.431 |
| 2 | 16.759  | MM  | 0.371 | 214.712   | 9.640   | 0.569  |

***tert*-Butyl (*R*)-(3-(2-chlorophenyl)-2-phenylpropyl)carbamate, 191**

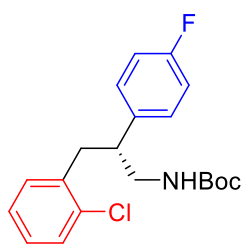

**HPLC:** Chiralpak IA, heptane:IPA 98:2, 0.5 mL/min,  $\lambda = 210$  nm,  $t_R$  (*R*) = 19.0 min,  $t_R$  (*S*) = 21.4 min.

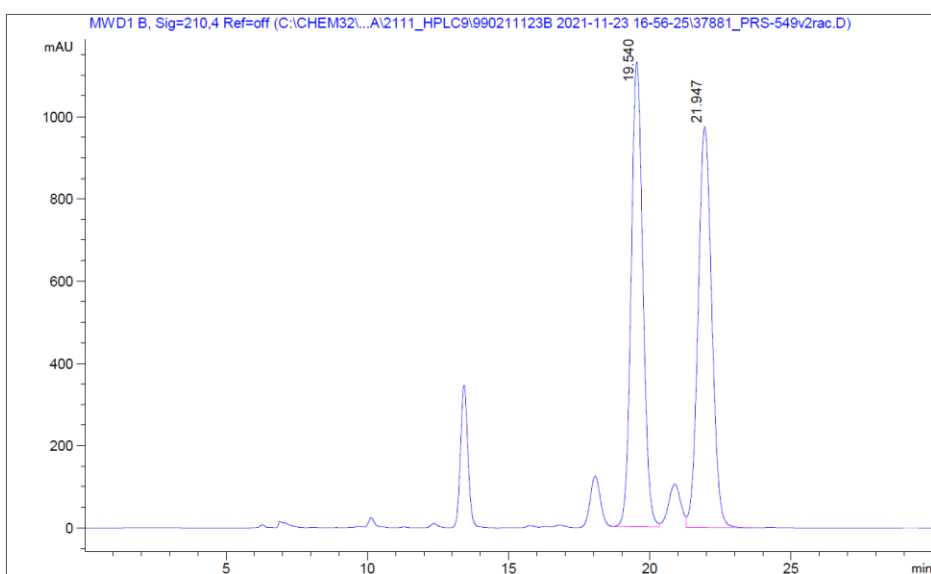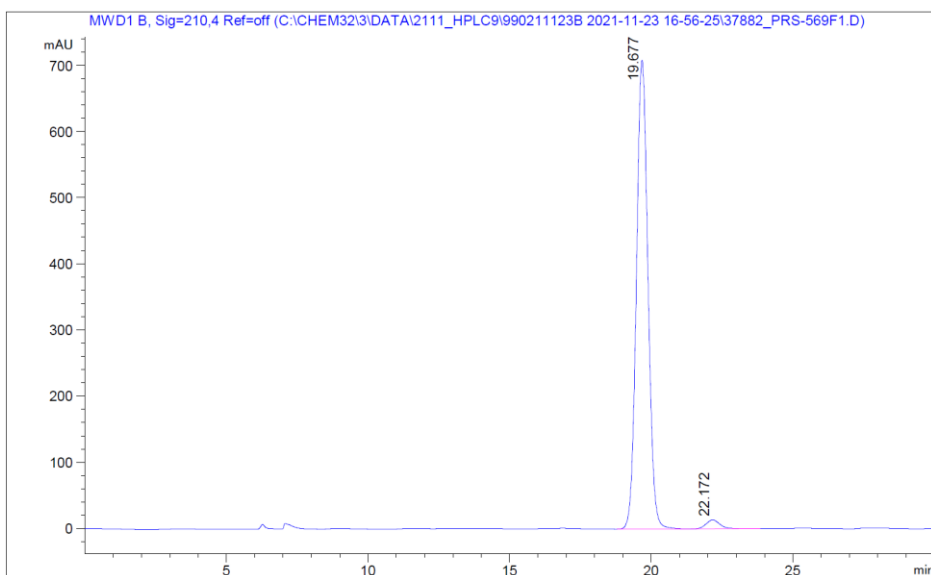

| # | Meas. R | Pea | Width | Area      | Height  | Area % |
|---|---------|-----|-------|-----------|---------|--------|
| 1 | 19.677  | BB  | 0.438 | 20069.332 | 708.767 | 97.716 |
| 2 | 22.172  | BB  | 0.516 | 469.184   | 13.475  | 2.284  |

***tert*-Butyl (*R*)-(3-(2-chlorophenyl)-2-(2-methoxyphenyl)propyl)carbamate, 19m**

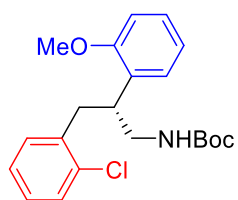

**HPLC:** Chiralpak IA, heptane:IPA 95:5, 0.5 mL/min,  $\lambda = 210$  nm,  $t_R$  (*R*) = 12.8 min,  $t_R$  (*S*) = 14.9 min.

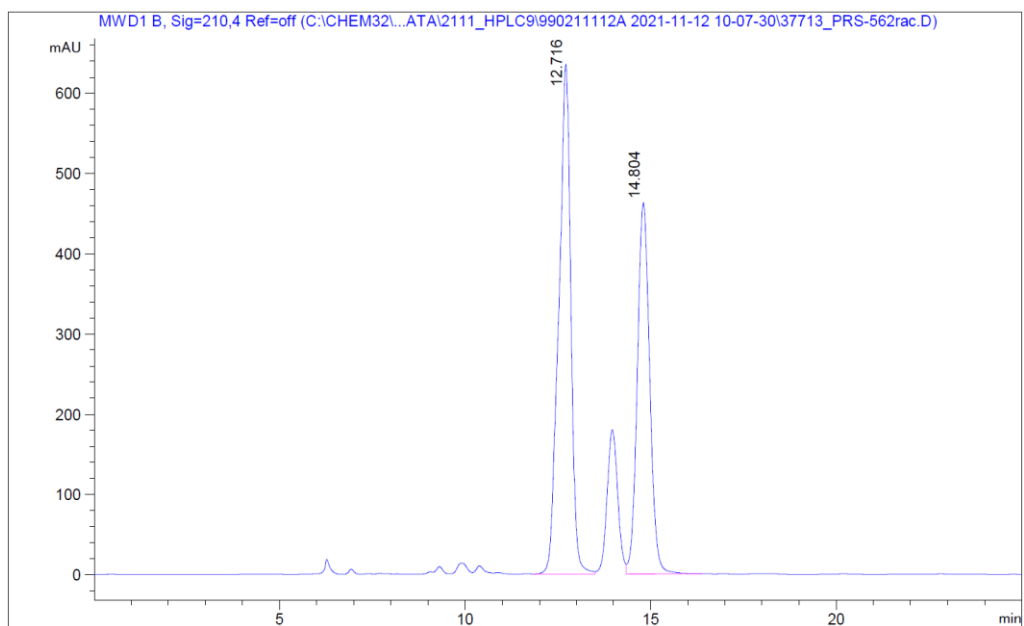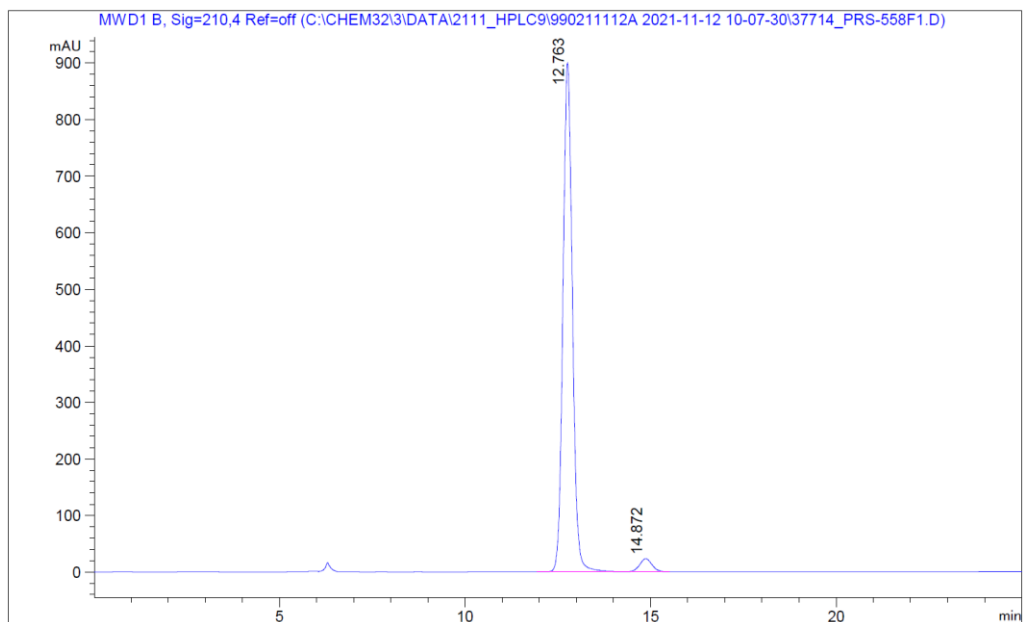

| # | Meas. R | Pea | Width | Area      | Height  | Area % |
|---|---------|-----|-------|-----------|---------|--------|
| 1 | 12.763  | BV  | 0.272 | 15905.613 | 899.543 | 96.818 |
| 2 | 14.872  | VB  | 0.358 | 522.677   | 22.779  | 3.182  |

**(R)-N-(2-(4-Methoxyphenyl)-3-phenylpropyl)-4-methylbenzenesulfonamide, 19n**

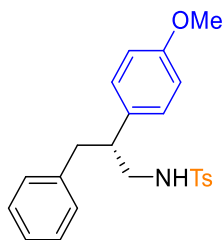

**HPLC:** Chiralpak IA, heptane:IPA 9:1, 0.5 mL/min,  $\lambda = 210$  nm,  $t_R$  (R) = 35.1 min,  $t_R$  (S) = 38.2 min.

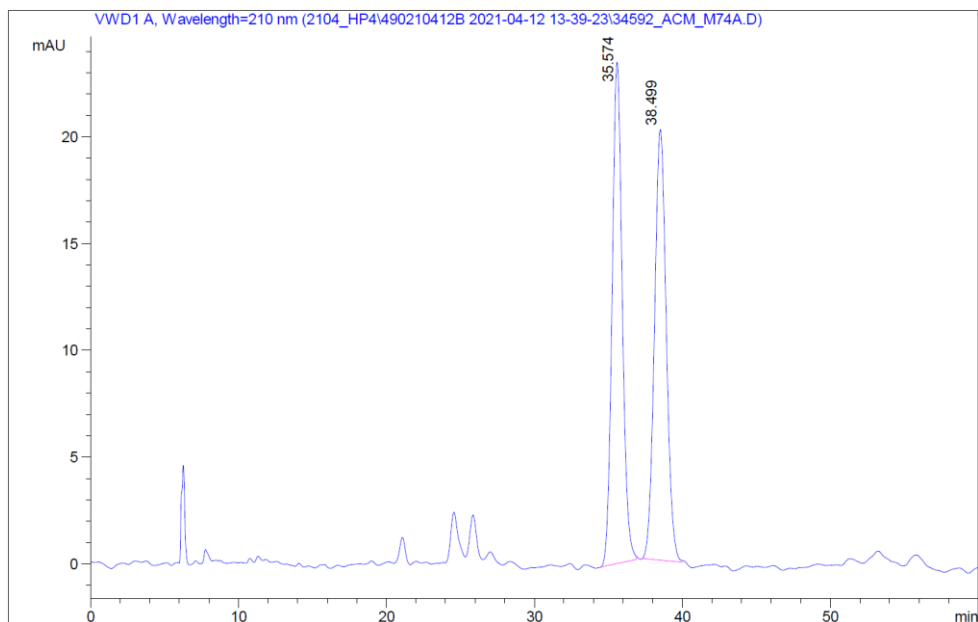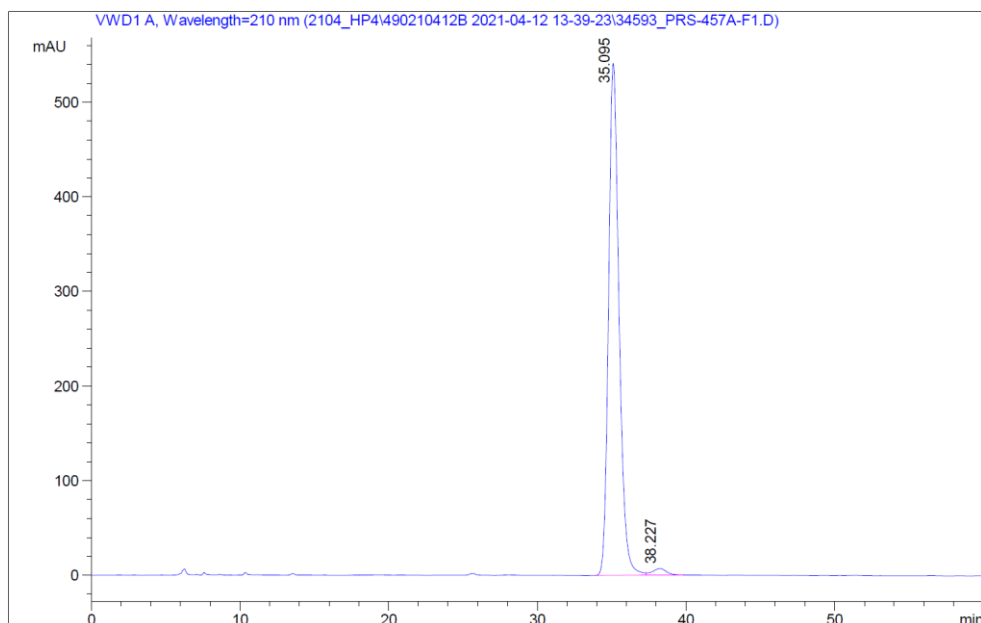

| # | Meas. R | Pea | Width | Area      | Height  | Area % |
|---|---------|-----|-------|-----------|---------|--------|
| 1 | 35.095  | BB  | 0.747 | 26572.695 | 541.596 | 98.248 |
| 2 | 38.227  | BB  | 0.961 | 473.932   | 7.163   | 1.752  |

**(R)-N-(2-(4-Chlorophenyl)-3-phenylpropyl)-4-methylbenzenesulfonamide, 19o**

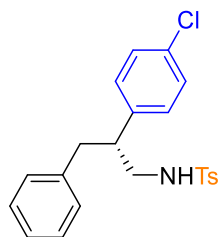

**HPLC:** Chiralpak IA, heptane:IPA 9:1, 0.5 mL/min,  $\lambda = 210$  nm,  $t_R$  (R) = 29.1 min,  $t_R$  (S) = 31.5 min.

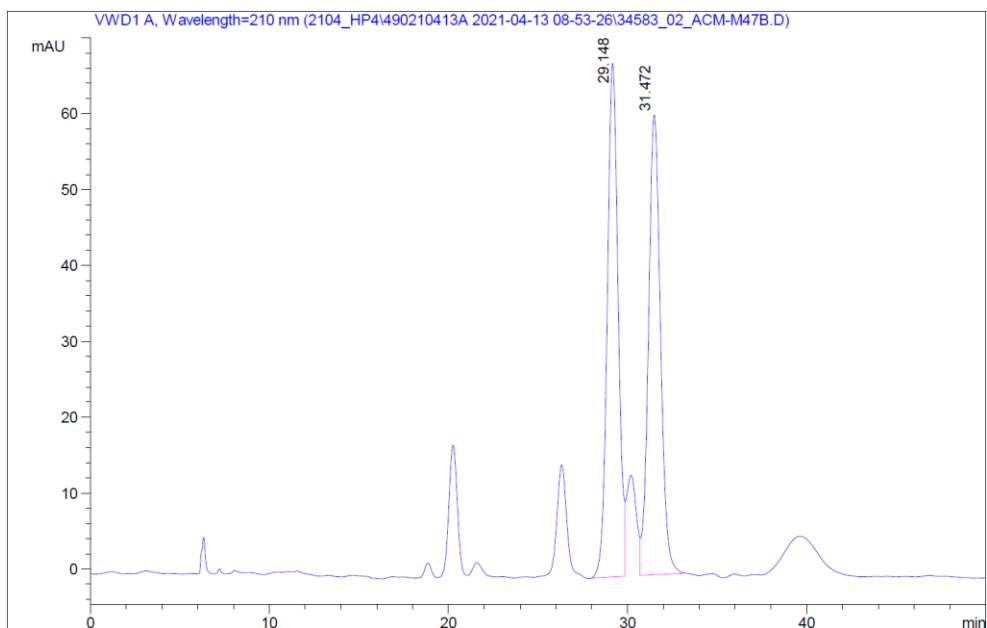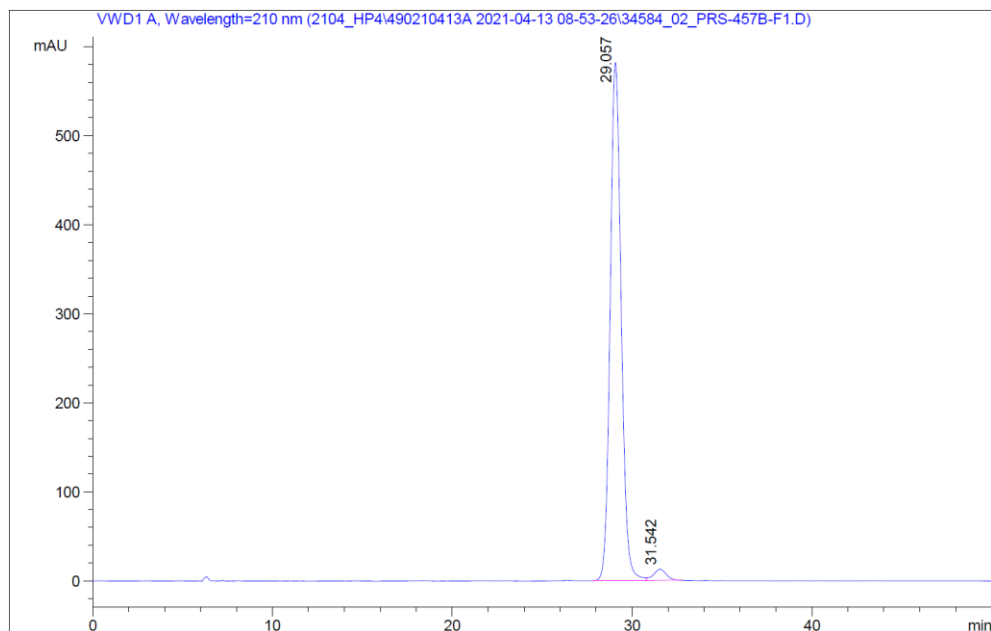

| # | Meas. R | Pea | Width | Area      | Height  | Area % |
|---|---------|-----|-------|-----------|---------|--------|
| 1 | 29.057  | BB  | 0.654 | 24659.762 | 582.248 | 97.508 |
| 2 | 31.542  | BB  | 0.763 | 630.312   | 12.553  | 2.492  |

**(R)-4-Methyl-N-(3-phenyl-2-(*o*-tolyl)propyl)benzenesulfonamide, 19p**

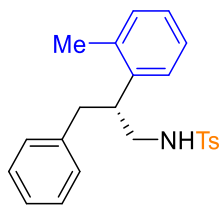

**HPLC:** Chiralpak IA, heptane:IPA 7:3, 0.5 mL/min,  $\lambda = 210$  nm,  $t_R(R) = 11.0$  min,  $t_R(S) = 12.6$  min.

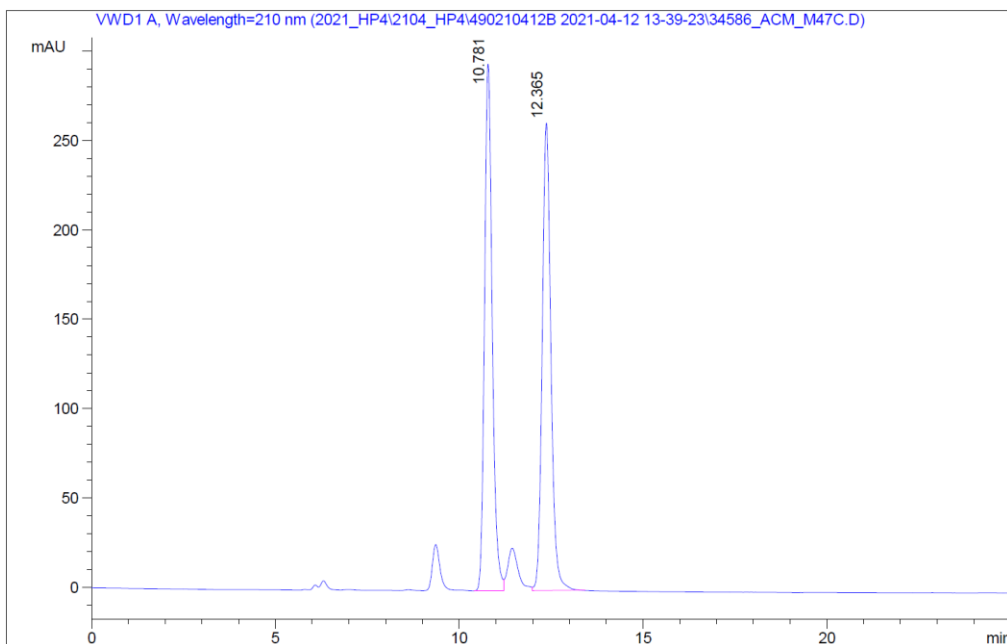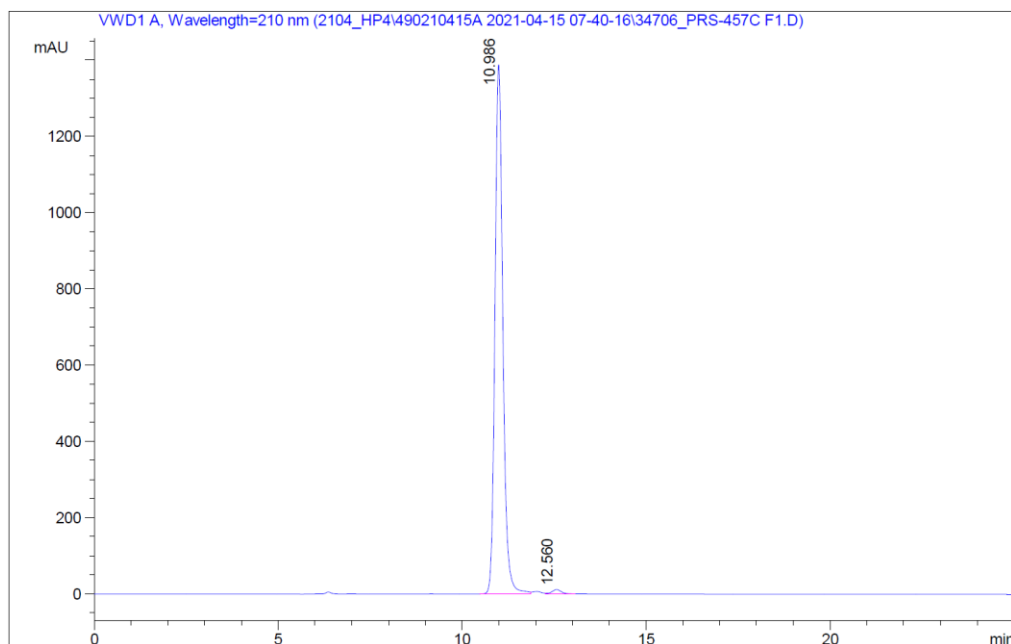

| # | Meas. R | Pea | Width | Area      | Height  | Area % |
|---|---------|-----|-------|-----------|---------|--------|
| 1 | 10.986  | MF  | 0.249 | 20756.172 | 1.389e3 | 99.003 |
| 2 | 12.560  | FM  | 0.301 | 208.991   | 11.559  | 0.997  |
